# Supplementary material
Source: publisher figshare collection journal article supplement (https://tandf.figshare.com/articles/dataset/_/24159024)
Supplement: Supplementary file 1 [file 1]

| <b>TMT channel</b> | <b>Datasets</b>                |
|--------------------|--------------------------------|
| 126                | CSF_deplete_PRISM_B1_TMT_F1-24 |
| TMT127N            | CSF_deplete_PRISM_B1_TMT_F1-24 |
| TMT127C            | CSF_deplete_PRISM_B1_TMT_F1-24 |
| TMT128N            | CSF_deplete_PRISM_B1_TMT_F1-24 |
| TMT128C            | CSF_deplete_PRISM_B1_TMT_F1-24 |
| TMT129N            | CSF_deplete_PRISM_B1_TMT_F1-24 |
| TMT129C            | CSF_deplete_PRISM_B1_TMT_F1-24 |
| TMT130N            | CSF_deplete_PRISM_B1_TMT_F1-24 |
| TMT130C            | CSF_deplete_PRISM_B1_TMT_F1-24 |
| TMT131N            | CSF_deplete_PRISM_B1_TMT_F1-24 |
| TMT131C            | CSF_deplete_PRISM_B1_TMT_F1-24 |
| 126                | CSF_deplete_PRISM_B2_TMT_F1-24 |
| TMT127N            | CSF_deplete_PRISM_B2_TMT_F1-24 |
| TMT127C            | CSF_deplete_PRISM_B2_TMT_F1-24 |
| TMT128N            | CSF_deplete_PRISM_B2_TMT_F1-24 |
| TMT128C            | CSF_deplete_PRISM_B2_TMT_F1-24 |
| TMT129N            | CSF_deplete_PRISM_B2_TMT_F1-24 |
| TMT129C            | CSF_deplete_PRISM_B2_TMT_F1-24 |
| TMT130N            | CSF_deplete_PRISM_B2_TMT_F1-24 |
| TMT130C            | CSF_deplete_PRISM_B2_TMT_F1-24 |
| TMT131N            | CSF_deplete_PRISM_B2_TMT_F1-24 |
| TMT131C            | CSF_deplete_PRISM_B2_TMT_F1-24 |
| 126                | CSF_deplete_PRISM_B3_TMT_F1-24 |
| TMT127N            | CSF_deplete_PRISM_B3_TMT_F1-24 |
| TMT127C            | CSF_deplete_PRISM_B3_TMT_F1-24 |
| TMT128N            | CSF_deplete_PRISM_B3_TMT_F1-24 |
| TMT128C            | CSF_deplete_PRISM_B3_TMT_F1-24 |
| TMT129N            | CSF_deplete_PRISM_B3_TMT_F1-24 |
| TMT129C            | CSF_deplete_PRISM_B3_TMT_F1-24 |
| TMT130N            | CSF_deplete_PRISM_B3_TMT_F1-24 |
| TMT130C            | CSF_deplete_PRISM_B3_TMT_F1-24 |
| TMT131N            | CSF_deplete_PRISM_B3_TMT_F1-24 |
| TMT131C            | CSF_deplete_PRISM_B3_TMT_F1-24 |
