# Supplementary material
Source: publisher figshare collection journal article supplement (https://tandf.figshare.com/articles/dataset/_/24159024)
Supplement: Supplementary file 1 [file 1]

## Sheet: Table S2_Quantified CSF protein
Protein	Gene	AA_031	BM_04	CB_010	CG_05	CW_141	DC_152	ES_01	FC_193	JR_165	JS_146	JT_09	KA_114	KF_011	KG_174	LB_035	LS_07	LW_183	MG_189	MN_03	MZ_201	PA_170	PK_030	RB_181	RB_192	RK_108	RR_011	RS_034	SK_150	SR_203	WS_179
1433B_HUMAN	YWHAB	-0.0185	0.0166	-0.0998	0.12	0.181	-0.0537	-0.127	0.0899	-0.0164	0.342	-0.056	0.18	0.0918	0.153	0.251	0.0171	-0.0538	-0.105	-0.0882	0.0736	0.181	-0.0196	0.0934	0.33	-0.0351	-0.106	-0.00412	0.0861	-0.0394	-0.0601
1433E_HUMAN	YWHAE	-0.00965	0.0247	-0.0108	0.0284	0.0357	-0.14	-0.16	0.167	-0.145	0.533	-0.0937	-0.0471	0.219	0.114	0.244	0.178	-0.197	-0.128	0.0241	-0.0543	-0.301	0.0794	0.015	0.426	-0.127	0.024	-0.0161	-0.121	-0.0538	-0.132
1433F_HUMAN	YWHAH	-0.162	-0.0458	-0.154	0.138	0.0629	-0.125	-0.135	-0.0361	-0.147	0.179	-0.000471	0.0682	0.0556	0.337	0.161	-0.047	-0.053	-0.281	0.0906	0.0402	0.125	-0.114	0.13	0.212	0.0272	-0.166	-0.076	-0.0327	0.272	-0.149
1433G_HUMAN	YWHAG	0.111	0.184	0.183	-0.198	0.183	0.143	-0.122	-0.0933	0.122	-0.0671	-0.109	0.033	0.311	-0.174	0.188	0.05	-0.0442	0.0666	0.109	0.0432	-0.303	0.0443	0.00873	0.3	-0.296	-0.05	-0.0165	-0.000841	-0.0277	-0.0811
1433T_HUMAN	YWHAQ	-0.12	-0.156	-0.0497	-0.376	0.159	-0.164	-0.15	0.0671	-0.12	0.358	-0.0517	0.328	0.162	-0.0504	0.408	0.0701	-0.148	0.0372	-0.278	-0.0927	0.142	0.102	0.00741	0.585	-0.123	-0.187	0.112	-0.219	-0.212	-0.329
1433Z_HUMAN	YWHAZ	-0.0295	-0.0116	-0.16	0.127	0.144	-0.219	-0.151	0.217	-0.0656	0.466	-0.058	0.0836	0.129	0.309	0.298	0.0075	-0.0133	-0.242	-0.0692	0.0973	0.00817	0.0289	0.0403	0.414	-0.209	0.0145	0.00393	0.0282	0.00182	-0.109
1A01_HUMAN	HLA-A	0.399	-0.748	0.065	-0.0924	-0.594	0.0846	-0.111	0.847	-1.07	0.678	0.334	-0.56	-0.216	0.593	0.27	0.204	-0.456	0.157	-0.0494	-0.918	-0.459	-0.842	-0.666	0.991	-0.343	0.164	0.422	0.723	0.198	-0.741
1A02_HUMAN	HLA-A	-0.133	-0.12	0.218	-0.188	0.38	0.129	0.284	-0.309	-0.059	-0.15	-0.202	0.287	-0.221	-0.333	-0.803	0.174	0.00482	0.227	-0.313	0.0906	0.0868	0.23	-0.472	0.356	0.0643	-0.426	-0.333	-0.494	-0.31	-0.0861
1A24_HUMAN	HLA-A	0.753	-0.0555	-0.286	-0.308	0.22	-0.292	0.187	0.236	1.14	-0.583	-0.204	0.255	0.043	0.386	0.102	1.23	-0.641	0.0114	0.00363	-0.0263	0.78	1.03	1.16	0.74	1.1	-0.213	-0.119	-0.115	-0.254	-0.322
1A25_HUMAN	HLA-A	2.21	-0.173	-1.47	-0.427	2.33	0.384	-0.763	0.562	0.596	0.203	1.06	0.795	-0.419	0.327	-0.529	1.33	-0.101	-0.203	0.259	0.661	2.23	3.49	0.344	-2.27	1.22	0.0415	-0.493	-1.22	-1.03	1.18
1A69_HUMAN	HLA-A	-0.209	-0.12	-0.141	0.791	-0.335	-0.243	1.05	0.0217	-0.0462	0.0836	-0.365	0.493	0.655	-0.321	1.02	-0.295	0.0478	-0.379	0.669	-0.35	0.0854	-0.555	0.243	0.596	-0.187	0.633	0.399	0.686	-0.622	0.0455
1B07_HUMAN	HLA-B	0.63	-0.512	-0.268	-0.255	0.0342	3.29	-0.242	-1.02	0.116	2.76	-0.672	0.0789	-0.0159	-0.131	4.32	0.526	-0.0128	-0.27	0.372	0.0445	2.68	3.37	0.142	2.38	-0.488	0.578	0.479	0.35	0.325	0.0517
1B08_HUMAN	HLA-B	0.12	0.721	0.885	-1.06	-0.686	0.758	-0.833	1.2	0.186	0.284	2.33	0.64	-0.306	0.52	-0.664	-1.04	-0.967	-0.108	-1.34	-0.307	0.306	-1.88	-0.714	1.24	0.914	1.33	1.06	-0.896	-0.722	-0.913
1B15_HUMAN	HLA-B	1.32	0.18	-0.872	0.206	0.694	-0.683	-0.793	0.0729	-0.55	-1.05	-0.258	0.866	0.185	1.09	-0.665	-0.534	-0.339	0.0534	0.0681	0.0816	0.427	0.369	-0.191	-0.627	0.148	0.915	0.839	-0.361	-0.353	-0.296
1B27_HUMAN	HLA-B	3.81	0.0681	-0.582	0.194	0.518	-0.133	0.231	0.571	0.0866	0.804	-0.871	-0.131	-0.114	3.29	3.39	-0.0554	-0.35	-0.578	-0.0343	-0.0775	0.0105	-1.12	-0.0921	0.506	0.191	0.0412	-0.168	-0.188	3.02	3.35
1B44_HUMAN	HLA-B	0.198	0.949	0.911	-0.253	0.0518	0.911	1.79	-0.222	1.36	-0.288	-0.418	-0.0748	2.02	-0.301	-0.164	0.983	0.953	0.128	-0.147	1.51	0.0932	0.316	2.35	-0.425	-0.452	0.00484	0.234	0.236	-0.194	-0.381
1C01_HUMAN	HLA-C	-0.0801	-0.159	0.127	-0.077	2.89	0.319	-0.124	-0.322	-0.0374	0.523	2.15	0.164	-0.704	0.159	0.0733	1.82	0.0326	-0.596	1.94	1.87	-0.141	2.61	0.0773	-0.715	1.46	-0.261	2.21	-0.281	-0.68	0.749
1C02_HUMAN	HLA-C	2.91	0.192	1.04	0.168	-0.0189	1.05	0.166	0.104	0.262	-0.247	-0.224	-0.0959	3	-0.461	1.92	-0.389	1.79	-0.0733	-0.46	-0.636	-0.276	0.139	-0.553	-0.303	-0.376	-0.695	-0.353	2.12	2.14	-0.131
1C06_HUMAN	HLA-C	-0.382	0.134	-0.296	0.134	0.161	0.124	0.209	-0.0481	0.501	-0.521	-0.088	-0.0702	-0.226	-0.403	0.0993	-0.455	0.177	0.428	0.27	0.0927	0.0988	-0.176	0.0658	0.365	-0.207	-0.458	-0.0241	-0.203	0.338	-0.404
2AAA_HUMAN	PPP2R1A	-0.154	-0.464	-0.0509	-0.199	0.362	0.0624	0.00168	0.757	-0.234	1.91	-0.323	0.467	-0.321	0.37	0.751	1.04	-0.462	0.00648	-0.212	-0.0748	-0.058	0.173	-0.114	1.73	-0.0238	-0.0964	0.21	0.0675	0.0277	0.00728
3HIDH_HUMAN	HIBADH	0.0273	-0.232	-0.158	-0.0466	0.35	0.0758	0.1	0.4	0.0305	0.46	-0.0183	-0.308	0.0941	-0.473	0.0175	0.238	0.196	0.062	0.17	-0.0434	0.118	-0.00572	-0.292	0.418	-0.143	-0.0938	0.0286	-0.234	-0.226	-0.0399
4F2_HUMAN	SLC3A2	-0.0179	0.0666	-0.0654	0.127	0.0205	-0.122	0.226	0.248	-0.111	0.277	-0.0138	-0.114	-0.0536	0.153	0.00859	0.138	-0.0217	0.0648	0.239	-0.0597	-0.0778	0.00148	0.0301	0.239	0.0342	-0.255	0.0666	0.0666	0.00157	-0.00492
5NTD_HUMAN	NT5E	0.00569	-0.134	-0.223	0.0882	0.0184	-0.127	0.267	-0.154	0.0562	0.128	0.187	0.167	-0.11	0.0943	0.0395	-0.231	-0.381	-0.0731	0.0166	-0.053	0.233	0.118	0.056	-0.00378	0.0286	-0.082	-0.117	-0.0731	-0.207	-0.141
6PGD_HUMAN	PGD	-0.0413	-0.211	-0.0214	-0.115	0.127	-0.000227	-0.00886	0.629	-0.218	1.41	0.0603	0.501	-0.559	-0.19	0.0311	0.64	-0.0113	-0.261	-0.381	-0.135	0.242	0.18	0.107	1.09	0.299	-0.48	0.11	-0.139	-0.374	-0.179
6PGL_HUMAN	PGLS	0.0337	0.0392	-0.163	0.113	0.135	0.0641	0.0254	0.433	0.141	0.684	-0.0704	0.144	-0.409	-0.0669	0.0224	0.823	-0.178	-0.045	-0.135	0.0117	0.15	0.00926	0.0345	0.64	0.0526	-0.175	0.00532	-0.0766	-0.169	0.0259
7B2_HUMAN	SCG5	0.0275	0.152	0.539	-0.175	-0.0144	0.233	-0.179	-0.272	-0.0625	-0.389	-0.182	0.173	0.168	-0.383	-0.0347	-0.048	0.0327	0.469	-0.0524	-0.095	-0.504	0.0818	0.116	-0.0517	-0.283	0.145	-0.153	0.122	-0.044	0.0976
A1AG1_HUMAN	ORM1	-0.131	-0.403	0.786	-0.124	0.335	0.418	1.79	-0.169	0.242	0.76	-0.319	2.04	-0.86	0.413	-0.0977	-0.247	-0.286	-0.819	-0.15	0.00168	2.23	0.426	0.757	0.315	2.17	-0.344	-0.25	-0.471	-0.378	-0.0186
A1AG2_HUMAN	ORM2	-0.298	-0.802	-0.422	0.553	0.729	-0.356	1.84	-0.507	0.0377	-0.757	2.49	0.757	-1.15	0.627	-0.189	-0.173	-0.495	-0.948	-0.21	0.319	2.16	0.452	0.31	0.267	2.4	-0.281	-0.293	-0.337	-0.173	-0.028
A1AT_HUMAN	SERPINA1	-0.232	-0.347	0.354	0.0598	-0.0262	0.326	1.99	0.0491	-0.11	0.77	1.01	0.125	-0.232	0.323	-0.515	0.102	0.932	-0.841	0.19	0.534	2.83	0.637	-0.144	-0.0847	1.52	-0.129	-0.142	0.0224	-0.0925	-0.167
A1BG_HUMAN	A1BG	0.212	-0.447	0.353	-0.502	0.464	0.416	0.153	-0.977	0.184	-0.346	0.246	0.782	-0.921	-0.117	-0.338	-0.431	0.11	-0.351	-0.496	0.393	0.737	0.542	0.234	-0.00407	0.709	-0.882	-0.538	-0.0762	-0.666	-0.105
A2AP_HUMAN	SERPINF2	0.027	-0.352	0.13	-0.189	0.672	-0.101	0.449	-0.32	0.162	-0.205	0.465	0.444	-0.533	0.222	-0.216	-0.161	-0.205	-0.585	0.152	0.0687	0.819	0.257	0.209	0.0088	0.716	-0.571	0.0182	-0.0721	-0.425	-0.2
A2GL_HUMAN	LRG1	0.1	0.0899	0.309	-0.484	-0.00556	0.306	0.316	-0.737	0.431	-0.405	0.247	0.896	-0.61	0.0432	-0.0544	-0.0939	-0.108	-0.268	-0.144	-0.794	0.186	0.855	0.0278	-0.00989	0.731	-0.305	-0.367	-0.0176	-0.662	-0.0687
A2MG_HUMAN	A2M	-0.029	-0.154	0.997	0.0325	-0.115	0.873	0.154	0.0632	-0.149	0.262	0.423	0.436	0.171	0.273	0.0399	-0.158	-0.0962	-0.0726	-0.449	0.411	1.43	0.235	-0.185	-0.0412	0.231	-0.103	-0.109	-0.0252	0.364	0.094
A4_HUMAN	APP	0.155	-0.00217	-0.184	0.183	-0.22	0.0438	0.293	-0.352	-0.11	-0.184	0.0147	0.124	0.282	-0.0784	0.13	-0.192	0.0778	0.164	0.244	-0.501	-0.326	-0.333	0.152	-0.0618	-0.374	0.481	0.181	-0.0369	0.342	-0.286
A4GAT_HUMAN	A4GALT	0.0543	0.297	-0.202	-0.0105	-0.00205	-0.0562	0.519	-0.00329	0.0364	-0.33	0.0963	0.387	-0.00733	-0.0372	-0.015	-0.0137	-0.0982	0.197	-0.174	-0.267	0.279	0.181	0.0808	-0.203	0.129	-0.196	0.136	0.0913	-0.171	-0.0464
AACT_HUMAN	SERPINA3	-0.0779	0.0654	-0.0828	0.124	0.435	-0.357	0.28	-0.272	-0.0804	-0.248	0.471	0.142	-0.697	0.242	0.0648	-0.268	0.126	-0.475	0.0719	-0.0505	0.553	-0.0465	0.363	-0.166	0.79	-0.324	-0.108	0.000681	-0.241	-0.0602
AAMDC_HUMAN	AAMDC	0.255	-1.61	0.275	-0.267	0.125	0.408	-0.131	0.0844	-0.0806	-0.0492	0.101	0.131	0.367	-0.189	0.533	-0.621	0.00601	-0.65	-0.137	-0.305	0.439	-0.108	-0.285	-0.133	0.202	-0.0533	0.238	0.288	-0.85	0.269
AATC_HUMAN	GOT1	0.136	0.11	-0.118	0.021	-0.16	0.0575	-0.195	-0.017	-0.0725	-0.118	-0.0375	-0.163	0.187	-0.111	-0.0228	-0.0258	0.0408	0.0228	0.116	0.223	-0.335	-0.0533	-0.0924	-0.0342	-0.173	0.0685	-0.0834	0.0291	0.184	0.0695
AATM_HUMAN	GOT2	-0.0295	-0.0968	-0.147	0.16	-0.0894	-0.317	-0.0912	0.138	0.0142	0.18	-0.00556	-0.185	-0.0664	0.054	0.237	0.164	0.117	-0.133	0.016	0.0603	-0.113	-0.186	-0.266	-0.0732	-0.158	0.237	0.0539	0.104	0.236	-0.0789
ABHEA_HUMAN	ABHD14A	-0.0793	-0.0654	0.228	-0.15	-0.0352	-0.0247	0.0358	-0.00471	0.05	0.105	-0.111	0.00386	-0.0749	-0.0729	-0.166	0.0334	-0.125	0.0649	0.218	0.137	0.242	-0.134	-0.301	0.00782	0.0833	0.0838	0.00443	0.0417	-0.0659	-0.045
ABHEB_HUMAN	ABHD14B	0.00751	0.131	0.0461	0.142	-0.0776	-0.066	-0.0739	0.33	-0.217	0.0109	0.00235	-0.203	-0.0993	0.174	0.0047	0.266	-0.232	-0.272	0.0496	0.0761	0.147	0.126	-0.251	0.598	0.101	0.0437	0.0687	-0.0287	-0.135	-0.0117
ACBP_HUMAN	DBI	-0.141	-0.0862	-0.393	0.29	-0.114	-0.431	0.176	0.589	-0.366	0.478	0.189	-0.541	-0.168	0.536	-0.0712	-0.197	0.0342	-0.225	0.493	0.312	0.00259	-0.403	0.188	0.243	0.296	-0.142	-0.255	0.183	0.445	-0.063
ACE_HUMAN	ACE	0.0598	0.0526	-0.131	-0.0322	0.0653	0.123	-0.0701	-0.367	-0.0955	-0.0529	0.214	0.174	-0.106	0.134	0.198	-0.0551	-0.0851	0.00552	-0.133	-0.176	-0.221	-0.089	0.103	-0.188	0.0601	0.236	0.105	-0.000993	0.102	0.125
ACES_HUMAN	ACHE	0.00523	-0.0508	-0.113	-0.000602	0.0351	-0.0754	0.0581	0.294	-0.0611	0.47	-0.0966	-0.0229	-0.202	-0.125	0.091	0.0854	0.105	0.21	0.00608	-0.26	0.0362	0.0285	0.114	0.079	-0.11	-0.123	0.0645	-0.123	0.125	-0.193
ACOC_HUMAN	ACO1	-0.0374	-0.245	-0.0678	-0.0137	0.0695	0.129	0.115	0.0217	-0.265	-0.111	-0.496	0.128	0.0284	-0.181	0.12	0.00134	-0.0507	0.0534	-0.184	0.242	0.102	0.106	-0.271	0.164	-0.35	-0.388	-0.0408	-0.299	-0.336	-0.202
ACPH_HUMAN	APEH	-0.11	-0.462	0.533	0.342	0.759	0.000902	-0.277	1.69	-0.175	2.62	0.135	1.05	-0.205	0.169	0.0586	2.12	-0.51	0.162	-0.214	-0.324	0.162	-0.185	-0.403	2.59	0.187	-0.548	0.55	-0.333	-0.185	-0.42
ACTB_HUMAN	ACTB	-0.0402	0.0512	-0.0519	0.112	0.365	0.0335	-0.0628	0.325	-0.212	0.714	0.0132	0.593	-0.158	0.346	0.212	0.0728	-0.147	-0.062	-0.216	-0.0906	0.193	-0.0269	0.108	0.557	0.486	-0.337	-0.127	0.174	-0.0663	-0.0523
ACTN3_HUMAN	ACTN3	0.287	-0.119	0.463	-0.127	0.216	0.0328	0.17	-0.0872	0.173	0.353	-0.12	0.227	-0.293	0.596	0.442	0.036	-0.117	-0.16	-0.0845	-0.0863	0.152	-0.0421	-0.122	0.393	0.429	-0.29	0.0424	-0.118	0.237	-0.191
ACTN4_HUMAN	ACTN4	-0.0718	-0.0926	-0.134	-0.121	0.401	0.0209	-0.161	0.558	-0.229	1.09	-0.317	-0.277	-0.196	0.518	0.576	-0.389	-0.168	0.213	-0.437	-0.116	-0.00436	0.0913	0.261	0.275	0.178	-0.0849	0.277	-0.258	-0.00833	-0.33
ACTS_HUMAN	ACTA1	-0.0749	-0.0061	0.104	-0.265	0.0865	0.00969	0.0759	-0.0489	0.0135	0.541	0.0276	0.395	-0.461	0.0532	0.251	0.0925	-0.216	-0.0536	-0.188	-0.0844	0.0466	-0.118	0.0828	0.612	0.25	-0.457	-0.219	-0.00601	-0.127	-0.0208
ACY2_HUMAN	ASPA	0.0658	0.271	0.0211	-0.283	-0.0505	-0.139	-0.794	0.00157	0.268	0.236	0.137	-0.117	-0.253	0.657	0.556	0.117	-0.0669	-0.168	-0.49	-0.0259	0.618	-0.392	-0.103	0.00821	0.242	0.157	0.0713	-0.459	0.135	-0.127
ACYP2_HUMAN	ACYP2	-0.075	0.153	-0.177	-0.0636	0.146	-0.0558	0.057	0.201	-0.156	0.358	-0.03	-0.572	0.101	0.0675	-0.0961	0.038	0.14	-0.139	0.143	0.0533	0.102	-0.0358	-0.0453	0.245	0.144	-0.32	-0.122	0.00998	0.159	-0.125
ADA_HUMAN	ADA	-0.104	0.176	0.407	-0.291	-0.192	0.42	0.0359	0.0875	0.0628	0.571	-0.28	-0.121	0.413	-0.0662	0.0581	-0.047	-0.0949	-0.122	-0.108	0.141	-0.0692	0.0766	0.367	-0.0855	-0.05	0.208	-0.057	0.282	-0.0609	0.0242
ADA10_HUMAN	ADAM10	-0.154	-0.0089	-0.0406	0.145	-0.0562	-0.245	-0.0212	0.183	0.0667	0.0563	0.118	-0.177	-0.172	0.172	-0.0981	0.018	-0.137	-0.0314	0.146	0.0238	0.219	-0.0179	-0.0625	-0.00461	0.215	0.0204	-0.0516	0.0393	0.0192	-0.175
ADA11_HUMAN	ADAM11	-0.0073	-0.131	-0.0361	0.247	-0.109	0.0221	-0.00583	-0.0917	0.0968	-0.0296	0.241	-0.274	0.177	0.0318	0.0466	-0.0661	0.0319	-0.0332	0.322	0.0971	-0.189	-0.105	-0.0659	0.0888	-0.107	0.149	-0.155	0.0445	0.267	0.199
ADA15_HUMAN	ADAM15	-0.369	-0.366	-0.235	0.00575	0.0592	-0.466	0.186	0.246	-0.196	0.205	0.186	-0.029	-0.346	0.143	-0.325	-0.229	-0.209	-0.321	-0.158	0.133	0.511	0.00499	-0.0289	0.0589	0.254	0.0302	-0.102	-0.0842	-0.353	-0.0445
ADA17_HUMAN	ADAM17	-0.0739	-0.105	0.0126	-0.243	-0.141	-0.0191	0.299	0.138	-0.0469	0.132	-0.0385	-0.433	0.0881	0.0859	0.0649	-0.0415	0.0411	0.0723	0.0349	-0.0601	0.344	0.0934	0.0674	-0.0942	0.214	-0.105	-0.179	-0.083	-0.00121	0.057
ADA22_HUMAN	ADAM22	0.0774	0.0293	0.25	-0.0511	-0.147	0.265	-0.0638	-0.0626	-0.0453	-0.119	-0.0528	-0.207	0.206	-0.0371	0.103	-0.207	0.105	0.114	0.24	0.0696	-0.348	-0.00798	0.0719	-0.114	-0.0647	0.147	-0.0223	0.172	0.13	-0.105
ADA23_HUMAN	ADAM23	-0.115	0.101	0.0363	-0.0252	-0.0645	0.151	-0.114	-0.1	0.1	-0.372	-0.119	0.00547	0.232	-0.0988	0.0708	0.0905	0.102	0.0745	0.0597	-0.155	-0.4	-0.0224	-0.0586	-0.155	-0.378	0.182	-0.0127	0.0377	-0.0317	0.0571
ADA28_HUMAN	ADAM28	-0.283	0.111	-0.125	0.608	0.0108	-0.376	0.0223	0.0797	0.0779	-0.468	0.184	-0.515	-0.368	0.621	-0.056	0.0167	0.123	0.184	0.0707	0.328	0.297	0.35	-0.196	-0.138	-0.02	0.306	-0.163	0.181	-0.175	0.542
ADAM9_HUMAN	ADAM9	-0.0948	0.228	-0.0166	0.0253	-0.0497	-0.0893	0.00106	0.141	-0.19	0.249	0.0972	-0.411	0.0112	0.333	-0.0248	-0.0815	-0.0625	-0.177	0.348	0.207	0.135	0.148	0.0851	-0.276	0.363	-0.141	-0.3	0.373	0.159	0.0377
ADEC1_HUMAN	ADAMDEC1	0.246	-0.11	0.0144	-0.494	0.394	-0.26	0.0314	-0.0587	0.316	-0.736	-0.714	0.641	-0.0135	-0.509	0.327	0.23	0.275	-0.0974	-0.0704	0.0804	-0.153	-0.549	-0.255	-0.49	0.143	-0.073	0.108	0.48	-0.224	-0.0331
ADHX_HUMAN	ADH5	-0.237	-0.496	0.315	0.0169	0.231	0.0352	-0.614	1.03	-0.451	1.33	-0.807	0.579	-0.78	1.07	1.27	-0.15	-0.0889	-0.131	-0.555	0.0539	0.898	0.368	0.1	1.53	-0.0591	-0.365	0.513	-0.119	-0.581	-0.0626
ADIRF_HUMAN	ADIRF	-0.551	0.0676	0.278	0.269	0.651	-0.768	0.531	-0.145	0.642	-0.239	0.154	-0.00704	-0.642	0.792	0.776	-0.39	-0.265	-0.0416	-0.0337	0.504	1.28	-0.288	-0.231	0.628	-0.0177	-0.368	0.53	-0.0862	-0.0837	-0.0115
ADML_HUMAN	ADM	-0.0728	0.142	0.364	-0.183	0.016	-0.0278	0.0801	-0.124	0.237	-0.523	-0.0761	0.0556	-0.0915	0.294	0.39	-0.0347	-0.0601	-0.0852	-0.191	0.249	0.271	0.302	-0.0454	-0.185	0.0172	-0.0491	-0.074	0.0147	-0.276	0.166
ADPGK_HUMAN	ADPGK	-0.326	-0.25	-0.831	0.0129	-0.345	-0.697	-0.195	0.543	-0.314	0.857	0.705	-0.289	-1.02	0.342	0.0477	-0.369	0.123	-0.279	0.0453	-0.0179	0.0915	0.522	-0.00393	0.0502	0.0184	-0.342	-0.165	-0.367	0.0419	-0.0921
ADSV_HUMAN	SCIN	-0.00387	0.158	0.401	-0.697	0.0991	0.324	0.226	-0.612	0.182	-0.507	-0.394	0.62	-0.281	-0.856	0.0976	-0.0514	0.0544	0.361	-0.444	-0.246	0.0705	0.338	0.000841	-0.155	0.128	-0.542	-0.31	-0.132	-0.513	0.251
AEBP1_HUMAN	AEBP1	0.136	-0.0482	0.345	-0.0838	-0.197	-0.0692	0.165	-0.147	0.308	-0.356	-0.121	0.114	-0.0449	-0.228	0.168	-0.189	-0.051	0.25	0.121	0.224	0.289	0.404	-0.0959	-0.295	-0.158	0.107	0.207	0.146	-0.118	0.00347
AFAM_HUMAN	AFM	-0.0976	-0.293	0.0993	-0.085	0.794	0.304	0.928	-0.206	0.237	-0.342	0.528	1.2	-0.657	0.0337	-0.0257	-0.0654	0.0232	-0.346	-0.049	0.556	1.27	0.546	0.562	0.0544	0.798	-0.519	-0.145	0.0802	-0.258	0.139
AGAL_HUMAN	GLA	-0.0186	0.0821	-0.025	-0.0656	0.0168	0.0313	0.00137	0.108	-0.00605	-0.158	-0.0353	-0.0369	0.0806	-0.0504	-0.113	-0.0164	0.00731	0.0739	-0.0756	0.0986	0.0134	0.0572	-0.00181	0.00111	0.0704	0.0648	0.126	-0.0762	0.0136	-0.0661
AGRB3_HUMAN	ADGRB3	-0.052	0.0262	-0.166	0.195	0.0427	-0.147	-0.167	0.0615	-0.314	0.358	-0.0218	-0.316	0.245	0.0843	0.019	-0.143	0.241	-0.121	0.146	-0.225	-0.232	-0.213	0.00543	0.208	-0.38	0.284	0.153	-0.0176	0.272	-0.132
AGRG1_HUMAN	ADGRG1	-0.274	-0.0188	-0.0981	0.282	0.0606	-0.262	-0.104	-0.339	0.00366	-0.169	-0.079	-0.314	-0.324	0.28	0.122	0.0527	0.15	0.117	-0.172	0.0922	0.451	0.047	0.026	-0.171	-0.0806	-0.0596	0.159	0.0598	-0.0392	-0.0731
AGRIN_HUMAN	AGRN	-0.0523	0.0703	0.133	-0.266	0.0507	0.0163	0.0224	-0.294	0.0512	-0.0563	-0.0846	0.301	-0.0944	-0.165	-0.0511	-0.0719	0.0876	0.21	-0.113	0.0144	-0.232	0.069	0.0381	0.235	-0.106	-0.173	0.054	-0.0477	-0.302	0.0328
AGRL1_HUMAN	ADGRL1	-0.016	0.112	0.0921	-0.104	-0.123	0.197	-0.256	-0.143	0.0367	0.0188	-0.109	-0.236	0.18	-0.0792	-0.0192	-0.0841	0.146	0.0412	0.0915	-0.0461	-0.233	-0.135	-0.0451	0.0362	-0.33	0.107	-0.0702	0.0645	0.109	0.0492
AGRL2_HUMAN	ADGRL2	0.145	-0.0806	-0.128	0.00492	-0.035	0.0606	-0.341	0.153	0.182	0.0461	-0.192	0.249	0.132	-0.133	-0.00909	0.166	0.0711	0.18	-0.113	-0.248	-0.335	0.0515	0.0351	-0.164	-0.324	0.196	-0.0569	-0.00448	0.132	-0.046
AGRL3_HUMAN	ADGRL3	0.105	0.26	-0.17	-0.0319	-0.0837	-0.0542	-0.0133	-0.0453	0.00466	0.167	-0.0579	-0.354	0.164	0.0623	-0.0901	0.0427	0.229	-0.04	0.0797	-0.161	-0.367	-0.0336	-0.0706	0.4	-0.384	0.0503	0.0329	0.115	0.0614	-0.166
AIF1_HUMAN	AIF1	-0.236	-0.472	-1.08	-0.385	0.499	-0.346	0.281	0.397	-0.0564	1.12	-0.2	-0.944	-0.527	1.24	NA	0.631	0.755	0.406	0.676	-0.492	1.14	0.309	-0.302	0.708	0.691	-0.0932	-0.302	-0.31	-0.286	0.0549
AJAP1_HUMAN	AJAP1	-0.0471	0.131	0.0126	0.129	-0.0191	0.263	-0.219	-0.133	0.0734	-0.509	-0.0641	0.0451	0.351	-0.212	-0.306	0.0739	-0.13	0.115	0.0319	0.0538	-0.431	0.0629	-0.0598	-0.207	-0.33	0.242	0.0339	-0.135	-0.03	0.149
AK1A1_HUMAN	AKR1A1	-0.334	-0.195	-0.144	-0.373	0.269	-0.0401	0.035	-0.12	0.292	0.287	-0.15	-0.08	-0.185	0.3	0.344	0.0697	-0.223	-0.114	0.0358	0.0228	0.159	0.0554	0.0616	0.476	0.178	-0.0846	0.0118	0.153	0.0482	-0.356
AK1C1_HUMAN	AKR1C1	-0.319	-0.102	0.748	0.206	-0.0808	-0.0376	-0.246	1.11	0.00806	0.959	-0.334	0.361	-0.595	0.583	1.42	0.175	0.0661	-0.0897	-0.0978	-0.312	1.02	0.399	-0.177	1.15	0.208	-0.518	0.222	-0.486	0.0105	-0.0143
AL1A1_HUMAN	ALDH1A1	0.105	-0.0299	0.219	0.0522	0.0184	0.0581	0.129	0.674	-0.0162	1.3	0.062	-0.271	0.0227	0.0398	-0.255	0.739	0.0539	0.133	0.56	-0.338	-0.0878	-0.204	-0.0996	1.29	0.0216	-0.105	0.0533	0.0669	0.331	-0.178
ALBU_HUMAN	ALB	-0.153	-0.199	1.13	-0.279	-0.134	0.989	3.22	-0.235	0.236	0.154	0.126	1.29	1.47	-0.75	0.249	0.646	1.03	0.185	-1.17	-0.0469	4.16	0.712	-0.628	-0.0582	2.02	-0.0618	-0.147	-0.373	-0.0491	-0.0032
ALDOA_HUMAN	ALDOA	0.0139	0.115	0.0362	-0.186	-0.0559	0.123	-0.448	-0.0349	0.0145	-0.0263	-0.114	-0.134	0.221	-0.554	0.111	0.09	0.0408	0.0891	-0.0817	0.0863	-0.376	-0.0511	-0.254	0.032	-0.285	0.114	0.0643	0.0682	0.0855	-0.000821
ALDOB_HUMAN	ALDOB	0.0739	-0.683	-0.466	0.0355	0.897	-0.362	-0.0673	-0.0402	-0.099	-0.675	-0.0139	-0.337	0.0735	-0.201	0.354	0.122	0.205	0.429	0.395	-0.0154	0.507	0.0385	0.382	-0.0404	0.281	-0.633	0.00661	-0.254	-0.218	-0.157
ALDOC_HUMAN	ALDOC	0.201	0.14	0.312	-0.17	-0.0835	0.138	-0.0508	-0.111	0.0463	-0.296	0.0113	-0.17	0.136	-0.256	0.0987	-0.0448	0.109	0.34	0.000275	-0.00456	-0.447	-0.0388	-0.131	0.013	-0.085	-0.0461	0.0419	0.129	0.0171	0.172
ALDR_HUMAN	AKR1B1	-0.019	-0.00278	0.37	-0.0596	0.146	0.125	-0.0932	0.395	-0.283	0.0338	0.0941	-0.187	0.0901	0.676	0.289	-0.0908	0.032	-0.123	0.17	-0.0279	-0.0191	-0.0484	-0.105	0.674	0.128	-0.275	-0.212	-0.125	0.0465	-0.17
ALS_HUMAN	IGFALS	-0.0299	-0.373	-0.193	-0.125	0.711	0.508	0.394	-0.138	0.657	0.329	0.608	0.824	-0.745	0.0838	-0.113	0.118	-0.0836	-0.227	0.107	-0.0754	0.855	0.471	0.152	0.294	0.808	-0.346	0.015	0.106	-0.409	-0.265
AMBP_HUMAN	AMBP	0.0736	-0.302	0.549	-0.771	0.339	0.505	0.466	-0.881	0.298	-1.01	0.0677	1.17	-0.621	-0.211	-0.298	-0.385	-0.0089	-0.294	-0.302	0.214	0.84	0.455	0.00851	-0.0818	0.741	-0.766	-0.0706	-0.0108	-0.986	-0.0646
AMD_HUMAN	PAM	-0.0239	0.133	-0.128	-0.0263	0.0242	0.0314	-0.559	0.0579	0.0256	-0.0899	-0.0334	-0.335	0.234	0.098	-0.122	-0.14	-0.0221	-0.0409	0.116	0.127	-0.454	-0.0995	-0.129	-0.0872	-0.263	0.27	-0.129	0.0878	0.199	0.0126
AMGO2_HUMAN	AMIGO2	0.182	0.00597	0.143	-0.152	0.144	0.0553	-0.0311	0.104	0.149	-0.213	-0.291	0.0734	-0.0311	-0.14	0.0207	-0.0612	0.0234	-0.0865	-0.383	0.331	-0.0904	0.172	0.0641	-0.00374	-0.27	0.104	-0.105	0.0463	-0.272	0.352
AMPL_HUMAN	LAP3	0.22	-0.0213	-0.116	0.304	0.159	-0.124	0.0929	0.256	-0.136	0.292	0.142	0.097	0.0786	-0.0765	0.18	-0.0964	0.164	-0.261	-0.0753	-0.122	0.215	0.0174	-0.116	0.258	0.392	-0.0889	0.219	0.0405	0.165	-0.173
AMPN_HUMAN	ANPEP	-0.00693	0.107	-0.0739	0.127	0.177	-0.0013	0.541	-0.173	-0.136	-0.144	0.0434	0.287	0.0763	0.00062	0.00353	-0.188	0.0045	-0.328	-0.0652	0.454	0.487	0.317	0.159	-0.0454	0.429	-0.189	-0.0414	0.0468	-0.116	0.00304
AMY2B_HUMAN	AMY2B	0.11	0.0282	0.153	-0.221	-0.00613	-0.0405	0.192	-0.14	0.174	-0.293	-0.0582	0.0984	0.0551	-0.255	0.0679	-0.144	0.276	0.00489	0.259	0.144	-0.0523	0.0426	-0.00527	-0.0958	0.19	-0.192	-0.0566	0.264	-0.0762	0.00467
ANAG_HUMAN	NAGLU	0.245	0.303	0.312	-0.312	-0.000594	-0.0386	0.138	-0.273	-0.0575	-0.306	-0.132	0.101	0.0777	-0.157	-0.0365	-0.0959	0.43	0.255	-0.24	-0.0103	-0.0953	0.187	-0.318	-0.0616	0.108	0.0869	0.156	-0.115	-0.241	0.103
ANFB_HUMAN	NPPB	-0.304	0.335	0.272	-0.143	-0.281	-0.0744	-0.153	0.0421	0.172	-0.243	0.12	-0.106	0.249	-0.276	0.114	-0.24	-0.0121	0.14	0.0447	-0.0863	0.159	-0.121	-0.0534	-0.134	-0.0782	0.113	0.173	-0.0762	0.158	0.0777
ANFC_HUMAN	NPPC	-0.003	0.0171	0.465	-0.28	0.157	0.213	0.0223	-0.111	-0.0495	-0.376	-0.176	-0.195	0.105	-0.0816	-0.0274	-0.0436	0.0407	0.48	0.0864	0.215	-0.346	-0.0899	-0.0189	-0.0637	-0.13	0.234	0.052	0.131	0.037	0.408
ANGI_HUMAN	ANG	0.224	-0.365	-0.13	0.0423	-0.0919	-0.635	0.607	0.0847	0.418	-0.348	-0.317	0.336	-0.132	0.271	-0.246	-0.408	-0.177	-0.431	0.333	0.175	0.695	-0.302	0.046	-0.33	0.8	0.0209	-0.116	0.0669	-0.163	0.00668
ANGL1_HUMAN	ANGPTL1	-0.18	0.189	0.0674	0.0137	-0.162	-0.106	0.153	-0.0372	-0.189	0.379	0.0416	-0.171	0.134	-0.239	-0.0536	0.24	-0.279	-0.0546	-0.0981	-0.00289	0.00354	0.288	0.161	-0.178	0.194	-0.0446	0.111	0.276	0.0501	-0.0641
ANGL2_HUMAN	ANGPTL2	0.0958	0.121	0.0366	-0.0339	0.12	0.119	0.0737	-0.0482	-0.0482	0.105	0.0203	0.0265	0.0482	0.0499	-0.0459	0.0527	-0.0971	-0.154	0.0108	0.153	-0.0228	0.0134	0.0871	-0.0764	0.245	-0.0192	-0.0128	0.0537	0.0956	0.0551
ANGL4_HUMAN	ANGPTL4	-0.286	-0.0446	0.137	-0.0622	-0.0726	0.141	0.314	-0.0171	-0.0341	0.0633	0.00683	-0.0556	-0.0567	-0.034	0.165	0.0524	-0.283	-0.048	0.125	0.238	0.166	0.261	-0.0373	-0.21	-0.0881	-0.372	0.178	0.0582	-0.271	0.106
ANGL7_HUMAN	ANGPTL7	-0.111	0.228	-0.294	-0.399	-0.0441	-0.596	0.569	0.324	-0.0224	-0.138	-0.0337	0.857	-0.478	0.541	-0.545	-0.0119	0.194	0.232	-0.449	-0.151	0.733	0.287	0.42	-0.0887	0.214	-0.273	-0.0753	0.122	-0.42	-0.00937
ANGT_HUMAN	AGT	-0.0632	-0.314	-0.267	0.0225	0.0497	-0.0671	0.126	0.115	-0.0124	0.403	0.179	0.0732	-0.324	0.0366	0.185	-0.132	0.402	-0.0862	-0.033	-0.27	0.0157	0.444	0.193	-0.284	-0.0156	0.134	-0.191	0.108	-0.149	-0.124
ANK1_HUMAN	ANK1	0.0297	-0.168	0.103	0.477	1.07	0.223	0.268	1.19	0.0306	2.49	-0.0446	1.49	-0.372	-0.287	-0.21	2.22	-0.211	0.335	-0.358	-0.3	0.0576	0.084	-0.376	2.78	-0.0208	-0.16	0.725	-0.188	-0.179	-0.145
ANT3_HUMAN	SERPINC1	0.16	-0.289	0.179	-0.17	0.519	0.122	0.561	-0.507	0.116	-0.951	0.4	0.662	-0.879	-0.325	-0.0847	-0.0252	0.0898	-0.328	0.0488	0.0872	0.936	0.145	0.173	-0.229	0.828	-0.582	0.033	0.148	-0.551	-0.179
ANTR1_HUMAN	ANTXR1	-0.00469	0.107	0.153	-0.227	-0.04	-0.101	0.165	-0.112	0.0929	-0.235	0.0147	-0.163	0.141	-0.0768	0.136	-0.168	-0.014	0.157	-0.0471	0.0295	-0.054	0.131	0.0365	-0.0848	0.125	-0.0732	-0.105	0.163	-0.0176	0.135
ANXA1_HUMAN	ANXA1	-0.204	-0.288	0.204	0.242	0.502	-0.0217	-0.232	0.772	-0.219	0.755	0.0254	0.155	-0.461	1.15	0.405	-0.294	-0.285	-0.202	-0.259	-0.0674	0.207	-0.0925	0.242	0.897	0.609	-0.139	-0.0367	0.0495	-0.119	-0.136
ANXA2_HUMAN	ANXA2	-0.171	-0.41	0.0922	0.0819	0.262	0.164	0.0429	0.757	-0.25	0.213	-0.261	-0.00648	-0.281	1.18	0.712	-0.326	-0.157	-0.186	0.0337	-0.189	0.462	0.00231	0.00797	1.12	0.467	-0.271	-0.0391	-0.131	-0.0701	-0.129
ANXA5_HUMAN	ANXA5	-0.375	-0.14	0.00862	0.223	0.173	-0.13	0.0556	0.624	-0.146	0.294	0.0319	-0.0767	-0.157	0.645	0.521	-0.213	-0.0083	-0.202	-0.23	0.163	0.279	-0.0878	-0.0119	0.816	0.17	-0.42	0.0657	-0.000903	0.0844	-0.229
ANXA6_HUMAN	ANXA6	-0.225	0.0278	-0.0384	-0.103	0.504	0.209	-0.179	0.595	-0.0615	0.566	-0.174	0.371	0.0813	0.151	0.683	-0.274	-0.182	-0.104	-0.295	-0.0568	0.634	0.518	0.29	0.491	0.64	-0.567	-0.0142	0.000739	-0.424	-0.235
AOC3_HUMAN	AOC3	0.0308	0.0709	0.178	-0.205	0.334	0.083	0.128	-0.48	0.379	-0.666	-0.332	0.474	-0.295	0.0442	-0.0588	-0.363	0.0766	-0.0994	-0.273	-0.125	0.505	0.0176	-0.0525	0.074	0.311	-0.42	-0.0386	0.172	-0.322	-0.0885
AP1B1_HUMAN	AP1B1	-0.28	0.223	-0.298	-0.518	0.105	0.247	-0.0102	0.298	0.191	0.557	-0.0267	0.0278	0.00197	-0.00819	-0.2	-0.0167	-0.256	0.251	0.333	0.115	-0.281	-0.00835	-0.261	0.342	0.0527	-0.0724	-0.0778	0.0749	0.194	-0.0154
AP2A1_HUMAN	AP2A1	-0.157	0.102	-0.184	0.16	-0.231	-0.184	-0.0168	0.287	0.00769	0.325	-0.145	-0.188	-0.0369	-0.0344	-0.159	-0.0113	-0.287	0.0509	0.2	-0.0698	0.333	-0.114	-0.0767	0.125	-0.0398	0.195	0.124	-0.0202	0.0216	-0.0588
AP2A2_HUMAN	AP2A2	-0.0256	-0.00504	0.0284	0.0274	-0.0184	0.185	-0.0781	-0.0171	-0.0367	0.109	-0.0572	-0.135	0.0645	0.00662	-0.00809	0.0209	0.012	0.124	0.0238	-0.171	-0.156	0.0078	-0.0956	0.0187	0.0477	-0.021	0.00423	0.111	-0.00731	0.0393
AP2B1_HUMAN	AP2B1	-0.0429	0.0306	-0.113	0.0618	-0.000548	-0.00583	-0.154	0.273	-0.0382	0.247	-0.0444	-0.0413	0.19	-0.0267	-0.212	0.0184	-0.13	-0.0337	0.0906	0.086	-0.26	-0.0928	-0.1	0.0819	-0.164	0.155	0.0237	0.0533	0.219	0.0253
APLP1_HUMAN	APLP1	0.0363	0.252	-0.127	0.112	-0.084	0.15	-0.225	-0.343	0.0136	-0.415	0.0802	-0.26	0.315	-0.158	-0.215	0.0668	-0.0175	0.15	-0.0124	-0.0619	-0.446	-0.104	-0.0269	-0.156	-0.512	0.296	0.0225	0.0429	0.141	0.0207
APLP2_HUMAN	APLP2	0.13	0.036	0.197	0.0398	-0.138	-0.0165	-0.182	-0.204	-0.127	0.0817	-0.0458	-0.0748	0.0615	-0.136	-0.0132	-0.199	0.0615	0.421	0.31	-0.311	-0.255	-0.362	0.0443	0.354	-0.317	-0.0186	0.105	-0.131	0.318	-0.354
APMAP_HUMAN	APMAP	-0.133	-0.178	-0.299	0.36	0.191	-0.0894	0.111	0.141	-0.15	0.317	0.231	0.00848	-0.246	0.319	-0.171	-0.184	-0.144	0.0431	0.268	-0.0451	0.15	-0.314	-0.286	0.144	-0.122	-0.0206	0.0583	0.233	0.166	-0.295
APOA1_HUMAN	APOA1	-0.123	-0.501	1.07	-0.0241	0.0636	0.638	1.59	-0.22	-0.0832	0.134	0.591	0.689	-0.242	0.587	-0.176	-0.503	-0.0218	-0.509	-0.606	0.386	2.33	0.541	-0.219	0.147	0.989	-0.309	-0.131	-0.201	0.124	-0.0628
APOA2_HUMAN	APOA2	0.14	-0.29	-0.0537	-0.158	0.0552	0.597	0.538	-0.195	-0.0184	-1.07	0.0547	1.22	-0.753	0.165	-0.298	-0.346	-0.38	-0.0274	-0.0244	0.711	0.643	0.224	0.738	0.339	0.458	-0.702	-0.0698	-0.161	-0.819	0.135
APOA4_HUMAN	APOA4	0.43	-0.226	0.361	-0.0392	0.505	-0.674	0.45	0.051	0.307	-0.988	0.0662	0.924	-0.892	-0.0769	0.0738	-0.0159	0.0537	-0.345	0.188	0.261	0.933	-0.277	0.266	0.0241	1.14	-0.322	-0.466	0.508	-0.397	-0.254
APOB_HUMAN	APOB	0.0186	-0.307	-0.0314	-0.0971	0.668	-0.0107	-0.0565	0.377	0.118	1.5	0.679	0.611	-0.424	0.597	-0.211	-0.0271	-0.266	-0.472	-0.487	0.606	0.773	-0.0592	0.77	0.832	0.831	-0.243	-0.12	-0.122	-0.198	-0.494
APOC1_HUMAN	APOC1	0.479	-0.455	0.435	-0.171	0.699	0.0387	-0.0423	-0.373	0.435	0.244	0.244	0.982	-0.525	-0.0472	0.475	0.352	-0.123	-0.53	-0.192	-0.443	0.973	-0.112	-0.707	0.851	0.405	-0.234	-0.00146	0.201	-0.537	-0.143
APOC2_HUMAN	APOC2	0.485	-0.0243	0.016	0.038	0.543	-0.19	-0.481	-0.207	0.0511	0.069	0.369	0.0503	-0.0976	0.713	0.181	-0.147	0.234	-0.511	-0.0421	0.429	-0.0543	-0.506	0.149	0.476	0.338	0.154	-0.0446	-0.033	-0.0758	-0.19
APOC3_HUMAN	APOC3	0.422	-0.221	-0.0921	-0.0849	0.582	-0.153	-0.369	-0.282	0.0256	0.241	0.334	0.0161	-0.316	0.305	0.235	-0.318	0.236	-0.399	0.0535	0.249	-0.345	-0.518	0.0361	0.282	0.605	0.0689	-0.257	0.232	-0.238	-0.205
APOD_HUMAN	APOD	0.13	0.332	-0.367	0.0504	-0.333	-0.701	0.728	0.464	0.0353	-0.334	0.0702	0.272	-0.0837	0.567	0.112	-0.247	-0.185	-0.115	-0.246	0.669	0.737	-0.362	0.342	-0.338	-0.191	0.423	0.354	0.3	-0.321	0.543
APOE_HUMAN	APOE	0.296	0.247	-0.0252	-0.177	-0.243	0.182	-0.0746	0.0102	0.00654	0.0988	0.067	-0.438	-0.03	0.267	-0.167	-0.158	-0.0441	0.364	0.202	0.386	-0.366	-0.364	0.186	-0.0312	0.0916	0.0198	-0.0647	0.201	0.227	0.282
APOF_HUMAN	APOF	0.0605	-0.447	-0.118	-0.0362	0.0976	0.1	0.28	0.231	0.248	0.158	0.207	-0.0791	-0.297	-0.106	-0.128	-0.304	0.142	0.154	0.023	-0.0501	0.495	0.244	-0.0812	0.343	0.419	-0.204	-0.206	0.00464	-0.0267	-0.038
APOH_HUMAN	APOH	0.148	-0.317	0.0812	-0.33	0.521	-0.0766	0.614	-0.324	0.0869	-1.31	0.172	0.992	-0.606	-0.0353	0.0998	-0.256	-0.135	-1.31	0.137	0.171	1.07	0.252	0.237	-0.184	0.931	-0.596	-0.0333	0.143	-0.609	0.0697
APOL1_HUMAN	APOL1	0.0464	-0.516	0.0275	0.0975	0.0107	0.294	-0.15	-0.232	0.0199	0.154	0.504	0.0349	-0.268	0.0865	-0.466	-0.15	-0.0127	-0.354	0.0315	0.24	0.372	0.472	0.064	0.117	-0.155	-0.356	-0.0903	-0.35	-0.272	-0.0236
APT_HUMAN	APRT	NA	NA	NA	0.136	0.469	NA	0.59	0.813	NA	1.62	0.5	0.355	-0.352	0.626	0.256	0.881	-0.111	0.15	0.273	0.216	0.695	0.301	-0.0455	1.51	0.848	-0.147	0.128	0.0717	0.106	0.0807
AQP4_HUMAN	AQP4	0.0543	-0.105	0.28	0.181	-0.204	-0.207	0.505	0.144	-0.0851	-0.0675	-0.284	0.194	0.136	-0.0264	-0.409	-0.0182	-0.217	-0.408	-0.197	0.295	0.167	-0.00161	0.398	0.0478	-0.166	-0.318	-0.145	0.00197	0.164	0.0867
ARL8B_HUMAN	ARL8B	0.0703	-0.021	0.157	-0.193	0.144	0.138	-0.317	-0.037	-0.0631	-0.187	0.238	-0.132	-0.0662	0.0492	0.124	-0.153	-0.0994	-0.197	0.239	0.00977	-0.254	-0.0881	0.1	-0.0639	0.0357	0.115	-0.0576	0.139	0.174	0.224
ARP3_HUMAN	ACTR3	-0.441	-0.212	-0.181	-0.0243	0.412	-0.512	-0.345	0.427	-0.424	0.703	0.193	0.119	0.0211	0.491	0.215	0.178	-0.387	-0.834	-0.179	0.102	0.153	-0.228	0.173	0.521	0.585	-0.241	-0.17	-0.0201	-0.114	-0.208
ARPC3_HUMAN	ARPC3	-0.121	0.0019	-0.35	0.0572	0.397	-0.115	-0.418	0.587	-0.307	0.516	0.051	0.46	-0.155	0.411	0.103	-0.393	-0.446	-0.061	-0.235	-0.116	0.269	-0.347	0.0314	0.619	0.545	-0.101	-0.0756	0.202	-0.012	-0.0166
ARPC4_HUMAN	ARPC4	0.0314	-0.133	-0.362	0.142	0.292	-0.133	-0.128	0.544	-0.0672	0.558	0.23	-0.0248	-0.0305	0.425	0.353	0.0401	-0.0607	-0.314	-0.309	0.145	0.189	-0.0186	-0.00952	0.462	0.478	-0.0274	0.229	-0.0857	-0.257	-0.156
ARPC5_HUMAN	ARPC5	-0.0527	-0.364	0.0124	-0.00464	0.326	-0.342	0.0289	0.246	-0.151	0.263	0.163	0.461	-0.329	-0.0386	-0.0333	-0.244	-0.323	-0.276	-0.0386	-0.15	0.217	-0.0183	0.0536	0.52	0.464	-0.37	0.00899	0.0106	0.0553	-0.28
ARSA_HUMAN	ARSA	-0.00895	0.0386	0.285	-0.334	-0.0307	0.118	0.117	-0.227	0.138	0.0584	-0.124	0.104	0.242	-0.123	0.324	-0.0612	0.515	0.032	-0.049	-0.182	-0.0219	-0.0849	0.162	-0.0844	-0.187	0.3	0.195	-0.0477	0.0235	-0.0112
ARSB_HUMAN	ARSB	0.117	-0.145	0.051	0.0457	-0.273	0.0442	0.0414	-0.232	-0.0957	0.224	-0.194	0.13	0.119	-0.231	0.0576	-0.0371	0.506	0.0518	-0.155	-0.18	0.105	0.235	0.0356	-0.0767	-0.0364	-0.0639	0.149	-0.127	-0.179	-0.158
ARSG_HUMAN	ARSG	0.0459	-0.0351	-0.0649	0.0348	0.00855	0.122	0.0296	0.342	-0.316	1.03	-0.345	-0.0239	-0.0598	-0.275	0.156	0.112	0.863	-0.19	0.2	-0.24	-0.0915	-0.0825	-0.0191	0.584	-0.349	-0.121	-0.0613	0.538	0.208	-0.0665
ASA2B_HUMAN	ASAH2B	0.129	0.0491	0.109	-0.311	-0.0812	-0.148	0.133	0.00863	0.0484	-0.00368	0.236	0.384	0.176	0.0331	0.25	-0.303	0.198	-0.0317	-0.0165	-0.0769	0.0451	0.444	-0.278	0.0516	-0.069	-0.134	0.118	-0.0422	-0.273	-0.099
ASAH1_HUMAN	ASAH1	0.0958	0.00128	0.272	-0.196	-0.106	-0.191	0.439	-0.297	-0.0414	-0.118	-0.0181	0.0792	0.0361	-0.021	0.23	-0.236	0.344	0.0322	0.0803	-0.222	0.0366	-0.0108	0.181	-0.298	-0.0224	-0.00353	0.0453	0.00357	0.142	-0.103
ASGL1_HUMAN	ASRGL1	0.341	0.14	0.0726	-0.201	0.336	0.361	0.163	-0.125	0.0676	-0.212	-0.0631	0.3	-0.0277	-0.583	0.208	0.274	0.151	0.0176	0.118	-0.103	-0.572	-0.00118	-0.145	0.599	-0.12	0.0359	-0.027	0.0502	0.187	-0.0918
ASGR2_HUMAN	ASGR2	-0.122	-0.699	-0.407	-0.0777	0.32	-0.348	0.356	0.0346	0.594	0.0977	0.408	0.00525	-0.272	0.29	0.337	-0.375	-0.753	-0.0644	-0.0795	-0.321	0.715	0.359	-0.232	0.18	0.647	-0.121	0.0693	-0.0985	-0.689	-0.0154
ASM_HUMAN	SMPD1	-0.103	0.0448	0.151	-0.244	-0.166	-0.311	0.251	-0.0432	0.0497	-0.152	-0.206	0.261	0.155	-0.187	-0.336	0.164	0.211	-0.0704	-0.137	-0.139	0.0707	0.123	0.169	-0.278	0.0194	0.128	0.214	0.0435	0.0365	-0.092
ASM3A_HUMAN	SMPDL3A	-0.194	-0.268	0.437	-0.689	-0.295	0.0608	0.0841	-0.464	-0.223	-0.272	0.0306	-0.2	-0.168	0.331	-0.109	-0.0553	0.0721	0.227	-0.273	0.0901	0.0888	0.11	0.0134	-0.164	-0.0575	0.266	0.186	-0.0427	-0.453	-0.297
ASM3B_HUMAN	SMPDL3B	-0.354	0.00309	-0.329	-0.151	-0.14	0.224	0.148	-0.0712	-0.442	0.526	0.357	-0.404	-0.155	0.268	-0.0611	0.165	0.536	0.0686	-0.358	-0.337	-0.281	-0.235	0.072	0.234	-0.0039	0.131	0.0593	-0.401	0.392	0.0788
ASPG_HUMAN	AGA	0.108	-0.034	0.309	-0.286	-0.159	0.125	0.379	-0.159	0.127	-0.0351	-0.239	0.288	-0.0152	-0.245	0.131	0.0441	0.556	0.238	-0.177	0.0923	0.32	-0.161	0.0984	-0.144	-0.0778	-0.189	0.268	0.00838	-0.34	-0.0842
ASPH_HUMAN	ASPH	-0.0274	0.0877	0.0389	-0.0357	-0.104	-0.17	0.199	-0.0181	0.00603	-0.0101	0.0584	-0.0951	-0.0793	0.095	0.00275	-0.0171	0.0849	-0.0205	0.261	-0.326	-0.025	-0.0221	0.158	0.114	0.118	-0.0602	-0.126	0.0615	0.0804	0.00463
ASTN1_HUMAN	ASTN1	-0.126	0.0934	-0.0519	-0.0529	-0.0404	0.157	-0.392	-0.036	0.00382	0.438	0.0894	-0.0208	0.129	-0.176	-0.0711	0.17	0.00371	0.0512	0.156	-0.205	-0.213	0.0807	-0.0728	0.194	-0.362	0.119	-0.153	-0.0737	-0.126	-0.194
ASTN2_HUMAN	ASTN2	0.154	-0.302	-0.0313	0.0387	-0.0571	-0.101	0.182	0.0359	-0.189	0.0557	0.0569	-0.332	-0.208	0.148	0.0315	-0.0536	0.0414	0.109	0.0936	-0.124	-0.0663	-0.218	0.045	0.152	0.251	0.0637	-0.108	0.0678	0.359	-0.0625
AT1A1_HUMAN	ATP1A1	0.205	-0.0536	0.123	-0.33	-0.144	0.245	-0.101	0.147	0.155	0.425	0.0411	0.306	0.253	-0.193	-0.153	-0.214	-0.146	0.2	-0.193	-0.25	-0.0116	0.555	-0.0921	-0.347	0.0691	-0.0625	0.0223	0.355	-0.305	0.188
AT1A2_HUMAN	ATP1A2	0.18	-0.0153	0.465	-0.292	0.186	0.176	0.088	-0.128	-0.086	-0.195	-0.163	-0.14	0.0651	0.176	-0.0629	0.0658	-0.15	-0.0895	0.432	0.0699	0.0419	0.0727	-0.201	-0.00445	-0.026	-0.139	0.0509	0.0209	-0.0338	0.35
AT1A3_HUMAN	ATP1A3	-0.0484	0.0252	-0.794	0.666	-0.195	-0.355	0.553	0.515	-0.404	0.0736	-0.216	-0.0554	-0.468	-0.197	-0.506	0.168	0.355	0.361	-0.114	-0.0174	0.317	0.034	0.307	-0.476	0.454	0.0675	-0.54	0.19	0.13	0.32
AT1B1_HUMAN	ATP1B1	-0.0922	0.0118	-0.0394	0.0748	0.0637	-0.12	0.0681	-0.0632	-0.033	-0.231	-0.00907	-0.254	0.187	0.169	-0.0606	-0.117	0.0294	-0.0626	0.0878	0.0528	0.0587	-0.176	-0.0263	-0.185	0.0496	0.0182	-0.082	0.011	0.2	0.132
AT1B2_HUMAN	ATP1B2	0.127	-0.0782	0.0534	0.0708	0.0402	-0.0195	-0.203	-0.224	-0.0646	-0.0665	0.254	-0.0146	-0.018	0.179	0.059	0.181	0.0191	-0.0729	0.0249	-0.207	0.185	-0.0723	-0.00592	0.049	-0.288	0.059	-0.0643	-0.122	-0.0397	-0.0177
AT1B3_HUMAN	ATP1B3	-0.105	0.0875	0.0417	-0.334	-0.106	0.173	0.171	0.185	0.18	-0.0373	-0.0266	0.0692	-0.0743	-0.256	0.0565	0.0946	-0.122	0.294	-0.0474	0.223	-0.00312	0.000561	-0.315	0.487	-0.0332	-0.108	-0.228	0.0361	-0.104	0.0895
AT2A1_HUMAN	ATP2A1	0.217	0.0262	0.22	-0.303	-0.0456	-0.226	-0.311	0.064	0.073	0.469	0.138	-0.0905	-0.412	-0.194	0.00271	-0.0726	0.237	0.108	-0.283	-0.0307	0.185	0.583	0.0636	0.0873	0.267	-0.37	0.184	0.0824	-0.0744	0.157
ATF6A_HUMAN	ATF6	-0.0712	0.0618	0.0937	0.00437	0.0727	0.146	0.418	-0.0577	-0.034	0.0477	0.0519	-0.0828	-0.00534	0.000242	0.321	0.237	-0.21	-0.0405	-0.0364	-0.0252	0.137	0.256	-0.0417	0.0547	0.19	-0.0632	0.137	-0.0814	-0.0975	-0.0241
ATF6B_HUMAN	ATF6B	-0.249	-0.0402	0.373	-0.171	-0.107	0.399	-0.0545	-0.115	-0.00198	-0.278	-0.311	0.0634	0.127	-0.268	-0.0116	0.0778	0.122	0.128	0.0737	0.0871	0.107	0.274	0.0166	-0.145	0.2	-0.17	-0.309	0.108	-0.158	-0.00471
ATIF1_HUMAN	ATP5IF1	-0.124	-0.239	-0.392	0.164	0.195	0.0576	-0.145	0.233	-0.168	0.128	-0.154	-0.123	-0.143	0.305	0.288	-0.229	-0.157	0.0103	-0.127	0.106	-0.032	-0.29	-0.0205	0.0339	0.00042	0.344	-0.0945	-0.0802	0.369	0.048
ATOX1_HUMAN	ATOX1	-0.142	-0.147	-0.696	0.23	-0.148	-0.257	-0.181	0.315	-0.197	0.22	0.0296	-0.652	-0.168	0.368	-0.392	0.123	-0.273	-0.483	0.061	0.233	-0.151	-0.359	0.189	0.42	-0.0942	0.0517	-0.129	0.136	0.331	0.0183
ATRN_HUMAN	ATRN	0.0748	-0.0789	-0.0716	0.0446	-0.0444	0.0526	0.202	-0.167	0.0299	-0.0779	0.0876	0.126	-0.146	0.0753	0.188	-0.151	0.122	-0.0949	-0.0375	0.257	0.34	0.169	0.1	-0.105	0.153	-0.119	-0.0356	0.112	-0.0223	-0.00915
ATS1_HUMAN	ADAMTS1	0.058	0.0934	-0.0335	-0.133	-0.266	-0.0101	0.0245	-0.0361	-0.368	0.0363	0.224	-0.0368	-0.0494	0.192	-0.111	0.0282	0.136	-0.0314	-0.0735	0.285	0.013	-0.0915	0.0882	0.125	0.11	-0.0475	-0.048	-0.0279	-0.376	0.0436
ATS2_HUMAN	ADAMTS2	-0.205	0.000592	0.281	-0.0981	-0.0837	0.0409	0.13	0.057	0.104	0.193	-0.148	-0.0799	-0.0682	0.213	0.0678	-0.0799	-0.148	0.236	0.00019	-0.000166	-0.0916	0.0122	-0.0767	0.396	0.149	-0.17	0.0149	-0.0225	-0.0252	0.173
ATS3_HUMAN	ADAMTS3	0.118	0.0334	0.0666	-0.0819	0.138	0.318	-0.12	-0.365	0.0739	-0.344	-0.104	0.0955	0.217	-0.183	-0.164	0.264	-0.151	0.268	-0.125	0.0321	-0.149	0.152	0.049	-0.0554	-0.311	0.155	0.00844	-0.112	-0.166	0.157
ATS4_HUMAN	ADAMTS4	0.115	-0.292	-0.248	0.0108	0.036	-0.0054	-0.233	0.207	-0.0539	-0.276	0.215	0.0376	0.328	0.0159	-0.0908	0.261	0.0112	-0.187	-0.225	-0.0932	0.0672	-0.0484	0.131	0.365	0.311	-0.0742	-0.282	0.231	0.0722	-0.11
ATS8_HUMAN	ADAMTS8	0.134	-0.0371	-0.336	-0.135	0.134	0.0546	-0.104	-0.33	0.288	0.0224	0.2	0.17	-0.17	-0.198	-0.177	0.141	-0.177	0.0196	-0.162	0.214	-0.288	0.178	0.385	-0.114	-0.21	0.231	0.0157	-0.0424	-0.0011	0.0472
AUGN_HUMAN	ECRG4	0.346	-0.0265	0.972	-0.896	-0.612	0.19	0.165	-0.243	0.306	-0.593	-0.972	1.09	0.267	-0.788	-0.011	-0.328	-0.101	0.848	-0.117	-0.336	0.109	0.151	-0.0399	-0.301	-1.67	0.068	0.295	0.197	-0.206	0.247
B2MG_HUMAN	B2M	0.0739	0.0507	0.35	-0.174	-0.0616	0.097	-0.102	-0.225	0.359	-0.638	-0.0134	-0.348	0.244	-0.262	0.0596	-0.223	0.177	0.415	-0.203	0.208	-0.0475	0.189	0.0983	-0.0671	-0.135	-0.0546	-0.169	0.133	-0.115	0.334
B3GA1_HUMAN	B3GAT1	-0.0654	-0.0526	0.0121	-0.154	0.094	0.224	-0.401	-0.0723	0.0617	-0.16	-0.224	-0.0168	0.123	0.119	0.0651	-0.153	-0.185	0.145	0.279	-0.127	-0.186	0.166	0.0862	0.0333	-0.193	0.0594	-0.0414	0.0882	0.173	-0.177
B3GA3_HUMAN	B3GAT3	0.00621	-0.0829	0.177	0.192	-0.0676	-0.0523	-0.054	0.0968	-0.00455	0.271	0.0501	-0.249	0.0486	0.184	-0.173	-0.0682	-0.095	0.048	0.224	-0.05	0.46	-0.13	-0.0824	-0.112	0.0353	-0.0658	-0.0304	0.0777	0.0291	0.115
B3GL1_HUMAN	B3GALNT1	0.0366	-0.0299	-0.0287	0.058	-0.0468	-0.108	0.0328	0.204	0.0501	0.416	-0.063	-0.0433	0.23	0.0184	-0.0256	-0.023	0.0848	-0.139	0.147	0.0667	-0.0403	-0.072	-0.00474	-0.0662	-0.016	0.244	0.0231	0.0945	0.167	0.0111
B3GN2_HUMAN	B3GNT2	0.0632	0.028	-0.0384	0.0353	-0.05	-0.114	0.0127	-0.00759	0.138	-0.248	0.0903	-0.0853	0.198	0.0234	-0.0811	-0.0734	0.042	0.0991	-0.0614	0.000508	-0.118	-0.0534	-0.102	-0.117	-1.82e-05	0.0838	0.0215	0.0106	0.0473	0.178
B3GN7_HUMAN	B3GNT7	0.00636	0.193	0.0906	0.124	-0.0968	-0.0213	-0.0436	-0.231	-0.0381	0.186	-0.0894	0.245	0.0623	-0.151	0.00479	-0.0402	0.135	0.113	-0.365	-0.0806	0.171	0.192	-0.261	-0.0266	0.118	-0.226	0.0971	-0.131	-0.21	-0.0948
B3GN8_HUMAN	B3GNT8	-0.0654	-0.08	-0.0901	-0.108	0.228	0.125	0.484	-0.312	0.0756	-0.25	0.00203	-0.123	-0.18	0.0249	-0.0557	-0.226	0.0716	0.0557	-0.307	0.993	0.565	0.292	0.028	-0.058	0.0243	-0.112	0.103	-0.0602	-0.274	0.16
B3GN9_HUMAN	B3GNT9	0.0242	-0.0193	0.0329	-0.105	0.0144	-0.31	0.165	-0.11	0.218	-0.296	0.0103	-0.0828	0.169	-0.123	0.13	-0.0312	-0.00398	0.143	-0.017	-0.335	0.14	0.0613	0.0702	-0.0262	-0.177	0.0991	0.145	0.0443	-0.236	0.0901
B4GA1_HUMAN	B4GAT1	0.112	0.142	0.185	-0.00367	-0.0982	0.127	-0.1	-0.036	-0.00357	-0.341	-0.0523	-0.0656	0.222	-0.0893	0.136	-0.0612	0.118	0.282	0.043	-0.242	-0.317	-0.0548	0.0313	-0.122	-0.359	0.261	0.028	0.0458	0.18	0.0359
B4GN1_HUMAN	B4GALNT1	-0.0837	-0.0454	0.119	0.121	-0.0607	-0.193	-0.0376	-0.000107	0.136	-0.0431	0.159	-0.251	0.0884	-0.136	-0.147	0.192	0.00265	0.0163	0.294	-0.0391	-0.0261	-0.0646	0.099	-0.226	-0.202	0.19	0.168	0.0859	0.145	0.0877
B4GN4_HUMAN	B4GALNT4	-0.0829	0.0738	-0.195	0.261	0.0638	0.0251	-0.172	0.179	-0.0213	0.0142	-0.113	-0.016	-0.0806	0.174	-0.0899	-0.0331	-0.0102	0.0424	0.0999	-0.133	-0.164	-0.0377	0.0079	0.0627	-0.197	0.257	0.109	0.0772	0.135	0.0273
B4GT1_HUMAN	B4GALT1	-0.12	-0.0524	0.111	-0.0825	0.104	-0.159	0.0353	0.138	-0.0195	0.00545	-0.0276	-0.138	-0.181	0.242	-0.0994	-0.106	-0.122	0.115	0.0647	-0.0559	0.219	-0.0595	0.0194	0.0205	0.0537	-0.0608	0.00441	0.0512	0.059	-0.052
B4GT2_HUMAN	B4GALT2	-0.384	0.049	0.0238	-0.00302	-0.0574	-0.207	-0.041	0.279	-0.115	0.267	0.119	0.0308	0.0515	-0.34	0.122	-0.102	-0.0822	-0.093	0.255	-0.27	0.0764	0.0542	-0.211	0.251	-0.128	0.219	0.194	0.0242	-0.239	0.0332
B4GT3_HUMAN	B4GALT3	-0.131	0.0106	0.0446	-0.0857	0.087	0.135	0.0722	-0.0976	-0.0654	-0.224	-0.107	-0.117	-0.132	-0.131	-0.186	0.269	-0.173	-0.158	-0.135	-0.234	0.0036	-0.111	-0.00546	-0.00206	0.0829	-0.151	0.1	-0.108	-0.059	0.0569
BAALC_HUMAN	BAALC	0.0666	0.157	-0.24	-0.136	-0.123	0.192	0.000189	-0.205	-0.161	-0.108	-0.135	-0.313	0.122	-0.329	-0.0821	0.262	-0.245	0.0425	0.141	0.00927	-0.0178	0.301	0.147	-0.00454	-0.296	0.123	0.0696	0.0511	-0.0012	-0.207
BACE1_HUMAN	BACE1	0.0512	0.102	-0.158	-0.0962	-0.193	0.0935	0.0893	-0.149	-0.114	-0.567	-0.0265	0.18	0.162	-0.102	-0.169	0.0749	0.0153	-0.203	-0.328	-0.094	-0.281	0.0398	0.0843	-0.334	-0.401	0.186	0.272	-0.0242	-0.0298	0.00687
BAI1_HUMAN		-0.00757	-0.0754	-0.574	0.529	-0.0508	-0.127	-0.258	0.178	0.0335	0.000285	0.276	-0.507	0.128	-0.016	0.0231	0.0303	-0.0108	0.0258	0.156	-0.167	-0.351	-0.301	0.0407	-0.0684	-0.462	0.502	0.127	-0.00934	0.312	-0.107
BAMBI_HUMAN	BAMBI	-0.206	-0.135	-0.0498	0.315	0.0802	0.165	0.252	-0.157	-0.0198	-0.503	-0.36	0.152	0.339	-0.21	-0.214	0.000451	0.332	-0.027	-0.252	-0.139	0.652	0.145	0.276	0.153	0.282	0.329	0.109	-0.103	-0.21	0.107
BASI_HUMAN	BSG	-0.114	-0.0901	-0.173	0.316	-0.0578	-0.0933	-0.0672	0.0803	-0.00308	-0.0797	0.103	-0.209	0.0111	0.261	-0.0292	-0.0405	-0.018	-0.191	0.179	0.145	-0.268	-0.128	0.0428	-0.0957	-0.164	0.199	-0.011	0.197	0.326	0.133
BASP1_HUMAN	BASP1	0.164	0.0356	-0.443	0.567	0.0176	0.0848	-0.0719	0.141	0.022	-0.103	0.175	-0.122	0.523	0.275	-0.123	0.0523	-0.247	-0.22	0.286	0.285	-0.0717	-0.0684	-0.183	-0.205	-0.46	0.536	0.262	-0.018	0.48	0.0991
BCAM_HUMAN	BCAM	-0.0187	-0.00265	-0.292	-0.0209	0.0868	-0.0321	0.105	0.12	0.0456	0.272	-0.000228	-0.0552	-0.0693	0.117	-0.0433	-0.00337	-0.171	-0.00906	0.209	0.239	0.167	-0.0992	0.177	0.0662	-0.106	-0.0652	0.185	-0.114	-0.0762	0.00235
BDNF_HUMAN	BDNF	-0.0664	-0.235	0.128	0.905	0.256	-0.138	-0.13	0.214	-0.0378	0.126	0.282	-0.289	0.338	0.211	-0.0364	-0.0565	-0.738	0.0621	0.503	0.285	-0.503	-0.452	-0.0491	0.241	-0.228	0.646	0.00565	0.0585	0.566	-0.192
BGAL_HUMAN	GLB1	0.0303	-0.12	0.0604	-0.0794	-0.0785	-0.2	0.117	-0.132	0.0136	-0.194	0.0468	0.0569	-0.18	-0.0757	0.206	0.0353	0.191	0.0863	-0.0271	-0.19	0.0103	0.0615	-0.00903	-0.0348	0.114	0.0341	0.07	-0.208	-0.252	0.0294
BGH3_HUMAN	TGFBI	-0.0805	-0.057	-0.179	0.00499	0.00109	-0.175	0.108	0.101	-0.0257	0.192	0.0266	0.0733	-0.324	0.171	-0.0554	-0.0716	-0.221	0.123	-0.0388	0.149	0.274	0.0591	0.0168	-0.179	0.397	-0.0994	0.00242	0.0543	-0.0215	0.176
BID_HUMAN	BID	0.294	0.305	-0.864	0.329	-0.0563	0.0584	-0.0689	0.189	-0.254	-0.106	0.0287	-0.582	0.199	0.564	-0.183	-0.0345	-0.0186	0.0301	0.125	-0.0241	-0.324	-0.0215	0.179	1.09	-0.145	0.049	0.087	-0.11	-0.0255	-0.0396
BIN1_HUMAN	BIN1	-0.0448	-0.101	-0.0839	0.174	0.0796	0.0869	0.46	-0.236	0.0259	-0.069	0.00437	-0.0857	-0.0847	0.029	0.0194	-0.319	-0.125	-0.65	0.237	-0.0192	0.682	-0.532	-0.0377	0.011	0.114	0.121	0.0218	-0.0578	0.339	-0.0851
BLMH_HUMAN	BLMH	-0.0317	-0.139	-0.0543	0.173	0.0438	-0.0926	-0.239	0.336	-0.117	0.455	0.124	-0.301	0.0894	0.0289	-0.102	0.0181	-0.112	-0.0989	0.0798	0.265	-0.109	0.01	0.00642	-0.143	-0.0556	0.0978	0.199	0.256	0.369	0.0753
BLVRB_HUMAN	BLVRB	0.295	0.302	0.518	0.729	1.02	0.344	0.275	1.78	0.131	3.07	0.375	1.56	-0.371	-0.546	-0.0879	2.75	-0.46	0.0805	-0.254	-0.424	0.174	0.26	-0.254	3.32	-0.155	-0.436	0.903	-0.271	-0.22	-0.17
BMP6_HUMAN	BMP6	-0.11	-0.163	0.202	-0.0663	0.024	-0.131	0.0466	0.222	-0.0421	0.537	0.0268	-0.0917	0.117	-0.034	-0.124	-0.249	0.0728	-0.0536	0.146	0.542	0.415	-0.0635	0.264	0.419	0.00868	-0.0886	-0.00385	-0.0777	-0.00248	0.6
BMP7_HUMAN	BMP7	0.0944	-0.16	-0.15	0.0339	0.0181	-0.129	-0.0727	-0.0397	0.0762	0.306	0.0722	0.115	-0.0659	-0.0537	-0.116	0.126	-0.124	-0.388	-0.163	-0.08	0.162	0.0416	-0.0441	0.0416	0.152	0.0725	0.114	-0.268	-0.112	0.0743
BOC_HUMAN	BOC	-0.0291	0.0877	0.158	-0.261	-0.108	0.00653	0.0887	-0.161	-0.0113	-0.0967	-0.0131	0.108	0.067	-0.0853	-0.0524	-0.0759	0.179	0.23	-0.0395	-0.0591	0.126	0.0604	0.00733	-0.111	0.0514	-0.191	-0.075	-0.0595	-0.204	0.12
BORG4_HUMAN	CDC42EP4	0.291	0.0209	-0.0292	0.0383	-0.19	0.0776	0.0175	0.167	-0.175	-0.0688	-0.0321	-0.278	0.188	0.268	0.000352	-0.141	-0.0388	0.131	0.522	-0.165	-0.3	0.0144	-0.219	0.165	-0.0263	0.188	-0.0176	0.0137	0.0855	0.0946
BPNT1_HUMAN	BPNT1	-0.084	-0.0449	0.058	-0.028	0.298	-0.0591	-0.078	0.168	0.0177	0.432	-0.16	-0.0894	-0.0481	0.17	0.0923	-0.22	0.224	0.234	-0.0303	0.0962	0.228	-0.0643	-0.0583	0.158	0.104	-0.203	-0.0643	-0.137	-0.285	-0.021
BRNP1_HUMAN	BRINP1	-0.0922	-0.109	0.0306	0.0838	-0.171	0.0206	-0.0054	-0.191	0.0155	-0.264	0.0813	0.0916	-0.0275	0.0147	-0.0467	-0.0314	0.0852	0.138	0.11	-0.0403	-0.331	-0.237	0.0364	0.0395	-0.0777	0.0626	-0.00666	-0.00572	0.255	0.00651
BST1_HUMAN	BST1	-0.0736	-0.0222	0.333	-0.252	0.0403	0.216	0.108	-0.00236	-0.476	0.0751	-0.168	0.209	-0.391	-0.021	0.0959	-0.081	0.146	-0.356	-0.23	0.243	0.181	-0.016	-0.165	-0.374	0.259	-0.011	-0.158	0.00121	0.078	-0.039
BST2_HUMAN	BST2	0.085	0.0482	-0.17	0.136	-0.0469	0.0353	0.496	-0.0518	-0.0675	-0.0611	0.0452	0.185	0.0372	0.154	-0.163	-0.298	-0.245	-0.0528	-0.326	0.226	-0.314	0.11	-0.0518	0.0883	-0.206	0.102	0.0335	-0.0359	0.00956	0.275
BT2A1_HUMAN	BTN2A1	0.0652	0.157	0.557	-0.903	-0.0303	0.183	0.0522	-0.194	0.0499	-0.273	-0.0419	-0.0638	0.0144	-0.539	0.0212	-0.08	0.152	0.546	-0.116	-0.114	-0.38	0.164	0.172	-0.155	-0.221	-0.329	-0.229	0.0882	-0.358	0.0449
BT3A2_HUMAN	BTN3A2	-0.229	-0.143	-0.629	0.299	-0.0161	-0.0304	0.374	0.303	-0.196	-0.162	-0.236	-0.131	-0.221	0.092	0.0187	-0.101	0.116	0.631	0.143	-0.0664	0.103	0.18	0.214	-0.667	0.267	0.0219	-0.0112	-0.132	0.0651	-0.0681
BTD_HUMAN	BTD	-0.25	-0.0925	0.0494	-0.0252	0.32	-0.25	-0.124	0.0204	0.0234	0.217	-0.12	0.387	-0.181	-0.182	0.0748	0.215	0.121	-0.159	-0.492	-0.216	0.154	0.148	0.137	0.0771	0.176	-0.0275	0.094	-0.05	-1.03	-0.077
C163A_HUMAN	CD163	-0.0805	0.49	0.214	0.0517	-0.251	0.0233	0.122	-0.104	0.0165	-0.395	0.0806	-0.287	-0.172	-0.0992	-0.0822	-0.0931	0.307	0.208	-0.176	0.132	0.0191	0.109	-0.0203	-0.283	0.285	-0.349	-0.0479	0.0868	-0.0185	0.177
C1GLC_HUMAN	C1GALT1C1	-0.0529	0.117	-0.332	0.0059	-0.0369	-0.153	0.0896	0.119	-0.158	0.399	0.195	0.0265	-0.0742	-0.188	0.0495	-0.023	-0.228	-0.225	-0.0759	0.399	-0.365	0.069	0.00357	-0.518	-0.159	0.407	0.151	0.142	0.201	0.1
C1GLT_HUMAN	C1GALT1	-0.0754	-0.00435	-0.154	0.258	0.033	-0.191	-0.0391	0.0384	0.0239	-0.177	0.0821	-0.415	0.0595	0.124	-0.113	-0.159	-0.0789	-0.0768	0.235	0.139	-0.346	0.168	0.0231	0.0374	-0.287	0.197	0.164	0.0857	-0.0121	-0.00544
C1QA_HUMAN	C1QA	0.0374	-0.163	-0.0665	0.234	-0.113	-0.179	0.299	0.11	0.0311	-0.0799	0.373	-0.358	-0.0247	0.0214	-0.083	-0.0543	0.0423	-0.136	0.0173	0.0815	0.328	0.0598	0.0693	0.164	0.0322	-0.135	-0.00376	-0.0391	-0.329	0.174
C1QB_HUMAN	C1QB	-0.0479	0.0378	0.185	0.0171	-0.673	0.191	0.257	-0.195	0.0466	-0.648	0.223	-0.428	0.0361	-0.516	0.095	-0.099	-0.171	0.169	-0.273	0.291	0.11	0.303	0.136	-0.412	-0.104	-0.17	-0.101	-0.0463	-0.497	0.41
C1QC_HUMAN	C1QC	0.0713	0.0129	-0.0211	0.221	-0.575	0.126	0.0448	0.0867	0.108	-0.363	0.342	-0.371	0.028	-0.201	0.0833	-0.0701	-0.0248	0.0599	-0.185	0.125	-0.0275	0.286	0.0442	-0.314	-0.0779	-0.0611	-0.0192	-0.02	-0.415	0.469
C1QL2_HUMAN	C1QL2	-0.305	-0.0146	-0.251	0.0566	0.0681	0.152	-0.422	-0.0698	0.209	0.438	-0.0916	0.205	0.162	0.021	-0.196	0.175	0.0276	-0.443	0.288	-0.0934	0.838	0.302	-0.426	-0.221	0.058	0.119	-0.394	-0.109	-0.0351	-0.186
C1QL3_HUMAN	C1QL3	-0.0271	0.311	0.0292	0.306	0.0517	0.417	-0.379	-0.0797	0.0512	-0.378	0.0557	-0.2	0.224	0.00139	-0.349	0.422	-0.228	0.182	-0.0497	0.0195	-0.377	-0.0492	0.0064	-0.275	-0.189	0.615	0.112	0.076	0.246	-0.0363
C1QL4_HUMAN	C1QL4	0.000417	-0.302	-0.635	0.467	-0.242	0.361	-0.424	-0.772	-0.159	0.585	0.0336	-0.603	0.00949	-0.365	-0.0199	0.545	-0.032	0.432	-0.221	0.102	-0.782	0.176	-0.0656	-0.626	-0.532	0.671	0.0938	-0.233	0.0686	0.112
C1QT3_HUMAN	C1QTNF3	0.563	-0.0274	-0.107	-0.684	0.00721	0.0294	0.0254	-0.351	-0.406	0.514	-0.223	-0.749	0.206	0.0829	-0.157	-0.106	0.195	-0.0978	0.233	-0.086	-0.474	-0.39	-0.446	0.18	0.355	0.0706	-0.245	0.0406	0.0181	0.489
C1QT4_HUMAN	C1QTNF4	-0.0471	-0.0481	0.134	0.0737	-0.0814	0.193	0.0118	-0.108	0.0242	-0.161	-0.418	-0.0475	0.149	-0.0712	-0.0511	0.0597	-0.041	0.0553	0.0943	0.00284	-0.139	0.0476	0.104	-0.0911	0.0315	0.0926	0.0297	-0.0661	-0.104	0.124
C1QT5_HUMAN	C1QTNF5	-0.113	-0.00405	0.0744	-0.259	0.031	-0.0673	0.211	-0.222	0.076	-0.199	-0.17	-0.197	0.00798	0.0815	0.271	0.0189	0.0596	-0.0427	-0.0618	-0.117	0.285	0.0497	-0.0414	-0.314	0.0843	-0.0666	-0.0178	-0.0264	-0.0131	0.012
C1R_HUMAN	C1R	-0.0201	0.33	0.214	-0.0545	-0.0621	0.0813	0.171	-0.0306	0.0618	-0.387	-0.039	0.218	-0.00561	-0.13	0.00628	-0.0659	0.166	0.341	-0.259	0.226	-0.0909	0.337	0.143	-0.215	0.403	-0.0616	-0.0271	0.0626	-0.0732	0.263
C1RL_HUMAN	C1RL	0.0801	-0.262	-0.112	-0.17	0.281	0.0925	0.316	-0.248	0.0973	-0.28	0.245	0.191	-0.22	-0.245	-0.529	-0.173	0.161	-0.184	0.0331	0.143	0.19	0.491	0.0186	-0.0621	0.392	-0.36	-0.0566	-0.041	-0.382	-0.0421
C1S_HUMAN	C1S	-0.0227	0.29	0.224	-0.0991	-0.202	0.113	0.264	-0.0326	0.118	-0.41	-0.0967	0.184	0.0308	-0.164	0.00255	-0.204	0.0265	0.215	-0.23	0.331	-0.0482	0.261	0.192	-0.418	0.281	-0.113	0.107	0.0417	-0.0529	0.174
C4BPA_HUMAN	C4BPA	-0.0944	-0.691	-0.178	0.252	1.01	-0.383	0.297	0.0421	0.0185	0.849	0.628	0.299	-0.755	0.575	-0.374	-0.301	-0.308	-0.645	-0.0203	0.944	0.72	-0.128	0.447	0.319	0.838	-0.382	0.551	-0.249	-0.203	-0.297
C99L2_HUMAN	CD99L2	-0.088	0.0392	-0.184	0.309	0.0117	0.0322	-0.0481	0.2	-0.0241	-0.232	0.044	-0.272	0.181	0.357	-0.00648	-0.126	-0.0452	-0.241	0.19	0.165	-0.0866	-0.178	0.146	-0.135	-0.141	0.264	0.142	0.0609	0.231	0.0901
CA021_HUMAN	C1orf21	0.0448	0.498	0.166	-0.587	0.179	0.638	-0.186	-0.388	0.133	-0.804	-0.962	0.32	0.372	-0.943	0.245	0.077	-0.111	0.758	-0.135	-0.252	-0.841	0.694	-0.337	0.136	-0.573	-0.0638	0.131	-0.0712	-0.566	0.303
CA123_HUMAN		-0.202	-0.232	0.00975	-0.341	-0.00911	-0.00847	0.0199	0.442	-0.0272	0.87	0.00412	0.275	-0.421	0.286	-0.257	0.325	-0.0513	-0.0402	0.0963	0.192	-0.197	0.0169	-0.0526	0.754	-0.0526	-0.326	-0.0397	0.00436	-0.208	-0.0628
CA2D1_HUMAN	CACNA2D1	0.0886	0.337	-0.353	0.114	-0.0734	0.356	-0.187	-0.18	0.107	-0.209	-0.354	-0.0649	0.404	-0.00973	-0.135	0.216	-0.0268	0.0545	-0.042	0.075	-0.439	0.00625	0.0197	-0.161	-0.53	0.362	0.0384	0.0377	0.165	-0.0435
CA2D2_HUMAN	CACNA2D2	0.181	-0.000109	-0.0365	-0.146	-0.0494	0.028	0.0247	-0.0106	-0.104	0.236	-0.101	-0.318	0.14	0.14	0.145	-0.111	0.225	0.0998	0.108	0.115	-0.274	-0.22	0.164	-0.0534	0.00472	0.0428	0.0499	-0.0518	0.284	-0.0441
CA2D3_HUMAN	CACNA2D3	-0.0132	0.195	-0.415	0.238	-0.0726	0.143	-0.00786	0.064	0.0735	-0.304	-0.115	-0.223	0.404	0.192	-0.112	0.00963	0.0883	-0.131	0.0805	-0.048	-0.371	-0.157	0.0681	-0.0876	-0.311	0.169	-0.0491	0.00081	0.226	-0.158
CAB45_HUMAN	SDF4	-0.0395	-0.0754	-0.0926	0.0991	0.0128	-0.146	0.00557	0.027	-0.0901	0.315	0.0157	-0.341	0.0346	0.115	-0.00926	0.013	-0.0258	-0.0833	0.0888	-0.0606	0.057	-0.136	0.102	0.00482	-0.0125	0.0495	0.0211	-0.0448	0.115	-0.0645
CAD10_HUMAN	CDH10	-0.0405	-0.0359	-0.184	0.337	-0.0451	-0.036	-0.0519	0.168	0.125	0.215	0.264	-0.124	0.0293	0.215	-0.217	0.0619	0.02	-0.0645	0.323	-0.000952	-0.0412	-0.215	-0.00374	-0.107	-0.272	0.36	0.16	0.0994	0.478	-0.0165
CAD11_HUMAN	CDH11	0.052	0.000892	-0.0803	0.0299	-0.108	-0.228	0.119	0.0856	-0.039	-0.25	0.0751	-0.176	0.0503	0.0801	-0.212	-0.0626	-0.0192	-0.184	0.0843	0.139	0.171	-0.21	-0.0826	-0.18	0.0462	0.034	0.0139	-0.0222	0.0982	-0.0122
CAD12_HUMAN	CDH12	-0.152	-0.217	-0.315	-0.0804	-0.278	-0.0989	-0.359	-0.0042	0.333	0.114	-0.0564	0.0332	-0.047	0.205	-0.34	0.308	0.0187	-0.0194	0.29	-0.182	0.104	-0.192	0.155	-0.124	0.0658	0.482	0.0918	-0.111	0.244	0.097
CAD13_HUMAN	CDH13	-0.158	0.193	-0.275	0.291	0.0652	0.115	-0.206	-0.00398	0.0666	-0.329	0.031	-0.299	0.468	0.0879	-0.0567	0.119	-0.108	-0.114	-0.12	0.0801	-0.212	-0.128	0.0612	-0.232	-0.498	0.361	0.0612	-0.067	0.14	-0.033
CAD15_HUMAN	CDH15	-0.0738	-0.0829	0.0727	-0.105	0.219	-0.238	-0.114	0.14	-0.314	0.109	0.239	-0.451	-0.188	0.241	-0.246	-0.0843	0.037	0.0129	0.457	0.138	-0.00303	-0.511	-0.081	0.0427	0.188	0.0696	-0.101	0.0105	0.487	-0.129
CAD18_HUMAN	CDH18	0.176	-0.142	-0.285	0.433	0.0067	-0.0341	0.0149	0.179	0.327	-0.0576	-0.0107	-0.309	-0.0997	0.222	-0.286	-0.17	0.028	0.25	0.369	0.213	-0.185	-0.152	0.0611	-0.291	-0.0619	0.559	-0.0248	0.0431	0.279	0.421
CAD19_HUMAN	CDH19	-0.0181	0.0336	0.166	-0.386	0.109	-0.17	0.413	0.066	-0.252	0.213	0.658	0.0165	-0.242	0.628	0.205	-0.145	-0.00234	-0.179	-0.0587	-0.0971	0.412	-0.217	0.115	-0.0115	0.588	-0.11	-0.51	0.145	0.315	-0.149
CAD20_HUMAN	CDH20	-0.0543	-0.153	-0.0675	0.0961	-0.116	-0.24	0.199	0.215	-0.0402	-0.0184	-0.0176	-0.0785	0.0324	0.254	0.0171	-0.192	0.208	-0.177	0.029	-0.109	-0.0983	-0.00481	0.0384	-0.201	-0.129	0.124	0.107	-0.00339	0.149	0.0641
CAD22_HUMAN	CDH22	-0.0236	0.047	0.226	-0.0728	0.0155	0.161	-0.072	-0.0107	-0.065	-0.0132	-0.023	0.115	-0.155	-0.111	0.00916	0.0122	-0.026	0.16	0.196	0.101	-0.00954	-0.0709	-0.0196	0.0596	0.209	-0.138	0.0294	0.0495	-0.079	0.127
CADH1_HUMAN	CDH1	0.322	0.123	0.0867	-0.0815	0.14	0.162	0.645	-0.0949	0.392	-0.401	0.0889	0.0944	-0.534	0.23	-0.112	0.206	-0.00843	-0.132	-0.0523	-0.0162	0.424	0.0701	-0.0678	0.125	0.387	-0.193	-0.154	0.0567	-0.418	0.0253
CADH2_HUMAN	CDH2	-0.116	0.0591	0.119	0.0206	-0.0607	0.0283	-0.272	-0.0674	0.0258	-0.246	-0.0264	-0.254	0.145	0.0804	-0.0346	-0.122	-0.0893	0.00923	0.0781	0.145	-0.29	-0.259	0.0155	-0.173	-0.202	0.175	-0.0917	0.0498	0.103	0.105
CADH3_HUMAN	CDH3	-0.091	-0.113	0.738	-0.21	0.008	-0.0133	0.0265	-0.258	0.101	-0.11	0.128	0.00697	0.393	-0.332	0.421	0.196	0.276	0.5	-0.106	-0.149	0.0257	0.239	-0.0264	-0.228	0.165	0.0741	-0.326	0.0757	-0.278	0.469
CADH4_HUMAN	CDH4	-0.0585	0.0275	-0.0776	0.167	0.0983	-0.0252	-0.104	0.0563	-0.0529	-0.16	0.0892	-0.185	0.148	0.172	-0.0589	0.0614	-0.0389	-0.0771	0.0111	0.185	-0.00848	0.0348	-0.183	-0.124	-0.0771	0.105	0.0394	-0.0173	0.0383	0.224
CADH5_HUMAN	CDH5	0.06	-0.0366	-0.0879	0.0251	0.249	-0.0638	0.422	-0.215	0.11	-0.137	0.233	-0.0586	-0.0144	0.416	-0.141	-0.092	-0.0507	-0.269	0.185	0.299	0.715	0.0207	0.104	-0.152	0.463	-0.238	-0.0157	0.115	-0.0126	-0.0634
CADH6_HUMAN	CDH6	-0.096	-0.0764	0.039	0.0372	-0.121	-0.132	0.022	0.156	-0.114	0.26	0.118	-0.0628	0.0764	0.172	-0.254	-0.114	0.0769	-0.0318	-0.0797	0.0684	-0.102	-0.173	0.0446	-0.164	-0.0713	0.156	0.113	0.027	0.138	-0.0329
CADH7_HUMAN	CDH7	0.0285	-0.0685	0.0144	0.177	-0.0487	-0.119	0.12	0.126	-0.186	0.211	0.172	-0.226	-0.171	0.38	0.0734	-0.127	-0.106	-0.0699	0.324	0.0506	-0.0126	-0.174	-0.0773	0.0587	0.322	0.18	-0.129	-0.0501	0.229	-0.00445
CADH8_HUMAN	CDH8	0.191	0.0185	-0.238	0.0985	0.0579	0.228	-0.328	-0.142	-0.0788	-0.305	-0.0627	-0.246	0.362	0.0944	-0.158	0.121	-0.162	-0.185	0.175	0.0816	-0.383	-0.0328	0.0074	-0.237	-0.466	0.309	0.143	0.0261	0.0979	0.0877
CADH9_HUMAN	CDH9	0.00277	0.0361	-0.386	0.38	0.0809	0.141	-0.269	-0.0196	0.105	-0.2	0.0451	0.00748	0.552	-0.0324	-0.156	0.224	-0.433	0.0553	-0.0541	-0.191	-0.191	0.0466	-0.162	-0.111	-0.58	0.435	-0.0888	0.134	0.236	-0.052
CADM1_HUMAN	CADM1	-0.0324	0.177	0.0776	-0.0784	-0.0562	0.283	-0.0172	-0.107	-0.00276	0.0125	0.118	-0.12	0.22	0.141	-0.0853	0.0185	0.132	0.253	0.188	0.127	0.109	-0.0561	-0.0306	-0.0599	0.0597	-0.0429	-0.154	0.00247	0.127	0.144
CADM2_HUMAN	CADM2	-0.0276	0.143	-0.249	0.209	-0.0844	0.0343	-0.00327	-0.0534	0.00023	-0.297	-0.0453	-0.262	0.292	0.0269	-0.126	-0.049	0.0497	-0.0466	0.111	-0.0018	-0.422	-0.0968	-0.00432	-0.227	-0.423	0.192	0.0945	0.037	0.0685	-0.0155
CADM3_HUMAN	CADM3	-0.096	0.0234	-0.0296	0.0282	0.00704	0.147	0.0115	0.0348	-0.079	0.055	-0.00202	-0.148	-0.0498	0.0374	-0.0819	-0.0466	-0.0759	0.0535	0.192	0.0634	-0.00989	-0.0202	-0.0711	0.0926	0.0329	0.0684	-0.0686	-0.0702	0.174	-0.0471
CADM4_HUMAN	CADM4	0.0999	0.131	0.226	-0.157	0.0619	0.22	0.0588	-0.0319	0.295	-0.346	-0.0792	0.181	-0.0559	-0.201	0.0016	-0.0459	0.189	0.234	-0.026	0.078	-0.0953	0.371	-0.0981	-0.051	-0.0264	-0.116	-0.0868	0.0824	-0.113	0.0774
CAH1_HUMAN	CA1	0.157	-0.507	0.508	0.919	1.15	0.169	0.0447	2.84	-0.0726	3.95	0.541	2.07	-1.05	-0.983	-0.673	2.96	-0.962	0.0531	-0.994	-0.106	0.539	0.0571	-0.594	4.2	-0.201	-0.667	1.01	-0.532	-0.198	-0.594
CAH10_HUMAN	CA10	0.00895	0.121	-0.0589	0.0808	-0.183	0.169	-0.19	-0.0564	-0.173	0.244	-0.111	-0.189	-0.0614	0.0747	-0.0243	-0.023	0.214	0.0979	0.413	-0.292	-0.453	-0.404	0.0812	0.00321	-0.129	0.123	0.0335	-0.00233	0.425	-0.147
CAH11_HUMAN	CA11	0.21	0.00431	-0.014	-0.0142	-0.179	-0.137	-0.0962	-0.0646	0.0248	0.151	0.116	-0.0219	0.0376	-0.0314	0.166	0.0161	0.296	-0.072	0.15	-0.235	-0.162	-0.0424	0.152	0.0769	-0.175	0.229	0.142	-0.0193	0.324	-0.0812
CAH12_HUMAN	CA12	0.113	-0.0976	0.276	-0.336	-0.235	0.0326	-0.0866	-0.193	-0.469	0.109	-0.212	-0.127	0.0934	-0.00291	0.223	0.0924	0.345	0.339	-0.136	-0.0297	-0.304	0.353	-0.206	0.00595	0.155	-0.107	-0.256	-0.00672	-0.139	0.227
CAH14_HUMAN	CA14	0.396	0.219	0.00206	0.0956	-0.00416	0.0693	-0.00784	0.0211	-0.182	-0.237	-0.108	-0.0369	0.203	-0.0409	0.0657	-0.0802	-0.0764	0.204	-0.138	0.504	-0.186	-0.192	0.0561	-0.0035	0.124	0.129	-0.304	0.216	0.295	-0.0345
CAH2_HUMAN	CA2	0.244	-0.381	0.478	0.673	1.14	-0.27	-0.199	2.77	-0.0852	3.66	0.449	1.79	-0.713	-1.06	-0.795	2.92	-0.672	-0.261	-1.32	-0.815	0.228	0.02	-0.573	3.91	-0.011	-0.534	1.02	-0.409	-0.418	-0.409
CAH3_HUMAN	CA3	-0.295	-0.633	1.22	-0.0665	0.225	-0.399	-0.154	1.19	-0.24	2.19	-0.453	0.677	-0.444	-0.63	0.789	1.36	-1.17	-0.793	-1.36	0.0207	1.6	-0.589	-0.715	0.938	-0.558	-0.882	2.04	-0.555	0.24	0.199
CAH4_HUMAN	CA4	0.0258	0.23	-0.203	0.249	-0.271	-0.019	0.00429	0.0356	0.0287	-0.122	0.031	-0.352	0.255	0.167	0.207	-0.34	0.0932	-0.149	0.387	0.056	-0.32	-0.152	-0.0514	-0.152	0.112	0.245	-0.0487	0.0779	0.255	-0.142
CAHD1_HUMAN	CACHD1	0.24	0.00746	-0.0135	-0.127	-0.0446	-0.121	-0.0629	-0.106	0.0284	0.147	0.0816	-0.0388	0.000706	0.0536	-0.0163	-0.0494	0.416	0.158	0.0676	-0.19	-0.0318	-0.0195	0.0639	0.0483	-0.167	0.118	0.197	0.0385	-0.19	-0.0653
CALB1_HUMAN	CALB1	0.0261	-0.107	-0.224	-0.0108	0.0104	-0.337	0.0887	0.236	-0.338	0.506	0.342	-0.448	-0.297	0.31	-0.0643	-0.035	0.0837	-0.236	0.39	0.137	-0.523	-0.403	-0.0588	0.373	-0.0314	-0.101	0.0694	0.0731	0.0702	0.0254
CALCA_HUMAN	CALCA	-0.176	-0.181	-0.129	-0.239	0.236	-0.353	0.0245	0.0621	0.0797	0.0176	0.222	-0.0288	0.232	0.0456	-0.124	-0.0881	-0.475	0.185	-0.615	0.0894	0.423	0.367	-0.162	0.0906	0.0197	0.043	-0.0221	-0.0269	-0.0493	0.169
CALCB_HUMAN	CALCB	-0.0264	-0.115	-0.181	-0.076	0.00669	0.0618	0.276	0.089	-0.198	0.0426	0.0777	0.00874	0.295	-0.00714	-0.122	-0.113	-0.261	0.353	-0.0941	0.149	0.301	0.155	-0.0333	0.133	0.377	0.0163	0.161	-0.11	-0.212	-0.0344
CALM_HUMAN		-0.0169	0.0898	-0.246	0.2	0.106	-0.0854	-0.0514	0.395	-0.142	0.264	0.0383	-0.145	0.207	0.146	-0.286	0.139	-0.141	0.148	0.0701	0.143	0.437	-0.169	-0.12	0.0395	-0.128	0.00766	-0.0523	-0.0835	0.222	-0.236
CALR_HUMAN	CALR	-0.0579	0.168	-0.0792	0.085	-0.103	-0.0989	-0.0517	-0.00395	-0.111	-0.223	-0.158	-0.0183	0.0941	0.0305	-0.022	-0.21	0.0907	0.14	0.0368	0.0215	-0.351	-0.0183	0.0704	-0.0285	-0.107	0.0519	-0.115	0.0623	0.062	0.123
CALU_HUMAN	CALU	-0.333	0.0285	-0.15	0.186	0.175	-0.153	-0.318	0.131	-0.128	-0.0121	-0.316	0.141	0.0513	-0.155	-0.0242	0.141	-0.188	0.0144	-0.0714	0.1	-0.0907	0.262	0.017	0.01	0.158	-0.171	-0.0131	0.104	-0.332	0.114
CALX_HUMAN	CANX	0.00609	0.31	0.0166	-0.00781	0.00698	0.0695	0.0171	-0.0528	0.0884	-0.248	-0.0526	0.0605	0.169	-0.0698	-0.0101	-0.154	0.205	0.182	-0.1	0.0767	-0.169	-0.0157	0.189	-0.00282	-0.00859	-0.0262	-0.0781	0.145	-0.0196	0.101
CALY_HUMAN	CALY	0.625	0.085	0.159	0.314	-0.0579	0.149	-0.274	-0.16	-0.0419	-0.164	0.105	-0.142	0.122	0.145	-0.0923	-0.142	-0.228	0.275	-0.179	0.2	0.102	0.0427	-0.0819	0.138	-0.34	0.0377	-0.239	-0.00148	-0.133	0.422
CAND1_HUMAN	CAND1	0.0311	-0.231	-0.0952	0.272	0.643	-0.141	-0.062	0.846	0.025	1.85	0.244	0.838	-0.0167	0.129	0.646	0.953	-0.144	-0.0947	-0.146	0.0645	0.0353	0.0454	0.0589	1.86	-0.0791	-0.0678	0.0106	0.00537	0.0508	-0.0852
CANT1_HUMAN	CANT1	-0.043	0.0472	-0.3	0.0495	-0.0102	-0.151	-0.103	0.0272	-0.063	0.0429	0.0888	-0.207	0.157	0.136	-0.0648	0.0192	0.0888	-0.0659	0.055	-0.0552	-0.315	-0.0415	-0.19	-0.161	-0.0968	0.159	-0.0181	0.0596	0.118	-0.0223
CAP2_HUMAN	CAP2	0.225	0.077	-0.225	0.23	0.263	0.0506	-0.33	-0.0224	0.14	-0.0181	0.23	-0.282	0.359	0.113	-0.13	-0.117	-0.186	-0.0634	0.37	0.000482	-0.217	-0.187	-0.0745	-0.228	-0.0642	0.265	0.0546	-0.000939	0.446	-0.189
CAPG_HUMAN	CAPG	0.135	-0.225	-0.217	-0.0272	0.0552	-0.297	0.048	-0.127	0.265	0.0739	-0.076	0.174	0.182	-0.233	0.336	-0.438	-0.0128	-0.171	-0.198	-0.0807	0.243	0.283	0.302	0.322	-0.046	-0.246	0.0371	-0.0827	-0.139	0.125
CAPZB_HUMAN	CAPZB	0.0459	0.0318	-0.135	0.0179	0.257	-0.0321	-0.262	0.461	-0.256	0.877	0.181	0.231	0.0426	-0.0441	0.0584	0.405	-0.286	0.0384	0.195	-0.226	-0.0526	0.0126	-0.00385	0.724	0.351	-0.143	-0.257	0.0956	-0.0784	-0.0737
CART_HUMAN	CARTPT	-0.642	0.342	0.202	-0.119	0.221	-0.244	0.0333	0.126	-0.0815	-0.107	0.0591	-1.24	-0.0795	0.232	0.204	-1.11	-0.0648	0.216	-0.206	0.179	-0.969	-0.0529	-0.266	0.191	-0.332	0.0342	-0.37	0.176	0.0376	-0.24
CASC4_HUMAN	CASC4	-0.0848	0.0405	0.247	-0.327	-0.0225	0.153	-0.194	-0.204	0.0651	0.0197	-0.213	-0.0642	0.0774	-0.301	-0.0655	0.0966	0.121	0.24	0.0432	-0.0129	-0.363	-0.0231	0.0705	0.113	-0.147	-0.0363	-0.00603	-0.0376	0.0127	0.224
CATA_HUMAN	CAT	0.297	-0.255	1.14	0.594	1.26	0.115	-0.0216	1.97	-0.0895	3.29	0.208	2.18	-0.348	-0.874	-0.334	2.81	-0.323	0.183	-0.586	-0.47	0.0479	0.371	-0.334	3.43	-0.0511	-0.438	0.979	-0.316	-0.37	-0.129
CATB_HUMAN	CTSB	0.0814	-0.0258	0.0185	0.0436	-0.124	-0.179	0.145	-0.0309	-0.232	0.221	-0.00643	-0.0824	0.0135	-0.0813	0.0969	-0.00517	0.201	0.101	0.0551	-0.33	-0.102	0.124	0.148	-0.294	0.203	0.147	-0.0497	-0.0219	-0.0678	-0.00572
CATC_HUMAN	CTSC	0.0601	0.328	0.44	-0.331	-0.0776	-0.0568	0.561	0.0436	0.00976	-0.318	0.262	0.218	-0.311	-0.155	0.375	0.269	0.00633	-0.162	-0.247	-0.0761	0.189	-0.0674	0.0981	-0.137	0.417	-0.0606	-0.0816	-0.0506	-0.0296	0.499
CATD_HUMAN	CTSD	-0.00436	0.232	0.576	-0.586	-0.196	0.0593	0.292	-0.455	0.0695	-0.291	-0.124	0.343	0.397	-0.442	0.298	0.0498	0.258	0.233	-0.493	-0.455	-0.43	0.486	-0.00956	-0.382	-0.0331	0.0917	-0.0721	0.0644	-0.562	0.0757
CATF_HUMAN	CTSF	-0.0566	0.0309	-0.275	-0.183	-0.111	-0.175	0.289	-0.212	0.0843	-0.014	-0.0399	0.116	-0.0898	-0.286	0.187	0.163	-0.0986	0.171	-0.088	0.0866	0.0477	0.228	0.114	-0.159	-0.0379	0.0175	0.0131	0.00914	-0.238	0.0797
CATH_HUMAN	CTSH	-0.431	0.069	0.0301	-0.0435	0.0881	-0.238	-0.25	0.253	0.163	-0.0569	0.198	-0.43	0.18	0.0431	0.343	-0.0964	0.203	-0.479	-0.0448	-0.18	-0.413	-0.0305	0.111	-0.00436	0.0876	0.0762	-0.508	-0.0728	0.264	0.145
CATL1_HUMAN	CTSL	0.156	0.259	0.359	-0.367	0.0816	0.15	0.0595	-0.225	0.141	-0.241	-0.173	0.241	0.175	-0.205	0.133	-0.00219	0.164	0.289	-0.131	-0.4	-0.128	0.344	-0.0342	-0.162	-0.227	0.0473	-0.0202	0.0765	-0.184	-0.0236
CATO_HUMAN	CTSO	-0.00269	0.0748	-0.00586	0.0219	-0.161	-0.264	-0.00903	0.0258	-0.14	0.0681	0.0928	0.0221	-0.168	-0.08	0.0578	0.0266	0.197	-0.0386	-0.0488	-0.00856	-0.258	-0.122	-0.0662	-0.0108	-0.176	0.124	0.0444	0.132	0.00792	-0.0607
CATS_HUMAN	CTSS	-0.0668	-0.0401	0.027	0.092	0.00829	-0.438	0.14	0.14	0.258	-0.342	-0.19	0.277	0.0533	0.0437	0.0458	-0.36	0.0468	-0.0141	-0.229	0.0138	0.181	-0.174	-0.14	-0.131	0.344	0.09	-0.174	-0.0898	0.193	0.0573
CATZ_HUMAN	CTSZ	0.252	0.381	0.603	-0.398	-0.0305	0.246	-0.0271	-0.236	0.172	-0.327	-0.177	0.352	0.203	-0.311	0.267	0.161	0.288	0.399	-0.358	-0.21	-0.356	0.38	0.235	-0.17	-0.234	0.0179	-0.0853	0.0889	-0.326	0.207
CAZA1_HUMAN	CAPZA1	-0.105	0.188	-0.0666	0.0273	0.321	-0.104	-0.0911	0.665	-0.0259	1.06	0.28	0.249	0.0323	0.369	0.133	0.534	-0.315	-0.157	-0.0756	-0.0835	-0.0856	0.0993	-0.000324	1.21	0.372	-0.438	-0.0718	0.0566	-0.207	0.00756
CAZA2_HUMAN	CAPZA2	-0.0387	-0.128	-0.098	0.336	-0.326	-0.112	0.208	0.0558	-0.017	0.307	0.562	-0.0431	-0.644	0.268	0.114	-0.476	0.0782	-0.404	-0.0874	0.228	0.331	0.425	0.103	0.0602	0.232	-0.484	-0.288	-0.366	-0.349	-0.0877
CBG_HUMAN	SERPINA6	0.191	-0.323	0.502	-0.526	0.532	1.31	-0.0199	-0.727	0.0621	-0.0382	0.468	0.102	-1.16	-0.173	0.0957	0.217	0.38	-0.28	-0.156	0.11	0.742	1.19	0.114	-0.0596	0.585	-0.486	0.0581	0.0359	-0.73	-0.3
CBLN1_HUMAN	CBLN1	-0.205	-0.222	-0.204	0.364	-0.164	-0.112	-0.103	0.205	-0.352	0.431	0.0874	-0.341	-0.21	0.311	-0.085	-0.0254	0.192	0.074	0.348	-0.212	-0.0413	-0.346	0.158	0.0636	0.258	0.0216	-0.034	-0.0155	0.464	-0.296
CBLN2_HUMAN	CBLN2	-0.208	-0.043	-0.334	0.68	0.207	0.141	-0.0767	0.305	-0.0113	0.0862	-0.113	-0.0824	0.478	0.413	0.0607	0.242	0.121	-0.232	0.191	-0.139	-0.14	-0.175	-0.0113	-0.135	-0.394	0.582	0.0283	0.0135	0.452	-0.208
CBLN3_HUMAN	CBLN3	-0.161	-0.142	0.253	-0.0692	-0.0112	0.214	-0.0138	-0.0296	-0.204	0.428	0.0448	-0.241	-0.221	0.0746	-0.0372	0.0628	0.178	0.114	0.383	-0.201	0.0508	-0.153	0.0429	0.288	0.358	-0.272	-0.0808	-0.178	0.0545	-0.223
CBLN4_HUMAN	CBLN4	0.0528	0.287	0.226	0.187	-0.124	0.803	-0.375	-0.344	0.112	-0.533	-0.39	0.749	0.419	-0.406	0.0596	0.148	-0.102	0.38	-0.229	-0.457	-0.487	0.475	-0.0684	-0.0432	-1.05	0.385	0.143	-0.0962	-0.144	0.105
CBPA4_HUMAN	CPA4	-0.085	0.531	-0.13	-0.264	-0.136	0.154	0.0577	0.0716	-0.261	-0.36	-0.0166	0.612	-0.255	-0.41	0.0981	0.0106	-0.129	0.16	-0.398	0.404	0.183	0.2	0.0257	-0.279	0.552	-0.352	-0.0349	-0.00541	0.443	-0.319
CBPB1_HUMAN	CPB1	0.0279	-0.118	0.144	-0.203	0.488	0.105	0.409	-0.0495	0.288	-0.709	0.0414	-0.504	-0.0456	0.4	0.688	-0.664	0.432	0.00463	0.19	-0.0582	1.36	0.0928	-0.116	0.151	0.0562	-0.034	-0.45	-0.196	-0.0361	-0.0771
CBPB2_HUMAN	CPB2	0.372	-0.203	0.509	-0.17	0.391	0.164	0.571	-0.339	-0.397	-0.323	0.161	0.785	-0.454	-0.155	0.215	-0.293	0.0877	-0.217	-0.259	0.0984	0.57	0.344	0.305	-0.05	0.808	-0.491	0.12	0.118	-0.462	-0.242
CBPD_HUMAN	CPD	0.0756	0.0384	-0.068	-0.22	-0.0467	0.0991	-0.15	0.0128	0.0389	0.33	-0.24	0.152	0.0603	-0.25	0.0913	0.0843	0.0505	0.0241	-0.0823	-0.268	-0.112	0.0906	-0.0882	-0.0292	-0.387	0.103	0.0753	-0.0027	0.00998	-0.113
CBPE_HUMAN	CPE	0.192	0.0152	0.182	-0.116	0.111	-0.255	-0.19	-0.29	-0.0226	0.0213	-0.0616	-0.0429	0.251	-0.114	-0.00925	-0.284	0.299	0.261	0.06	-0.215	-0.448	0.0487	0.138	-0.187	-0.226	0.0723	0.145	0.15	0.229	-0.0945
CBPM_HUMAN	CPM	0.0188	-0.117	-0.475	0.494	0.0965	-0.354	0.146	0.203	-0.111	-0.0414	0.0248	0.0913	0.0816	0.372	-0.0102	-0.0839	0.105	-0.396	-0.0924	0.178	0.0632	-0.0821	-0.163	-0.277	-0.16	-0.00994	0.152	-0.0367	0.283	-0.247
CBPN_HUMAN	CPN1	0.0523	-0.616	-0.185	-0.285	0.296	0.27	0.0456	-0.489	0.0656	0.426	0.546	0.508	-0.794	0.275	-0.637	-0.209	0.0563	-0.716	-0.231	0.128	0.678	0.209	0.19	0.315	0.605	-0.382	-0.057	-0.166	-0.631	-0.198
CBPQ_HUMAN	CPQ	0.0164	0.00145	0.106	-0.339	-0.083	-0.126	0.08	-0.0122	-0.0351	0.372	-0.0606	0.0487	-0.0845	-0.275	0.167	0.0958	0.136	0.266	-0.197	-0.0442	-0.15	0.183	-0.0279	0.168	-0.237	-0.325	-0.00179	-0.13	-0.269	0.0559
CBR1_HUMAN	CBR1	-0.0707	-0.128	0.0321	-0.266	0.142	-0.0733	-0.024	0.0554	-0.0924	0.406	-0.3	0.0648	-0.0302	-0.0122	0.19	0.127	0.104	0.0261	-0.0081	-0.0549	0.0285	-0.193	-0.0293	0.34	0.0645	-0.279	0.0159	-0.0373	-0.0367	-0.0464
CC126_HUMAN	CCDC126	-0.102	0.0701	-0.318	0.097	0.0647	-0.114	-0.183	0.0414	-0.188	0.0582	0.0179	-0.197	0.00814	0.0815	-0.0767	-0.179	-0.184	-0.0477	0.0914	0.267	-0.134	-0.124	0.0732	-0.261	-0.116	0.168	0.149	-0.035	-0.0126	0.143
CC50A_HUMAN	TMEM30A	0.146	-0.0127	0.0736	-0.00933	0.169	0.435	-0.0332	-0.351	0.0566	-0.443	0.165	-0.188	0.058	0.121	-0.177	0.125	-0.146	-0.127	0.146	0.153	0.00795	0.119	-0.0229	-0.375	-0.118	0.238	-0.0749	0.0653	0.00221	0.0329
CCER2_HUMAN	CCER2	0.141	-0.0552	-0.169	0.0778	0.0269	0.197	0.304	-0.276	-0.0486	0.00339	-0.249	-0.0368	0.154	0.154	0.0943	0.299	-0.233	0.0681	-0.173	0.127	-0.398	0.118	-0.156	-0.0424	-0.056	0.353	-0.05	-0.103	-0.0337	0.27
CCKN_HUMAN	CCK	-0.0491	0.246	0.00593	0.0933	0.209	0.398	-0.189	-0.174	0.268	-0.617	-0.303	0.416	0.339	-0.527	-0.158	0.154	0.0138	0.363	-0.168	-0.115	-0.358	0.168	-0.00619	-0.182	-0.463	0.302	0.17	-0.0287	-0.18	0.233
CCL14_HUMAN	CCL14	0.0569	0.276	-0.14	-0.181	0.000283	0.0879	0.0294	-0.0288	0.0552	-1.65	0.298	0.711	-0.22	0.0488	0.361	-0.724	-0.4	0.418	0.16	0.0187	0.773	0.337	0.031	-0.578	0.823	-0.541	-0.433	0.197	0.0029	-0.06
CCS_HUMAN	CCS	-0.2	-0.0986	-0.0444	0.124	0.234	-0.202	-0.0523	0.871	-0.772	1.87	-0.259	0.673	-0.0798	-1.38	0.492	0.958	-0.2	-0.0549	-0.34	0.0332	0.215	0.257	-0.593	1.74	0.144	-0.216	0.141	-0.294	-0.305	-1.35
CD048_HUMAN	C4orf48	0.0656	0.157	-0.588	0.0476	-0.00911	0.219	-0.269	-0.218	-0.137	-0.234	0.118	-0.305	0.314	-0.0689	-0.226	0.332	0.299	0.0965	-0.0283	-0.359	-0.521	0.0954	-0.123	-0.218	-0.554	0.399	0.117	0.0905	0.357	0.015
CD109_HUMAN	CD109	-0.0175	0.0579	-0.124	-0.0583	-0.00402	-0.164	0.441	-0.0246	-0.0469	-0.0392	0.04	-0.105	0.429	-0.0105	0.341	-0.0369	0.0321	-0.322	-0.0149	0.248	0.385	0.0957	-0.0634	-0.0394	0.172	0.236	0.0706	0.12	-0.0333	-0.0668
CD14_HUMAN	CD14	-0.128	0.293	0.23	0.115	0.0458	-0.095	0.131	0.0823	0.226	-0.3	-0.0397	-0.119	-0.237	-0.25	-0.0486	0.0546	0.16	0.151	-0.248	0.0954	0.172	-0.0861	-0.127	0.0925	0.415	-0.275	-0.0112	-0.0127	-0.025	0.145
CD166_HUMAN	ALCAM	0.134	0.245	-0.0146	-0.0207	-0.131	0.219	-0.0605	-0.12	0.037	-0.245	-0.116	-0.0207	0.191	-0.116	0.0377	0.0379	0.191	0.0958	-0.17	-0.0961	-0.193	0.0339	0.0351	-0.219	-0.314	0.109	-0.0703	0.0862	0.137	0.0161
CD177_HUMAN	CD177	-0.0746	0.884	0.287	0.0119	-0.0423	-0.46	1.33	-0.436	-0.272	-0.919	0.61	0.458	0.785	-0.343	0.532	-1.04	-1.12	0.047	-1.44	-0.489	0.84	0.264	0.481	-0.195	0.0474	-0.373	-0.75	0.0102	-0.668	1.14
CD248_HUMAN	CD248	-0.127	0.141	-0.00965	0.172	-0.077	-0.101	0.0588	0.0581	-0.0201	-0.123	0.0386	-0.0145	0.104	0.213	-0.0742	-0.189	0.057	0.0591	-0.0792	0.0974	0.0658	-0.0573	0.168	-0.219	-0.00133	0.0161	-0.00446	-0.078	0.163	-0.00551
CD33_HUMAN	CD33	-0.16	0.59	-0.165	-0.382	0.352	0.66	-0.0235	-0.584	0.143	-0.31	0.592	-0.0763	0.533	-0.0567	0.162	-0.0634	-0.526	0.281	0.403	-0.492	-0.198	0.583	0.552	-0.0592	-0.507	-0.482	0.214	0.435	-0.127	0.292
CD44_HUMAN	CD44	0.118	0.246	0.667	-0.418	-0.0131	0.171	0.0167	-0.443	0.167	-0.481	-0.0736	-0.0524	-0.0544	-0.336	0.443	-0.161	0.472	0.467	-0.18	-0.0914	0.0328	0.476	-0.253	0.0846	0.051	-0.35	-0.144	0.134	-0.138	0.289
CD59_HUMAN	CD59	0.293	0.39	0.112	0.0606	0.016	-0.0926	0.0113	-0.569	0.0928	-0.89	-0.233	-0.31	0.244	0.337	0.189	-0.588	0.253	0.117	0.448	0.364	-0.495	0.0249	0.0309	-1.11	-0.144	0.276	-0.163	0.0415	0.288	0.427
CD8A_HUMAN	CD8A	-0.247	0.0409	0.301	0.125	0.217	0.419	0.0873	0.312	-0.0178	-0.318	-0.00184	-0.156	0.213	-0.0827	-0.104	-0.0542	-0.0557	0.287	-0.244	0.365	0.0869	0.12	-0.0792	0.0122	-0.211	-0.0208	0.189	-0.131	-0.528	0.279
CD9_HUMAN	CD9	0.269	0.000244	0.33	-0.513	-0.0601	-0.238	-0.183	-0.308	0.583	0.2	-0.234	0.352	0.542	-0.353	0.0638	-0.15	-0.457	0.56	-0.303	-0.0368	-0.161	0.0427	0.194	-0.975	0.0565	0.372	-0.102	0.526	-0.47	0.227
CD99_HUMAN	CD99	-0.0916	-0.356	0.0561	0.00403	-0.0364	-0.114	0.24	0.0834	-0.232	0.0719	0.0863	0.161	-0.132	-0.142	-0.128	-0.135	-0.124	-0.111	0.154	0.172	0.274	-0.0783	0.152	0.0494	0.256	-0.37	0.0413	-0.0683	0.135	-0.037
CECR1_HUMAN		-0.0649	0.0225	-0.0129	0.118	0.0182	-0.33	-0.108	0.44	0.0758	-0.0271	0.0963	0.0426	-0.137	-0.0843	0.0152	-0.0233	0.349	0.156	-0.0844	-0.028	0.0622	0.492	-0.0862	0.074	0.307	-0.132	0.00402	0.0791	-0.0247	0.0234
CEL_HUMAN	CEL	1.34	-0.121	0.0449	-0.678	0.0553	-0.0536	-0.0767	-0.276	0.0397	-0.208	-0.8	0.401	-0.142	-0.897	0.344	-0.196	0.763	0.199	-0.742	-0.237	0.0186	0.132	0.365	-0.714	0.103	-0.667	-0.254	0.106	-0.588	0.501
CELR2_HUMAN	CELSR2	-0.0257	-0.102	-0.206	0.0733	0.042	-0.00801	0.0847	0.00408	-0.0852	0.0338	0.00116	-0.0865	0.007	0.0869	0.176	-0.0256	-0.0894	-0.193	-0.00853	0.0747	0.0427	-0.0178	-0.0259	0.0233	-0.0351	0.121	0.0633	0.0366	-0.0559	-0.09
CEMIP_HUMAN	CEMIP	-0.162	-0.00379	-0.0725	-0.0536	-0.217	-0.101	0.103	-0.0842	0.0929	-0.0986	-0.0187	-0.162	-0.21	0.0469	-0.126	0.173	0.0208	0.0367	0.0112	0.0177	0.141	0.0808	-0.0343	-0.0513	0.0799	-0.207	0.0754	-0.0674	0.0203	0.00476
CEND_HUMAN	CEND1	0.0591	-0.323	0.073	0.187	-0.263	-0.0251	0.164	0.505	0.0258	-0.0874	0.0673	-0.457	-0.105	0.28	-0.293	-0.00251	0.0295	-0.26	0.357	0.338	-0.369	-0.277	-0.0969	-0.174	-0.402	0.353	0.0409	-0.0103	0.231	-0.159
CERU_HUMAN	CP	0.16	-0.145	0.46	-0.481	0.305	0.758	-0.0422	-0.442	0.191	0.569	0.61	0.477	-0.677	0.0434	0.224	-0.173	0.385	-0.163	-0.331	-0.0483	0.625	0.957	0.183	-0.171	0.791	-0.476	-0.223	-0.00548	-0.42	-0.0373
CETP_HUMAN	CETP	-0.385	0.152	-0.435	0.342	0.0987	-0.212	0.422	0.231	0.0245	-0.462	0.203	0.275	-0.379	0.3	-0.243	-0.317	-0.404	-0.608	0.937	0.274	0.801	-0.0248	0.161	-0.168	0.222	-0.38	-0.126	-0.381	1.26	0.0521
CFAB_HUMAN	CFB	0.24	-0.0119	0.645	-0.377	0.643	0.436	0.256	-0.794	0.399	-0.197	0.647	0.939	-0.624	-0.0699	0.0341	-0.0201	-0.277	-0.405	0.0353	0.102	0.643	0.658	0.535	-0.0249	1.01	-0.624	-0.172	-0.23	-0.537	0.133
CFAD_HUMAN	CFD	0.244	-0.14	-0.12	-0.308	-0.187	0.0669	0.4	0.00128	0.374	-0.461	0.317	-0.0603	-0.1	-0.0152	-0.0456	-0.139	0.128	-0.131	-0.308	0.633	0.32	-0.0303	-0.0889	0.0532	0.666	0.0287	-0.0936	0.108	-0.115	0.345
CFAH_HUMAN	CFH	0.0242	0.0501	0.139	-0.156	0.256	0.0232	0.434	-0.288	0.282	-0.417	0.213	0.478	-0.435	0.211	-0.108	-0.0936	-0.0293	-0.109	-0.0616	0.403	0.619	0.33	0.161	-0.0682	0.602	-0.221	0.0158	-0.0658	-0.125	0.138
CFAI_HUMAN	CFI	0.157	-0.111	0.426	-0.0057	0.659	-0.0325	0.427	-0.367	0.244	-0.425	0.362	0.92	-0.553	0.00576	0.0326	-0.173	0.166	-0.238	-0.135	0.131	0.928	0.618	0.268	0.176	0.809	-0.536	-0.121	-0.0903	-0.309	0.11
CGRE1_HUMAN	CGREF1	0.022	-0.00411	-0.385	0.544	-0.0813	-0.0815	-0.0789	0.177	0.0215	0.0787	0.0902	-0.646	0.245	0.343	-0.0171	-0.0735	-0.158	-0.153	0.269	0.4	-0.404	-0.243	0.0837	-0.27	-0.226	0.574	0.259	0.0196	0.256	0.221
CH10_HUMAN	HSPE1	-0.0369	-0.0303	-0.161	0.168	-0.0534	-0.193	-0.201	0.336	-0.158	0.298	0.249	-0.249	0.0478	0.162	-0.0466	-0.00206	-0.241	-0.00601	0.0881	0.0432	-0.252	-0.23	-0.19	0.0393	-0.094	0.192	0.0418	0.0328	0.274	-0.0215
CH3L1_HUMAN	CHI3L1	0.363	0.317	0.274	-0.23	-0.00187	-0.118	-0.0535	-0.161	0.198	-0.133	0.0143	0.216	-0.0164	-0.136	0.283	-0.367	0.234	-0.0325	-0.37	0.301	-0.0344	0.0101	0.137	0.152	0.00419	0.138	-0.264	0.155	-0.277	0.127
CH3L2_HUMAN	CHI3L2	-0.0733	0.22	0.24	-0.15	-0.487	-0.372	0.207	0.0917	0.115	0.615	-0.383	0.526	-0.134	0.0837	-0.0842	0.379	0.378	-0.367	-0.205	-0.507	0.473	0.352	-0.335	-0.242	0.568	-0.0809	-0.342	0.512	-0.106	0.412
CH60_HUMAN	HSPD1	0.00231	-0.186	-0.246	-0.248	0.185	0.0904	-0.0213	-0.181	0.43	0.263	-0.106	-0.311	-0.311	0.244	0.124	-0.373	-0.481	0.714	0.144	-0.351	-0.0326	-0.277	-0.065	0.268	-0.217	0.0488	0.328	0.216	0.337	-0.422
CHAD_HUMAN	CHAD	0.0394	-0.157	0.161	-0.0477	-0.102	0.0423	-0.113	0.255	-0.0864	0.0592	0.0892	-0.256	-0.118	0.116	-0.106	0.229	-0.0135	0.0828	0.0765	0.103	-0.308	-0.132	-0.118	-0.143	-0.157	0.174	-0.0146	0.169	0.0927	0.00571
CHADL_HUMAN	CHADL	0.266	0.186	-0.218	-0.191	0.00746	0.0982	0.128	-0.245	-0.317	0.114	-0.00706	0.101	-0.0678	0.103	-0.127	0.554	-0.086	-0.314	-0.117	-0.512	0.197	-0.046	-0.0911	0.79	0.279	-0.0661	0.156	-0.0616	-0.207	-0.25
CHID1_HUMAN	CHID1	0.132	-0.0913	0.235	-0.195	-0.0106	-0.126	0.0492	-0.217	0.171	0.0213	-0.103	0.275	-0.00603	-0.0332	0.139	0.0622	0.25	-0.0799	-0.0659	-0.0709	0.258	-0.00808	0.108	-0.238	-0.0108	0.132	0.173	-0.119	0.088	-0.152
CHIT1_HUMAN	CHIT1	-0.454	0.355	-1.43	0.0901	-0.71	-0.769	1.02	0.794	0.32	0.103	0.622	0.324	-1.53	0.393	-0.146	1.13	1.04	-0.313	-0.3	-0.549	-0.414	0.728	-0.653	-0.595	-0.0146	1.11	-0.337	0.364	-0.0685	0.934
CHLE_HUMAN	BCHE	0.263	-0.0862	0.0583	0.215	0.21	0.149	-0.616	-0.136	-0.0373	-0.0595	-0.0737	0.353	-0.0792	0.0825	0.0375	0.0924	-0.17	0.213	-0.279	0.213	0.377	0.0131	-0.0274	-0.0925	0.0734	0.00316	-0.0781	-0.078	0.294	-0.344
CHRD_HUMAN	CHRD	-0.0884	-0.0979	-0.0939	0.352	-0.0397	-0.218	-0.0113	0.365	-0.0425	0.627	0.206	-0.342	0.173	0.167	0.0668	-0.00652	-0.0421	-0.142	0.167	0.274	-0.00957	-0.225	-0.141	0.389	0.156	0.328	0.135	-0.107	0.178	-0.00183
CHSS2_HUMAN	CHPF	0.0802	-0.0187	-0.181	0.0295	0.178	0.0691	0.0413	0.0213	0.181	-0.375	-0.0348	-0.283	0.287	0.00533	-0.11	-0.167	-0.0632	-0.03	0.362	-0.00177	-0.192	-0.0995	-0.0154	-0.23	-0.272	0.0892	-0.01	-0.0893	0.254	-0.00918
CHST1_HUMAN	CHST1	0.00777	0.088	-0.27	0.179	0.109	-0.0309	-0.0541	0.0318	-0.0356	-0.144	0.064	-0.1	0.234	0.0313	-0.226	0.211	-0.141	-0.122	0.0355	0.0319	-0.195	-0.225	0.0346	-0.0136	-0.0996	0.37	0.0156	0.0682	0.112	-0.0327
CHST3_HUMAN	CHST3	-0.279	-0.281	0.0133	-0.17	0.0319	-0.53	0.246	0.105	-0.0514	0.0833	-0.473	-0.0874	0.225	-0.154	-0.0929	0.0943	-0.0156	0.047	-0.149	0.0907	0.125	-0.181	-0.137	0.146	0.153	0.000923	0.138	-0.0858	-0.0882	0.18
CHST6_HUMAN	CHST6	-0.045	0.181	0.242	-0.154	-0.0302	-0.258	0.376	-0.0519	0.213	-0.3	-0.0804	0.0421	-0.0421	-0.0972	0.326	0.336	0.0149	-0.0147	-0.1	-0.0573	0.269	-0.521	0.105	0.482	0.155	-0.0997	-0.0496	0.035	0.0861	-0.0754
CHST7_HUMAN	CHST7	-0.0246	-0.0519	-0.361	0.00373	0.274	-0.0589	0.0957	-0.0327	0.148	-0.0469	-0.0992	-0.217	0.0565	-0.138	-0.165	-0.346	-0.256	0.12	0.161	0.0978	-0.0921	0.0502	0.0968	-0.0388	0.191	-0.0375	-0.303	-0.0201	-0.205	-0.187
CHST8_HUMAN	CHST8	0.164	-0.12	0.104	-0.0958	-0.0211	0.0308	0.253	0.0279	-0.0975	-0.0307	0.0365	0.0173	-0.0675	-0.0161	-0.0808	-0.0576	-0.021	-0.0129	0.0356	0.293	0.168	0.0783	-0.0971	0.0202	0.123	-0.127	-0.0718	0.067	-0.163	0.0631
CHSTA_HUMAN	CHST10	0.0867	0.0809	-0.0503	0.0318	-0.041	-0.0881	-0.0171	0.256	-0.00264	-0.203	0.0543	-0.294	0.0235	0.0277	-0.0714	0.0456	-0.0591	-0.00631	0.132	-0.00193	-0.0362	-0.198	-0.105	0.0838	0.0178	0.243	-0.0636	0.0569	0.0873	-0.00838
CHSTB_HUMAN	CHST11	-0.0368	-0.0841	-0.0515	-0.0418	0.432	-0.209	0.192	0.433	-0.102	0.794	0.0268	0.153	-0.261	-0.146	0.0313	0.793	-0.029	0.157	-0.448	0.122	0.0683	0.0877	-0.497	0.812	0.305	-0.169	-0.0756	-0.0142	-0.197	-0.0807
CHSTC_HUMAN	CHST12	-0.0531	-0.297	-0.267	0.0526	0.151	-0.465	-0.0582	0.14	-0.176	0.162	0.0805	-0.609	-0.0189	0.181	-0.118	-0.0721	-0.0841	-0.167	0.028	-0.0216	0.165	-0.0771	-0.129	0.196	0.375	-0.0987	-0.0692	0.0391	-0.0897	-0.0809
CHSTE_HUMAN	CHST14	-0.0337	-0.0423	0.0624	-0.00749	-0.0649	-0.552	0.307	0.289	0.0553	0.272	-0.0422	-0.339	-0.0233	-0.00833	0.117	0.0292	-0.247	0.219	0.0934	0.0302	0.238	0.181	0.197	-0.272	-0.0357	0.111	-0.212	0.136	0.0874	0.206
CHSTF_HUMAN	CHST15	-0.113	0.0176	0.0469	-0.09	-0.0774	-0.2	0.121	-0.0232	0.0477	-0.222	0.0847	-0.245	-0.0744	0.0799	-0.22	0.148	-0.102	0.00799	-0.00722	0.00211	-4.79e-05	0.0105	-0.0596	-0.227	-0.244	0.108	-0.0442	0.0292	0.0575	-0.00586
CJ035_HUMAN		-0.0273	-0.188	0.0494	0.32	-0.0965	-0.00216	0.219	0.311	-0.00437	0.0404	0.912	-0.278	0.0653	0.769	-0.183	-0.0405	0.0198	-0.194	0.053	0.393	0.468	-0.328	0.0852	0.28	-0.0212	0.357	0.00809	-0.0994	-0.245	0.429
CK054_HUMAN	C11orf54	0.191	0.283	0.0366	-0.313	-0.395	0.478	-0.33	-0.138	0.488	-0.368	0.0297	0.0286	0.283	-0.195	0.212	0.111	0.144	-0.29	-0.234	-0.193	-0.393	0.278	-0.0667	-0.409	-0.0895	-0.176	0.0817	0.0753	0.0148	0.186
CK087_HUMAN	C11orf87	-0.166	-0.364	-0.51	0.937	-0.0916	-0.392	-0.173	0.51	-0.0527	-0.000642	0.352	-0.459	0.311	0.435	-0.28	0.523	-0.0366	-0.317	0.27	0.0862	-0.287	-0.91	0.0766	-0.455	-0.593	0.744	0.137	0.226	0.658	0.0876
CL049_HUMAN	C12orf49	0.114	-0.0106	-0.069	0.0366	-0.00392	0.25	-0.161	-0.068	0.184	-0.317	0.104	-0.288	-0.00506	0.393	0.031	-0.235	-0.127	-0.181	-0.0872	0.11	-0.0975	0.0253	-0.124	0.113	-0.0231	0.2	0.33	-0.0354	0.111	0.0413
CLC11_HUMAN	CLEC11A	-0.0976	0.0249	0.393	-0.143	-0.00699	-0.358	0.107	-0.0897	-0.2	0.1	0.0838	0.367	-0.313	0.0596	-0.123	-0.134	-0.553	0.0445	-0.0487	-0.0513	0.12	0.0371	-0.0533	-0.137	0.229	0.0596	0.15	-0.0496	-0.251	-0.0745
CLIC1_HUMAN	CLIC1	0.0362	0.0147	0.0296	-0.0449	0.136	-0.21	-0.181	0.261	-0.0919	0.492	-0.0583	0.266	0.268	0.0163	0.115	0.276	-0.0296	-0.00361	-0.216	-0.137	0.148	0.316	0.0637	0.424	0.273	-0.182	0.173	-0.0808	-0.272	0.139
CLIC4_HUMAN	CLIC4	-0.115	0.188	-0.0864	0.0136	0.0132	-0.414	0.0349	0.0688	0.245	-0.35	-0.203	0.187	-0.195	0.0992	0.127	-0.112	-0.165	-0.277	-0.174	0.265	0.272	0.1	0.035	0.154	-0.0322	-0.356	-0.133	-0.0558	-0.238	0.0956
CLM1_HUMAN	CD300LF	-0.516	0.058	0.405	0.0591	-0.0218	0.0733	0.183	-0.579	-0.279	-0.637	0.343	0.392	-0.428	0.0875	0.273	-0.0248	0.212	-0.428	-0.154	0.154	0.173	0.4	-0.445	-0.315	-0.00568	-0.381	-0.631	0.218	-0.0437	-0.102
CLMP_HUMAN	CLMP	-0.0825	0.0682	0.0749	-0.0588	-0.0885	-0.284	0.157	0.0591	-0.141	0.0377	-0.0454	-0.278	-0.201	0.13	-0.068	-0.218	0.235	0.0905	0.33	0.239	-0.124	-0.223	-0.0202	0.0334	0.309	-0.145	-0.024	0.16	0.203	0.116
CLN5_HUMAN	CLN5	0.194	-0.0922	0.354	-0.344	-0.107	0.0317	0.399	-0.303	0.18	-0.497	0.133	0.373	-0.152	-0.1	-0.0147	-0.00385	0.295	0.114	-0.042	-0.459	-0.0904	0.37	0.314	-0.327	-0.205	0.0201	-0.0835	0.0866	0.0585	0.27
CLUL1_HUMAN	CLUL1	0.073	-0.15	0.0172	0.262	0.00972	-0.153	-0.0825	0.581	-0.194	-0.755	0.466	-0.259	0.537	-0.0307	0.478	0.171	0.801	-0.337	0.293	0.317	-0.159	-0.849	0.596	0.134	-0.0765	0.367	-0.094	-0.279	0.167	-0.0249
CLUS_HUMAN	CLU	-0.0126	0.0404	-0.025	-0.0801	-0.158	-0.452	0.151	-0.0844	0.0588	-0.285	0.129	-0.344	-0.0475	0.222	-0.0371	-0.143	-0.0471	-0.131	0.157	0.178	0.221	-0.0253	-0.018	-0.33	-0.159	0.00931	-0.0401	0.0189	-0.0196	0.136
CMGA_HUMAN	CHGA	-0.133	0.0979	-0.366	0.446	0.0207	0.187	-0.327	0.0548	0.0323	-0.686	-0.22	-0.136	0.477	0.15	-0.0443	-0.196	-0.237	-0.229	0.337	-0.113	-0.529	-0.0903	0.0649	-0.201	-0.65	0.426	0.0468	0.0512	0.0764	-0.13
CN037_HUMAN		-0.00837	0.169	0.0801	0.253	-0.157	0.249	-0.00929	0.155	-0.143	-0.211	0.158	-0.371	0.183	0.233	-0.222	-0.166	-0.0835	-0.127	0.398	0.214	-0.378	-0.166	0.0913	-0.00338	-0.12	0.215	-0.0339	0.0149	0.3	0.182
CNDP1_HUMAN	CNDP1	0.179	0.276	-0.402	0.408	0.142	-0.228	0.262	-0.539	-0.111	-0.266	-0.0844	0.0302	-0.028	0.635	0.489	-0.243	0.497	-0.359	-0.325	0.0228	-0.369	-0.139	-0.0284	0.108	-0.181	-0.481	-0.124	0.473	0.227	0.0429
CNDP2_HUMAN	CNDP2	-0.0633	-0.0679	-0.341	0.0707	0.0638	-0.128	0.0426	0.358	-0.277	0.529	0.175	-0.000834	-0.328	0.553	0.289	-0.0426	0.107	-0.3	-0.302	-0.283	0.106	0.0644	0.0102	0.592	0.181	-0.394	-0.103	0.0618	-0.106	-0.151
CNPY2_HUMAN	CNPY2	-0.539	-0.2	-0.365	-0.418	-0.115	-0.376	-0.506	-0.541	-0.202	-0.436	0.177	-0.0811	0.184	-0.179	-0.0914	-0.116	-0.179	-0.0314	-0.0792	-0.398	-0.0695	-0.0688	-0.218	-0.198	-0.0387	-0.0449	-0.138	-0.112	-0.265	-0.0762
CNPY3_HUMAN	CNPY3	-0.0586	-0.0357	-0.113	0.227	0.0125	-0.481	0.0161	0.209	-0.128	0.179	-0.0383	-0.393	0.0483	0.133	-0.279	-0.139	-0.137	-0.254	0.211	0.179	-0.024	-0.288	-0.125	-0.00986	-0.0951	0.215	-0.027	0.116	0.366	0.0265
CNPY4_HUMAN	CNPY4	-0.268	0.401	-0.19	0.0114	0.332	-0.0535	0.0347	0.727	-0.0697	0.398	0.0255	0.167	0.0474	-0.0905	-0.0821	1.86	0.17	-0.0374	0.0177	0.239	-0.111	0.522	0.088	0.0787	-0.00207	0.139	0.061	-0.31	0.152	-0.155
CNR1_HUMAN	CNR1	-0.114	0.241	0.398	-0.137	-0.0788	0.224	-0.272	0.0224	-0.0837	0.143	-0.109	0.276	0.103	-0.171	-0.303	0.328	-0.0705	0.213	-0.126	0.0359	-0.351	0.125	-0.0841	-0.216	-0.193	0.185	-0.0419	0.183	0.0827	0.149
CNRP1_HUMAN	CNRIP1	0.147	-0.0355	-0.0547	0.0284	0.172	-0.0537	-0.176	0.512	-0.164	1.17	0.0161	-0.506	0.0257	-0.00804	-0.00556	0.562	0.00884	0.144	0.356	0.0931	-0.25	-0.205	-0.101	0.882	0.11	-0.124	-0.17	0.167	0.0612	0.114
CNTFR_HUMAN	CNTFR	0.0108	0.000522	0.129	-0.232	-0.02	0.0551	0.00488	-0.263	0.149	-0.25	-0.231	-0.00227	-0.0139	-0.0155	0.0163	-0.114	0.241	0.0882	-0.0186	-0.0643	-0.275	-0.0593	-0.104	-0.136	-0.209	-0.132	-0.157	0.00655	0.241	-0.124
CNTN1_HUMAN	CNTN1	0.0352	0.0455	0.0263	0.101	-0.195	-0.0581	-0.0177	-0.0191	-0.16	-0.218	-0.0296	-0.198	0.0727	-0.00768	0.0612	-0.116	0.204	0.009	0.0641	-0.023	-0.161	-0.0378	0.0605	-0.0801	-0.04	-0.0183	-0.136	0.0803	0.106	0.00186
CNTN2_HUMAN	CNTN2	0.163	-0.0191	-0.189	-0.233	-0.106	0.136	0.0482	0.0358	-0.111	0.0571	0.0768	0.154	-0.254	-0.108	0.0351	-0.306	0.384	0.186	-0.0521	0.0161	-0.119	-0.000593	-0.0268	-0.12	0.0376	-0.0922	0.144	0.295	-0.215	0.116
CNTN3_HUMAN	CNTN3	0.028	0.0795	-0.0504	-0.0144	0.0376	0.254	-0.296	-0.0524	0.0133	-0.133	-0.0132	0.078	0.17	-0.146	-0.186	0.12	0.187	0.103	-0.00963	-0.149	-0.211	-0.0575	-0.0121	-0.12	-0.345	0.212	-0.0518	0.0242	0.131	0.0372
CNTN4_HUMAN	CNTN4	0.109	0.0481	-0.0542	0.124	-0.0483	0.177	-0.113	-0.0553	0.039	-0.086	-0.0436	-0.18	-0.0122	0.235	-0.0264	0.11	0.0258	0.0634	0.0317	-0.0346	-0.236	-0.0857	-0.0135	-0.0761	-0.115	0.182	0.0176	0.00489	0.193	0.11
CNTN5_HUMAN	CNTN5	0.00743	-0.00621	-0.395	0.148	0.0339	0.0274	-0.296	0.452	-0.0896	0.774	-0.0784	-0.092	0.144	-0.0594	-0.0515	0.9	-0.241	0.0182	-0.0747	-0.0226	-0.456	-0.0243	-0.00781	0.837	-0.44	0.255	0.157	0.0593	0.158	0.0743
CNTN6_HUMAN	CNTN6	-0.0458	-0.0099	0.0837	-0.111	-0.27	0.198	-0.0733	-0.145	0.013	-0.0378	-0.0936	-0.297	-0.0119	0.00253	-0.018	-0.119	0.0933	0.114	0.0293	-0.0115	-0.283	-0.107	-0.101	-0.17	0.0399	0.0227	-0.174	0.0256	0.113	0.0694
CNTP2_HUMAN	CNTNAP2	0.152	0.0254	-0.388	0.354	-0.0621	0.233	-0.251	-0.173	-0.019	-0.114	0.122	-0.136	0.255	0.0384	0.145	0.28	0.0292	-0.00665	-0.188	-0.367	-0.328	-0.219	-0.0276	0.289	-0.55	0.39	0.144	0.017	0.337	-0.188
CNTP3_HUMAN	CNTNAP3	0.411	0.324	0.162	-0.104	0.205	-0.0605	-0.0839	-0.158	0.189	0.197	0.0631	0.171	0.0507	-0.0367	-0.252	0.0384	0.209	-0.157	0.333	-0.241	0.169	-0.0656	-0.108	0.683	0.146	0.0116	0.148	-0.205	0.0267	-0.0192
CNTP4_HUMAN	CNTNAP4	0.00842	-0.203	-0.207	0.304	0.0379	-0.155	0.245	0.0161	-0.0518	0.162	0.263	-0.234	0.0305	0.251	0.22	-0.106	0.281	-0.137	0.245	-0.119	0.15	-0.409	-0.111	-0.0555	0.0601	0.177	0.215	0.0218	0.336	-0.14
CNTP5_HUMAN	CNTNAP5	0.00759	0.0538	-0.125	0.203	-0.0347	0.209	0.00488	-0.0159	0.0379	0.0873	-0.00278	0.0352	0.127	0.0284	-0.161	0.193	0.0314	-0.103	0.0328	-0.0258	-0.0497	-0.126	0.0676	0.0979	-0.0501	0.258	0.133	-0.0292	0.188	0.084
CO1A1_HUMAN	COL1A1	0.00928	0.0366	0.329	-0.307	-0.504	0.0784	0.0495	-0.238	0.149	-0.541	0.0981	-0.0395	0.267	-0.333	0.0937	-0.0137	-0.373	0.306	-0.489	0.264	0.0933	0.534	0.0432	-0.512	-0.132	0.0509	-0.0752	0.0173	-0.33	0.355
CO1A2_HUMAN	COL1A2	-0.0907	-0.0456	0.196	-0.412	-0.563	-0.0432	-0.0579	-0.362	0.38	-0.694	0.111	-0.118	0.234	-0.382	0.0651	-0.0226	-0.207	0.112	-0.504	0.237	0.0952	0.456	0.0638	-0.534	-0.111	-0.0446	-0.0306	0.0494	-0.404	0.299
CO2_HUMAN	C2	0.0583	0.162	-0.0343	-0.0484	0.095	0.00392	0.553	-0.312	0.0602	-0.128	0.465	0.441	-0.436	0.0617	-0.149	-0.0299	-0.042	-0.235	-0.121	0.183	0.438	0.483	0.231	0.00826	0.74	-0.294	-0.0753	0.029	-0.36	0.0929
CO3_HUMAN	C3	0.0821	-0.394	-0.222	0.0522	0.433	0.082	0.282	-0.298	0.185	-0.305	0.496	0.391	-0.674	0.25	-0.0695	-0.176	-0.0151	-0.518	-0.0874	0.42	0.714	0.307	0.185	0.114	0.635	-0.419	-0.0454	-0.101	-0.326	0.039
CO3A1_HUMAN	COL3A1	-0.014	0.128	0.317	-0.289	-0.206	0.0354	-0.0351	-0.247	0.124	-0.423	-0.144	0.00487	0.285	-0.107	0.102	0.0981	-0.0714	0.16	-0.409	0.147	-0.0135	0.501	-0.101	-0.344	0.0403	-0.0192	-0.0978	0.0501	-0.183	0.278
CO4A_HUMAN	C4A	0.0422	-0.378	0.574	0.0877	-0.0616	-0.308	0.647	-0.512	0.348	-1.03	-0.932	-0.22	-0.133	-0.189	0.522	-0.234	0.154	0.23	0.484	0.503	0.292	0.967	-0.219	0.122	-0.0254	-0.509	-0.0508	-0.78	0.0363	0.473
CO4A2_HUMAN	COL4A2	0.0954	0.152	0.175	-0.171	-0.0731	-0.105	-0.015	0.129	-0.0462	0.218	0.0694	0.00545	-0.0385	-0.141	0.0254	0.0389	-0.265	0.255	-0.0225	0.000178	-0.111	-0.0824	0.136	0.0221	0.102	0.00722	-0.0588	0.0606	0.000333	0.173
CO4B_HUMAN	C4B	0.0776	-0.213	0.412	-0.0825	-0.273	-0.194	0.391	-0.275	0.208	-0.651	-0.175	0.141	-0.333	-0.241	0.245	-0.29	0.555	-0.0736	0.0742	0.427	0.457	0.279	0.163	0.078	0.331	-0.744	-0.0871	-0.288	-0.106	0.235
CO5_HUMAN	C5	0.104	-0.534	0.158	-0.197	0.704	0.195	0.42	-0.715	0.0462	-0.344	0.426	0.712	-0.955	0.0431	-0.298	-0.226	-0.0816	-0.567	-0.293	0.335	0.745	0.28	0.187	0.0771	0.845	-0.658	0.0121	-0.409	-0.586	-0.11
CO5A1_HUMAN	COL5A1	-0.0761	0.245	-0.129	-0.283	-0.103	-0.0822	0.232	0.16	0.0184	-0.297	0.0725	0.227	-0.21	0.142	-0.134	0.0475	-0.183	0.172	-0.176	0.23	0.293	0.0882	0.0499	-0.347	0.017	0.0357	0.21	-0.0753	-0.15	-0.124
CO5A2_HUMAN	COL5A2	0.0502	0.00468	-0.143	0.149	-0.0532	-0.0355	-0.072	0.271	0.119	0.0924	0.151	0.0935	-0.0181	0.181	-0.234	0.224	-0.233	-0.0861	0.0142	-0.00595	0.187	0.0426	0.072	-0.198	-0.0593	0.314	-0.0523	-0.0372	0.24	-0.103
CO6_HUMAN	C6	0.239	-0.264	0.236	-0.0137	0.716	-0.0861	0.35	-0.531	0.151	-0.257	0.536	0.439	-0.553	0.184	-0.0521	-0.0976	0.0945	-0.971	-0.0492	0.0702	0.536	0.115	0.436	0.163	0.737	-0.282	-0.37	-0.138	-0.54	-0.121
CO6A1_HUMAN	COL6A1	0.0022	0.135	0.205	0.163	-0.0217	0.0241	-0.151	-0.133	-0.000415	0.0209	-0.0354	-0.039	0.206	-0.0146	0.205	0.0697	0.305	-0.0324	-0.0759	-0.133	-0.197	0.00867	0.0263	-0.0186	-0.111	0.285	0.0452	0.117	0.184	-0.0198
CO6A2_HUMAN	COL6A2	0.00425	-0.000417	0.0947	-0.257	-0.206	0.0726	0.38	-0.0271	0.0909	-0.231	0.057	0.0198	0.077	-0.17	0.0983	0.0797	-0.0512	-0.416	-0.0939	0.323	-0.0161	0.173	-0.0627	-0.45	0.271	-0.0649	0.134	-0.0308	-0.195	0.109
CO6A3_HUMAN	COL6A3	-0.105	0.0964	-0.0768	-0.0533	-0.118	-0.177	0.225	0.129	0.0652	-0.0822	0.0374	-0.131	-0.00258	0.00947	0.0646	0.0265	-0.104	-0.127	0.0155	0.271	0.198	0.125	0.0882	-0.141	0.297	0.00221	0.033	0.0809	-0.157	0.126
CO7_HUMAN	C7	-0.00448	0.121	-0.188	0.103	0.0513	-0.00349	0.32	0.27	-0.0181	-0.384	-0.112	-0.0247	-0.0276	0.493	0.0519	-0.369	0.289	0.312	-0.0954	0.346	0.388	0.0619	0.392	-0.105	0.654	-0.132	-0.08	0.231	-0.251	0.228
CO8A_HUMAN	C8A	0.0559	-0.261	0.264	-0.242	0.379	0.359	0.299	-0.767	0.0892	-0.514	0.328	0.795	-1.11	-0.158	-0.0585	-0.417	-0.0832	-0.263	0.149	-0.218	0.828	0.467	0.299	-0.0956	0.961	-0.75	-0.594	-0.00829	-0.792	0.0761
CO8B_HUMAN	C8B	0.00629	-0.511	-0.0812	0.0993	0.613	-0.181	0.281	-0.297	-0.112	0.0559	0.447	0.267	-1.11	0.223	-0.172	-0.318	-0.344	-0.372	0.18	-0.0214	0.681	0.121	0.152	0.0641	1	-0.552	-0.523	-0.0833	-0.555	-0.0368
CO8G_HUMAN	C8G	-0.208	-0.675	0.198	-0.12	0.439	-0.00612	0.132	-0.184	0.0933	0.392	0.289	0.538	-0.936	0.06	-0.0996	-0.19	-0.188	-0.293	0.142	0.187	0.819	0.234	0.144	0.152	0.913	-0.612	-0.378	-0.178	-0.495	0.064
CO9_HUMAN	C9	0.256	0.189	0.503	-0.238	0.465	0.188	0.167	-0.823	0.262	-0.03	0.594	0.299	-0.645	-0.21	-0.0951	0.0195	0.126	-0.32	0.148	-0.128	0.583	0.551	0.288	-0.127	1.02	-0.399	-0.266	-0.0484	-0.547	0.0892
COBA1_HUMAN	COL11A1	0.151	0.0921	0.143	-0.223	-0.196	0.116	-0.061	-0.286	0.0583	-0.519	-0.0941	0.202	0.154	-0.196	0.00927	0.14	-0.137	0.166	-0.266	-0.23	0.0649	0.219	0.0966	-0.186	-0.213	-0.177	-0.0752	0.137	0.0576	-0.0653
COCA1_HUMAN	COL12A1	0.0826	-0.031	0.0865	-0.0468	-0.257	-0.109	0.0493	0.193	0.0615	0.0198	-0.0708	-0.0917	0.0396	-0.261	0.0464	0.277	-0.0131	-0.108	-0.137	0.0639	0.0365	0.365	0.0439	-0.228	-0.0682	0.0996	0.193	0.0154	-0.0922	0.0329
COCH_HUMAN	COCH	0.319	0.278	0.0865	-0.1	-0.272	0.248	-0.0334	-0.257	-0.226	-0.567	-0.29	-0.0847	0.309	-0.0327	-0.384	-0.283	0.0442	0.221	0.0966	0.256	-0.0865	0.155	0.212	-0.23	-0.0626	0.0335	-0.815	0.0973	0.0506	-0.0106
COEA1_HUMAN	COL14A1	0.147	-0.0313	-0.128	-0.152	-0.149	-0.291	-0.0789	-0.153	-0.0969	0.0747	0.0121	-0.172	0.172	-0.0319	-0.216	0.0924	-0.255	0.117	0.0973	-0.146	0.254	0.0592	-0.124	-0.27	-0.0266	0.061	0.0716	-0.0368	-0.0367	-0.0362
COF1_HUMAN	CFL1	-0.176	-0.111	0.0883	-0.139	0.298	-0.0198	-0.167	0.347	-0.113	0.687	-0.131	0.272	-0.038	-0.149	0.388	0.263	-0.166	0.268	-0.166	-0.0506	0.135	0.0183	0.0702	0.653	0.298	-0.265	-0.128	0.0286	-0.129	0.0781
COF2_HUMAN	CFL2	-0.0461	-0.187	0.221	-0.0657	0.142	-0.241	0.253	0.0213	-0.00308	0.61	-0.0355	-0.318	0.224	0.232	0.0933	-0.0649	0.111	-0.0222	-0.0457	0.286	0.121	-0.346	0.0393	0.378	-0.266	-0.248	0.468	-0.00129	0.006	0.0283
COFA1_HUMAN	COL15A1	-0.247	0.133	-0.092	-0.136	-0.153	0.124	0.0411	0.27	-0.178	0.395	-0.119	0.0902	-0.572	0.0979	-0.0786	0.369	-0.121	-0.158	0.045	0.0754	0.116	-0.21	-0.104	0.497	-0.0188	-0.151	0.1	0.0638	-0.223	0.00845
COIA1_HUMAN	COL18A1	-0.112	-0.013	-0.0813	0.147	0.0245	-0.809	0.0094	0.294	0.0495	0.00757	0.0423	-0.0795	-0.19	0.388	-0.218	-0.119	-0.153	-0.254	0.0512	0.285	0.304	0.0863	0.00972	-0.0462	0.249	-0.417	0.134	0.13	0.0473	-0.179
COL11_HUMAN	COLEC11	0.715	-0.35	-0.0689	-0.792	0.21	0.211	0.127	-0.179	-0.183	-0.00846	0.0644	-0.348	-0.0473	0.793	0.323	0.109	0.0508	-0.649	0.808	0.317	0.214	-0.131	0.0296	-0.0742	1.19	-0.525	-0.484	-0.195	-0.125	0.521
COL12_HUMAN	COLEC12	-0.0376	0.0848	-0.148	-0.147	-0.237	-0.302	0.131	0.0794	0.0355	0.137	0.145	-0.308	0.0573	0.382	0.023	-0.314	0.0881	-0.0874	0.105	0.0663	0.00676	-0.25	0.102	-0.588	-0.0772	0.0131	0.0295	0.0157	0.197	0.0996
COLA1_HUMAN	COL21A1	-0.0609	0.0832	-0.212	-0.089	0.136	-0.177	0.365	0.0145	0.0759	-0.0379	0.00773	-0.247	-0.00947	-0.12	0.205	0.148	0.401	-0.268	-0.0266	0.0201	0.453	0.0556	-0.0902	0.0669	0.0588	0.241	-0.104	0.136	-0.392	0.0507
COLI_HUMAN	POMC	0.119	-0.0196	0.47	-0.128	0.0812	0.0207	-0.0455	-0.292	0.24	-0.322	0.0468	0.18	0.0906	-0.0107	-0.0862	0.299	-0.364	-0.0951	-0.152	0.107	-0.0252	0.0157	-0.188	-0.0976	-0.341	0.145	0.369	0.078	-0.0828	0.307
COMP_HUMAN	COMP	-0.396	-0.295	-0.269	-0.233	0.148	0.107	0.302	0.495	0.265	-0.663	-0.228	0.2	-0.782	0.833	0.121	-0.275	-0.0788	-0.0824	-0.552	0.421	0.636	-0.243	0.416	-0.0688	0.526	-0.323	-0.022	-0.108	-0.296	-0.0779
CONA1_HUMAN	COL23A1	-0.75	-1	-0.52	0.873	-0.758	0.523	0.642	-0.847	-0.734	0.574	-0.211	-0.73	-0.465	0.307	-0.584	0.37	0.23	0.401	-0.198	-0.53	0.309	-0.303	0.26	-0.327	-0.0792	-0.486	0.341	-0.188	0.0102	-0.0517
Contaminant_ALBU_BOVIN		0.185	0.31	0.215	-0.261	0.01	0.391	-0.116	-0.387	0.0374	-0.169	-0.242	0.137	0.437	-0.446	0.389	0.125	0.0108	-0.0918	-0.0338	0.186	0.837	0.329	-0.307	0.529	0.107	-0.367	-0.123	-0.0461	-0.268	-0.00687
Contaminant_TRYP_BOVIN		-0.0497	1.51	0.383	-0.711	0.237	-0.0448	-0.504	0.119	0.258	0.312	-0.811	0.0576	0.024	-1.49	-0.101	1.23	-0.337	0.781	1.39	-0.0494	-0.057	0.0839	-0.116	0.827	-0.0852	-0.786	-0.568	2.22	0.431	0.251
Contaminant_TRYP_PIG		0.136	0.0386	0.142	-0.226	0.00545	0.0251	-0.0052	-0.209	0.103	0.0115	-0.124	0.114	0.0136	-0.156	0.0244	-0.0108	0.000379	-0.0177	-0.237	0.166	0.0816	0.238	0.125	-0.14	0.00101	-0.207	-0.0624	-0.123	-0.0341	0.0279
Contaminant_Trypa5		-0.0718	-0.0347	0.0927	-0.289	0.00675	0.128	0.0183	-0.0912	-0.15	0.179	0.0816	0.0799	0.0204	-0.166	0.105	0.107	0.0131	-0.173	-0.328	0.00532	0.234	0.057	0.095	-0.0612	-0.0354	0.0129	-0.0573	-0.0309	-0.198	0.0358
COR1A_HUMAN	CORO1A	-0.0302	-0.0163	-0.307	0.0442	0.373	-0.00765	-0.065	0.31	-0.225	0.293	0.312	0.291	-0.0524	-0.263	0.163	0.121	-0.206	-0.0734	-0.0469	-0.123	-0.0305	0.222	0.156	0.363	0.276	-0.109	-0.322	0.265	-0.0439	-0.0369
CORT_HUMAN	CORT	0.256	-0.342	-0.175	0.273	-0.161	0.108	0.324	0.111	-0.0285	-0.0108	0.443	0.0295	0.00185	0.281	-0.037	-0.233	-0.0267	-0.0116	-0.0625	0.131	-0.106	0.298	-0.092	0.164	-0.142	0.271	0.338	-0.12	-0.0345	0.306
COTL1_HUMAN	COTL1	0.288	0.22	-0.233	0.393	-0.0112	0.0265	-0.315	-0.0943	-0.0593	-0.0563	0.233	-0.00812	-0.0287	0.204	0.134	-0.0456	-0.178	-0.503	0.0634	0.181	-0.0885	0.222	0.484	-0.0515	0.0193	-0.0629	-0.255	0.171	0.0762	0.0975
CP089_HUMAN	C16orf89	0.11	-0.0404	-0.0134	0.172	-0.148	-0.289	0.198	0.0877	-0.0604	0.125	0.157	-0.244	0.146	0.197	-0.144	-0.0359	-0.0341	0.14	0.226	-0.0172	0.337	-0.059	-0.0242	-0.0548	0.124	0.153	-0.0943	0.0534	-0.058	-0.0811
CPLX1_HUMAN	CPLX1	-0.0967	0.439	-0.343	0.17	-0.313	0.00731	-0.163	0.087	-0.073	-0.292	0.138	-0.147	-0.08	-0.0608	0.0182	-0.12	0.161	0.139	0.449	-0.156	-0.497	-0.099	-0.26	-0.344	-0.295	0.086	0.0489	0.00141	0.177	0.0693
CPLX2_HUMAN	CPLX2	0.223	0.523	0.281	-0.476	0.0976	0.563	-0.082	-0.48	0.0658	-0.855	-0.598	-0.0711	0.367	-0.911	-0.033	0.0396	-0.0259	0.798	-0.0339	0.0549	-0.482	0.342	-0.143	-0.0378	-0.466	-0.169	0.363	-0.419	-0.672	0.665
CPMD8_HUMAN	CPAMD8	-0.0135	0.107	0.107	0.0622	-0.203	-0.186	0.221	-0.0104	0.2	-0.166	-0.278	0.0198	0.0323	-0.0362	-0.115	0.202	-0.101	0.247	-0.155	0.0113	0.361	0.199	-0.0819	-0.00162	0.048	0.00139	0.00458	-0.0117	-0.0293	-0.162
CPN2_HUMAN	CPN2	-0.0894	-0.512	-0.196	-0.0226	0.578	-0.0272	0.126	0.0559	-0.0165	0.892	0.639	0.591	-0.691	0.256	-0.522	-0.0758	0.0533	-0.74	-0.245	0.245	0.751	0.226	0.283	0.291	0.776	-0.396	0.000856	-0.127	-0.397	-0.19
CPPED_HUMAN	CPPED1	0.462	-0.128	-0.53	0.365	-0.109	-0.18	-0.254	0.37	0.426	0.421	-0.0225	-0.113	0.335	0.175	0.0344	-0.109	0.0869	0.397	-0.407	0.216	0.247	-0.168	-0.201	0.513	0.165	-0.0994	0.0353	0.0262	-0.016	-0.151
CPVL_HUMAN	CPVL	0.0412	-0.045	0.515	-0.376	-0.0566	0.00369	-0.144	-0.217	0.147	0.0277	-0.25	0.339	0.251	-0.205	-0.363	0.0638	0.214	0.301	0.0748	-0.195	-0.0187	0.18	0.163	-0.171	0.0783	0.0155	0.00635	-0.0676	-0.556	0.43
CPXM1_HUMAN	CPXM1	0.113	0.189	0.0704	-0.356	0.0247	0.0309	-0.135	-0.383	0.158	-0.189	0.0914	0.283	0.182	-0.35	-0.127	0.0801	-0.65	0.351	-0.0964	-0.315	0.0686	0.413	-0.311	-0.00745	0.0437	-0.381	0.233	0.0949	-0.547	-0.241
CPXM2_HUMAN	CPXM2	0.0384	0.00661	0.324	-0.329	0.0978	-0.0327	0.0941	-0.285	0.173	-0.182	-0.461	0.282	0.0151	-0.389	0.0205	0.0421	0.0272	0.168	-0.189	0.00959	0.0389	0.203	-0.0964	-0.441	0.185	-0.0951	0.129	-0.0274	-0.265	0.128
CPZIP_HUMAN	RCSD1	0.412	0.154	0.034	-0.085	-0.0563	0.275	0.0997	-0.0458	0.0559	-0.783	-0.112	-0.061	0.266	0.097	-0.453	0.0751	0.342	0.0437	-0.135	-0.0434	-0.15	0.269	0.216	-0.0079	-0.164	-0.238	-0.487	-0.125	0.0879	-0.00223
CRAC1_HUMAN	CRTAC1	-0.00746	0.217	0.0432	-0.0348	-0.158	0.305	-0.221	-0.236	0.0893	-0.474	-0.195	0.122	0.256	-0.246	-0.0292	-0.0521	0.151	0.0359	-0.0938	-0.237	-0.686	0.0271	-0.127	-0.285	-0.33	0.203	-0.11	0.0692	-0.163	0.0665
CRDL1_HUMAN	CHRDL1	-0.255	-0.174	0.278	-0.164	-0.165	-0.106	0.173	0.0262	0.108	0.12	0.0121	-0.181	-0.355	0.196	-0.0801	-0.00274	-0.117	-0.109	0.136	0.108	0.335	0.259	-0.161	0.0608	0.00988	-0.0707	0.16	0.0178	-0.279	0.159
CREG1_HUMAN	CREG1	-0.0131	0.0154	0.24	-0.196	-0.0529	-0.195	0.24	-0.529	-0.0522	0.0754	-0.143	-0.179	-0.0115	-0.0971	0.0509	0.158	0.205	0.0179	-0.227	0.0764	-0.0916	0.0638	0.359	-0.0791	-0.0932	0.0825	0.0867	0.154	-0.0543	0.0274
CREL1_HUMAN	CRELD1	-0.134	0.3	0.611	-0.0519	-0.142	0.221	0.0422	-0.165	0.0808	-0.197	0.177	-0.296	0.118	-0.116	0.0887	-0.18	-0.165	0.0675	-0.025	0.576	-0.207	0.0257	0.0885	-0.514	-0.17	0.14	-0.196	0.186	-0.0477	0.13
CREL2_HUMAN	CRELD2	-0.0929	-0.0362	-0.239	0.225	0.0615	-0.0582	0.07	-0.315	-0.251	0.0949	0.345	-0.448	0.124	0.195	0.0393	-0.153	-0.108	0.139	0.307	-0.0197	-0.0112	0.249	0.0592	-0.498	0.109	-0.0733	-0.151	0.091	0.246	0.0123
CRF_HUMAN	CRH	0.1	0.0785	0.327	-0.188	0.156	0.635	-0.0391	-0.423	0.0426	-0.506	-0.115	0.168	0.574	-0.575	-0.285	0.0945	0.0345	0.146	0.0561	-0.317	-0.538	0.12	-0.179	0.115	-0.476	0.0737	0.00466	0.0497	-0.0407	-0.0546
CRHBP_HUMAN	CRHBP	0.372	-0.000573	0.318	-0.123	0.168	-0.0497	-0.22	-0.257	0.0333	-0.0799	-0.3	0.623	-0.03	-0.0869	0.356	0.267	0.153	0.101	-0.0702	0.161	0.151	0.402	0.0154	-0.0418	-0.0142	-0.0898	-0.265	-0.0465	-0.302	0.0951
CRIP2_HUMAN	CRIP2	-0.116	0.16	0.00395	0.433	0.337	-0.117	0.0622	0.464	-0.0758	-0.0519	-0.109	-0.316	0.297	0.0486	0.333	-0.279	-0.196	-0.341	0.127	0.482	0.794	-0.172	0.234	-0.00808	-0.00691	-0.313	0.0719	-0.162	-0.129	-0.0117
CRIS3_HUMAN	CRISP3	0.389	-0.309	0.493	0.04	0.0285	0.31	0.283	-0.679	-0.244	-0.743	0.369	0.653	-0.784	0.00811	-0.326	0.0502	-0.223	-0.597	0.0893	0.463	0.676	0.174	0.0666	0.00593	0.858	-0.309	-0.513	-0.175	-0.334	-0.253
CRK_HUMAN	CRK	-0.236	0.0676	0.184	0.166	-0.0965	-0.107	-0.246	-0.105	-0.0163	0.0262	-0.0572	0.184	-0.0637	0.105	-0.00153	-0.295	-0.0471	0.223	0.164	0.0699	0.127	0.309	-0.124	0.0711	-0.206	-0.0589	0.0481	0.0491	-0.104	-0.0632
CRLD1_HUMAN	CRISPLD1	-0.0865	-0.0981	-0.171	0.101	-0.0066	-0.705	0.102	0.315	-0.116	0.21	-0.179	-0.19	0.262	0.381	0.306	-0.154	-0.038	-0.485	-0.0578	0.147	-0.926	-0.00113	-0.00633	0.015	0.433	-0.0839	-0.327	0.304	0.102	0.18
CRP_HUMAN	CRP	-0.776	1.06	0.835	0.276	-0.467	0.193	-0.787	-0.696	-0.137	2.73	1.29	1.97	-0.474	-0.791	-0.195	-1.24	-0.583	-0.346	-0.821	1.55	0.385	2.66	1.03	0.219	0.954	0.349	-0.384	-1.05	-0.862	0.802
CRUM2_HUMAN	CRB2	-0.0171	-0.0933	-0.122	-0.062	0.0282	0.122	0.0466	-0.0468	-0.135	0.353	0.0722	-0.0337	-0.26	-0.0519	0.0494	0.189	0.192	-0.0704	0.0699	-0.0865	0.0773	-0.0153	-0.203	0.139	-0.0113	-0.288	-0.192	-0.18	-0.327	-0.0416
CRYM_HUMAN	CRYM	-0.139	-0.328	-0.454	0.335	-0.135	-0.165	-0.128	0.26	-0.247	0.226	0.0933	-0.534	0.0502	0.181	-0.152	-0.0881	-0.172	0.336	0.339	0.00106	0.352	-0.239	-0.262	0.347	-0.212	0.254	0.132	0.06	0.0888	-0.288
CSF1_HUMAN	CSF1	-0.1	0.266	0.101	-0.0508	-0.121	0.137	-0.091	-0.0263	0.151	-0.25	0.0191	0.237	-0.0409	-0.167	0.006	0.0865	-0.0311	0.164	-0.154	0.173	-0.0157	0.383	-0.0311	0.258	0.0281	-0.075	-0.125	-0.0511	-0.0907	0.307
CSF1R_HUMAN	CSF1R	0.059	0.0934	0.0998	0.154	0.04	0.173	-0.205	-0.399	-0.177	-0.1	0.161	0.219	-0.259	-0.135	-0.202	0.0994	0.29	-0.104	-0.159	-0.417	-0.412	0.372	-0.0298	-0.0022	-0.295	0.0518	0.0624	0.00658	-0.0115	-0.0985
CSF2R_HUMAN	CSF2RA	0.35	0.512	-0.364	0.182	-0.316	0.043	-0.00927	-0.0163	0.00472	-0.268	-0.167	-0.00575	-0.158	-0.391	0.0762	0.305	0.244	0.111	-0.21	0.23	0.239	0.23	-0.333	0.0552	-0.207	0.0574	-0.157	-0.264	-0.336	-0.232
CSMT1_HUMAN	CCSMST1	0.0269	0.131	0.0122	0.052	0.0157	0.148	-0.269	-0.114	-0.286	-0.324	-0.0151	-0.422	-0.0196	-0.027	-0.262	-0.0886	-0.0612	0.345	0.0229	0.108	-0.617	-0.0854	0.0586	-0.0388	-0.16	0.129	-0.117	-0.0305	0.0421	0.0911
CSPG2_HUMAN	VCAN	-0.136	0.00684	0.189	0.0309	-0.168	-0.0359	0.0297	0.181	-0.0686	-0.24	-0.107	-0.258	-0.0844	0.00101	-0.0694	-0.092	0.237	0.168	0.149	-0.0129	0.0238	-0.00789	0.0325	-0.0223	0.195	-0.205	-0.242	0.000284	0.181	0.172
CSPG4_HUMAN	CSPG4	0.0512	0.0915	-0.0254	-0.00384	0.00341	0.125	-0.053	-0.145	0.123	-0.00548	-0.0523	0.0646	0.00157	-0.0609	0.0456	-0.00766	0.113	0.231	-0.056	-0.156	0.237	0.0714	-0.00811	0.00198	-0.0823	-0.118	0.0161	0.00785	0.0399	-0.145
CSPG5_HUMAN	CSPG5	0.0129	0.351	0.0278	-0.0326	-0.194	0.436	-0.0688	-0.251	0.0466	-0.195	-0.000911	0.0274	0.35	-0.099	-0.0968	0.132	0.175	0.397	-0.126	-0.00214	-0.022	-0.048	-0.16	-0.15	-0.377	0.552	0.0515	-0.108	0.044	-0.0214
CSRP1_HUMAN	CSRP1	0.052	0.0157	0.0353	-0.502	-0.182	0.105	-0.135	0.0497	-0.163	0.299	0.182	0.197	0.421	0.12	0.102	0.11	-0.0791	0.161	-0.0409	-0.15	0.293	0.0413	0.0813	0.337	-0.0999	-0.16	-0.452	-0.247	-0.156	-0.118
CSTN1_HUMAN	CLSTN1	0.0324	0.134	0.1	-0.00825	-0.0595	0.269	-0.281	-0.264	0.0192	-0.215	-0.088	-0.14	0.204	0.104	-0.131	0.115	-0.0125	0.226	0.181	-0.172	-0.291	-0.263	0.131	-0.265	-0.124	0.268	-0.0372	0.00363	0.14	0.0516
CSTN2_HUMAN	CLSTN2	-0.0635	-0.02	0.0636	-0.107	0.0346	0.0369	-0.356	0.0057	-0.0829	0.614	-0.355	0.188	0.199	-0.16	0.0107	0.0274	0.0238	0.142	-0.00907	-0.359	-0.221	-0.17	0.113	-0.135	-0.241	0.183	0.0313	0.0788	0.189	0.0413
CSTN3_HUMAN	CLSTN3	0.0387	-0.0451	0.161	0.0179	0.0555	0.265	0.0335	-0.141	-0.0226	-0.0761	-0.127	-0.0237	-0.0185	-0.031	-0.14	0.144	0.0741	0.171	0.0622	-0.0366	-0.308	0.0422	0.0301	0.0285	-0.157	0.108	-0.0462	-0.0262	0.0467	0.0928
CUTA_HUMAN	CUTA	0.088	0.244	0.11	-0.174	-0.326	-0.056	-0.0285	-0.0373	-0.00197	0.11	0.0145	-0.453	0.0711	-0.0628	0.0462	0.034	0.147	0.0573	0.0954	-0.0878	-0.397	-0.0376	-0.0766	-0.188	0.0149	0.13	-0.0339	0.0609	0.138	-0.0945
CXA1_HUMAN	GJA1	-0.407	-0.19	0.0924	-0.142	0.305	0.0773	0.213	-0.072	0.0405	0.206	0.0306	0.0401	-0.114	0.075	-0.19	0.0855	-0.507	-0.0656	0.275	0.213	1.01	0.131	-0.0244	0.0843	0.493	-0.276	-0.0693	-0.064	-0.134	0.0783
CXAR_HUMAN	CXADR	0.03	-0.0584	0.0718	-0.00152	-0.0502	-0.0134	-0.154	-0.0272	0.251	-0.0965	0.169	-0.115	0.267	0.316	0.0706	0.183	0.0173	-0.061	0.00328	0.12	-0.196	-0.0778	0.0331	-0.0612	-0.134	0.123	-0.1	0.0829	0.271	0.147
CXCL7_HUMAN	PPBP	0.0543	-0.771	0.23	0.124	0.63	-0.245	0.271	0.583	0.000921	2.49	0.503	1.68	-1.14	-0.0218	-0.262	0.467	-0.466	-0.0873	-0.296	0.258	1.01	-0.0382	-0.288	1.37	0.679	-0.16	-0.0706	-0.225	-0.0859	-0.441
CXL16_HUMAN	CXCL16	0.396	-0.164	-0.135	-0.646	0.226	0.105	-0.175	0.188	-0.303	-0.225	-0.0382	-0.348	0.332	0.414	0.024	-0.246	-0.185	0.248	0.271	-0.391	-0.285	0.504	0.233	0.0812	-0.25	-0.0485	-0.17	0.293	-0.209	0.498
CYC_HUMAN	CYCS	-0.128	-0.0984	-0.0259	-0.0747	0.301	-0.000292	0.0912	0.336	-0.023	0.24	-0.228	-0.067	0.203	-0.224	-0.0406	-0.105	0.308	0.237	0.0536	0.223	-0.331	-0.168	-0.115	0.162	-0.0553	0.279	0.0228	-0.0544	0.298	0.0933
CYTB_HUMAN	CSTB	-0.075	0.0378	0.0635	-0.0429	-0.0135	-0.216	-0.267	0.507	0.177	0.752	-0.142	0.305	-0.121	0.451	-0.102	0.286	0.151	-0.0287	-0.0393	0.0296	1	-0.0171	0.141	0.275	0.258	-0.353	0.0806	-0.062	-0.279	-0.16
CYTC_HUMAN	CST3	0.265	0.144	-0.0134	0.0574	-0.119	-0.101	-0.328	-0.00544	0.0957	-0.445	-0.215	-0.371	0.324	-0.0826	-0.27	-0.117	-0.216	0.138	0.0236	0.322	-0.624	0.0611	0.142	0.00919	0.00525	0.223	-0.167	-0.223	0.039	0.132
CYTL1_HUMAN	CYTL1	-0.0714	0.19	-0.272	-0.182	-0.624	-0.088	0.117	-0.191	0.0235	-0.513	-0.314	-0.54	-0.0111	-0.297	0.0435	0.0166	0.0351	0.0372	-0.0707	0.502	-0.0993	0.00794	0.468	-0.536	0.0951	0.185	-0.408	-0.0554	-0.027	0.0202
CYTM_HUMAN	CST6	-0.061	0.0165	-0.264	0.402	0.0336	-0.423	0.267	0.044	0.0719	-0.301	-0.0066	-0.361	-0.22	0.408	-0.204	-0.29	-0.228	-0.0976	0.203	0.389	0.254	-0.106	0.381	-0.175	-0.00147	-0.0346	-0.202	-0.0329	0.345	0.0864
CYTN_HUMAN	CST1	-0.0841	0.0634	-0.884	0.176	-0.566	-0.802	0.577	0.737	0.557	-0.903	-0.889	0.64	-0.354	0.226	-0.796	-0.225	0.587	0.834	-0.246	0.179	0.434	-0.709	0.819	0.124	-0.321	-1.02	0.114	-1.15	-0.764	0.971
DAF_HUMAN	CD55	-0.0984	-0.0155	0.123	0.0108	-0.0376	-0.0357	0.0672	-0.039	0.0588	-0.175	-0.121	-0.146	0.13	0.103	-0.103	-0.128	0.0746	0.00764	0.0255	0.0345	0.19	0.0995	-0.0534	-0.0579	0.0977	-0.000175	0.0694	-0.0287	0.0214	-0.0473
DAG1_HUMAN	DAG1	0.00924	0.0925	0.124	-0.149	-0.0608	-0.0895	0.0841	-0.146	0.222	-0.298	-0.0743	0.0575	0.0265	-0.0007	-0.0279	-0.0621	-0.128	0.117	0.177	0.0254	-0.167	-0.0751	-0.0757	-0.162	0.0042	0.06	-0.0352	0.124	-0.0383	0.161
DBNL_HUMAN	DBNL	0.063	-0.079	-0.255	0.141	0.292	0.16	-0.388	0.332	-0.0785	0.511	-0.0343	0.204	-0.228	-0.118	0.271	-0.622	0.0187	0.376	-0.137	0.462	-0.0242	-0.643	0.333	0.618	0.137	0.0279	-0.359	-0.218	-0.121	0.119
DC1L2_HUMAN	DYNC1LI2	0.265	0.375	0.311	0.116	0.0226	0.368	-0.12	-0.129	-0.0426	-0.636	0.0194	0.247	0.56	-0.283	0.121	-0.184	0.00062	0.202	0.218	0.375	-0.123	-0.06	0.05	-0.235	-0.44	0.134	-0.161	0.0184	0.0776	0.186
DCBD1_HUMAN	DCBLD1	0.216	0.38	-0.0592	-0.0498	-0.0637	0.333	0.419	-0.131	0.128	-0.452	-0.147	0.231	-0.158	-0.0464	0.0648	0.564	0.0806	0.303	0.0548	-0.00845	-0.298	0.0135	-0.0867	0.929	-0.268	-0.0478	-0.0311	0.0583	0.0288	0.0509
DCBD2_HUMAN	DCBLD2	0.13	-0.0192	-0.282	-0.112	0.0295	0.0939	0.0162	0.081	-0.0129	-0.00254	0.0268	0.0964	-0.226	-0.0465	-0.0822	-0.0104	0.154	0.0673	-0.0157	-0.0672	-0.0588	0.0135	0.173	-0.0903	-0.00669	0.124	-0.0494	0.00526	0.149	0.0841
DCC_HUMAN	DCC	0.044	0.126	-0.161	0.117	-0.0315	0.175	-0.135	-0.0786	-0.0388	-0.052	0.0836	0.0666	0.11	-0.00823	-0.12	0.228	0.0278	-0.0668	-0.0168	-0.09	-0.194	-0.035	-0.0841	-0.0914	-0.23	0.237	0.0193	0.0267	0.0777	0.0587
DDAH1_HUMAN	DDAH1	0.157	0.176	-0.117	-0.0815	-0.153	0.0421	-0.182	-0.0501	0.0147	-0.0313	-0.0454	-0.187	0.0837	-0.0269	0.00191	0.00324	-0.202	0.049	0.237	-0.0056	-0.381	-0.0133	-0.222	-0.0926	-0.237	0.16	0.0198	-0.0349	0.06	0.114
DDAH2_HUMAN	DDAH2	0.0922	-0.0229	0.111	-0.129	0.183	0.321	-0.0258	-0.0406	0.0291	0.362	-0.114	0.234	-0.116	0.48	0.334	-0.103	0.0279	-0.0246	-0.0743	-0.0497	0.348	0.136	-0.000473	0.328	-0.125	-0.18	-0.091	-0.0288	0.0676	0.0166
DDB1_HUMAN	DDB1	-0.0232	0.16	-0.0658	0.149	0.181	-0.0234	-0.041	0.0795	-0.019	-0.0366	0.163	-0.0832	0.188	0.00124	-0.111	-0.0914	-0.0482	0.0266	0.239	-0.0197	-0.201	0.0223	-0.0491	0.213	-0.0189	0.195	0.151	-0.000784	0.081	0.226
DDI2_HUMAN	DDI2	-0.101	-0.501	0.137	0.079	0.783	0.339	-0.0956	1.22	-0.143	2.4	0.308	1.08	0.102	-0.17	-0.242	1.76	0.3	-0.0629	-0.98	-0.224	-0.107	0.0218	-0.186	2.33	0.0824	-0.2	0.375	-0.186	-0.244	-0.295
DDR1_HUMAN	DDR1	0.0527	0.182	-0.136	-0.0394	-0.105	0.019	0.0965	-0.22	0.0502	-0.392	0.000117	0.261	-0.0543	-0.137	0.105	-0.0817	0.337	0.0487	-0.273	-0.213	-0.0644	0.0649	0.0703	-0.284	-0.481	0.105	-0.0622	0.0626	0.162	-0.115
DDRGK_HUMAN	DDRGK1	0.242	0.0996	0.156	-0.026	0.0284	0.079	-0.0709	0.0209	0.064	-0.0646	-0.158	-0.17	0.0998	0.0366	0.159	-0.27	-0.059	-0.0377	-0.07	0.0678	-0.0526	0.104	0.0157	-0.413	-0.16	-0.129	-0.131	0.0355	-0.387	0.0732
DEFB1_HUMAN	DEFB1	0.171	-0.166	0.341	-0.0555	0.177	-0.0562	-0.494	-0.208	0.246	0.34	-0.327	-0.554	-0.252	0.34	0.13	-0.295	0.0633	0.293	0.592	-0.00473	0.113	-0.427	-0.0911	-0.506	0.588	-0.316	0.351	0.552	0.0578	0.891
DERM_HUMAN	DPT	-0.143	0.179	0.0909	-0.495	-0.707	-0.448	0.456	0.181	-0.142	-0.584	0.0854	-0.3	0.0918	0.287	-0.728	-0.0442	-0.416	0.0165	-0.187	0.609	0.448	0.0783	-0.457	-0.0516	0.543	-0.583	-0.331	-0.0966	0.23	0.00128
DEST_HUMAN	DSTN	0.106	-0.104	-0.0289	-0.0727	0.447	-0.531	0.0157	0.212	-0.585	0.249	0.268	0.212	-0.0639	-0.158	-0.00465	0.402	-0.0429	-0.432	-0.137	-0.379	0.592	0.113	0.236	0.547	0.0701	-0.391	0.17	0.015	-0.232	0.107
DHH_HUMAN	DHH	-0.0716	0.297	-0.209	-0.381	-0.372	0.0646	0.315	-0.232	0.102	-0.474	0.0573	0.0576	-0.613	-0.162	-0.542	0.167	-0.168	-0.366	0.205	0.0562	0.0479	-0.169	-0.0736	0.0945	-0.0773	0.00644	0.171	-0.0525	-0.577	0.145
DHPR_HUMAN	QDPR	-0.222	0.165	0.032	0.0948	0.0075	-0.00867	-0.105	0.0919	0.0579	-0.268	-0.213	-0.112	0.0259	-0.09	0.048	-0.19	0.269	-0.0304	-0.0179	0.224	-0.317	-0.175	0.0726	-0.0845	-0.019	0.018	-0.141	0.217	0.192	-0.0988
DIA1R_HUMAN		-0.435	-0.143	-0.236	0.123	-0.0159	-0.456	0.0682	0.111	-0.116	0.213	0.0306	0.141	-0.174	0.00148	0.0331	-0.27	0.187	-0.0724	-0.321	-0.215	-0.122	-0.00511	0.0558	-0.285	-0.378	0.0282	-0.0176	-0.00256	0.114	0.082
DIAC_HUMAN	CTBS	-0.0126	0.153	0.496	-0.481	-0.0125	0.252	-0.0754	-0.408	0.217	-0.3	-0.16	0.435	0.0612	-0.389	0.232	0.0067	0.262	0.171	-0.436	-0.178	-0.0643	0.483	0.0656	-0.333	0.036	-0.16	0.212	-0.182	-0.366	0.182
DJB11_HUMAN	DNAJB11	0.384	0.298	0.285	-0.489	-0.06	0.329	0.0676	-0.323	0.379	-0.366	-0.526	1.36	0.041	-0.399	-0.447	-0.302	0.183	0.0495	-0.176	-0.343	0.582	0.222	-0.0734	0.0357	0.155	-0.286	0.0431	0.0844	-0.236	-0.486
DKK3_HUMAN	DKK3	-0.0528	0.223	-0.364	0.458	-0.0386	-0.368	0.0437	0.161	0.0467	0.00101	0.167	-0.535	0.106	0.337	-0.0926	-0.253	-0.164	-0.0514	0.214	0.151	-0.133	-0.339	0.118	-0.156	-0.296	0.298	0.0505	0.0196	0.283	-0.251
DLDH_HUMAN	DLD	-0.0657	0.14	-0.0275	0.209	-0.0871	0.0693	-0.366	0.286	0.0603	-0.0648	-0.211	-0.0537	-0.151	-0.351	-0.191	0.614	-0.274	0.0874	-0.227	-0.0485	-0.445	0.0655	-0.186	0.011	0.0713	0.235	-0.063	0.13	0.0898	0.219
DLK1_HUMAN	DLK1	0.148	0.617	-0.0309	-0.00715	-0.0436	0.0717	-0.399	-0.123	-0.0923	-0.629	-0.323	-0.255	0.19	0.147	-0.267	0.149	0.17	0.135	-0.0858	0.227	0.00299	0.21	-0.158	0.31	-0.14	0.0328	0.031	-0.0948	-0.335	0.216
DMKN_HUMAN	DMKN	0.18	0.235	0.317	-0.321	-0.114	0.252	-0.169	-0.177	0.277	-0.297	-0.155	-0.287	-0.0935	-0.265	0.0132	-0.0377	0.331	0.217	0.289	0.302	0.297	-0.154	0.00827	0.153	0.0155	-0.33	-0.0455	0.16	-0.245	0.329
DNAS1_HUMAN	DNASE1	0.237	0.117	0.568	-0.27	-0.0238	0.149	-0.282	-0.042	0.199	-0.117	-0.0607	0.406	-0.0709	-0.268	-0.0607	-0.195	0.268	0.489	-0.0597	-0.385	-0.0445	0.155	0.222	-0.201	0.477	-0.563	0.162	0.227	-0.0158	0.297
DNER_HUMAN	DNER	-0.00982	0.00942	-0.153	-0.103	-0.128	0.0801	0.0337	0.122	-0.00453	0.153	-0.214	-0.146	-0.0197	-0.105	0.111	0.00512	0.133	0.0463	-0.0441	-0.0514	-0.227	0.0675	0.0327	0.172	-0.0119	-0.183	-0.167	0.0613	-0.0878	0.0447
DNJC3_HUMAN	DNAJC3	-0.0714	-0.027	0.0303	0.0632	-0.00628	-0.201	0.0754	-0.0214	0.0323	0.191	0.00957	-0.0322	-0.0514	0.281	0.0251	-0.0661	-0.128	-0.0848	0.0652	0.151	0.305	-0.038	0.0792	-0.159	0.123	0.118	0.101	0.0036	-0.056	0.0759
DNPH1_HUMAN	DNPH1	-0.186	-0.532	-0.26	0.142	0.148	0.0105	0.183	0.465	-0.0706	1.25	-0.212	0.302	-0.203	-0.397	0.438	0.566	0.0954	-0.188	0.0954	0.0119	-0.0563	-0.094	-0.118	1.02	0.232	0.0104	0.482	0.297	0.509	-0.549
DNS2A_HUMAN	DNASE2	0.105	0.225	0.44	-0.411	-0.0688	-0.0129	-0.0414	-0.406	0.00222	-0.188	-0.0486	0.171	0.256	-0.273	0.386	-0.112	0.488	0.0962	0.00973	-0.332	-0.0735	0.0624	0.0662	-0.226	-0.268	0.124	0.328	-0.0578	0.178	-0.211
DNSL1_HUMAN	DNASE1L1	-0.117	0.0508	-0.106	-0.113	0.015	0.0652	-0.0498	0.304	0.041	0.0848	0.0327	-0.1	-0.102	0.148	0.0779	-0.0676	0.212	0.0958	0.215	0.0355	0.0332	-0.0479	-0.021	0.113	-0.114	0.136	-0.0582	0.0247	-0.0713	-0.187
DOPD_HUMAN	DDT	-0.338	-0.115	0.0743	0.252	0.318	-0.115	-0.301	1.32	-0.321	2.23	0.116	0.199	-0.581	0.321	0.184	1.57	0.258	-0.0674	-0.0322	-0.157	0.212	0.0973	-0.598	1.81	0.0662	-0.351	0.157	0.149	-0.0689	-0.504
DOPO_HUMAN	DBH	0.219	-0.519	-0.00958	0.315	0.0631	0.0604	0.0351	-0.264	-0.231	-0.0349	0.326	0.581	-0.357	-0.027	0.0463	0.226	0.115	-0.622	-0.418	-0.258	0.159	-0.326	0.297	0.309	0.467	0.0736	0.137	-0.32	-0.489	0.0224
DPB1_HUMAN	HLA-DPB1	-0.43	-0.28	0.204	-0.319	-0.0273	0.0454	-0.0141	0.0286	0.184	0.345	0.514	0.586	-0.738	0.184	0.00846	0.493	-0.604	-0.0269	0.0272	NA	0.318	0.152	-0.163	0.295	0.788	-0.186	-0.638	-0.279	-0.647	-0.486
DPEP2_HUMAN	DPEP2	0.0652	-0.114	0.137	0.0147	0.18	0.178	0.283	-0.185	-0.107	-0.152	-0.185	0.269	-0.18	-0.28	-0.0185	-0.188	0.0701	0.336	-0.389	-0.0352	0.234	0.0677	0.222	0.016	0.277	-0.0346	0.259	-0.281	-0.272	-0.197
DPP10_HUMAN	DPP10	0.126	0.0726	-0.335	0.291	-0.0927	0.15	-0.183	0.0338	0.288	-0.0518	0.0425	-0.0191	0.0185	-0.0255	-0.0365	0.508	0.0926	-0.312	-0.0278	-0.131	-0.0832	-0.0151	0.0068	0.122	-0.471	0.31	0.161	-0.0832	0.228	0.00654
DPP2_HUMAN	DPP7	0.316	0.0717	0.229	-0.59	0.102	-0.0204	0.135	-0.00187	-0.0944	0.265	-0.385	-0.241	-0.132	-0.00495	0.367	0.185	0.447	-0.0166	-0.233	-0.226	-0.169	-0.187	0.128	-0.00498	-0.00671	0.18	0.286	0.129	-0.0172	-0.405
DPP3_HUMAN	DPP3	0.0472	-0.085	0.0223	-0.224	-0.0349	-0.00376	0.0541	0.22	-0.038	0.399	-0.0448	0.0297	0.334	-0.201	-0.214	0.0296	0.138	-0.0098	-0.0212	0.118	-0.0278	-0.034	-0.171	0.326	-0.0447	0.0538	0.128	0.00368	0.0332	-0.188
DPP6_HUMAN	DPP6	0.0327	0.034	-0.171	0.176	-0.0272	-0.00369	0.033	0.00833	0.0108	-0.0675	0.163	-0.0661	0.065	0.25	0.00293	0.00304	-0.0236	-0.154	0.0778	0.0269	-0.00582	-0.116	-0.0735	0.0541	-0.184	0.237	0.1	-0.0161	0.254	-0.00764
DPYL2_HUMAN	DPYSL2	0.119	-0.348	-0.118	0.218	-0.0104	-0.434	-0.205	0.448	-0.13	0.561	0.0526	-0.0703	-0.13	0.552	0.468	-0.186	-0.0951	0.266	0.0611	-0.155	0.359	0.106	-0.0532	0.142	0.0926	-0.0508	-0.0248	0.0109	-0.201	-0.0739
DQB1_HUMAN	HLA-DQB1	-0.389	0.579	-0.549	-0.118	-0.255	-0.203	-0.216	1.66	-0.595	0.923	-0.218	0.141	-0.197	0.0279	-0.255	-0.33	0.166	0.00979	-0.202	1.62	-0.0983	0.157	0.31	-0.0285	1.56	-0.139	-0.215	0.257	0.203	0.319
DRA_HUMAN	HLA-DRA	-0.815	-0.727	0.00721	-0.509	0.108	-0.444	-0.347	0.196	0.622	0.103	0.0042	0.146	-0.727	-0.74	0.366	-0.687	0.25	0.887	-0.154	0.0847	0.229	-0.374	0.242	0.299	0.602	0.0686	0.269	-0.565	0.352	-0.899
DSC1_HUMAN	DSC1	-0.22	-0.246	-0.568	0.322	0.108	0.00435	0.107	0.0146	0.0589	0.21	-0.201	-0.493	0.0694	-0.0826	-0.277	-0.0231	-0.271	-0.345	0.356	0.226	0.126	-0.132	0.0812	-0.398	-0.0167	0.246	0.162	-0.205	-0.475	0.196
DSC2_HUMAN	DSC2	0.111	0.013	0.139	-0.209	-0.241	-0.173	0.0519	-0.23	0.0472	-0.376	0.0281	-0.239	0.239	0.000527	-0.0758	-0.24	-0.00439	-0.159	-0.099	0.115	0.171	0.155	0.0104	-0.252	-0.00662	-0.164	0.0643	-0.137	-0.162	0.0161
DSC3_HUMAN	DSC3	-0.0401	-0.101	0.371	-0.17	-0.208	-0.287	0.175	0.0987	0.542	-0.219	0.0769	0.373	-0.288	0.248	-0.308	0.0106	-0.0933	0.234	-0.0265	0.082	0.603	0.451	-0.0592	-0.369	-0.114	0.058	0.16	0.145	-0.194	-0.0245
DSCAM_HUMAN	DSCAM	0.111	0.109	-0.0849	-0.00357	0.0034	0.121	-0.171	-0.0201	-0.0871	0.117	-0.00334	-0.0223	0.0551	-0.18	0.237	0.0941	-0.0409	0.00637	0.075	-0.13	-0.0172	0.0971	-0.0717	-0.198	-0.148	0.259	0.0834	0.0548	-0.0142	-0.07
DSCL1_HUMAN	DSCAML1	0.0287	0.273	-0.0563	-0.212	-0.193	0.0718	-0.0589	-0.106	-0.123	-0.491	0.0914	0.224	-0.0567	0.0279	0.0727	0.0269	0.39	0.107	-0.377	-0.213	-0.0158	0.202	-0.00288	-0.0769	-0.104	0.227	0.119	0.147	-0.236	-0.108
DSG2_HUMAN	DSG2	0.0157	0.129	0.18	-0.295	0.0253	0.175	0.176	-0.211	0.0109	-0.302	-0.283	0.0154	-0.00747	0.0818	0.0047	0.348	0.0173	-0.161	-0.205	0.311	-0.0163	-0.0725	-0.116	0.576	-0.193	-0.166	0.0344	-0.289	-0.379	0.00724
DTD1_HUMAN	DTD1	-0.186	-0.0443	-0.21	0.294	-0.386	-0.191	0.606	0.806	0.456	0.713	-0.408	0.595	-0.127	0.163	-0.381	0.32	0.0276	-0.24	0.442	0.0777	-0.0954	-0.152	-0.0258	0.246	-0.289	0.471	0.369	0.339	0.548	-0.545
DYL2_HUMAN	DYNLL2	-0.0148	-0.215	-0.685	0.69	-0.00727	-0.623	0.177	0.498	-0.277	0.571	0.278	-0.427	-0.031	0.641	-0.094	0.104	-0.408	-0.479	0.479	0.519	-0.00951	-0.629	-0.0115	-0.000565	-0.0864	0.365	0.0221	0.311	0.803	-0.269
DYN1_HUMAN	DNM1	0.169	-0.134	-0.176	0.231	0.0517	0.1	-0.0463	0.25	-0.163	0.129	0.121	-0.42	0.0831	0.235	-0.199	-0.0951	-0.151	-0.0317	0.28	0.193	-0.29	-0.313	-0.0262	-0.0345	0.000864	0.174	-0.053	0.132	0.464	0.0261
E41L2_HUMAN	EPB41L2	0.107	-0.216	-0.23	0.112	-0.0193	0.152	0.0402	0.325	-0.135	0.562	-0.159	0.225	-0.0337	0.22	0.0316	0.501	-0.328	-0.227	-0.23	-0.152	0.277	-0.106	0.0721	0.938	-0.0535	-0.0383	-0.0395	-0.0402	-0.0749	-0.059
ECE1_HUMAN	ECE1	-0.0555	-0.161	0.199	-0.127	0.294	0.136	0.339	0.282	0.172	0.388	-0.115	0.181	0.0148	-0.039	0.0522	-0.0838	0.141	0.233	-0.0878	-0.00232	0.148	0.296	-0.144	-0.00372	0.149	-0.0155	-0.0162	0.0306	0.162	-0.0397
ECM1_HUMAN	ECM1	-0.158	0.247	-0.109	0.0743	0.153	-0.0712	-0.126	0.122	0.077	-0.357	-0.018	-0.217	0.0676	-0.142	0.254	-0.371	0.253	0.0828	-0.117	-0.185	0.264	0.0446	0.202	-0.0741	0.0481	-0.197	-0.234	0.237	-0.14	0.197
ECM2_HUMAN	ECM2	0.0466	-0.297	-0.0765	0.0478	-0.262	-0.584	0.0337	0.248	0.112	0.13	-0.0319	0.0717	0.0784	0.0831	-0.336	-0.0584	-0.34	0.26	-0.0456	0.0966	0.439	0.334	0.093	-0.0989	-0.193	-0.013	-0.079	-0.113	0.0628	-0.1
EDIL3_HUMAN	EDIL3	0.102	0.154	0.326	-0.569	0.174	0.0845	-0.0988	-0.038	-0.0356	0.261	-0.0938	0.124	0.0658	0.0415	0.0332	0.259	-0.417	-0.0925	0.107	-0.1	0.385	0.144	-0.0749	-0.0872	0.0198	-0.144	0.0951	0.233	-0.232	-0.225
EDN3_HUMAN	EDN3	0.0603	-0.0974	-0.295	0.0366	0.112	-0.076	-0.176	0.341	0.1	-0.16	-0.291	-0.743	-0.0312	0.0607	-0.011	0.371	-0.265	0.174	0.182	0.153	-0.436	-0.361	-0.194	0.134	-0.0678	0.0684	-0.0688	-0.213	0.117	0.38
EDNRB_HUMAN	EDNRB	0.227	-0.0157	0.291	-0.355	-0.121	0.181	-0.0803	-0.189	-0.161	-0.0992	0.0384	-0.293	0.15	0.243	0.0437	0.0599	-0.41	0.000994	-0.0234	-0.225	-0.17	0.0117	0.0121	-0.201	-0.379	-0.00796	0.063	0.0121	0.0532	0.415
EF1A1_HUMAN	EEF1A1	-0.0625	-0.528	0.00307	0.00124	0.388	-0.0799	0.154	0.411	-0.0315	0.632	0.00593	-0.0753	-0.64	0.825	0.281	-0.11	0.00379	-0.282	-0.0732	-0.239	0.619	-0.597	-0.0508	0.253	0.753	-0.323	-0.0616	0.0263	0.0784	-0.441
EF2_HUMAN	EEF2	-0.268	0.042	-0.00209	0.0369	0.144	-0.292	-0.234	0.502	-0.0983	0.232	0.0431	0.0612	-0.452	-0.125	0.121	0.496	-0.295	0.0373	-0.236	-0.03	-0.035	-0.0575	-0.0581	0.599	0.254	-0.203	-0.0997	-0.0599	0.134	0.0598
EFC14_HUMAN	EFCAB14	-0.206	-0.129	-0.372	0.286	-0.0509	-0.568	0.0688	0.246	-0.365	0.00422	0.227	-0.64	-0.134	0.37	-0.289	-0.167	-0.221	-0.216	0.0534	0.308	0.362	-0.114	0.201	-0.113	0.188	0.184	0.00455	0.00236	0.0461	-0.278
EFNA1_HUMAN	EFNA1	0.063	0.132	0.187	-0.139	-0.104	-0.121	0.0324	-0.172	-0.098	-0.039	0.0428	0.175	0.261	-0.0774	0.208	-0.0712	0.26	-0.0182	-0.061	-0.175	-0.0849	0.0858	0.0534	-0.273	-0.162	0.194	-0.0388	-0.105	0.167	-0.0926
EFNA3_HUMAN	EFNA3	-0.0669	0.0365	-0.326	0.265	0.0289	-0.0114	0.0597	0.148	-0.00225	-0.171	0.136	-0.193	0.128	0.213	0.0494	-0.156	0.0271	-0.0526	-0.107	-0.129	-0.241	-0.0842	-0.0223	-0.165	-0.443	0.327	0.0351	-0.0223	0.0805	-0.131
EFNA5_HUMAN	EFNA5	-0.135	-0.126	-0.14	0.117	-0.0242	0.11	-0.221	-0.0237	0.113	0.201	0.0206	-0.149	-0.0258	0.149	-0.0684	0.376	0.0427	-0.0142	0.134	0.17	-0.315	-0.156	-0.0168	-0.0491	-0.0646	0.22	-0.0613	-0.0274	0.229	-0.19
EFNB1_HUMAN	EFNB1	0.0135	0.157	0.0236	-0.107	-0.142	0.0335	0.0224	-0.155	0.0183	-0.332	-0.000924	0.0588	-0.0796	-0.104	-0.0493	-0.155	0.0907	0.0947	-0.2	0.0677	0.218	0.0447	0.0238	-0.351	-0.0554	-0.0131	-0.0737	-0.0541	-0.0148	-0.00777
EFNB2_HUMAN	EFNB2	0.0446	0.163	-0.158	0.237	0.034	-0.0292	-0.0154	0.0319	-0.00826	-0.155	-0.00761	-0.371	0.17	0.101	-0.137	-0.0884	0.0942	-0.0471	0.0873	0.179	-0.319	0.0122	-0.00398	-0.392	0.0584	0.166	-0.0519	0.0824	0.303	0.00757
EFNB3_HUMAN	EFNB3	-0.0423	0.0176	-0.0949	0.136	0.0203	0.205	-0.15	-0.0618	0.158	-0.287	-0.0626	-0.0225	0.277	-0.0475	-0.0874	0.199	-0.107	0.0838	-0.0305	0.12	-0.0536	-0.00778	-0.058	-0.193	-0.226	0.253	0.066	0.0511	0.128	-0.0308
EGFLA_HUMAN	EGFLAM	0.338	-0.0201	-0.0649	-0.114	-0.147	-0.28	0.362	-0.129	0.134	0.2	0.385	0.226	-0.0131	0.0908	-0.0106	-0.193	-0.101	0.25	-0.246	-0.141	0.105	0.177	0.298	-0.176	0.125	-0.0745	0.281	0.0145	-0.0152	-0.105
EGFR_HUMAN	EGFR	0.074	0.00464	0.153	-0.133	-0.0212	-0.242	-0.074	0.0158	0.133	0.0903	-0.39	0.0124	-0.0638	0.13	0.0417	-0.0596	0.319	0.0927	0.0828	-0.0626	0.0979	-0.0721	-0.305	0.256	-0.0346	0.0468	-0.0145	-0.0295	0.123	-0.139
EMC10_HUMAN	EMC10	0.0455	0.0264	-0.188	-0.0415	-0.137	0.0282	-0.00433	0.0443	0.147	0.334	-0.212	-0.0749	0.211	-0.228	0.0434	-0.0574	-0.0115	0.292	0.0453	-0.0606	-0.389	0.0863	0.0327	-0.0854	-0.0318	0.0233	0.0216	0.132	-0.0507	0.0434
EMIL1_HUMAN	EMILIN1	-0.142	-0.122	-0.0128	-0.214	-0.108	0.148	0.435	0.0844	0.0373	0.305	-0.0324	-0.0707	-0.0142	0.361	-0.135	-0.119	-0.0605	0.344	-0.0204	0.0518	0.212	0.281	0.0816	-0.196	0.128	-0.16	0.193	-0.124	-0.222	-0.143
EMIL2_HUMAN	EMILIN2	0.226	-0.356	-0.0599	0.15	0.0256	-0.33	0.184	0.0854	0.187	-0.416	0.511	-0.225	-0.0159	-0.0878	-0.291	-0.239	-0.445	0.207	-0.266	0.0348	0.381	0.209	0.0297	-0.523	-0.0232	0.000268	-0.118	0.078	-0.346	0.143
EMIL3_HUMAN	EMILIN3	-0.0684	-0.00694	-0.301	-0.0194	0.137	-0.169	0.0506	0.467	-0.206	0.729	-0.1	0.393	-0.124	-0.135	0.0426	0.498	-0.146	-0.0513	0.0945	-0.0383	0.42	0.00354	-0.253	0.33	0.174	0.107	0.183	-0.0215	-0.401	0.0222
ENDD1_HUMAN	ENDOD1	0.116	0.17	-0.0635	-0.0876	-0.0336	0.109	0.00986	-0.154	0.284	-0.355	0.0681	-0.196	0.0413	-0.221	0.113	-0.0735	0.0752	0.228	-0.104	0.226	-0.28	0.179	0.214	-0.231	-0.117	-0.0464	-0.168	0.117	0.0177	0.059
ENOA_HUMAN	ENO1	0.111	-0.0312	0.176	-0.229	0.084	0.0239	-0.195	0.121	-0.0299	0.293	-0.102	0.0778	0.0188	0.00522	0.431	-0.038	0.0384	0.173	0.0445	-0.14	-0.118	-0.0965	-0.201	0.326	-0.101	-0.0068	0.0293	-0.035	-0.076	-0.0609
ENOB_HUMAN	ENO3	-0.76	-0.241	0.114	0.527	0.11	-0.0488	0.517	0.241	0.272	-0.0207	-0.645	-0.196	-0.455	0.206	0.525	0.228	-0.322	-0.347	0.589	-0.122	0.93	-0.22	-0.208	-0.058	-0.0484	-0.433	1.49	-0.284	-0.0236	0.0577
ENOG_HUMAN	ENO2	0.137	-0.0996	-0.0899	0.0128	-0.15	-0.0595	-0.153	0.0564	-0.0415	0.0601	0.141	-0.073	0.0577	-0.0391	0.00705	-0.159	0.0838	0.167	0.226	-0.0464	-0.196	-0.145	-0.0907	-0.141	-0.109	0.0915	0.0789	0.0257	0.215	-0.0205
ENOPH_HUMAN	ENOPH1	0.221	-0.168	0.0396	0.0665	-0.0213	-0.0156	0.0782	0.102	-0.174	0.357	-0.263	-0.0487	0.0207	-0.103	0.0856	-0.207	0.205	0.0183	-0.0323	0.166	7.2e-05	0.0709	-0.221	0.15	-0.164	-0.368	-0.0757	0.0178	-0.0587	0.112
ENPL_HUMAN	HSP90B1	-0.0979	0.446	-0.13	0.0765	-0.239	-0.361	-0.0961	0.102	0.0444	-0.146	-0.0369	-0.285	-0.0165	0.156	0.212	-0.0159	-0.333	-0.308	0.159	0.364	-0.185	-0.224	-0.0932	0.0699	0.265	0.0806	-0.333	-0.185	0.177	0.263
ENPP2_HUMAN	ENPP2	0.292	0.346	1.05	-0.678	-0.00836	0.414	-0.14	-0.625	0.231	-0.345	-0.271	0.694	0.256	-0.511	0.211	0.182	0.368	0.744	-0.23	-0.416	-0.25	0.868	-0.145	-0.612	-0.0181	-0.0939	0.0908	0.305	-0.27	0.425
ENPP4_HUMAN	ENPP4	0.011	-0.181	-0.56	0.145	0.0127	-0.44	0.0633	0.377	-0.189	0.665	0.407	-0.424	-0.152	0.253	-0.104	0.149	0.264	-0.505	0.163	-0.32	-0.00392	-0.388	-0.0539	-0.157	-0.468	0.344	0.169	0.091	0.36	-0.422
ENPP5_HUMAN	ENPP5	-0.0357	0.195	-0.557	-0.242	0.172	-0.184	-0.241	0.479	0.0748	0.233	0.142	-0.224	0.358	-0.489	-0.497	0.412	0.187	-0.16	0.359	-0.493	-0.5	-0.286	0.0225	0.061	-0.406	0.308	0.0836	0.127	0.466	-1.16
ENPP6_HUMAN	ENPP6	0.428	0.128	-0.184	-0.0838	0.00413	-0.088	0.167	-0.206	0.0177	0.227	0.19	0.00138	0.152	0.199	0.197	-0.115	0.237	-0.123	-0.21	-0.064	-0.184	0.315	0.238	0.217	-0.0757	-0.00449	-0.0532	0.0549	-0.0176	-0.0935
ENTP4_HUMAN	ENTPD4	0.148	0.128	0.268	0.0404	0.344	0.134	0.207	-0.198	0.342	-0.624	0.146	-0.548	0.386	0.266	-0.0924	-0.209	0.138	-0.333	-0.0492	0.274	-0.0343	-0.0916	-0.0328	1.23	-0.187	-0.0924	0.11	-0.223	-0.0752	-0.0408
ENTP6_HUMAN	ENTPD6	-0.177	-0.287	-0.219	0.131	-0.138	-0.54	0.0199	0.312	-0.378	0.274	0.184	-0.372	0.186	-5.3e-05	-0.246	-0.176	0.148	-0.326	0.00315	-0.0394	-0.167	-0.546	0.0345	0.11	-0.171	0.16	0.0656	0.00379	0.0322	-0.209
EPCR_HUMAN	PROCR	0.042	0.262	-0.129	-0.304	-0.0113	0.117	0.112	-0.147	-0.0605	0.302	-0.113	0.282	0.219	-0.294	0.036	-0.00508	0.0714	0.0888	-0.293	-0.0681	-0.133	0.371	-0.0228	0.0101	0.145	-0.292	0.0876	-0.0548	-0.291	0.0996
EPDR1_HUMAN	EPDR1	0.125	-0.236	0.0485	0.24	-0.117	-0.236	0.0317	-0.607	0.211	-0.175	0.127	0.0864	0.0985	-0.154	0.26	-0.197	0.439	-0.311	0.209	-0.526	0.101	-0.408	0.0797	-0.459	-0.577	0.106	0.0386	0.0496	0.312	-0.341
EPHA4_HUMAN	EPHA4	0.0536	0.11	-0.321	0.317	-0.00506	0.158	-0.158	0.0727	-0.166	0.0143	0.292	-0.288	0.187	0.24	-0.163	0.0973	0.00808	-0.145	0.224	0.118	-0.307	-0.149	0.00358	0.0509	-0.336	0.307	-0.0295	-0.0158	0.231	0.00755
EPHA5_HUMAN	EPHA5	0.0941	0.181	-0.203	0.179	0.00335	0.202	-0.131	-0.0631	-0.054	0.0769	0.154	-0.0589	0.437	-0.173	-0.0471	0.103	-0.0126	-0.0542	0.17	-0.106	-0.324	-0.0672	0.00138	0.0344	-0.165	0.313	0.246	-0.0134	0.166	0.11
EPHA6_HUMAN	EPHA6	0.0152	-0.0625	-0.155	0.317	-0.0467	-0.203	-0.126	0.339	-0.0185	-0.15	0.0443	-0.418	0.134	0.0922	0.115	-0.0241	-0.089	0.0519	0.113	0.0366	-0.138	-0.273	0.0318	-0.111	-0.158	0.123	0.00363	0.143	0.474	-0.145
EPHA7_HUMAN	EPHA7	-0.0215	0.0668	-0.0111	-0.0516	-0.0509	0.139	-0.00367	-0.0141	0.0644	-0.0845	-0.1	-0.0309	0.0971	-0.117	-0.0272	-0.154	-0.0176	0.0839	-0.0418	-0.0469	-0.125	0.0445	-0.0846	0.0178	-0.108	0.101	0.06	0.0262	0.0954	-0.0121
EPHAA_HUMAN	EPHA10	-0.0683	0.204	0.113	0.0205	-0.0358	0.293	-0.0918	-0.161	0.145	-0.31	-0.0119	0.125	0.0707	-0.29	0.0174	0.394	-0.0304	0.225	-0.111	-0.0363	-0.226	0.0414	-0.151	-0.00221	-0.261	0.186	-0.137	-0.0579	-0.0682	0.156
EPHB2_HUMAN	EPHB2	0.0818	0.159	-0.22	-0.0395	-0.0678	0.0648	-0.104	-0.147	-0.0282	-0.239	0.235	0.0877	0.196	-0.188	-0.109	-0.0987	0.115	-0.0494	0.0224	0.0916	-0.285	-0.057	0.095	-0.172	-0.192	0.128	-0.00135	0.0343	0.041	0.126
EPHB3_HUMAN	EPHB3	-0.0584	0.0225	-0.212	0.272	0.0272	-0.0852	0.0199	0.0898	-0.0741	0.0335	0.141	-0.192	-0.0516	0.232	0.0782	-0.0474	0.0127	0.112	0.302	-0.0413	-0.129	-0.0629	-0.0695	-0.148	0.0584	0.162	0.0498	0.0121	0.164	0.137
EPHB6_HUMAN	EPHB6	0.00624	0.23	0.0437	-0.0781	0.0928	0.543	-0.186	-0.309	0.204	-0.638	-0.275	0.137	0.454	-0.512	-0.16	0.187	0.052	-0.0654	0.175	0.101	-0.168	0.242	-0.0157	-0.283	-0.541	0.316	0.0126	0.193	-0.0674	-0.0792
ERAP1_HUMAN	ERAP1	-0.0277	-0.0947	0.0763	0.238	-0.0387	-0.449	0.118	-0.147	-0.0166	0.114	0.425	-0.102	-0.0743	0.293	0.0135	-0.0204	0.223	-0.207	-0.231	0.196	0.165	0.316	0.0656	-0.0555	-0.0721	-0.175	0.0432	-0.0565	0.35	-0.305
ERAP2_HUMAN	ERAP2	-0.0986	-0.0905	0.605	0.0994	0.402	-0.451	-0.56	-0.08	0.153	0.141	-0.934	-0.813	-0.407	-0.0973	0.0169	0.502	0.646	-0.101	-0.0379	0.128	-0.277	-0.446	-0.491	0.0533	0.507	0.0506	0.0903	0.296	-0.632	0.0601
ERBB3_HUMAN	ERBB3	-0.00742	0.0708	-0.266	0.155	0.00265	-0.268	0.222	0.153	-0.00695	-0.0503	0.0173	-0.15	0.00721	0.181	0.225	-0.108	0.244	-0.401	-0.128	-0.113	0.11	-0.17	0.0401	-0.162	-0.0487	0.058	0.149	0.0288	0.13	-0.109
ERFE_HUMAN	ERFE	0.312	-0.124	0.419	-0.295	0.179	0.0345	-0.14	0.161	-0.281	0.251	0.166	0.00321	0.0938	-0.161	0.246	-0.288	0.0426	0.874	0.104	-0.205	-0.299	0.0094	-0.125	0.29	-0.056	-0.177	-0.211	0.0629	0.0292	0.167
ERP44_HUMAN	ERP44	-0.115	0.092	0.355	-0.073	-0.0632	-0.00698	-0.028	0.0131	-0.0602	0.137	-0.132	0.103	0.0702	0.0615	-0.0219	0.0509	0.307	0.0414	0.051	-0.0657	-0.0688	0.229	-0.0114	0.0191	0.05	-0.00576	-0.106	-0.0499	-0.118	0.245
ES1_HUMAN		-0.229	0.0401	-0.0962	0.172	-0.178	0.0353	-0.263	0.0517	0.358	-0.00467	-0.0257	-0.144	-0.146	0.409	0.308	0.0275	-0.305	-0.0636	-0.145	-0.0154	0.256	0.209	-0.326	0.214	-0.0629	-0.0461	0.113	-0.0332	0.112	0.106
ESAM_HUMAN	ESAM	-0.00195	0.122	-0.024	0.0706	-0.0163	0.16	-0.0569	-0.00238	0.117	-0.437	0.0829	-0.167	0.129	0.0928	0.0359	-0.162	-0.114	0.267	-0.155	0.00301	-0.241	-0.125	-0.00118	-0.323	0.0102	0.131	-0.165	0.0711	0.188	0.181
ESTD_HUMAN	ESD	0.187	0.205	0.371	-0.162	-0.154	0.242	-0.514	0.361	-0.0503	0.733	-0.1	-0.244	-0.453	-0.163	0.352	0.396	0.22	0.461	0.0849	-0.00353	-0.248	0.304	-0.13	0.925	0.00709	-0.00954	-0.386	-0.416	0.00155	0.152
ETBR2_HUMAN		-0.00478	0.0111	0.566	-0.0927	-0.293	0.399	0.0957	-0.267	0.11	-0.0585	-0.0374	0.0895	0.258	-0.16	0.0935	-0.358	0.0365	0.295	0.219	-0.346	0.869	-0.0299	0.305	-0.203	-0.00949	-0.309	0.164	-0.233	0.246	-0.0748
EXT1_HUMAN	EXT1	0.0738	0.165	0.0724	-0.0752	-0.045	0.005	-0.114	0.00464	0.127	-0.196	0.0363	-0.27	-0.074	-0.0251	-0.104	0.114	-0.0192	0.181	0.0427	0.166	-0.0658	0.0183	-0.0302	-0.0814	0.0347	-0.108	-0.0805	0.157	0.123	0.0595
EXT2_HUMAN	EXT2	-0.0573	0.0277	-0.0911	0.153	-0.00321	-0.129	0.000354	0.00759	0.0329	-0.0551	0.265	-0.115	-0.102	-0.0853	-0.122	0.073	0.0269	0.066	0.0253	-0.0652	0.0523	0.00988	-0.11	-0.164	0.0448	0.0649	0.0901	0.0683	-0.035	0.058
EXTL2_HUMAN	EXTL2	0.136	0.102	-0.142	0.0439	-0.0557	0.007	-0.427	0.00966	-0.158	0.129	-0.323	-0.239	0.192	-0.18	0.00477	-0.0648	0.0668	0.128	-0.0611	0.0169	-0.346	-0.287	0.206	-0.303	-0.0282	0.0248	-0.177	0.0902	0.244	0.0718
EXTL3_HUMAN	EXTL3	0.135	-0.0719	-0.0436	0.0895	-0.116	-0.177	-0.123	0.139	-0.0458	0.309	0.135	-0.293	0.0537	0.252	-0.0971	-0.00948	0.288	0.141	0.293	-0.123	-0.114	-0.245	0.104	-0.0222	-0.133	0.106	0.185	-0.0286	0.267	-0.124
EZRI_HUMAN	EZR	-0.0305	0.0246	0.0131	-0.132	0.264	-0.00858	-0.205	-0.0494	-0.105	0.222	-0.193	0.3	0.021	0.0246	0.106	-0.0992	-0.191	-0.0173	-0.271	-0.0214	0.0161	0.0204	0.061	0.228	-0.00135	-0.229	-0.0817	0.0422	-0.263	0.0542
F10A1_HUMAN	ST13	-0.292	-0.298	-0.141	0.228	0.329	-0.423	0.0719	0.371	-0.165	0.636	-0.0578	0.114	-0.148	-0.168	0.559	0.271	0.133	-0.404	-0.144	-0.322	0.434	0.14	0.18	0.119	0.108	-0.395	0.136	-0.0644	-0.408	-0.0998
F13A_HUMAN	F13A1	-0.0838	-0.263	-0.105	0.338	0.3	0.429	0.14	-0.375	-0.0438	0.206	0.439	0.433	-0.671	-0.319	-0.327	-0.144	0.274	-0.429	-0.13	0.138	0.302	-0.29	0.064	0.136	0.709	-0.406	-0.279	0.245	-0.149	-0.158
F13B_HUMAN	F13B	0.057	-0.0277	0.219	-0.302	0.186	0.0557	0.294	-0.701	0.0481	0.0415	0.212	0.87	-0.736	-0.256	-0.0368	-0.21	-0.122	-0.314	-0.188	0.123	0.474	0.245	-0.101	0.0353	0.654	-0.517	0.0669	-0.0652	-0.483	-0.248
F1711_HUMAN	FAM171A1	0.019	0.0149	-0.0443	0.164	0.0355	-0.395	0.104	0.36	-0.254	-0.0457	-0.0096	0.0282	0.0793	-0.418	-0.058	-0.0149	0.282	0.0665	-0.114	-0.103	-0.173	-0.0653	-0.0215	0.152	-0.0623	0.142	0.255	0.117	0.152	-0.217
F174A_HUMAN	FAM174A	-0.0569	-0.195	-0.544	0.535	-0.0258	0.0173	0.24	0.455	-0.23	0.0682	0.26	-0.599	0.258	0.522	-0.255	-0.238	-0.0831	-0.341	0.339	0.322	-0.0701	-0.446	0.0572	-0.327	-0.276	0.479	0.032	0.109	0.544	0.000191
F198A_HUMAN		0.173	-0.179	0.315	0.0622	-0.471	-0.555	0.0294	-0.125	0.18	-0.152	-0.354	0.0397	0.295	-0.23	-0.176	0.15	0.296	0.392	-0.338	-0.156	-0.602	0.162	0.136	0.00665	-0.197	0.309	0.193	-0.0923	-0.136	0.0678
F198B_HUMAN		0.0422	-0.139	0.38	-0.0725	0.0222	0.156	0.052	-0.0393	0.216	-0.0262	0.103	-0.21	0.016	-0.00438	0.0701	-0.186	0.205	0.0142	0.0434	0.0163	0.0202	-0.00585	0.0161	0.109	-0.0476	-0.136	-0.0674	-0.0875	-0.0203	0.0157
F19A5_HUMAN		-0.00015	0.0659	0.308	-0.0981	-0.0194	0.286	-0.095	-0.354	0.0707	-0.617	-0.256	-0.48	0.261	-0.152	-0.0548	-0.102	0.168	0.192	0.055	0.186	-0.52	-0.162	-0.157	-0.495	-0.265	0.293	0.0807	0.107	0.0346	0.185
F219B_HUMAN	FAM219B	-0.201	-0.439	0.149	-0.0466	-0.11	0.19	-0.0198	0.0423	0.266	-0.00217	-0.287	-0.181	-0.033	-0.253	0.104	0.00647	0.236	0.0932	-0.575	-0.162	0.237	-0.108	-0.235	0.0605	0.115	-0.419	0.0538	0.125	-0.431	0.284
F234A_HUMAN	FAM234A	-0.0835	-0.0835	-0.239	0.0591	-0.0641	0.0727	-0.166	-0.0853	-0.00875	-0.319	0.182	0.0542	-0.0469	-0.0682	0.126	0.0729	-0.0101	-0.0365	9.55e-05	-0.21	-0.23	0.145	-0.0738	-0.227	0.184	-0.0532	-0.00818	0.034	-0.135	-0.000733
F234B_HUMAN	FAM234B	0.33	0.0159	-0.16	0.0715	0.126	-0.0562	-0.198	-0.186	-0.146	0.0316	0.0382	0.00544	0.104	-0.083	0.12	-0.0658	0.288	-0.163	0.0978	-0.109	-0.238	0.0392	-0.0889	-0.0603	-0.334	0.204	-8.28e-05	-0.128	0.175	-0.0629
FA10_HUMAN	F10	0.0214	-0.182	0.0983	-0.0634	0.388	0.0213	0.531	-0.117	-0.0929	-0.0287	0.0594	0.569	-0.258	0.0402	-0.294	0.0226	-0.0687	0.0237	-0.135	0.346	0.612	0.188	0.0329	0.0502	0.683	-0.249	-0.00914	-0.228	-0.228	-0.0195
FA11_HUMAN	F11	-0.261	0.0184	0.373	-0.136	0.717	0.377	0.396	-0.367	0.152	-0.439	0.291	0.764	-0.74	-0.0556	-0.107	0.298	-0.223	-0.167	-0.0865	0.0313	0.362	0.324	0.247	0.43	0.711	-0.42	0.186	-0.116	-0.64	-0.0733
FA12_HUMAN	F12	0.158	0.0464	-0.662	-0.355	0.881	-0.0939	0.555	-0.558	0.267	-0.481	-0.394	1.02	-1.25	0.109	-0.334	-0.0228	0.415	-0.0876	0.0229	0.105	0.588	-0.024	0.00259	0.212	1.12	-0.508	0.129	-0.363	-0.598	-0.157
FA20A_HUMAN	FAM20A	-0.0212	-0.0979	-0.102	-0.0193	-0.0335	-0.212	0.31	-0.125	0.115	-0.216	0.105	0.116	-0.169	-0.000936	0.0848	-0.0203	-0.265	0.312	0.116	0.0165	0.571	0.165	0.0582	0.023	0.352	0.072	0.185	-0.0865	-0.157	0.0192
FA20C_HUMAN	FAM20C	0.0595	0.0646	0.196	-0.046	0.0552	0.114	-0.0505	0.0136	0.109	-0.117	-0.211	0.117	0.00696	-0.114	0.0666	0.0033	0.0353	0.0364	-0.0386	0.0202	-0.0279	0.0989	-0.0717	0.166	-0.0345	-0.0813	0.0704	0.0243	-0.155	-0.0544
FA49B_HUMAN	FAM49B	0.0626	0.139	-0.00978	0.00346	-0.0544	0.158	-0.00537	-0.124	0.016	-0.229	0.0628	0.28	-0.00622	-0.132	0.161	0.0287	0.036	-0.195	-0.0909	0.0777	0.0247	0.178	0.0981	0.165	-0.067	-0.0268	-0.0945	0.114	-0.149	-0.0294
FA5_HUMAN	F5	0.0264	0.177	0.606	-0.25	-0.239	0.000947	-0.0927	-0.435	0.262	-0.215	-0.252	0.154	0.327	-0.41	0.225	0.25	-0.0358	0.311	-0.441	-0.0779	0.0191	0.356	-0.00516	-0.5	-0.178	0.000767	0.103	0.145	-0.32	0.39
FA69C_HUMAN		0.143	0.0355	-0.00557	-0.0193	0.0252	-0.203	-0.0957	0.0985	-0.0801	0.00204	0.0302	-0.131	0.189	-0.172	-0.0279	0.152	0.17	0.124	0.00236	-0.00772	0.319	-0.0768	-0.0439	-0.0351	0.151	-0.0198	0.239	-0.0025	0.158	-0.0759
FA9_HUMAN	F9	-0.105	-0.0979	0.306	-0.167	0.448	0.182	0.749	-0.129	0.0588	-0.00608	0.0228	1.14	-0.188	-0.288	0.017	0.227	0.0455	-0.0522	-0.0946	0.397	0.772	0.386	0.206	0.109	1.07	-0.255	-0.104	0.089	-0.153	0.179
FAAA_HUMAN	FAH	-0.013	-0.278	-0.0331	0.0295	0.424	-0.269	-0.132	0.189	-0.108	0.8	0.263	0.302	-0.169	0.22	-0.11	0.34	-0.086	-0.293	-0.252	0.421	0.369	0.163	0.246	0.515	0.0425	-0.399	0.0941	-0.27	-0.0189	-0.109
FABP4_HUMAN	FABP4	0.522	-0.252	1.93	0.811	-0.413	-0.571	-0.746	0.73	-0.09	-0.071	0.0513	0.21	-0.318	0.528	0.401	-0.457	0.616	0.442	-1.24	0.12	1.22	0.848	-0.281	0.638	0.186	-0.933	0.524	-0.295	-0.933	-0.191
FABP5_HUMAN	FABP5	0.0918	-0.0145	-0.0107	0.0265	-0.0609	-0.231	-0.0984	0.318	-0.257	0.468	-0.165	-0.207	0.0882	0.171	0.414	-0.0272	0.0531	0.129	-0.0599	0.0676	-0.143	-0.137	0.0325	-0.262	0.284	-0.102	-0.18	0.0651	0.317	-0.0132
FABP7_HUMAN	FABP7	0.0142	-0.302	0.219	-0.0841	-0.462	-0.00644	0.122	0.0447	-0.27	-0.146	0.126	-0.211	-0.362	0.156	-0.211	-0.252	-0.003	0.14	0.402	-0.059	-0.148	-0.114	0.207	-0.0331	0.0159	-0.0711	-0.0899	0.125	0.115	0.133
FABPH_HUMAN	FABP3	-0.118	0.128	-0.0202	0.329	-0.00217	-0.0481	-0.0322	0.0507	0.12	-0.207	-0.115	-0.069	0.00294	0.281	0.0995	-0.149	0.0043	-0.226	0.118	0.286	0.232	-0.0364	-0.0135	-0.202	-0.041	0.164	0.223	0.143	0.113	-0.168
FAHD1_HUMAN	FAHD1	0.306	-0.0082	-0.53	-0.546	-0.399	0.118	-0.12	-0.176	0.136	0.234	0.256	0.521	0.075	-0.11	0.297	-0.229	-0.0389	0.388	0.135	0.119	-0.309	0.131	-0.0148	0.231	-0.517	0.0142	0.0269	0.0151	0.167	-0.368
FAM3A_HUMAN	FAM3A	0.0501	0.159	0.0617	0.00379	-0.145	-0.0441	-0.1	-0.0789	0.0931	-0.372	-0.0157	-0.112	-0.00254	-0.0571	-0.158	-0.0771	0.0892	0.307	0.0819	0.141	-0.294	-0.0548	0.0297	0.00464	-0.0705	-0.0696	0.0451	0.14	0.00146	0.166
FAM3B_HUMAN	FAM3B	-0.0261	-0.0287	0.187	-0.167	0.0394	0.273	0.261	-0.438	-0.396	0.759	-0.243	0.393	-0.0578	-0.39	0.203	0.391	-0.325	0.512	-0.333	-0.331	-0.275	0.256	-0.527	0.0734	0.416	0.396	-0.235	-0.08	-0.226	0.0131
FAM3C_HUMAN	FAM3C	-0.11	0.0791	-0.215	0.235	-0.0171	-0.0087	-0.0932	0.0892	-0.0747	-0.234	0.0415	-0.316	0.227	-0.0603	-0.0286	-0.104	-0.0202	-0.0324	0.107	0.0621	-0.404	-0.0904	0.1	-0.261	-0.233	0.153	-0.0202	0.102	0.0804	0.129
FAT1_HUMAN	FAT1	0.0483	-0.00458	0.0912	-0.14	-0.0192	-0.0751	0.0762	0.00192	-0.107	0.25	0.115	-0.0218	-0.0163	0.108	-0.049	-0.0853	0.0101	0.182	0.193	-0.106	0.104	-0.00948	0.186	0.0509	0.17	-0.083	-0.0121	-0.0824	-0.056	0.0857
FAT2_HUMAN	FAT2	0.0441	-0.194	-0.103	0.00161	-0.494	-0.0271	0.0777	-0.0673	-0.242	0.415	0.0688	-0.483	-0.407	0.193	0.109	-0.28	0.0219	0.347	0.365	-0.0605	-0.0821	-0.64	0.13	0.14	0.333	-0.323	-0.195	0.0257	0.0552	0.0595
FBLN1_HUMAN	FBLN1	0.0972	0.0835	0.0638	-0.128	-0.0464	-0.307	0.314	-0.235	0.0839	-0.496	-0.0272	-0.0268	-0.0944	0.191	-0.0996	-0.362	-0.0553	0.0994	-0.0492	0.332	-0.0562	-0.0971	0.0533	-0.438	0.156	0.132	-0.0371	0.0522	-0.0564	0.18
FBLN2_HUMAN	FBLN2	-0.0187	0.205	-0.233	0.459	0.0259	-0.245	0.17	-0.311	0.184	-0.469	-0.014	0.0701	0.0547	0.834	0.32	-0.171	-0.154	-0.133	-0.209	0.059	0.0691	-0.126	-0.0477	1.31	0.517	-0.068	-0.0762	-0.189	-0.085	-0.0525
FBLN3_HUMAN	EFEMP1	-0.0266	0.239	0.241	-0.105	-0.25	-0.0275	0.245	0.0251	0.212	-0.03	-0.119	-0.0138	0.0234	-0.0619	0.0598	-0.215	0.0105	0.191	0.273	0.193	0.242	-0.015	0.0122	-0.0709	0.0347	-0.139	-0.0558	0.166	-0.18	0.212
FBLN4_HUMAN	EFEMP2	-0.0387	-0.0768	-0.199	-0.075	-0.0731	-0.139	0.313	-0.181	0.0621	-0.23	0.108	0.154	-0.279	0.124	-0.114	0.0266	0.0366	-0.154	-0.124	0.0377	0.484	0.109	-0.0506	-0.187	0.0829	0.0636	-0.0171	-0.115	0.012	0.00283
FBLN5_HUMAN	FBLN5	0.00962	0.126	-0.0864	0.125	-0.26	-0.16	0.609	-0.00837	-0.0564	-0.198	0.13	-0.0977	-0.14	-0.135	-0.221	-0.117	-0.0378	0.055	0.233	0.245	0.546	-0.129	-0.0558	0.0524	0.228	-0.0201	0.0589	-0.0176	-0.0154	0.0231
FBLN7_HUMAN	FBLN7	-0.0127	-0.133	-0.367	0.0505	0.0848	-0.101	0.114	-0.0682	-0.0225	0.0667	-0.0345	-0.151	0.187	-0.163	0.0134	0.0135	0.204	-0.143	0.0896	-0.152	-0.12	-0.213	0.113	-0.0277	-0.0739	-0.0274	0.123	0.0534	0.0841	0.103
FBN1_HUMAN	FBN1	-0.0275	0.0322	0.0796	-0.372	-0.141	-0.119	0.22	-0.137	0.233	-0.493	-0.115	0.0351	0.112	-0.106	0.0928	0.00977	0.00105	-0.0548	-0.146	0.282	0.234	0.36	-0.0314	-0.317	0.325	-0.105	-0.162	-0.0487	-0.268	0.164
FCG2A_HUMAN	FCGR2A	0.248	0.548	0.0229	0.0781	0.267	0.549	-0.221	-1.07	-0.0564	-0.248	-0.259	0.634	0.00275	-0.541	0.598	-0.0799	-0.257	0.503	-0.0834	-0.107	-0.295	0.782	-0.478	-0.588	-0.363	0.17	0.00981	0.139	-0.0354	0.447
FCG3A_HUMAN	FCGR3A	0.197	0.0961	0.224	0.158	0.0123	-0.00903	0.141	-0.267	0.0569	-0.769	0.00284	0.623	-0.323	-0.0548	0.21	-0.189	0.0524	-0.0975	-0.239	-0.116	0.102	0.789	-0.218	-0.312	0.103	-0.268	0.0312	-0.125	-0.287	0.146
FCGBP_HUMAN	FCGBP	-0.0056	0.481	-0.564	0.119	-0.139	0.0273	0.0474	0.192	0.00297	-0.376	0.0217	0.385	-0.209	-0.474	0.07	-0.527	0.28	0.413	-0.194	-0.52	0.574	0.202	-0.334	0.0108	0.31	-0.306	0.137	-0.276	0.112	0.0631
FCGRN_HUMAN	FCGRT	-0.0756	-0.201	0.0575	-0.143	0.28	0.325	0.257	-0.0192	0.0832	0.504	0.0398	0.588	-0.208	-0.00291	-0.0096	-0.106	-0.0323	0.114	-0.215	0.258	-0.148	0.355	-0.257	0.423	0.0785	-0.145	0.102	-0.193	-0.212	-0.13
FCN3_HUMAN	FCN3	0.0873	-0.348	-0.197	0.0288	0.795	0.0987	0.275	-0.0288	-0.0692	0.483	0.519	0.796	-0.107	-0.0436	-0.163	-0.106	-0.176	-0.416	-0.101	0.76	0.793	0.216	0.487	0.256	0.907	-0.383	0.156	-0.0844	-0.489	-0.0382
FETUA_HUMAN	AHSG	0.229	-0.582	0.0961	-0.26	0.353	0.246	0.5	-0.446	-0.0117	-0.19	0.482	0.426	-0.762	0.0596	-0.119	-0.507	0.309	-0.326	-0.106	-0.101	0.882	0.463	0.273	0.00654	0.463	-0.501	-0.174	0.0975	-0.554	0.0658
FETUB_HUMAN	FETUB	0.0231	-0.248	-0.0347	-0.251	0.586	0.818	0.0551	-0.362	-0.164	0.378	0.477	0.538	-0.239	0.0239	-0.293	-0.255	0.191	-0.826	-0.313	0.518	0.413	0.843	0.132	0.149	0.682	-0.493	0.527	-0.101	-0.551	-0.146
FGFP2_HUMAN	FGFBP2	-0.269	-0.0771	-1.34	0.229	-0.427	-0.0589	0.672	0.25	1.31	-0.634	-0.237	0.231	-0.701	1.24	-0.364	0.146	-0.552	-0.0685	0.17	0.0646	0.165	-0.108	1.85	-0.037	0.308	0.0371	-0.321	0.0281	-0.299	0.28
FGFR1_HUMAN	FGFR1	-0.156	0.0944	0.0911	-0.0645	-0.183	0.0701	-0.154	-0.0261	-0.113	-0.305	-0.177	-0.332	-0.0153	0.108	0.0406	-0.245	0.17	0.146	0.212	0.0529	-0.0938	0.0177	0.218	-0.0363	0.00216	-0.117	-0.191	0.0755	-0.0636	0.176
FGFR2_HUMAN	FGFR2	-0.0901	0.131	-0.217	-0.0529	0.00891	0.0628	-0.145	0.0623	-0.0574	0.0939	0.03	-0.14	0.234	-0.0406	-0.0565	-0.0347	0.126	0.15	-0.0744	-0.0903	-0.28	-0.0203	0.0364	0.271	-0.113	0.13	-0.132	0.0888	0.0339	-0.205
FGFR3_HUMAN	FGFR3	0.0244	0.119	-0.179	0.201	-0.133	0.0279	-0.133	0.0598	-0.0967	-0.13	-0.0974	-0.223	0.217	0.0447	0.0266	-0.0493	0.0108	0.118	0.00664	0.00842	-0.223	-0.0547	-0.0352	0.14	-0.105	0.122	-0.051	-0.0777	0.185	-0.112
FGL2_HUMAN	FGL2	0.0217	0.428	0.0252	-0.361	-0.274	-0.219	0.317	0.0399	0.135	-0.478	0.0933	-0.0113	-0.396	-0.224	-0.179	0.159	0.0764	0.0821	-0.274	0.0987	0.208	0.162	-0.0791	-0.378	-0.00952	-0.138	0.225	0.0972	-0.228	0.0374
FHR1_HUMAN	CFHR1	-0.565	-0.543	0.4	-0.454	-0.231	0.379	0.0972	-0.147	-1.17	-0.457	-0.0329	0.284	-1.13	-0.0358	-0.0241	-0.844	0.0161	-0.0133	-0.131	0.404	-0.596	0.52	0.186	-0.854	0.254	-0.671	0.324	0.206	-0.594	0.102
FHR2_HUMAN	CFHR2	-0.0676	-0.612	0.132	-0.0236	0.354	-0.0479	0.0261	-0.434	0.95	-0.352	0.478	1.04	-1.12	-0.209	0.0315	-0.907	0.445	0.276	-0.29	0.45	0.905	0.808	0.182	-0.714	0.825	0.04	0.604	0.299	-0.186	-0.251
FIBA_HUMAN	FGA	-0.0976	-0.231	1.17	-0.524	0.715	0.168	-0.0595	-0.333	-0.516	0.731	0.315	1.26	-0.623	-0.0755	-0.192	-0.206	0.194	-0.852	-0.61	0.52	0.759	0.993	0.48	0.0942	1.45	-0.452	0.0239	0.339	-0.626	-0.0213
FIBB_HUMAN	FGB	0.0138	-0.148	1.34	-0.281	0.519	0.467	-0.108	0.0273	-0.17	0.641	-0.0398	1.47	-0.298	-0.426	0.0481	-0.244	0.421	-0.302	-0.264	0.151	0.0548	1.5	0.505	-0.228	1.59	-0.306	0.189	0.51	-0.163	0.216
FIBG_HUMAN	FGG	-0.0885	-0.249	1.6	-0.422	0.623	0.924	-0.418	0.162	-0.397	1.1	0.17	1.64	-0.352	-0.292	-0.0523	-0.315	0.657	-0.367	-0.36	0.107	0.187	1.61	0.546	-0.35	1.93	-0.462	0.271	0.797	0.0419	0.237
FIBIN_HUMAN	FIBIN	0.0065	0.164	0.497	-0.403	-0.124	0.248	0.0716	-0.213	0.16	0.00366	0.0218	0.0811	0.287	-0.546	-0.147	-0.0826	0.0633	0.45	-0.132	0.0291	-0.362	0.56	0.201	-0.168	0.00727	-0.281	-0.0318	-0.223	-0.271	-0.133
FINC_HUMAN	FN1	-0.124	-0.0261	-0.192	0.223	-0.148	-0.136	0.134	0.164	0.245	-0.137	-0.0474	-0.0764	0.236	-0.0253	0.0389	-0.268	-0.22	-0.0436	0.177	0.43	0.251	-0.202	0.274	-0.0851	0.00401	0.15	0.0189	-0.208	0.135	0.241
FJX1_HUMAN	FJX1	-0.122	0.168	0.353	-0.135	-0.077	-0.0132	-0.0643	-0.023	0.102	-0.432	0.144	-0.239	-0.0542	-0.223	0.122	-0.0897	0.157	0.181	-0.00891	0.25	-0.0351	-0.0411	0.0551	0.0167	0.198	-0.226	-0.000835	0.155	-0.074	0.0388
FKB1A_HUMAN	FKBP1A	0.0197	0.249	0.144	-0.189	0.093	0.231	-0.525	-0.472	0.0349	0.102	-0.288	0.287	0.337	-0.461	-0.015	0.265	-0.261	-0.0348	-0.0798	-0.12	-1.27	0.199	0.0287	0.218	-0.227	0.019	-0.0484	-0.0277	-0.217	0.00775
FKBP2_HUMAN	FKBP2	-0.128	0.174	0.236	-0.17	-0.138	0.175	0.111	-0.0491	-0.00896	-0.047	0.0671	-0.311	-0.122	0.0016	-0.11	0.00581	-0.084	0.0455	0.159	0.214	-0.125	-0.172	0.0123	-0.382	0.0663	-0.0316	-0.158	0.129	0.0461	0.0792
FKBP4_HUMAN	FKBP4	0.281	-0.22	0.323	0.0513	0.26	0.394	-0.189	0.151	-0.356	0.0816	0.422	-0.463	-0.406	0.198	0.0108	-0.395	0.245	-0.921	0.258	-0.0402	-0.122	0.00194	-0.314	0.208	0.341	-0.188	-0.353	0.158	-0.24	0.0557
FKBP9_HUMAN	FKBP9	0.258	0.188	0.204	-0.177	-0.0338	-0.132	0.18	0.0217	-0.0497	0.253	0.0271	0.0285	-0.161	0.198	-0.0562	-0.232	0.0155	-0.00256	0.227	-0.303	0.437	0.202	-0.0231	0.033	0.1	-0.146	-0.0105	-0.262	0.00468	-0.0497
FKRP_HUMAN	FKRP	-0.0643	0.115	-0.202	0.133	-0.0485	-0.326	-0.108	0.167	0.0249	-0.297	0.12	-0.285	0.209	0.137	0.0285	-0.241	0.122	0.0265	0.203	-0.284	-0.234	-0.384	0.089	-0.0457	-0.205	-0.202	0.252	0.0743	0.114	0.03
FLNA_HUMAN	FLNA	-0.417	0.0048	-0.159	-0.101	0.424	-0.368	-0.143	0.318	0.12	0.92	-0.0895	0.473	0.212	0.0136	0.272	0.132	-0.184	-0.337	-0.166	0.407	0.413	-0.012	0.226	0.629	0.0132	-0.33	0.191	-0.152	-0.125	-0.156
FLNC_HUMAN	FLNC	-0.176	-0.000902	-0.0693	0.0419	0.0136	-0.443	0.206	-0.0667	-0.0277	0.0593	0.0782	-0.0306	0.167	0.0623	0.0191	-0.183	0.193	-0.197	-0.216	0.0618	0.355	0.0506	0.047	-0.0623	0.114	0.027	0.158	-0.138	-0.0522	-0.189
FLRT1_HUMAN	FLRT1	-0.0316	0.205	-0.177	0.128	-0.0596	0.102	-0.118	-0.102	0.15	-0.1	0.0329	0.0137	-0.0177	0.0845	-0.198	0.0538	-0.0795	-0.286	0.139	0.011	-0.111	0.038	0.0488	-0.02	-0.239	0.283	-0.0167	-0.0122	0.109	0.0398
FLRT2_HUMAN	FLRT2	-0.0193	-0.000452	0.142	-0.176	0.0561	0.245	0.00983	-0.00477	0.191	-0.0359	-0.0219	-0.0752	-0.133	-0.0429	-0.174	0.111	-0.0158	0.0245	0.116	-0.0184	0.132	0.0475	-0.0359	0.121	0.0159	-0.0938	-0.132	-0.053	0.0953	-0.142
FLRT3_HUMAN	FLRT3	0.0794	-0.599	-0.0633	-0.166	0.167	-0.0137	0.261	-0.531	0.0448	-0.432	0.0339	0.252	-0.0999	0.127	-0.24	-0.185	-0.0531	0.0648	0.00193	-0.351	0.492	0.204	0.118	-0.0842	0.184	-0.252	-0.0723	-0.0498	-0.484	0.0385
FLT3L_HUMAN	FLT3LG	0.344	0.135	0.0568	-0.265	-0.126	-0.143	0.0269	-0.411	0.365	-0.311	-0.338	-0.0727	0.355	-0.0604	-0.103	0.00144	-0.00165	0.0426	-0.015	0.573	0.042	0.287	-0.184	-0.695	-0.586	-0.2	-0.321	-0.393	-0.156	-0.111
FMOD_HUMAN	FMOD	0.12	0.201	0.207	-0.639	-0.148	-0.275	0.0804	-0.019	0.401	0.353	-0.094	0.61	-0.202	-0.104	0.0733	0.201	-0.0996	0.471	-0.119	0.139	0.249	0.466	-0.0582	0.0172	0.0344	-0.191	0.205	0.0152	-0.538	-0.0104
FNDC1_HUMAN	FNDC1	0.0795	-0.141	0.308	-0.362	-0.301	-0.0213	-0.0773	-0.0996	0.242	0.108	0.303	0.108	-0.223	-0.492	0.0324	-0.172	0.182	-0.2	0.0503	-0.135	0.118	0.292	-0.0853	-0.163	-0.229	0.00181	0.109	0.0599	-0.439	0.0231
FOLH1_HUMAN	FOLH1	-0.198	0.0128	0.27	0.0291	0.0217	-0.705	0.095	0.289	-0.169	0.382	-0.435	0.0239	0.282	-0.0534	0.342	0.161	-0.03	-0.266	-0.369	0.353	-0.126	0.274	0.226	0.235	-0.35	-0.352	0.31	0.274	0.405	-0.359
FPPS_HUMAN	FDPS	-0.00213	-0.109	-0.0946	-0.255	0.176	0.177	0.0223	0.0402	0.0862	0.296	-0.0349	0.0788	-0.0635	-0.0105	0.188	-0.148	0.0184	0.256	-0.056	-0.0404	-0.00211	-0.101	-0.0396	0.35	-0.1	0.111	0.0414	-0.225	0.0221	0.00199
FREM2_HUMAN	FREM2	-0.263	-0.233	-0.121	0.044	0.0958	0.0734	0.0602	-0.0495	-0.113	0.0464	0.139	-0.0539	0.00983	-0.0841	0.102	-0.386	0.176	0.103	0.102	-0.12	-0.0503	-0.226	-0.157	0.0941	0.164	-0.0389	-0.0213	0.0513	0.148	-0.0276
FRIH_HUMAN	FTH1	-0.187	0.0146	0.312	0.148	-0.094	0.207	0.279	0.0743	-0.135	0.0289	-0.313	-0.0044	-0.0538	-0.189	0.374	-0.16	0.384	0.177	0.00616	-0.0307	0.674	-0.226	-0.0366	0.192	-0.17	-0.0905	0.177	0.109	0.0303	-0.0691
FRIL_HUMAN	FTL	0.0334	0.17	-0.072	-0.213	-0.0695	0.224	0.344	0.192	-0.2	0.327	-0.263	-0.321	-0.543	-0.122	0.445	0.226	0.0719	-0.0471	0.116	-0.125	0.734	-0.245	-0.24	0.0791	-0.0608	-0.0711	0.0586	-0.109	0.0735	-0.17
FRS1L_HUMAN	FRRS1L	-0.149	0.154	0.124	-0.143	0.0267	0.298	-0.286	-0.24	0.0406	-0.386	-0.3	-0.134	0.158	-0.395	-0.442	0.0217	0.0492	0.252	0.0513	0.00166	-0.477	0.0797	-0.119	-0.301	0.0222	0.0339	0.117	0.0823	-0.313	-0.122
FSCN1_HUMAN	FSCN1	-0.0925	0.0825	0.0333	0.0289	-0.0664	0.265	-0.17	-0.273	-0.084	-0.129	-0.0116	0.173	0.0725	0.0304	-0.018	0.0367	0.0794	-0.212	-0.264	-0.151	-0.111	-0.00901	0.0394	0.197	0.103	-0.0525	-0.257	0.109	-0.0719	0.0363
FSTL1_HUMAN	FSTL1	-0.0463	0.0162	0.129	-0.211	-0.0858	-0.357	0.142	-0.0531	0.0883	-0.121	-0.0472	-0.148	0.19	-0.0966	0.0233	-0.183	0.0136	-0.0456	0.011	0.0494	-0.0123	0.0676	-0.134	-0.441	0.173	-0.0493	-0.195	0.102	0.0232	0.00853
FSTL3_HUMAN	FSTL3	0.0582	0.287	0.269	0.0436	-0.0455	0.0881	0.361	-0.175	0.175	-0.341	0.0378	0.309	0.0411	-0.205	-0.218	-0.272	-0.0434	0.116	-0.11	0.0579	0.431	0.106	0.0293	-0.2	0.33	-0.243	0.0157	-0.0131	-0.222	0.167
FSTL4_HUMAN	FSTL4	0.189	-0.0966	0.0221	0.357	-0.0886	-0.258	-0.132	0.0413	-0.204	-0.0615	0.136	-0.17	0.171	-0.289	0.156	0.0052	0.0171	0.0205	0.13	-0.486	-0.169	-0.299	0.0549	-0.26	-0.282	0.407	0.201	0.0405	0.329	-0.199
FSTL5_HUMAN	FSTL5	0.017	0.013	0.149	-0.00576	0.0825	0.0633	-0.182	-0.381	-0.274	0.181	0.147	-0.313	-0.0976	0.0723	-0.0185	-0.284	0.0235	0.143	0.406	-0.29	-0.0715	-0.479	0.0917	-0.11	0.234	-0.0648	0.00719	-0.0496	0.205	-0.0636
FUCO_HUMAN	FUCA1	0.0746	0.225	0.164	-0.332	-0.178	0.116	-0.646	0.0686	-0.0173	-0.187	0.159	0.158	0.147	-0.00623	0.276	-0.624	0.31	0.367	-0.316	-0.362	0.0768	-0.373	-0.28	-0.237	0.0541	0.0253	0.056	-0.0598	0.136	0.0503
FUCO2_HUMAN	FUCA2	-0.214	0.316	-0.288	-0.185	-0.478	-0.194	-1.1	0.253	-0.0158	0.164	0.277	-0.105	0.16	0.357	0.333	-1.1	0.413	0.122	-0.51	-0.299	0.198	-0.529	-0.257	-0.428	0.397	0.172	0.0742	-0.285	0.547	0.0661
FUT1_HUMAN	FUT1	-0.263	0.118	0.0156	-0.295	0.213	0.0923	-0.547	0.075	-0.303	0.468	0.567	-0.089	-0.338	0.491	-0.081	0.0685	-0.14	-0.174	0.578	0.194	-0.17	0.527	-0.0852	0.0695	0.27	-0.29	0.112	-0.0589	-0.259	-0.0659
FUT10_HUMAN	FUT10	-0.158	-0.157	0.0267	0.187	-0.104	0.0958	0.148	-0.0792	0.299	-0.0974	-0.252	0.0744	-0.0741	-0.573	0.0152	-0.214	0.0995	0.155	-0.0135	-0.386	-0.16	-0.145	-0.0164	-0.34	0.114	-0.0452	0.215	0.0773	0.0169	0.11
FUT11_HUMAN	FUT11	-0.0868	0.215	0.0293	0.0789	-0.0218	0.0298	-0.226	0.0865	0.241	0.0761	-0.0598	0.249	-0.000334	-0.181	0.0361	0.0896	0.177	0.038	-0.252	-0.346	1.05	0.129	-0.0606	-0.11	-0.0263	-0.113	-0.0555	-0.0193	0.123	0.0173
FUT8_HUMAN	FUT8	0.0835	-0.0784	-0.107	-0.0709	0.0376	-0.0497	0.101	0.0195	-0.225	0.153	-0.0869	0.331	0.0718	-0.124	-0.193	0.0733	-0.192	0.265	0.0853	-0.0491	0.194	-0.0682	-0.0924	-0.258	0.0251	0.238	0.151	-0.0169	-0.000116	0.255
FXYD6_HUMAN	FXYD6	0.0545	0.514	0.533	-0.26	0.132	0.00336	-0.111	-0.294	-0.239	-0.0258	-0.27	0.459	0.193	-0.739	0.184	-0.29	-1.43e-06	0.551	-0.079	-0.272	-0.606	0.145	0.318	-0.0774	0.338	0.0188	-0.184	0.141	-0.129	0.328
G3P_HUMAN	GAPDH	0.261	-0.185	-0.0264	0.415	-0.167	-0.484	-0.334	0.786	-0.193	1.05	0.824	0.266	-0.0763	-0.289	0.4	0.0662	-0.191	-0.322	0.387	-0.4	0.582	-0.0317	-0.427	0.833	-0.371	0.0322	0.441	-0.0983	0.227	0.0315
G3ST4_HUMAN	GAL3ST4	-0.162	0.41	-0.231	0.211	-0.0653	-0.253	-0.0327	0.289	0.104	0.0188	0.0208	-0.149	-0.223	0.0101	0.0167	0.0833	-0.18	0.224	-0.107	0.175	0.0779	-0.239	0.0579	-0.0892	0.305	0.208	0.0336	0.221	0.193	0.377
G6PD_HUMAN	G6PD	-0.0555	-0.148	0.114	-0.84	-0.149	0.125	-0.371	0.579	-0.382	1.36	-0.409	-0.144	-1.04	0.354	0.632	0.574	-0.728	-0.638	-0.564	-0.66	0.441	-0.402	0.0385	1.23	-0.108	-0.345	-0.104	0.0736	-0.572	-0.0472
G6PE_HUMAN	H6PD	-0.065	-0.0752	-0.0557	-0.311	0.169	0.0345	0.09	-0.231	0.24	0.0433	0.0661	0.383	-0.115	-0.0341	0.294	0.0313	-0.097	-0.192	-0.0522	-0.0812	0.289	0.0946	-0.049	0.263	0.108	-0.328	0.0358	-0.127	-0.231	0.0609
G6PI_HUMAN	GPI	0.097	-0.405	-0.164	0.29	-0.102	-0.673	-0.124	0.239	-0.163	0.145	0.063	-0.434	-0.169	-0.0901	0.347	-0.112	0.192	-0.0607	0.283	-0.146	-0.0935	-0.16	-0.397	0.117	-0.626	0.0843	0.188	0.0389	0.214	-0.195
GALNS_HUMAN	GALNS	-0.0696	-0.264	-0.253	0.0479	0.0819	-0.0257	-0.0232	0.377	-0.143	0.888	-0.222	8.82e-05	0.0723	0.0656	0.304	0.185	0.409	-0.0496	-0.0253	-0.353	-0.149	0.117	0.213	0.206	-0.342	0.233	0.029	-0.0404	0.128	-0.193
GALT1_HUMAN	GALNT1	0.00748	0.0467	-0.148	0.102	-0.168	-0.0318	-0.0622	-0.0111	-0.0704	0.037	0.0151	-0.0626	0.164	0.00488	-0.059	-0.0417	0.011	-0.0498	0.014	0.0585	-0.0997	0.109	-0.0633	-0.245	-0.0909	0.058	-0.0523	0.0501	-0.0196	0.0498
GALT2_HUMAN	GALNT2	-0.0221	0.0585	0.22	-0.14	0.00425	0.151	-0.00791	-0.21	0.044	-0.194	-0.178	0.16	0.0076	-0.163	0.0633	-0.0565	0.154	0.0754	-0.0639	-0.0251	-0.223	0.0526	-0.0754	-0.209	-0.0304	0.061	-0.113	0.134	-0.0874	0.203
GALT4_HUMAN	GALNT4	-0.237	0.0288	0.0102	-0.22	0.131	-0.0598	-0.0668	0.116	0.103	-0.0625	-0.0599	-0.162	0.183	0.0131	0.122	-0.23	0.031	-0.14	0.00874	0.0608	0.0665	-0.122	0.0213	-0.0196	0.341	0.048	-0.109	-0.052	-0.0139	-0.0505
GALT5_HUMAN	GALNT5	-0.189	-0.075	0.267	-0.0902	0.113	0.0683	-0.158	0.0491	0.927	-0.141	-0.0168	-0.323	0.0768	0.17	0.169	-0.152	-0.0697	0.238	0.131	-0.202	0.0902	-0.12	0.112	-0.338	0.0716	-0.197	0.117	0.0207	0.0855	0.278
GALT6_HUMAN	GALNT6	0.0347	-0.181	-0.0798	0.246	0.438	-0.292	0.459	-0.441	0.137	-0.34	-0.159	-0.297	-0.292	0.178	0.407	-0.0886	0.423	-0.252	0.0549	-0.00485	-0.376	0.00784	0.615	-0.522	-0.185	0.000755	0.214	0.218	0.0997	-0.0754
GALT7_HUMAN	GALNT7	0.0121	0.0624	-0.00568	0.132	-0.273	0.0178	-0.0389	7.67e-05	0.00683	-0.0934	0.142	-0.161	0.114	0.0647	-0.00514	-0.12	-0.257	-0.0534	0.0367	0.112	-0.112	-0.113	-0.152	-0.153	-0.00717	0.0954	-0.0305	0.0359	0.103	0.0771
GANAB_HUMAN	GANAB	-0.00436	0.0149	-0.092	-0.0677	-0.0637	-0.156	-0.137	0.16	-0.0945	0.228	0.038	-0.147	-0.0469	0.024	-0.012	-0.0816	0.203	0.0952	0.0695	-0.000162	-0.265	-0.075	0.0282	0.0364	0.0124	0.00415	0.0976	-0.0859	0.127	-0.065
GAPR1_HUMAN	GLIPR2	-0.0218	-0.342	-0.0251	-0.172	0.438	0.177	-0.107	0.0368	0.0102	0.354	0.305	0.363	-0.538	-0.0457	0.00462	0.293	-0.0747	-0.279	-0.105	0.274	0.247	0.0529	0.15	0.386	0.477	-0.0921	-0.0309	-0.116	-0.263	-0.0017
GAS6_HUMAN	GAS6	-0.0865	0.0138	-0.141	0.0841	-0.0143	-0.0507	-0.00808	0.402	-0.0343	0.792	0.0189	0.0322	-0.0324	-0.011	-0.145	0.516	0.18	0.052	-0.0328	-0.0161	-0.228	0.0586	0.032	0.291	0.278	0.312	-0.0964	0.0932	0.067	0.0199
GBRAP_HUMAN	GABARAP	0.0959	0.0718	0.176	-0.339	-0.000537	-0.0956	0.00576	-0.279	0.251	-0.591	-0.245	-0.162	0.101	-0.163	0.0534	-0.148	0.24	0.336	-0.0568	0.0941	-0.0356	0.185	-0.114	0.0636	0.104	-0.181	-0.193	0.109	0.239	-0.167
GBRL2_HUMAN	GABARAPL2	0.0335	-0.0425	-0.234	0.403	0.0451	-0.177	0.216	0.262	-0.093	0.271	0.205	-0.549	-0.0793	0.208	-0.122	-0.0259	0.0404	-0.0499	0.262	0.126	0.0239	-0.243	-0.144	-0.0542	-0.00968	0.229	-0.129	0.0955	0.461	-0.168
GDF10_HUMAN	GDF10	0.302	-0.221	0.127	-0.131	-0.0863	0.264	-0.128	-0.0291	-0.111	0.442	0.0129	0.111	0.211	-0.0944	-0.47	0.0907	0.0597	-0.14	0.12	0.175	-0.201	-0.0345	0.0616	-0.285	0.0814	0.385	-0.0837	-0.233	0.305	0.337
GDF11_HUMAN	GDF11	-0.0324	-0.0666	0.18	-0.0925	0.0261	0.0416	-0.0801	0.0373	-0.198	0.137	-0.0188	0.053	0.0848	-0.26	-0.0316	0.00607	-0.0739	0.27	0.0894	-0.0961	-0.119	0.0599	-0.0405	-0.166	0.0166	0.144	-0.079	0.0784	-0.151	0.1
GDF15_HUMAN	GDF15	-0.213	0.033	0.13	0.0447	-0.241	0.0102	0.0832	-0.118	0.18	-0.843	-0.28	0.0805	-0.405	-0.602	0.172	-0.272	0.149	-0.281	-0.493	0.441	0.382	-0.159	-0.432	0.532	0.0494	-0.205	-0.0108	-0.106	0.102	-0.0811
GDF8_HUMAN	MSTN	0.0649	-0.00965	-0.0533	0.171	-0.059	-0.111	0.232	0.00878	-0.24	0.301	0.282	-0.231	-0.138	0.0036	-0.127	-0.132	-0.0384	0.0033	0.425	0.118	-0.165	-0.229	-0.171	0.111	0.203	-0.0374	-0.161	0.3	0.307	0.0275
GDIA_HUMAN	GDI1	0.0307	0.0426	-0.104	-0.0159	-0.131	-0.0198	-0.118	0.152	-0.0304	0.314	-0.113	-0.258	0.00738	-0.0437	0.0157	0.0621	-0.0638	0.0178	0.0743	0.215	-0.282	-0.0319	-0.0251	0.021	-0.13	0.154	0.0715	0.0817	0.0737	0.017
GDIB_HUMAN	GDI2	0.0248	-0.11	-0.132	0.093	0.123	-0.106	-0.0882	0.494	-0.125	1.02	-0.0246	0.113	0.11	0.239	0.0152	0.439	-0.0922	-0.19	0.0667	0.0543	-0.148	-0.2	-0.0594	0.712	-0.0793	-0.0386	-0.00876	0.038	0.132	-0.133
GDIR1_HUMAN	ARHGDIA	-0.1	-0.206	-0.13	0.07	0.188	-0.134	-0.0206	0.49	-0.114	0.684	-0.0755	0.191	-0.0798	0.613	0.193	0.0534	-0.0413	-0.221	0.0192	-0.061	0.408	0.0417	-0.0539	0.647	0.187	-0.0612	0.0438	0.018	0.00343	-0.0848
GDIR2_HUMAN	ARHGDIB	-0.0305	0.0143	-0.151	0.135	0.439	-0.202	0.0434	0.314	-0.147	0.776	0.306	0.497	-0.21	-0.00698	-0.206	0.136	-0.0443	-0.233	-0.228	-0.143	0.17	-0.093	0.392	0.573	0.392	-0.117	-0.0132	0.139	-0.0834	-0.143
GDN_HUMAN	SERPINE2	0.0366	-0.19	0.201	0.737	-0.345	-0.369	0.292	-0.107	0.539	-0.954	-0.284	-0.533	0.334	-0.697	-0.328	0.0392	0.258	0.625	1.05	-0.053	-0.295	-0.122	0.0307	-0.599	-0.515	0.634	0.0705	0.0621	0.86	-0.2
GELS_HUMAN	GSN	-0.118	-0.00159	-0.0834	0.255	0.128	-0.138	0.537	0.231	-0.0222	-0.341	0.0802	-0.103	-0.28	0.327	0.0308	-0.246	0.297	-0.132	0.0749	0.423	0.541	-0.0661	0.406	-0.0234	0.375	-0.154	-0.0495	-0.0355	-0.193	0.103
GFAP_HUMAN	GFAP	-0.189	0.0337	0.316	-0.0918	0.217	-0.079	0.311	0.133	0.115	-0.148	-0.101	0.212	-0.0442	-0.219	0.31	-0.051	0.0373	0.0459	-0.365	0.0361	0.039	0.126	0.0668	0.261	-0.105	-0.341	0.0544	0.16	-0.32	-0.0761
GFRA1_HUMAN	GFRA1	0.125	0.0236	-0.164	0.124	-0.0406	-0.149	0.0347	-0.315	-0.00475	-0.279	-0.0196	-0.279	0.154	-0.134	-0.112	0.0402	0.0564	-0.0402	0.146	-0.24	-0.0193	-0.0227	-0.0055	-0.153	-0.0475	0.194	-0.0185	0.0281	-0.205	0.172
GFRA2_HUMAN	GFRA2	0.00623	0.125	-0.0907	0.205	0.135	0.362	-0.0639	-0.0289	0.0658	-0.308	-0.165	0.145	0.354	-0.154	-0.241	0.205	-0.0673	-0.103	-0.0878	-0.0889	-0.0555	0.0382	-0.166	-0.285	-0.352	0.381	0.0921	-0.0316	0.231	0.0424
GFRP_HUMAN	GCHFR	-0.0301	-0.0787	0.0458	0.371	0.476	-0.145	0.364	0.202	0.471	0.62	0.143	-0.142	-0.499	-0.345	0.254	0.276	0.159	0.328	-0.28	-0.0359	-0.125	0.138	-0.223	0.166	0.11	0.0465	0.197	-0.36	-0.115	-0.063
GGCT_HUMAN	GGCT	-0.0997	0.000578	-0.112	-0.0853	-0.0511	0.377	-0.0791	-0.0706	-0.0688	0.0285	0.0411	-0.0366	0.287	-0.0474	-0.204	0.0329	-0.206	0.101	0.069	0.0222	-0.296	0.0803	-0.0668	-0.0109	-0.244	0.0308	-0.146	0.1	0.0893	0.0364
GGH_HUMAN	GGH	0.177	-0.126	0.238	-0.136	-0.151	-0.179	0.0696	-0.342	0.0152	0.128	0.126	0.0826	-0.0425	-0.0633	-0.0295	-0.0403	0.208	0.014	0.00336	-0.229	-0.0654	-0.0831	0.262	-0.0769	0.00474	-0.0354	0.0303	0.0442	0.085	-0.146
GGT7_HUMAN	GGT7	0.00885	0.0195	-0.0762	0.0695	-0.0163	0.0202	-0.163	-0.0934	0.135	-0.229	-0.0208	-0.00436	0.137	-0.0753	-0.0367	-0.0297	0.0249	0.0776	0.127	-0.15	-0.00508	0.0237	0.0367	-0.148	0.044	0.0317	-0.0656	-0.00615	0.191	-0.0259
GILT_HUMAN	IFI30	0.129	0.201	0.569	-0.854	-0.00319	0.0101	0.0938	-0.386	-0.0145	-0.453	-0.0707	0.269	0.113	-1.05	-0.0305	0.0413	0.294	0.384	-0.187	-0.672	-0.185	0.334	-0.0502	-0.859	0.0191	-0.214	0.125	0.102	-0.434	-0.00149
GLCM_HUMAN	GBA	-0.161	-0.216	-0.225	0.166	-0.0586	-0.547	0.201	0.191	-0.191	0.0231	0.0116	-0.0898	-0.684	0.12	-0.0463	0.111	0.0655	-0.083	-0.0675	0.0369	0.0341	-0.341	0.247	-0.336	-0.0242	-0.0889	0.164	0.136	0.0466	-0.0445
GLDN_HUMAN	GLDN	0.0142	0.0501	-0.447	0.437	0.254	-0.459	0.468	0.376	-0.355	0.0278	-0.677	0.033	-0.295	0.269	-0.0454	0.274	0.57	-0.0537	-0.394	-0.55	-0.258	-0.114	0.0743	0.125	-0.305	-0.137	0.0821	0.116	0.475	-0.479
GLO2_HUMAN	HAGH	-0.0268	-0.0398	0.261	-0.0721	0.283	0.214	-0.177	0.432	-0.131	1.17	-0.133	0.551	0.0101	-0.405	0.246	0.701	0.0982	0.174	0.004	-0.269	-0.107	0.229	-0.0828	0.997	-0.0566	0.0852	0.0284	0.0392	0.0292	-0.0896
GLOD4_HUMAN	GLOD4	-0.0291	0.00226	-0.0318	-0.131	0.0216	0.104	-0.339	0.203	-0.0512	0.328	-0.0846	0.0302	-0.288	-0.111	0.0572	0.196	0.00525	0.0108	-0.118	0.0569	-0.266	0.0809	-0.17	0.228	-0.275	-0.0175	-0.182	-0.0676	-0.0233	-0.0431
GLRX1_HUMAN	GLRX	-0.157	-0.0202	-0.263	0.222	-0.0111	-0.143	-0.127	0.229	0.0565	0.672	0.309	0.0213	-0.146	0.0921	0.135	-0.202	0.0254	0.049	0.0685	0.316	-0.269	-0.188	-0.0637	0.127	0.114	-0.199	-0.0517	0.0741	0.121	-0.109
GLT10_HUMAN	GALNT10	0.0346	-0.0361	0.0331	-0.0305	-0.112	-0.0164	0.00146	-0.0864	0.033	0.116	0.0385	0.149	0.0371	-0.0691	0.0705	-0.0375	0.171	0.0822	-0.0449	-0.0103	-0.0622	0.168	0.00232	-0.0759	0.0317	0.0637	0.0288	0.0564	-0.125	0.163
GLT11_HUMAN	GALNT11	0.178	0.17	0.39	-0.112	0.00653	-0.122	-0.0386	-0.069	0.225	-0.128	-0.14	0.274	0.139	-0.354	0.0527	0.0737	0.111	0.145	-0.0468	-0.0241	-0.141	0.0198	0.106	-0.394	0.169	0.0534	-0.0577	0.0979	-0.036	0.0216
GLT12_HUMAN	GALNT12	-0.0277	0.24	0.252	-0.197	0.0557	0.223	0.317	0.00758	0.0163	-0.549	-0.135	0.435	0.0791	-0.0899	0.107	-0.0994	0.152	0.0841	-0.335	-0.0802	-0.109	0.0698	-0.12	-0.14	0.0807	0.0735	0.197	0.0298	-0.229	-0.412
GLT13_HUMAN	GALNT13	0.00486	-0.188	-0.255	0.151	-0.118	-0.211	0.0506	0.146	-0.3	0.345	0.0819	-0.478	0.00599	0.257	-0.00862	-0.245	-0.0597	-0.252	0.313	-0.0136	-0.298	-0.268	0.158	-0.215	0.102	0.00769	-0.0608	0.0213	0.264	-0.144
GLT15_HUMAN	GALNT15	-0.558	-0.0161	-0.126	-0.214	-0.273	-0.653	0.228	0.152	0.0221	0.0564	0.101	-0.287	-0.0778	-0.00431	0.0375	-0.451	0.135	0.0577	-0.0275	-0.238	0.18	-0.177	-0.0455	-0.189	-0.0126	-0.118	-0.0357	0.224	0.136	0.0484
GLT16_HUMAN	GALNT16	-0.0324	0.0334	0.224	0.0241	0.0133	0.136	-0.0594	-0.1	-0.0126	-0.313	-0.204	-0.0608	0.189	-0.147	0.113	-0.124	0.000846	0.134	0.128	0.0849	-0.305	-0.00774	0.0885	-0.101	-0.0325	0.087	-0.149	0.073	-0.0905	0.0672
GLT18_HUMAN	GALNT18	0.0468	-0.129	-0.0607	0.114	0.0691	0.0556	-0.191	0.0393	0.308	-0.13	-0.0955	-0.243	-0.104	0.00602	0.0938	-0.0812	0.377	0.105	0.0415	-0.305	-0.324	-0.199	0.129	-0.161	-0.137	0.0988	0.0471	0.0268	0.166	-0.173
GLTL3_HUMAN		0.0945	-0.0881	0.139	0.0882	0.069	-0.0397	0.114	-0.16	0.0379	-0.216	0.0962	-0.197	-0.0112	0.139	-0.022	-0.0436	0.0933	-0.187	0.332	-0.117	-0.0303	-0.309	0.0151	0.00139	-0.113	0.144	-0.208	0.139	0.0454	-0.135
GLU2B_HUMAN	PRKCSH	0.00907	0.261	-0.03	0.141	0.062	0.0363	0.0508	-0.0745	0.0737	-0.215	-0.0439	-0.0513	0.132	0.137	-0.0482	-0.0848	-0.0906	0.213	0.194	-0.11	-0.244	-0.013	0.0474	-0.00175	-0.213	0.189	-0.0153	-0.0335	0.173	0.117
GMFB_HUMAN	GMFB	0.0795	0.0695	-0.106	0.0479	-0.0254	0.137	-0.189	0.0959	-0.1	0.0234	-0.043	-0.14	0.0863	-0.214	-0.0575	0.0605	0.0133	0.157	0.0647	0.126	-0.224	0.0228	-0.183	0.143	-0.174	0.00521	-0.0284	0.0256	0.00803	0.121
GNAI1_HUMAN	GNAI1	0.0473	-0.0124	-0.458	0.214	0.0309	-0.13	0.138	0.0256	0.13	-0.435	-0.153	-0.382	0.377	-0.129	0.0369	-0.0321	0.0122	0.00115	0.0618	-0.135	-0.083	-0.318	0.0202	-0.147	-0.111	0.139	0.166	-0.148	0.196	0.158
GNAS3_HUMAN	GNAS	0.47	-0.00377	0.563	-0.11	0.0427	-0.0811	-0.185	-0.307	0.33	-0.18	0.19	-0.324	0.0744	-0.0743	0.193	-0.238	0.271	0.138	-0.253	0.314	-0.0112	0.316	-0.0537	0.195	-0.363	-0.269	-0.0371	0.184	-0.385	0.189
GNPTG_HUMAN	GNPTG	0.0391	-0.0298	0.482	-0.329	0.0114	0.121	0.00756	-0.342	0.26	-0.355	0.01	0.4	-0.219	-0.137	0.111	-0.0741	-0.0932	0.295	0.0279	-0.0934	0.0818	0.246	-0.0556	0.0829	0.297	-0.139	-0.0351	0.00222	-0.383	0.136
GNS_HUMAN	GNS	0.0984	0.0811	0.597	-0.486	-0.0537	0.0468	0.36	-0.356	0.0745	-0.0232	-0.161	0.41	0.11	-0.258	0.184	-0.0529	0.325	0.418	-0.175	-0.358	-0.254	0.456	-0.0237	-0.0492	-0.216	-0.0709	0.145	0.061	-0.307	0.13
GOLI_HUMAN	RNF130	-0.0779	-0.225	-0.494	-0.195	0.0272	-0.0432	0.303	0.133	-0.303	0.617	-0.325	0.205	-0.0369	-0.411	0.325	0.225	0.274	0.138	-0.28	-0.288	-0.0994	0.0336	0.126	0.441	-0.47	0.0467	0.0266	-0.0616	0.119	-0.293
GOLI4_HUMAN	GOLIM4	0.0583	0.0732	0.00388	0.0364	0.0769	0.0145	-0.112	-0.166	0.0253	-0.25	-0.0465	-0.0391	0.0814	0.0165	-0.166	-0.166	-0.0375	-0.0556	0.254	0.00593	0.0791	-0.0453	-0.0154	0.262	-0.183	-0.0071	-0.0209	-0.0404	0.0496	-0.03
GOLM1_HUMAN	GOLM1	-0.206	-0.0105	-0.0913	0.175	0.0326	0.0294	0.195	-0.0532	-0.156	0.15	0.112	-0.195	0.204	0.318	-0.0475	-0.0579	-0.0351	-0.197	0.164	0.0373	-0.0374	-0.218	0.11	-0.0124	0.0291	0.228	-0.0161	0.0358	0.325	-0.0449
GP158_HUMAN	GPR158	-0.00269	0.118	0.497	-0.23	-0.122	0.481	-0.213	-0.195	0.0059	-0.195	-0.175	-0.278	0.132	-0.25	-0.016	0.00606	0.347	0.45	0.19	-0.0058	-0.466	-0.0265	-0.0474	0.0111	-0.228	0.11	-0.00505	0.0728	0.128	0.207
GP180_HUMAN	GPR180	-0.00568	-0.112	0.0397	-0.0209	0.163	0.0658	0.346	-0.273	-0.00401	-0.399	-0.195	-0.0699	0.939	-0.191	-0.00538	0.0458	0.0657	0.0939	-0.0368	-0.00306	-0.359	-0.0949	-0.0509	-0.359	0.0222	0.154	0.0747	0.188	0.109	0.194
GPC1_HUMAN	GPC1	0.02	0.106	-0.196	0.0664	-0.131	-0.158	-0.0803	-0.107	-0.00247	0.0764	0.0756	0.0339	0.0745	0.0528	0.127	-0.074	0.218	0.104	-0.101	-0.227	-0.0386	0.0174	0.1	-0.146	-0.202	0.184	0.147	-0.108	0.148	-0.19
GPC4_HUMAN	GPC4	-0.152	0.161	0.0724	-0.397	-0.303	-0.214	-0.153	-0.103	0.0271	0.312	-0.0775	-0.165	0.166	-0.262	0.0671	0.124	0.154	0.0671	0.245	-0.436	-0.143	0.13	0.105	0.241	-0.392	-0.126	0.195	0.0104	-0.135	-0.00526
GPC5_HUMAN	GPC5	0.0653	0.363	0.127	0.0328	-0.226	-0.117	-0.00228	-0.328	-0.0502	-0.302	-0.023	0.419	0.24	-0.34	0.0674	-0.108	0.111	0.253	0.0496	-0.501	-0.473	0.0368	0.0743	-0.0904	-0.36	0.184	0.0943	0.141	-0.00499	-0.138
GPC6_HUMAN	GPC6	-0.0794	0.312	0.132	-0.0473	-0.111	-0.0565	0.0644	-0.11	-0.133	-0.139	-0.212	0.15	-0.0416	-0.21	-0.0741	0.00554	0.00718	0.361	0.207	-0.0733	0.201	-0.0121	0.169	0.0213	-0.151	-0.00265	0.236	-0.183	0.0608	-0.042
GPNMB_HUMAN	GPNMB	-0.295	-0.0635	-0.485	0.406	0.0803	-0.603	0.159	0.174	-0.288	0.024	0.18	-0.351	-0.407	0.502	0.353	0.424	-0.0956	-0.344	-0.0584	-0.0138	0.242	-0.47	-0.186	-0.0332	0.314	0.276	-0.0716	0.374	0.0457	-0.0989
GPR37_HUMAN	GPR37	-0.0544	0.058	0.0501	-0.076	-0.235	0.107	-0.214	0.066	0.00773	0.129	-0.132	0.0473	0.137	-0.0201	0.0129	-0.0948	-0.179	0.154	-0.104	0.142	-0.114	0.0847	0.0079	-0.0931	-0.211	0.0459	-0.0921	0.0181	-0.0981	0.0807
GPX3_HUMAN	GPX3	-0.0965	0.0051	0.325	-0.111	0.175	-0.162	0.125	-0.0624	0.32	-0.0464	-0.18	0.281	-0.248	-0.0418	0.332	-0.179	0.156	0.168	0.0102	0.0662	0.202	0.329	-0.0331	-0.0854	0.208	-0.229	-0.0239	0.106	-0.366	-0.00638
GRB2_HUMAN	GRB2	-0.0937	-0.0197	-0.255	0.104	-0.0346	-0.116	-0.293	0.749	-0.225	0.869	0.174	-0.508	0.191	0.26	-0.156	0.244	-0.159	-0.0747	0.261	0.135	-0.0884	-0.0795	-0.0459	0.264	0.349	0.0553	-0.18	0.0641	0.372	-0.0857
GRIA2_HUMAN	GRIA2	0.208	-0.0593	-0.441	0.349	0.045	0.0869	-0.0218	0.149	0.0234	0.0362	0.244	-0.0478	0.0162	0.227	0.0143	0.0208	0.0154	-0.332	0.293	-0.118	0.404	-0.13	-0.0204	-0.152	-0.223	0.429	0.118	0.0371	0.341	-0.126
GRIA3_HUMAN	GRIA3	0.25	-0.0663	-0.337	0.0944	0.00203	0.267	0.0459	-0.141	0.143	0.16	-0.097	0.207	0.0418	-0.139	0.24	0.181	0.253	-0.0677	-0.0748	-0.299	-0.221	-0.124	-0.0204	-0.0227	-0.392	0.451	0.235	-0.119	0.222	-0.178
GRIA4_HUMAN	GRIA4	-0.0191	-0.197	-0.42	0.472	0.157	-0.289	-0.0311	0.244	-0.127	0.417	0.0392	-0.463	-0.127	0.344	0.252	-0.137	0.212	-0.398	0.188	-0.308	-0.289	-0.577	0.0432	-0.0442	-0.398	0.408	0.205	0.129	0.497	-0.237
GRP_HUMAN	GRP	0.14	0.0859	0.259	-0.269	-0.0262	0.4	-0.249	-0.059	-0.115	-0.296	0.179	0.0067	0.116	-0.195	-0.415	0.328	0.247	0.0132	-0.145	0.344	0.216	-0.0822	-0.0333	-0.188	-0.721	0.371	0.0665	-0.0702	-0.0447	0.274
GRP78_HUMAN		0.0739	0.117	0.153	-0.116	-0.00185	0.051	-0.0494	-0.0208	0.00383	-0.119	-0.0273	-0.019	0.0637	0.00132	-0.125	-0.0848	-0.00813	0.186	0.0294	-0.0275	-0.213	-0.000376	0.073	-0.0105	0.0646	0.125	-0.00104	0.0492	-0.0311	0.0111
GSH1_HUMAN	GCLC	0.191	-0.285	0.26	0.189	0.632	0.11	-0.00156	1.41	-0.0733	2.56	0.0222	0.958	-0.0417	-0.605	-0.0505	1.85	0.0748	-0.0843	-0.24	-0.144	0.0917	0.298	0.0934	2.47	-0.23	-0.304	0.554	0.0667	-0.245	-0.0139
GSHB_HUMAN	GSS	-0.0514	0.0156	-0.084	-0.127	0.0679	-0.0258	-0.181	0.115	-0.0519	0.182	0.0472	-0.159	0.0771	-0.0811	-0.161	0.172	0.0248	-0.15	0.0616	-0.118	-0.139	0.0606	-0.106	0.0974	-0.256	0.0406	-0.0478	0.0185	0.0316	0.0634
GSHR_HUMAN	GSR	-0.0203	0.0242	-0.0389	-0.0521	0.0163	0.188	-0.174	0.134	-0.0747	0.299	0.135	0.0174	0.0296	0.0563	0.0342	-0.367	-0.069	-0.0149	-0.000719	0.169	-0.0018	-0.146	-0.0672	0.216	-0.0945	-0.1	-0.0819	0.0425	0.199	0.0576
GSLG1_HUMAN	GLG1	0.0823	0.0114	0.0372	-0.00332	0.18	0.00728	0.101	-0.12	0.016	-0.11	-0.164	-0.0272	0.141	-0.21	0.0629	-0.0374	0.17	0.0639	0.0169	0.0316	-0.285	-0.122	-0.0266	-0.248	-0.129	0.032	-0.000882	0.019	0.0489	0.0283
GSTM2_HUMAN	GSTM2	-0.356	-0.00345	-0.124	-0.0566	0.0165	-0.143	0.077	0.142	0.202	0.602	-0.072	-0.146	-0.11	0.0522	0.39	-0.014	0.0785	-0.188	0.154	-0.532	0.0229	0.251	-0.129	0.456	-0.183	0.336	0.263	0.00703	0.0276	0.0782
GSTO1_HUMAN	GSTO1	0.0639	-0.645	-0.165	0.267	0.233	-0.169	0.0804	-0.0232	-0.0294	1.57	-0.0848	-0.0625	0.054	-0.728	0.552	0.655	-0.0533	-0.204	0.0653	0.402	0.339	-0.149	0.0903	1.16	0.194	-0.147	-0.00621	-0.042	0.195	-0.176
GSTP1_HUMAN	GSTP1	-0.0898	-0.0203	-0.0742	-0.232	0.0696	-0.0581	0.123	0.0314	0.00734	0.253	0.0965	-0.071	0.0513	0.237	0.346	-0.0132	-0.194	-0.0401	-0.0479	-0.232	0.17	-0.289	0.0224	0.0961	0.0333	-0.0981	0.173	0.0675	-0.0866	0.00377
GUAD_HUMAN	GDA	0.0142	0.172	-0.551	0.463	-0.129	-0.0803	-0.233	0.138	-0.0441	-0.0727	0.052	-0.289	0.438	-0.0988	-0.0323	0.261	0.194	-0.116	0.107	-0.143	-0.277	0.0327	-0.157	-0.15	-0.666	0.404	0.163	0.029	0.4	-0.106
GUC2A_HUMAN	GUCA2A	0.187	-0.405	0.41	-0.552	0.00234	-0.405	0.327	-0.634	0.109	-1.08	-0.133	0.255	-0.0465	-0.582	0.0783	-0.211	0.721	-0.203	-0.444	0.186	0.589	0.219	0.132	-0.434	0.402	-0.913	-0.184	-0.256	-0.573	0.0146
GXLT1_HUMAN	GXYLT1	-0.0697	-0.0989	-0.21	0.0187	0.0925	-0.179	0.294	0.045	0.0519	-0.00967	-0.00428	-0.167	-0.176	0.247	0.0256	-0.101	0.00637	-0.169	0.112	0.0276	-0.218	-0.0528	-0.0289	0.104	0.222	0.0949	-0.0027	-0.0334	0.196	0.0677
H12_HUMAN	HIST1H1C	-0.272	-0.356	-0.22	0.299	0.803	-0.145	-0.0131	1.31	-0.323	0.619	0.533	0.876	-0.93	0.387	-0.439	-0.319	-0.501	0.156	-0.0111	0.419	0.826	0.0333	0.152	1.31	0.586	-0.109	-0.183	-0.0582	-0.338	-0.109
H2B1B_HUMAN	HIST1H2BB	0.289	0.21	0.172	-0.683	-0.0672	-0.114	-0.476	0.224	0.275	0.425	-0.0401	0.355	-0.201	-0.838	-0.471	0.124	0.224	-0.118	-0.0681	0.57	-0.188	0.109	-0.127	0.606	0.368	-0.0276	-0.658	-0.0459	0.313	-0.0823
H31T_HUMAN	HIST3H3	0.218	0.52	-0.322	-0.22	0.616	-0.0955	-0.141	0.596	-0.025	-0.0163	0.256	0.388	-0.491	-0.215	0.243	0.104	-0.168	0.13	0.171	-0.58	-0.173	0.48	0.0979	0.722	0.837	0.00313	0.204	0.169	-0.0383	-0.361
H4_HUMAN	HIST1H4A	-0.0231	0.246	-0.0543	-0.0936	0.24	-0.0775	-0.2	0.636	0.096	0.0618	-0.179	-0.425	-0.445	-0.162	0.0629	0.0984	0.0482	0.00182	0.116	0.993	0.0805	0.452	-0.136	0.349	0.669	-0.219	-0.552	0.00817	0.368	-0.0721
H6ST1_HUMAN	HS6ST1	-0.0736	-0.0927	-0.000712	0.0953	-0.0819	-0.109	0.0892	0.454	-0.163	0.12	-0.134	-0.0249	0.15	0.124	-0.0818	-0.017	-0.0254	0.171	0.19	-0.0686	-0.12	0.0278	0.109	0.196	0.0522	0.0733	-0.0178	0.0997	-0.0468	-0.195
H6ST3_HUMAN	HS6ST3	0.0059	0.139	-0.0815	0.0382	-0.000261	0.249	-0.273	-0.134	0.0481	-0.309	-0.0498	-0.053	0.281	-0.000588	-0.0413	0.266	-0.0918	-0.137	-0.00994	-0.0895	-0.371	-0.0078	-0.0462	-0.108	-0.313	0.216	0.032	-0.0882	0.0591	0.0538
HABP2_HUMAN	HABP2	-0.286	-0.57	-0.0805	0.189	0.669	-0.128	0.578	0.0392	-0.216	0.117	0.593	0.332	-0.734	0.431	-0.208	-0.0792	-0.191	-0.535	0.0577	0.363	0.787	0.000198	0.295	-0.0807	0.787	-0.319	0.414	-0.0268	-0.312	-0.3
HAVR2_HUMAN	HAVCR2	-0.128	0.277	-0.133	0.295	-0.0194	-0.116	-0.000411	-0.106	0.109	-0.0887	0.264	-0.427	-0.132	0.207	0.0126	0.069	0.0592	-0.0946	-0.108	0.0547	-0.0594	0.072	-0.0331	-0.141	-0.0127	-0.15	0.00234	0.182	0.122	0.11
HBA_HUMAN	HBA1;	0.992	-0.53	-0.128	2.75	3.39	-0.15	-0.459	4.82	-0.439	5.99	-0.646	3.78	-0.647	-0.483	-0.743	6.07	-0.6	1.13	-0.775	0.346	-0.177	0.148	-0.741	6.58	-0.0527	-0.325	2.92	-0.435	-0.759	-0.426
HBB_HUMAN	HBB	0.642	-0.687	-0.205	2.58	3.21	-0.0393	-0.41	4.58	-0.603	5.8	-1.06	3.47	-1.07	-0.0454	-1.11	5.81	-1.05	1.19	-1.24	-0.037	-0.3	0.779	-0.85	6.31	-0.328	-0.814	2.72	-0.316	-0.949	-0.705
HBD_HUMAN	HBD	0.282	-0.312	-0.0127	1.39	2.07	0.274	-0.161	3.41	-0.167	4.23	-0.89	2.07	-0.992	-0.503	-0.88	4.29	-0.758	0.695	-1.17	0.371	0.0161	0.0888	-0.731	4.74	0.0502	-0.41	1.41	-0.449	-0.731	-0.522
HBEGF_HUMAN	HBEGF	0.157	-0.0481	-0.0702	0.0787	-0.123	0.364	0.14	0.181	-0.0305	-0.00579	0.0538	-0.0568	0.25	-0.0183	0.0183	-0.224	-0.318	0.0666	0.0481	-0.0163	0.114	0.213	0.111	-0.0776	-0.265	0.134	0.0552	-0.12	0.124	0.232
HBG1_HUMAN	HBG1	0.53	0.327	0.702	0.968	0.985	0.968	0.418	4.05	0.693	3.24	0.0228	1.09	0.0988	-0.124	-0.287	4.59	0.103	0.222	0.355	0.0979	0.43	0.321	-0.261	3.67	0.078	0.0374	1.05	-0.252	-0.261	-0.03
HDHD2_HUMAN	HDHD2	0.424	-0.0693	-0.247	-0.0604	-0.123	-0.446	-0.133	0.22	-0.218	0.318	-0.197	-0.148	-0.022	-0.243	0.45	-0.0744	0.0861	0.0367	-0.00984	0.184	-0.519	0.0554	0.182	0.304	-0.0668	-0.0348	-0.0333	0.0113	0.12	0.169
HEBP1_HUMAN	HEBP1	-0.0901	-0.57	0.273	-0.0313	0.459	-0.0549	-0.0403	0.337	-0.0881	1.44	-0.0594	0.126	0.0707	-0.865	0.583	0.755	-0.105	0.111	-0.0606	-0.0942	0.243	0.118	-0.0258	1.19	0.067	-0.314	0.0908	-0.163	0.00332	-0.0566
HECAM_HUMAN	HEPACAM	-0.212	0.192	0.464	-0.128	-0.105	0.0511	-0.463	-0.196	0.217	-0.274	-0.241	0.034	0.308	-0.0215	0.122	-0.227	0.139	0.0172	-0.00366	-0.0657	-0.038	0.373	-0.176	-0.0557	0.0643	-0.008	-0.212	-0.289	-0.149	0.235
HEG1_HUMAN	HEG1	0.224	0.2	0.0618	0.233	0.047	-0.000852	-0.0554	-0.155	0.192	-0.152	0.0203	-0.0948	0.184	0.136	-0.131	0.00244	-0.325	0.0867	-0.0478	0.221	0.0817	0.00715	-0.1	0.00941	-0.0219	0.0622	-0.35	-0.0731	0.205	0.0172
HEM2_HUMAN	ALAD	0.244	-0.198	0.613	0.522	0.859	0.0204	-0.152	1.98	-0.0737	3.16	-0.0855	1.9	-0.522	-0.13	-0.138	2.49	-0.181	-0.102	-0.182	-0.199	0.14	0.335	-0.052	3.14	0.0921	-0.187	0.62	-0.31	-0.0243	-0.0335
HEMO_HUMAN	HPX	0.165	-0.19	0.479	-0.184	0.495	0.216	0.575	-0.706	0.239	-0.387	0.425	0.895	-0.513	-0.13	-0.151	-0.153	0.0852	-0.25	-0.00338	0.0851	0.691	0.661	0.278	-0.108	0.796	-0.532	-0.17	-0.0238	-0.505	0.171
HEP2_HUMAN	SERPIND1	0.0655	0.0513	0.264	-0.141	0.296	-0.044	0.504	-0.321	0.24	-0.461	0.453	0.643	-0.204	-0.196	-0.322	0.0253	-0.0309	-0.0696	0.0458	0.266	0.758	0.251	0.171	-0.0887	0.532	-0.161	0.266	-0.0761	-0.276	0.0569
HEPC_HUMAN	HAMP	0.429	-0.118	0.347	-0.38	0.165	-0.0526	0.206	-0.055	0.0957	-0.218	0.408	-0.686	0.309	-0.238	0.0314	-0.205	-0.102	0.273	-0.193	-0.368	0.513	-0.00216	0.403	0.174	0.0714	-0.181	0.00648	-0.32	-0.177	-0.245
HEPH_HUMAN	HEPH	-0.0865	0.0657	0.062	-0.114	-0.252	0.211	-0.0411	0.018	0.0122	0.0283	-0.0103	0.0516	0.0186	-0.0432	0.164	-0.0651	-0.174	0.0948	0.04	-0.0501	-6.59e-05	-0.0242	0.128	-0.0301	-0.137	0.0623	-0.0331	-0.0894	0.234	-0.0469
HEXA_HUMAN	HEXA	0.0749	0.0488	0.29	-0.272	-0.155	-0.215	0.0809	-0.226	0.0736	-0.258	-0.0105	0.0563	0.00226	-0.0293	0.232	-0.0956	0.303	-0.0855	-0.226	-0.378	-0.15	-0.0741	0.117	-0.125	-0.0987	0.0856	0.0884	0.0922	0.0832	-0.175
HEXB_HUMAN	HEXB	-0.0295	0.0244	0.224	-0.125	-0.0666	-0.261	-0.418	-0.0184	0.033	0.088	-0.0855	0.101	0.0853	-0.12	0.145	-0.0291	0.397	0.0793	-0.00596	-0.161	-0.245	-0.0383	0.128	-0.141	-0.118	0.0704	0.0264	0.0834	0.00612	0.175
HG2A_HUMAN	CD74	-0.282	-0.157	-0.314	0.0408	0.247	-0.921	-0.0518	0.131	0.212	0.195	-0.312	0.266	-0.388	0.223	0.233	-0.608	0.0147	0.149	-0.513	0.22	0.435	0.0789	-0.529	-0.376	-0.0257	-0.153	0.135	-0.362	-0.369	0.108
HGFA_HUMAN	HGFAC	0.352	-0.599	0.185	0.00472	0.174	-0.221	-0.00666	-0.0345	0.157	0.323	0.28	0.0711	-0.399	0.118	-0.298	-0.0185	-0.282	-0.553	-0.122	0.728	0.619	-0.17	0.0272	0.407	0.676	-0.746	-0.233	0.0241	-0.216	-0.118
HGFL_HUMAN	MST1	-0.688	-0.077	-0.00177	0.0352	-0.072	-0.0672	0.294	0.0504	0.184	0.472	0.0276	0.32	-0.141	-0.847	-0.635	0.492	0.259	-0.295	-0.129	0.117	0.692	-0.401	-0.0874	0.182	0.828	-0.64	0.174	-0.0753	-0.155	0.0386
HINT1_HUMAN	HINT1	0.111	-0.308	0.529	0.476	0.821	-0.424	-0.259	1.6	-0.295	2.53	-0.0349	0.62	-0.181	0.8	0.83	1.4	-0.45	-0.0397	0.117	-0.152	0.8	-0.0419	-0.0618	2.08	0.292	0.0361	0.603	-0.285	0.00808	-0.0519
HLAE_HUMAN	HLA-E	-0.138	0.428	0.272	-0.432	-0.224	0.249	-0.0892	-0.256	0.0325	-0.613	-0.194	0.265	0.3	-0.33	-0.0202	-0.408	-0.223	0.412	-0.419	-0.186	0.164	0.354	0.2	0.0456	-0.00808	0.121	0.0212	-0.0682	-0.181	-0.258
HLPDA_HUMAN	HILPDA	0.0815	-0.00889	-0.176	-0.000999	0.142	0.19	-0.283	0.119	0.0902	0.302	0.0511	-0.0753	0.355	0.235	-0.212	0.109	-0.14	-0.152	0.107	0.0813	0.0139	0.121	-0.123	-0.128	0.0814	-0.15	-0.126	-0.454	-0.0822	-0.177
HMCN1_HUMAN	HMCN1	-0.00607	0.0774	0.0892	-0.129	0.0674	-0.0362	0.259	0.0938	0.107	-0.13	-0.0139	0.0499	-0.0872	0.252	-0.11	0.0935	-0.0993	0.11	-0.164	0.132	0.209	-0.0498	-0.0841	-0.206	0.0407	-0.0719	0.0467	-0.133	-0.239	-0.0343
HMGB1_HUMAN	HMGB1	-0.147	-0.374	-0.251	0.0666	0.87	-0.0142	-0.178	0.242	-0.0447	0.115	0.321	0.238	-0.544	0.496	-0.0195	-0.0884	-0.71	-0.0941	-0.626	-0.0128	0.358	-0.136	0.0504	0.885	0.503	0.047	-0.444	0.115	0.0616	-0.224
HMGN2_HUMAN	HMGN2	-0.377	-0.279	-0.0447	0.095	1.01	-0.12	-0.282	0.207	-0.489	0.702	0.593	0.517	-0.468	0.624	0.329	-0.755	-0.344	-0.152	-0.237	-0.236	0.17	-0.101	-0.0249	0.824	0.752	0.327	-0.302	0.123	-0.124	-0.388
HN1_HUMAN		0.0933	0.0708	0.0177	0.274	0.0972	0.05	-0.115	0.253	0.0383	-0.0299	0.148	-0.0339	-0.00766	0.0195	0.108	0.0681	0.00544	0.161	0.0316	0.187	0.289	0.295	0.16	0.401	0.187	0.274	0.443	0.263	0.0116	0.192
HPLN1_HUMAN	HAPLN1	0.225	-0.151	-0.592	0.164	0.165	-0.06	0.461	0.71	-0.0515	-0.247	0.3	0.0872	0.484	-0.314	-0.0481	0.0449	0.13	-0.136	-0.703	0.572	-0.494	0.525	-0.123	-0.135	-0.361	0.325	-0.275	-0.136	0.397	-0.295
HPLN2_HUMAN	HAPLN2	0.0634	-0.375	-0.00311	0.108	0.111	-0.227	0.327	0.121	-0.384	-0.403	0.304	0.283	-0.026	-0.203	-0.258	0.00193	-0.028	-0.316	0.148	0.0286	0.464	0.228	-0.143	-0.0384	0.368	-0.424	-0.118	0.109	0.0558	-0.1
HPLN4_HUMAN	HAPLN4	-0.524	-0.0397	0.461	-0.289	0.123	0.27	-0.0926	-0.0199	0.0703	-0.533	-0.0294	0.179	0.365	-0.633	0.0112	-0.368	0.0788	0.229	-0.0861	0.0239	0.205	0.305	-0.264	-0.159	-0.129	-0.138	-0.182	-0.44	-0.14	-0.558
HPRT_HUMAN	HPRT1	0.112	-0.0196	-0.34	0.463	0.188	-0.0976	0.0723	0.632	-0.164	1.12	0.356	-0.251	-0.00661	-0.0724	-0.0127	0.735	0.0525	-0.265	0.265	0.0956	0.0206	-0.103	-0.241	0.904	-0.0598	0.178	0.134	-0.0011	0.395	-0.124
HPT_HUMAN	HP	-0.539	0.0287	2.25	-0.537	0.21	1.52	0.109	-0.669	-0.0162	1.11	0.266	1.74	-0.219	-0.403	-0.608	0.0291	-0.346	-0.0677	0.987	-0.706	1.65	0.138	-0.298	0.285	2.5	-0.406	-0.0129	-0.153	0.632	-0.324
HRG_HUMAN	HRG	-0.0687	-0.53	0.466	-0.106	0.245	-0.363	0.737	-0.22	0.384	-0.875	0.196	0.405	-0.644	0.263	0.17	-0.27	-0.383	-0.49	-0.0779	0.903	0.776	-0.177	0.111	0.0325	1	-0.387	-0.0541	0.234	-0.15	-0.378
HS3S1_HUMAN	HS3ST1	0.103	0.117	0.498	-0.194	-0.0723	0.495	-0.146	-0.189	0.103	-0.249	-0.398	0.215	-0.0283	-0.303	0.0229	0.0647	0.403	0.251	-0.0354	-0.346	-0.234	0.338	-0.104	0.222	0.031	-0.167	-0.0445	0.174	0.0112	0.183
HS71A_HUMAN	HSPA1A	-0.0888	-0.231	-0.0429	0.105	0.0452	-0.131	-0.124	0.421	-0.353	0.805	-0.0769	-0.00488	-0.0137	0.723	0.386	0.00178	-0.212	-0.23	0.0496	-0.0646	0.29	0.0249	-0.119	0.752	0.0439	-0.117	0.22	-0.142	0.0204	-0.217
HS90A_HUMAN	HSP90AA1	-0.00973	-0.171	-0.325	0.206	0.252	-0.166	-0.159	0.445	-0.0977	1.02	0.271	0.0192	-0.203	0.69	0.143	0.223	-0.312	-0.143	0.175	-0.0707	0.0852	-0.24	-0.072	0.948	0.208	-0.0981	-0.0656	0.0353	0.119	-0.1
HS90B_HUMAN	HSP90AB1	-0.13	-0.022	-0.137	0.0656	0.179	0.0971	0.435	0.248	-0.132	0.923	-0.03	0.096	-0.382	0.383	1	0.109	-0.0376	-0.0187	-0.143	-0.176	0.0881	-0.0569	-0.2	0.741	1.56	-0.0693	-0.0613	-0.0183	0.00843	-0.0269
HSP13_HUMAN	HSPA13	0.00376	-0.00369	0.271	-0.303	-0.103	-0.115	0.179	-0.211	0.0218	-0.0138	0.0795	0.00899	-0.0227	-0.0825	0.0303	0.0478	0.119	0.0169	0.00405	-0.449	0.0691	-0.0359	-0.0303	-0.0438	0.16	-0.0435	0.0323	-0.0126	-0.201	-0.3
HSP72_HUMAN	HSPA2	0.106	-0.0264	-0.000527	-0.0854	0.116	-0.00338	0.091	0.102	0.412	-0.376	-0.0502	0.0284	0.206	-0.0331	0.0384	-0.179	-0.132	-0.0811	-0.225	0.184	0.000238	-0.064	0.0867	-0.264	-0.0684	0.0388	-0.125	0.065	0.162	0.183
HSP76_HUMAN	HSPA6	-0.17	-0.0597	-0.278	0.181	0.125	-0.326	-0.0162	0.422	-0.131	0.616	0.239	-0.439	0.125	0.505	-0.0861	-0.0986	-0.0537	-0.408	0.15	0.102	0.599	-0.255	-0.27	0.2	0.1	0.0886	-0.104	-0.00182	0.149	-0.142
HSP7C_HUMAN	HSPA8	-0.136	-0.26	-0.102	0.125	0.239	-0.22	-0.128	0.704	-0.163	1.19	-0.0917	0.185	0.0954	0.504	0.332	0.599	-0.0777	-0.165	-0.0405	-0.116	0.152	-0.00954	-0.0797	1.28	0.126	-0.177	0.0969	-0.0349	-0.0965	-0.07
HSPB1_HUMAN	HSPB1	-0.421	-0.171	-0.081	0.0415	0.288	0.0346	0.0312	0.325	0.119	0.501	-0.251	-0.172	-0.138	0.53	0.312	-0.0702	-0.362	-0.229	-0.0779	0.359	0.387	0.04	-0.101	0.259	0.201	-0.37	0.387	-0.16	-0.138	-0.125
HTRA1_HUMAN	HTRA1	0.0201	0.0857	0.0971	-0.139	0.00723	-0.052	0.0553	-0.0376	0.138	-0.147	-0.0502	0.0639	-0.0383	0.18	0.055	-0.0697	-0.0363	0.0143	-0.0584	-0.0126	0.0453	0.122	-0.0464	-0.15	-0.0258	-0.0178	0.00296	0.12	-0.175	0.155
HTRA2_HUMAN	HTRA2	0.0393	-0.31	-0.104	0.119	0.228	0.0215	0.0829	-0.474	0.0592	0.34	0.0604	0.28	-0.254	-0.227	-0.0322	0.539	-0.298	-0.217	-0.124	0.0818	-0.131	-0.0191	-0.0422	0.157	-0.33	0.418	0.0198	-0.106	0.0186	-0.0639
HV307_HUMAN	IGHV3-7	-0.1	-0.00771	0.999	-0.141	-0.0646	1.09	0.875	-0.429	0.251	0.151	-0.278	0.442	0.97	-0.446	0.0377	0.313	0.506	0.0744	-0.109	-0.486	2.44	0.239	-0.0153	-0.136	0.239	-0.101	-0.0784	-0.161	0.15	-0.303
HXK1_HUMAN	HK1	0.132	-0.0734	-0.134	0.087	-0.0923	0.0645	-0.126	0.0436	0.061	0.044	0.143	-0.188	-0.268	-0.248	0.0971	0.054	0.0764	0.102	0.224	0.102	-0.197	-0.116	-0.0276	-0.0453	0.0125	-0.0159	-0.153	0.0678	0.261	-0.201
HYAL1_HUMAN	HYAL1	0.404	-0.221	-0.171	-0.146	0.0491	0.189	0.124	-0.0297	0.0162	0.132	-0.071	0.573	-0.21	-0.422	-0.0316	0.335	0.221	0.112	-0.185	0.0619	0.381	0.188	-0.0996	0.258	0.347	-0.0535	-0.0844	-0.0282	-0.613	0.429
HYOU1_HUMAN	HYOU1	-0.178	-0.245	-0.343	0.312	-0.0394	-0.313	0.0944	0.134	-0.235	0.15	0.214	-0.528	-0.0941	0.309	-0.0791	-0.118	-0.00885	-0.256	0.226	0.0691	0.000868	-0.345	0.0338	-0.0504	0.104	0.119	-0.14	0.117	0.387	-0.214
I18BP_HUMAN	IL18BP	0.16	-0.15	0.09	0.312	-0.017	-0.111	0.152	0.0653	0.1	-0.333	0.136	-0.0682	-0.139	0.395	-0.175	-0.157	-0.202	-0.322	0.00934	0.558	0.237	-0.263	-0.00315	-0.137	0.127	-0.11	-0.146	0.0212	0.0159	0.401
IAH1_HUMAN	IAH1	-0.192	-0.107	-0.434	0.159	0.0739	-0.374	0.00298	0.356	-0.0737	0.634	-0.145	-0.121	0.141	-0.132	0.123	0.492	0.0962	-0.277	0.12	0.218	0.176	-0.145	-0.00612	0.267	0.162	-0.258	-0.176	-0.265	-0.0972	-0.296
IBP1_HUMAN	IGFBP1	0.152	0.0117	-0.0397	-0.117	-0.0664	-0.0223	0.0106	-0.153	0.406	0.0609	0.158	0.38	-0.17	-0.163	-0.0637	-0.324	0.395	0.167	0.0241	-0.166	0.289	0.218	-0.258	0.0337	0.449	0.00248	-0.0855	0.0255	-0.233	-0.17
IBP2_HUMAN	IGFBP2	0.051	-0.145	-0.0214	0.0172	-0.212	-0.43	0.293	-0.0298	0.0783	-0.315	-0.148	-0.393	-0.23	0.239	-0.0993	0.0719	-0.394	0.108	0.062	0.197	0.266	0.0963	-0.214	-0.442	0.138	0.0222	0.12	0.068	-0.0819	0.0129
IBP3_HUMAN	IGFBP3	-0.176	0.0664	0.231	-0.314	0.153	-0.143	0.305	-0.18	-0.183	-0.224	-0.533	0.174	-0.108	-0.195	0.162	-0.179	-0.102	-0.0829	0.0275	0.22	0.326	0.136	0.00876	-0.118	0.558	-0.0555	-0.035	-0.0575	0.0439	-0.208
IBP4_HUMAN	IGFBP4	-0.13	0.0327	-0.348	0.0951	0.176	-0.352	0.089	0.226	-0.134	-0.0778	-0.2	-0.3	-0.00412	0.0968	-0.131	-0.0298	0.0745	0.119	-0.0331	0.336	0.168	-0.168	0.00117	0.0768	0.402	0.0204	-0.135	-0.0807	-0.0546	0.112
IBP5_HUMAN	IGFBP5	-0.0382	0.136	0.249	-0.102	-0.0711	-0.0618	0.0497	-0.227	0.149	-0.242	-0.127	0.0202	0.212	-0.135	-0.175	0.0821	-0.0455	0.246	-0.206	0.0176	0.241	0.0589	-0.079	-0.24	0.073	0.0477	-0.0603	0.0758	-0.0438	0.198
IBP6_HUMAN	IGFBP6	-0.0562	-0.343	-0.0716	0.229	-0.291	-0.26	0.752	0.129	0.223	-0.0537	0.204	0.236	0.047	0.0318	0.335	-0.417	-0.0211	-0.256	-0.28	0.277	0.673	-0.224	-0.274	0.175	0.295	-0.0356	-0.332	-0.0284	-0.0344	0.511
IBP7_HUMAN	IGFBP7	0.266	0.177	0.794	-0.509	-0.149	0.119	-0.199	-0.417	0.281	0.0252	-0.541	0.659	-0.00611	-0.713	0.353	0.0557	0.216	0.169	-0.183	-0.274	-0.0598	0.573	-0.0191	-0.439	0.0455	-0.0616	-0.216	0.173	-0.289	0.513
IBPL1_HUMAN	IGFBPL1	0.308	-0.367	0.567	-0.293	-0.347	-0.0177	0.152	-0.102	-0.0881	-0.252	0.246	-0.259	0.0603	-0.337	-0.189	-0.00756	-0.0987	0.463	0.341	0.106	0.406	0.268	-0.067	0.0288	0.0115	-0.0971	-0.0659	0.0364	-0.229	-0.024
IC1_HUMAN	SERPING1	0.076	-0.0939	-0.0399	0.413	0.296	-0.398	0.803	0.0815	-0.035	-0.284	0.498	0.471	-0.318	0.229	0.0366	-0.248	-0.0718	-0.465	-0.000557	0.445	0.801	-0.00601	0.216	-0.104	1.06	-0.124	0.0734	-0.101	-0.29	0.147
ICAM1_HUMAN	ICAM1	-0.0257	0.171	0.268	-0.16	0.18	0.158	-0.145	-0.0241	-0.37	-0.106	0.215	0.0979	-0.281	0.239	-0.118	-0.202	-0.224	-0.449	-0.308	0.187	0.216	0.114	-0.0869	0.179	0.441	-0.337	-0.0355	-0.271	-0.368	-0.0057
ICAM2_HUMAN	ICAM2	0.0853	-0.0297	0.344	-0.157	0.177	0.253	0.143	-0.155	0.134	-0.162	-0.0384	0.512	-0.215	-0.0287	-0.0195	0.0712	0.298	-0.105	-0.109	0.0261	-0.338	0.297	0.0577	-0.012	0.464	-0.0524	-0.0437	0.168	-0.177	0.143
ICAM5_HUMAN	ICAM5	0.137	0.106	-0.435	0.139	0.0715	0.251	-0.324	-0.128	0.145	-0.27	0.0725	-0.106	0.372	-0.242	-0.208	0.238	0.0535	-0.0241	-0.11	-0.239	-0.427	-0.0359	0.000881	-0.151	-0.748	0.447	0.142	-0.0403	0.226	0.0411
ICOSL_HUMAN	ICOSLG	0.153	-0.0983	0.0613	-0.254	-0.0681	0.233	-0.0194	-0.127	0.33	-0.301	0.151	0.108	0.24	0.00349	0.168	0.0339	0.277	-0.289	-0.674	0.279	-0.167	-0.143	0.29	0.0955	-0.184	-0.201	0.00833	-0.229	0.0502	0.0652
IDD_HUMAN	DGCR2	0.0865	0.179	0.288	-0.046	-0.00981	0.138	-0.0365	-0.024	0.169	-0.248	0.225	-0.0955	0.149	-0.0611	-0.0515	-0.14	-0.0305	0.172	0.173	0.00598	-0.297	0.0552	0.0574	0.0914	0.0318	-0.0915	0.0118	0.0981	-0.0222	0.03
IDHC_HUMAN	IDH1	-0.0378	0.0482	-0.111	0.0597	0.0307	-0.0939	-0.165	0.244	-0.22	0.284	-0.0547	0.041	-0.0461	0.0485	0.265	0.11	-0.0422	-0.153	-0.251	-0.0297	0.0502	0.0781	0.0512	0.242	0.132	-0.259	-0.126	0.00507	-0.108	-0.0197
IDS_HUMAN	IDS	0.0294	0.0166	0.0538	-0.361	0.015	0.113	-0.00963	-0.291	0.033	-0.176	-0.0226	-0.0459	-0.0028	-0.0353	0.261	0.0635	0.176	-0.0811	-0.133	-0.106	-0.177	-0.0265	0.112	-0.112	-0.103	0.147	0.00561	0.0868	-0.00244	-0.164
IDUA_HUMAN	IDUA	-0.285	-0.178	0.523	-0.243	-0.112	-0.0311	0.0478	-0.127	0.193	0.0553	0.177	0.0938	-0.0251	0.181	0.223	0.00982	-0.182	0.0273	-0.395	-0.243	-0.00586	0.411	0.119	0.0898	-0.0952	0.0259	-0.0931	-0.0988	-0.472	0.0315
IF4B_HUMAN	EIF4B	-0.0574	-0.0647	-0.352	-0.0475	0.117	0.166	-0.0736	0.397	-0.144	0.735	-0.183	0.0318	0.296	-0.724	0.177	0.143	0.00929	0.271	-0.0639	-0.205	0.136	-0.226	-0.208	0.85	-0.124	-0.463	0.00661	-0.366	-0.2	-0.355
IF5A1_HUMAN	EIF5A	-0.111	-0.433	0.113	0.261	0.577	-0.496	-0.279	1.4	-0.403	2.22	-0.0561	0.622	-0.388	0.684	0.562	1.43	-0.896	-0.0753	-0.165	0.0378	0.0649	0.253	-0.0354	2.01	0.195	-0.285	0.365	-0.0704	-0.441	0.0455
IGF1_HUMAN	IGF1	0.0149	0.0294	-0.263	0.32	0.188	0.184	-0.00702	0.0188	-0.177	-0.264	0.344	-0.0662	-0.237	0.143	-0.177	0.0792	-0.181	0.144	-0.312	0.257	0.514	0.144	-0.278	-0.288	0.426	0.248	-0.123	0.207	0.0154	0.0523
IGF2_HUMAN	IGF2	-0.00949	0.356	0.495	-0.332	-0.191	0.109	0.185	-0.199	0.336	-0.454	-0.237	0.268	0.0573	-0.213	0.0025	-0.149	-0.273	0.516	-0.306	0.123	0.338	0.595	-0.0231	-0.157	0.0652	-0.33	-0.00844	-0.0249	-0.292	0.158
IGG1_HUMAN		-0.183	-0.283	0.778	-0.179	-0.097	0.759	2.15	0.17	-0.0564	0.683	-0.365	-0.102	0.836	-0.0826	0.253	0.487	0.625	-0.332	-0.407	-0.613	3.14	0.453	-0.178	0.361	0.455	-0.0611	0.116	0.0828	0.423	-0.00849
IGHA1_HUMAN	IGHA1	-0.149	-0.28	1.73	-0.238	0.0793	1.77	0.926	-0.117	-0.0723	0.69	0.528	-0.0991	0.543	-0.537	-0.907	0.413	0.34	0.597	0.295	0.81	2.3	0.64	0.0435	-0.0333	1.21	-0.106	-0.222	-0.125	0.608	-0.157
IGHG2_HUMAN	IGHG2	0.0571	-0.173	0.988	-0.0515	0.0293	0.799	2.46	-0.0345	0.29	0.137	0.723	0.5	1.55	0.264	0.223	-0.367	-0.22	0.114	-0.153	-0.372	3.04	0.256	-0.269	0.00785	-0.0493	0.04	-0.0994	0.0254	0.338	-0.111
IGHG3_HUMAN	IGHG3	-0.129	-0.307	0.583	-0.00286	-0.152	0.212	1.71	0.178	-0.663	0.523	-0.0793	1.26	-0.596	-0.452	-1.07	0.28	-0.437	0.593	0.433	0.181	2.62	0.0397	-0.345	0.148	0.979	-0.202	0.15	-0.132	-0.0232	-0.149
IGHG4_HUMAN	IGHG4	-0.302	-0.316	0.922	-0.48	-0.715	0.939	1.71	-0.706	0.12	-1.14	-0.092	0.94	-0.0435	-0.332	-0.0179	0.151	-0.285	0.537	0.432	-0.705	2.59	0.115	-0.895	-0.55	-0.398	-0.338	-0.554	-0.37	0.0784	-0.524
IGHM_HUMAN	IGHM	-0.283	-0.473	1.58	-0.449	0.646	1.33	0.438	-0.0213	-0.306	0.467	0.753	0.158	-0.688	1.08	-0.276	0.164	-0.11	-0.182	-0.224	0.635	1.32	0.147	0.573	1.02	0.59	-0.348	-0.364	-0.198	0.178	-0.348
IGKC_HUMAN	IGKC	-0.248	-0.325	0.62	-0.118	0.0617	0.493	1.52	-0.276	-0.0409	0.36	-0.235	0.139	0.395	0.213	-0.176	0.216	0.792	-0.515	0.117	0.0214	2.06	0.439	0.0242	0.157	0.293	-0.22	0.104	0.188	-0.0737	0.326
IGL1_HUMAN		-0.0915	-0.153	0.8	0.0684	0.0106	0.602	1.45	0.0239	-0.274	0.146	0.41	0.508	-0.396	-0.117	-0.58	0.103	-0.369	0.471	0.179	0.289	1.97	0.219	-0.0768	0.265	0.634	-0.0654	0.0315	-0.207	0.152	-0.263
IGLC2_HUMAN	IGLC2	-0.213	-0.61	0.627	0.0769	0.156	0.47	1.74	-0.00496	-0.343	0.176	0.0041	0.893	-0.721	0.58	-0.504	0.232	-0.392	-0.0244	-0.0301	0.379	2.63	0.255	0.237	-0.176	0.913	0.101	0.144	-0.174	0.524	-0.259
IGLO5_HUMAN	IGLON5	0.0947	0.146	0.15	-0.0936	-0.0587	0.133	-0.0523	-0.0106	0.02	-0.0445	-0.0142	-0.15	0.0229	0.127	-0.046	-0.098	0.0797	0.0461	0.202	0.127	0.00615	-0.0263	0.0442	-0.101	0.00553	0.0229	-0.124	-0.0311	0.0491	0.138
IGS21_HUMAN	IGSF21	0.0655	0.15	-0.00112	0.0143	0.0627	0.209	-0.00607	-0.00579	0.051	-0.138	-0.0291	-0.0574	-0.00354	-0.0958	-0.142	-0.0583	0.0175	0.317	0.0938	-0.00242	-0.171	-0.0703	0.0234	0.0394	0.00578	0.108	-0.0347	-0.0209	0.0596	-0.011
IGSF1_HUMAN	IGSF1	0.0354	0.267	0.117	0.0487	-0.31	-0.0363	-0.13	-0.286	-0.0298	-0.305	0.0418	-0.00533	0.447	-0.0405	-0.111	0.24	-0.164	-0.187	-0.0543	0.0447	-0.195	0.0483	0.13	-0.29	-0.222	0.198	-0.0805	0.108	-0.0175	0.0334
IGSF8_HUMAN	IGSF8	-0.0534	0.107	0.113	-0.0681	-0.0665	-0.0376	-0.0129	-0.051	0.0137	-0.212	0.0181	-0.0117	0.00433	-0.231	-0.0229	0.0535	0.0653	0.0545	-0.0131	-0.028	0.00674	0.00882	0.057	-0.092	0.000491	-0.0458	-0.242	0.159	-0.0785	0.0345
IL17D_HUMAN	IL17D	0.000617	-0.0313	0.249	-0.163	0.0664	0.137	0.421	-0.0036	0.0245	-0.0726	0.0448	0.0669	0.0743	-0.256	0.00311	0.0329	0.253	-0.174	0.1	0.00552	0.0374	0.481	0.137	-0.166	0.338	0.0739	0.07	-0.00537	0.0446	0.29
IL1AP_HUMAN	IL1RAP	0.209	0.381	0.00768	-0.321	0.0631	-0.243	0.454	-0.273	-0.112	-0.344	0.403	0.356	-0.476	0.0569	0.0248	-0.324	0.536	-0.447	-0.274	0.23	0.252	-0.0505	-0.0302	-0.187	0.142	-0.302	-0.329	0.875	-0.0292	0.00344
IL1R2_HUMAN	IL1R2	0.0427	-0.436	-0.00405	-0.0439	0.0309	0.138	0.252	0.117	0.4	-0.24	0.0848	0.569	-0.536	-0.461	-0.138	-0.056	-0.0961	-0.123	0.123	0.336	0.708	0.248	0.217	0.0772	0.567	-0.21	-0.359	-0.0684	-0.404	-0.136
IL27B_HUMAN	EBI3	-0.0449	-0.0576	-0.258	0.109	-0.132	-0.353	0.071	0.317	-0.0544	0.288	0.0856	-0.154	0.063	-0.142	-0.281	0.364	0.126	0.00755	-0.12	0.0165	0.192	0.0241	0.217	-0.303	0.203	0.182	0.258	0.208	-0.0638	-0.381
IL6RA_HUMAN	IL6R	0.0367	0.209	-0.544	-0.104	0.159	-0.414	0.225	-0.114	-0.533	0.199	0.499	-0.293	-0.142	0.407	-0.241	0.19	0.697	0.0338	-0.384	-0.027	-0.184	-0.0811	-0.169	0.0193	0.139	-0.0916	0.163	0.582	-0.333	0.359
IL6RB_HUMAN	IL6ST	0.0639	0.0216	-0.173	0.147	-0.0128	-0.0208	-0.0403	0.0467	-0.101	-0.209	-0.0281	-0.275	0.0884	0.0602	-0.0176	-0.059	0.144	0.0912	0.19	-0.0565	-0.153	-0.0871	0.0772	0.137	-0.194	0.0141	-0.0435	0.0854	0.147	-0.0454
ILDR2_HUMAN	ILDR2	0.131	-0.102	0.228	0.0521	0.184	0.273	0.0914	-0.21	0.101	-0.31	0.0313	-0.0642	0.0622	0.115	-0.186	0.167	-0.0874	0.14	-0.0718	0.0629	-0.00708	-0.0604	0.00615	0.594	-0.213	0.335	-0.0049	-0.15	-0.0755	-0.186
ILEU_HUMAN	SERPINB1	0.0124	-0.151	-0.27	0.184	0.0212	-0.0526	0.0554	0.262	-0.0759	0.717	0.0308	0.0294	-0.22	0.308	0.158	0.243	0.0637	-0.0738	-0.059	-0.0555	0.113	-0.117	0.204	0.501	0.239	-0.211	-0.219	0.193	0.0521	-0.0756
IMPA1_HUMAN	IMPA1	2.04	-0.0103	-0.0266	0.0186	-0.16	0.00332	-0.0848	0.00911	0.00987	-0.079	1.51	-0.223	0.116	-0.172	0.0551	-0.0443	0.0549	-0.202	0.0699	-0.00848	0.64	0.0548	-0.202	0.0442	-0.404	0.244	-0.0412	0.0138	0.0821	-0.0476
IMPA3_HUMAN	IMPAD1	-0.158	0.0167	-0.144	0.227	-0.0423	-0.178	-0.154	0.228	-0.0463	-0.106	-0.00556	-0.444	0.0898	0.0745	-0.168	-0.184	0.063	0.165	0.285	0.0543	-0.212	-0.354	0.033	-0.14	-0.16	0.14	0.0883	0.182	0.254	0.0908
INAM1_HUMAN	INAFM1	0.185	0.0276	0.72	-0.287	0.14	0.546	-0.432	-0.49	0.386	-0.0241	-0.621	-0.0182	0.366	-0.501	0.131	0.147	0.419	0.556	-0.0952	-0.0811	-0.787	-0.0928	0.0892	-0.211	-0.152	0.191	-0.127	0.0922	0.0136	0.377
INAM2_HUMAN	INAFM2	-0.203	0.00544	-0.185	0.145	-0.0796	0.221	0.0831	-0.0163	-0.142	-0.424	0.0272	-0.00345	0.118	0.295	-0.0856	-0.276	-0.322	0.109	0.0494	0.109	0.0924	0.283	0.0253	-0.0989	0.187	-0.173	-0.111	-0.192	0.00582	-0.0538
INGR1_HUMAN	IFNGR1	0.007	0.022	-0.201	0.187	0.0239	-0.0532	0.041	-0.0879	0.163	-0.331	-0.083	-0.031	0.32	-0.251	-0.00816	-0.0589	0.215	0.222	0.147	-0.00474	-0.2	0.0932	0.0688	-0.125	-0.359	-0.041	0.0888	0.0257	-0.0396	0.0245
IPSP_HUMAN	SERPINA5	0.0687	-0.272	0.143	0.064	0.206	-0.28	0.711	-0.0249	0.057	-0.377	0.357	0.737	-0.275	-0.0693	0.212	-0.218	-0.00379	-0.402	-0.0629	0.16	0.868	0.138	0.202	-0.108	0.692	-0.251	0.243	-0.0254	-0.387	0.0409
IRPL1_HUMAN	IL1RAPL1	0.143	0.254	-0.151	-0.0125	-0.201	0.262	-0.203	0.0406	0.0919	-0.324	-0.203	0.113	0.203	-0.188	0.214	-0.0955	0.301	-0.0527	-0.166	-0.156	-0.579	0.0875	0.0779	-0.0179	-0.373	0.107	0.0522	0.0383	0.0133	-0.0477
ISK5_HUMAN	SPINK5	0.285	-0.179	0.123	-0.177	0.17	0.159	0.162	-0.194	0.12	-0.479	0.0582	0.259	-0.438	-0.265	-0.342	0.138	0.209	-0.157	0.159	0.0838	0.85	-0.17	0.274	-0.17	0.212	-0.1	-0.252	-0.0555	-0.125	-0.00214
ISLR_HUMAN	ISLR	-0.0754	0.154	-0.0335	-0.309	-0.0639	-0.114	0.0382	0.0139	0.196	-0.169	0.0191	0.0939	-0.172	-0.052	0.104	-0.202	-0.00771	0.00619	-0.0878	0.352	0.0953	0.152	0.0569	0.0597	0.287	-0.167	0.0285	-0.053	-0.13	0.0541
ISLR2_HUMAN	ISLR2	-0.0754	0.0194	-0.245	0.157	0.0782	-0.0305	-0.0899	0.118	-0.0153	0.13	-0.0541	0.00824	0.309	-0.0589	-0.148	0.172	0.0644	0.0141	0.0288	-0.0914	-0.099	0.0373	-0.0863	-0.0568	-0.296	0.221	-0.0601	0.0866	0.0887	-0.00652
ITAM_HUMAN	ITGAM	-0.186	-0.0441	-0.000578	-0.102	0.0825	-0.162	0.178	0.0469	0.123	0.246	0.0473	-0.128	-0.00247	0.104	0.0561	-0.0906	-0.255	-0.21	-0.237	0.105	-0.0235	0.181	0.0735	0.147	0.115	-0.379	-0.0919	0.131	-0.111	-0.0137
ITB1_HUMAN	ITGB1	-0.0725	0.193	0.0259	-0.0171	-0.0877	0.0425	0.00739	0.0259	0.1	-0.303	0.117	0.0404	-0.102	0.225	-0.116	0.024	-0.11	-0.0821	-0.0289	0.211	0.212	0.0875	0.0173	-0.287	0.225	-0.0967	0.0122	0.0892	0.146	-0.0306
ITGBL_HUMAN	ITGBL1	0.0015	0.311	0.171	-0.0916	-0.154	0.0855	-0.00451	-0.23	0.372	-0.29	-0.0188	0.241	-0.136	-0.165	0.291	0.0778	0.323	0.33	-0.194	0.131	-0.147	0.355	0.196	-0.251	-0.049	0.0864	-0.0343	0.381	-0.0946	-0.0667
ITIH1_HUMAN	ITIH1	0.0741	-0.712	0.124	-0.487	0.51	0.168	0.483	-0.449	-0.00461	0.0125	0.604	0.546	-0.658	0.135	-0.298	-0.21	-0.192	-0.893	-0.134	0.133	0.768	0.062	0.0769	0.219	0.749	-0.801	-0.127	-0.275	-0.625	-0.133
ITIH2_HUMAN	ITIH2	0.302	-0.655	0.352	-0.652	0.653	0.511	0.546	-0.659	0.205	-0.335	0.505	0.937	-0.554	0.188	-0.343	-0.217	-0.0761	-1.11	-0.162	0.363	0.797	-0.0805	0.17	0.401	0.857	-0.691	-0.0382	-0.211	-0.821	-0.0393
ITIH3_HUMAN	ITIH3	0.562	-0.208	0.594	-0.286	0.448	-0.0634	-0.233	-0.429	0.164	0.45	0.532	0.217	-0.446	0.695	-0.328	-0.178	-0.0623	-0.637	-0.357	0.0893	0.593	0.0589	0.24	0.0946	0.782	-0.225	-0.409	0.092	-0.569	-0.36
ITIH4_HUMAN	ITIH4	-0.0213	-0.248	0.257	-0.449	0.704	0.365	0.287	-0.726	-0.0557	0.0383	0.478	0.561	-0.666	0.238	-0.458	-0.418	0.0815	-0.702	-0.319	-0.0137	0.814	0.482	0.14	0.153	0.528	-0.687	-0.225	-0.0408	-0.778	-0.193
ITIH5_HUMAN	ITIH5	-0.133	0.0142	0.258	-0.17	-0.12	-0.225	0.0842	-0.065	0.0229	0.105	0.0573	-0.123	0.131	0.19	-0.0449	0.0623	-0.166	0.0491	-0.105	-0.0701	0.189	-0.065	-0.0168	-0.195	-0.181	-0.0135	0.0838	0.034	0.0439	0.0995
ITM2A_HUMAN	ITM2A	-0.0012	-0.0673	0.525	-0.33	-0.0664	0.0539	0.131	-0.156	0.143	0.0459	0.25	-0.00477	-0.0659	-0.392	-0.222	-0.173	-0.179	0.142	-0.0537	-0.297	0.276	-0.0282	0.132	0.117	0.213	-0.147	-0.227	-0.0507	-0.222	0.0473
ITM2B_HUMAN	ITM2B	-0.0844	0.0147	0.213	-0.294	-0.11	-0.0791	-0.00477	-0.0614	-0.188	0.231	-0.0157	-0.00772	0.0542	-0.417	0.021	0.00374	0.0816	0.203	-0.168	0.135	0.00327	0.13	0.13	-0.0431	0.199	-0.241	-0.0968	-0.0684	-0.168	-0.00312
ITM2C_HUMAN	ITM2C	-0.0312	-0.0279	-0.0476	0.128	0.204	-0.22	0.276	0.00395	0.00394	-0.243	0.204	0.125	-0.025	0.191	-0.213	-0.131	-0.0655	-0.151	0.0554	0.0499	0.106	0.228	0.0213	0.0133	0.0967	-0.139	-0.0244	-0.0991	-0.0677	-4.74e-05
JAM2_HUMAN	JAM2	0.0771	0.0703	0.229	-0.347	-0.0552	0.182	-0.00731	-0.108	0.0967	-0.218	-0.0661	0.0499	0.155	-0.289	-0.0863	0.116	-0.037	0.231	0.167	-0.0539	-0.281	0.206	-0.0783	-0.201	-0.09	-0.106	0.1	-0.0262	-0.0882	0.193
JAM3_HUMAN	JAM3	0.0658	-0.00545	-0.312	0.36	0.00493	-0.0484	-0.00662	-0.045	0.134	-0.106	-0.0123	-0.0294	0.286	-0.0278	0.0872	0.16	0.277	-0.0721	-0.271	-0.113	-0.23	-0.314	0.324	-0.308	-0.203	0.498	0.149	0.128	0.316	-0.127
JAML_HUMAN	JAML	-0.164	0.353	0.333	0.314	-0.233	-0.286	0.59	-0.0508	0.252	-0.644	0.0832	-0.572	0.181	0.689	-0.675	0.0496	-0.572	0.463	-0.0123	-0.106	0.424	0.0257	-0.501	-0.35	0.135	0.163	0.463	0.462	-0.0843	-0.464
JMJD8_HUMAN	JMJD8	-0.211	-0.013	0.447	-0.459	-0.133	-0.0563	0.0225	-0.224	-0.0491	0.156	0.0732	0.0149	0.281	-0.268	-0.177	0.468	0.372	-0.439	-0.144	-0.206	-0.208	0.2	-0.0852	-0.0221	0.116	-0.000694	0.194	0.295	-0.137	0.17
K154L_HUMAN	KIAA1549L	-0.0855	0.000708	-0.333	0.255	-0.0219	0.0773	-0.0696	-0.00537	-0.12	-0.25	0.11	-0.0724	0.208	0.104	-0.278	0.129	-0.111	-0.0235	0.231	0.109	-0.139	-0.0822	0.0159	-0.0745	-0.281	0.396	0.0741	-0.00509	0.343	0.0286
K1C10_HUMAN	KRT10	-0.587	-0.763	-0.178	0.0403	0.771	1.28	-0.941	0.0563	-0.55	-0.401	-0.666	0.0305	0.189	0.26	-1.12	0.602	0.721	0.224	0.383	-1.07	-0.129	0.339	0.853	0.117	-0.626	0.133	0.947	-0.545	1.41	-0.443
K1C14_HUMAN	KRT14	-0.709	-0.175	-0.403	0.411	0.0618	0.589	0.0471	-0.000158	-0.128	0.196	-0.283	0.175	-0.266	-0.141	-1.56	-0.378	0.336	-0.715	-0.262	-0.215	-0.482	-0.0617	0.4	0.0508	-0.818	-0.0954	-0.0425	0.565	0.802	-0.716
K1C16_HUMAN	KRT16	-0.0984	0.263	0.0361	1.17	0.314	0.301	0.12	-0.443	-0.192	-0.0607	-0.103	0.0322	-0.238	0.821	-0.588	-0.0217	0.709	-0.517	-0.229	-0.206	0.0886	0.0214	-0.257	-0.451	-0.0151	-0.174	0.0034	1.32	0.246	-0.00803
K1C9_HUMAN	KRT9	-0.505	-0.00885	-0.375	-0.24	0.257	1.89	0.638	-0.969	-0.521	-0.445	-0.958	0.735	-0.194	0.162	-0.412	0.0265	1.57	-0.417	0.205	-0.464	0.0543	-0.0417	0.547	0.789	-0.862	0.479	0.229	1.45	-1.2	-0.106
K22E_HUMAN	KRT2	-0.458	-0.823	-0.404	0.192	1.08	1.53	-0.832	0.106	-0.594	0.0509	-0.632	-0.057	0.511	0.392	-1.23	1.05	0.798	-0.174	0.28	-0.889	-0.0688	0.561	1.22	-0.181	-0.837	0.305	0.976	-0.356	1.69	-0.591
K2C1_HUMAN	KRT1	-0.57	-0.185	-0.459	-0.0366	0.483	1.18	-0.0897	-0.3	-0.517	-0.45	-0.857	0.271	0.00623	0.366	-1.03	0.482	1.13	-0.0987	0.291	-0.745	-0.14	-0.146	0.674	0.0759	-0.982	0.196	0.9	0.647	0.768	-0.472
K2C5_HUMAN	KRT5	-0.532	0.113	-0.223	1.44	0.297	1.07	-0.126	-0.217	-0.248	-0.179	-0.553	0.441	-0.0962	0.579	-0.906	0.295	1.24	-0.0887	0.0323	-0.255	-0.184	0.158	0.69	0.605	-0.751	0.199	0.725	0.826	0.844	-0.677
K2C6A_HUMAN	KRT6A	-0.0736	-0.158	0.0317	1.87	0.241	-0.0272	-0.0332	-0.23	0.402	0.0309	-0.466	1.22	0.312	0.602	-0.761	-0.242	0.519	-0.0476	-0.236	0.798	0.0155	0.000706	1.21	-0.0869	-0.849	-0.722	-0.0119	1.92	0.088	-0.449
K319L_HUMAN	KIAA0319L	-0.0828	-0.109	-0.282	0.323	0.0105	-0.278	0.0766	0.0963	-0.266	-0.00993	0.26	-0.302	0.0679	0.408	-0.0961	-0.011	0.0567	-0.0597	0.319	-0.0113	0.0815	-0.0807	0.0304	-0.00642	-0.064	0.253	-0.12	-0.0644	0.365	-0.205
KAD1_HUMAN	AK1	0.0381	-0.41	0.307	0.269	0.425	-0.0363	-0.103	1.01	-0.0264	1.99	-0.184	0.718	-0.0129	0.21	0.213	1.25	-0.702	0.0951	-0.107	-0.461	0.266	-0.0865	-0.0151	2.02	-0.0371	-0.297	0.556	-0.0518	-0.197	-0.182
KAIN_HUMAN	SERPINA4	-0.0918	-0.503	-0.264	0.0404	0.638	-0.107	0.735	0.00823	0.0825	-0.0869	0.313	0.771	-0.683	0.0153	-0.108	0.145	-0.0161	-0.361	-0.19	0.116	0.993	0.134	0.166	0.0899	0.619	-0.392	0.0684	-0.0492	-0.517	-0.102
KAP0_HUMAN	PRKAR1A	-0.077	-0.131	-0.174	0.15	-0.102	-0.125	-0.016	0.0548	-0.0675	0.0299	0.156	-0.0821	0.133	0.00631	0.0549	0.129	0.00165	0.0752	-0.0711	-0.0552	-0.212	-0.119	-0.0492	0.0927	-0.0828	0.133	-0.0407	0.00786	0.0577	-0.0261
KAP1_HUMAN	PRKAR1B	0.00154	0.0179	-0.638	0.217	-0.0613	0.066	-0.0853	-0.0885	0.0261	-0.337	0.0792	-0.57	-0.00436	-0.196	-0.00845	0.125	-0.197	0.0406	-0.0259	0.0369	-0.366	-0.14	-0.0442	-0.125	-0.569	0.104	0.00735	0.0502	0.18	-0.0249
KCC2A_HUMAN	CAMK2A	0.376	0.229	-0.506	0.329	-0.0802	0.312	-0.245	-0.179	0.0602	-0.0206	-0.0372	0.0788	0.554	-0.288	0.15	0.229	-0.0629	0.336	-0.108	-0.6	-0.535	0.0169	-0.182	0.0315	-0.884	0.526	0.289	-0.0197	0.414	-0.0827
KCC2B_HUMAN	CAMK2B	0.165	0.128	-0.213	0.212	-0.265	-0.11	-0.0882	0.104	-0.167	0.149	0.204	-0.287	-0.0763	0.0229	-0.134	-0.109	-0.0966	0.338	0.223	0.0443	-0.292	-0.185	-0.193	0.243	-0.0642	0.0431	-0.111	0.162	0.294	0.0803
KCC2D_HUMAN	CAMK2D	0.116	-0.00964	-0.0819	0.0742	-0.261	0.0103	-0.169	0.118	-0.116	0.247	0.0464	-0.318	-0.085	-0.0653	-0.115	0.00662	0.00742	0.422	0.0955	0.0163	-0.337	-0.18	-0.225	0.0165	-0.136	0.0443	-0.125	0.0873	0.331	0.0354
KCC2G_HUMAN	CAMK2G	0.259	0.0922	-0.751	0.697	-0.00248	0.00259	-0.0129	0.337	-0.0573	0.193	0.445	0.0273	0.0512	-0.233	-0.0728	-0.323	-0.102	-0.105	0.357	0.418	-0.0672	-0.118	-0.115	-0.139	-0.416	0.268	0.181	0.0969	1.03	-0.0936
KCD12_HUMAN	KCTD12	-0.0646	-0.0302	0.0529	0.0047	-0.319	-0.105	0.0634	-0.0574	-0.293	0.0875	0.184	-0.24	-0.176	0.273	0.0237	0.0559	-0.0163	-0.163	0.143	-0.0204	0.136	-0.0169	0.0517	0.226	0.257	-0.215	-0.0762	-0.0246	0.0819	-0.0648
KCRB_HUMAN	CKB	-0.257	-0.0426	0.0314	-0.00618	0.052	0.0289	0.0712	0.163	0.0498	0.12	-0.201	0.224	-0.164	-0.00193	0.319	-0.065	-0.0972	-0.201	-0.162	0.00459	0.32	-0.0518	0.0491	0.345	-0.193	-0.446	-0.0987	0.056	-0.0995	-0.249
KCRM_HUMAN	CKM	0.0542	-0.0684	0.262	-0.369	0.205	-0.093	0.0921	0.0946	0.224	0.777	0.018	0.573	-0.259	-0.404	0.0867	0.373	-0.042	-0.0614	-0.143	0.104	0.582	-0.0173	-0.0705	0.00792	0.018	-0.417	1.36	-0.215	-0.222	0.0555
KCRU_HUMAN	CKMT1A	0.0158	0.114	0.245	-0.0711	-0.0831	0.0189	-0.108	0.116	0.0812	-0.0211	0.0848	-0.263	-0.123	0.243	-0.0355	-0.11	0.148	0.0514	0.0154	-0.0157	0.0502	-0.205	0.0256	0.287	0.0204	-0.193	-0.0902	-0.156	0.0419	-0.247
KCY_HUMAN	CMPK1	0.00491	-0.119	-0.0208	0.309	0.408	-0.153	-0.444	0.955	-0.298	1.59	0.0608	0.436	-0.293	0.858	-0.19	0.612	-0.501	0.211	-0.0186	0.111	0.472	-0.0275	-0.196	1.44	0.302	-0.33	-0.0225	-0.198	0.0437	-0.126
KERA_HUMAN	KERA	-0.169	0.29	0.056	-0.306	0.672	0.0353	0.0093	-0.759	0.4	-0.27	-0.226	0.537	0.314	0.153	-0.135	-0.579	0.205	-0.299	-0.794	-0.916	0.28	0.245	0.601	0.7	-0.28	0.339	0.181	0.463	0.071	-0.907
KIRR3_HUMAN	KIRREL3	0.308	-0.0278	0.054	0.0739	0.238	0.115	-0.0897	-0.117	0.051	-0.27	0.0816	0.239	0.269	-0.146	-0.0532	-0.181	0.165	0.0205	0.0571	-0.132	0.511	-0.0583	-0.202	-0.154	-0.144	0.0415	0.0443	-0.14	-0.031	0.0215
KIT_HUMAN	KIT	0.192	0.174	0.207	-0.118	0.00167	0.0408	-0.0266	-0.146	-0.12	0.149	0.0204	-0.234	-0.0756	-0.0562	0.0116	-0.217	0.127	0.17	0.252	-0.0447	0.093	-0.19	0.00091	-0.0967	0.19	-0.0616	-0.209	0.0629	0.0404	0.196
KLK10_HUMAN	KLK10	0.0884	0.151	-0.0491	-0.553	-0.479	0.11	-0.288	-0.000581	0.443	-0.53	-0.063	0.109	-0.121	-0.511	0.112	-0.0431	-0.523	0.256	0.114	-0.751	-0.076	-0.0872	-0.0445	0.0966	0.224	0.07	0.0197	-0.478	0.326	-0.555
KLK11_HUMAN	KLK11	0.0681	0.107	0.452	-0.388	-0.0857	0.26	-0.0755	-0.375	0.151	0.00948	-0.215	0.335	-0.349	-0.319	-0.122	0.664	-0.179	-0.0593	-0.353	-0.662	-0.143	0.185	-0.398	0.401	-0.0369	-0.0226	0.12	0.181	-0.466	-0.0254
KLK6_HUMAN	KLK6	0.126	0.26	-0.0363	-0.00266	-0.0828	0.133	-0.0771	-0.0881	0.18	-0.701	0.0518	0.214	0.191	-0.347	0.228	-0.0939	0.22	0.0712	-0.506	0.0666	-0.402	0.245	0.226	-0.691	-0.183	-0.13	-0.0866	0.226	-0.0957	0.0341
KLK7_HUMAN	KLK7	0.00578	-0.474	-0.189	0.0251	0.447	0.35	-0.0889	-0.0958	0.101	-0.26	0.281	0.389	-0.541	0.308	-0.216	-0.244	-0.0818	-0.577	-0.0962	0.433	0.449	0.0314	0.184	0.117	0.344	-0.0338	-0.201	-0.0155	-0.108	-0.155
KLKB1_HUMAN	KLKB1	0.136	-0.474	0.128	-0.0579	0.553	0.321	0.278	-0.495	0.134	-0.304	0.517	0.57	-0.537	0.213	-0.195	-0.142	-0.00935	-0.592	-0.0173	0.28	0.773	0.397	0.253	-0.0764	0.621	-0.412	-0.0612	-0.0705	-0.358	-0.0759
KNG1_HUMAN	KNG1	0.0666	-0.4	0.34	-0.118	0.811	0.453	0.261	-0.852	-0.00541	-0.219	0.515	0.921	-1.09	0.138	-0.135	-0.207	0.0825	-0.224	-0.191	0.358	0.976	0.72	0.31	-0.0721	0.827	-0.661	-0.105	-0.0292	-0.625	-0.27
KPYM_HUMAN	PKM	0.17	0.0102	-0.00508	-0.0112	-0.079	0.123	-0.307	0.0574	-0.0121	-0.00577	-0.0494	-0.0571	0.0111	-0.164	0.0617	-0.0712	0.0392	0.228	0.02	0.22	-0.382	-0.0274	-0.207	-0.0494	-0.159	0.0113	0.0221	0.0405	0.154	0.0793
KPYR_HUMAN	PKLR	-0.155	-0.302	0.31	-0.0575	0.604	-0.0841	-0.375	0.856	-0.488	2.24	-0.475	0.551	0.0193	-0.161	0.107	1.01	0.763	-0.377	-0.68	-0.273	0.0565	0.415	0.0752	1.54	0.405	-0.253	0.0573	-0.276	-0.635	0.269
KT3K_HUMAN	FN3KRP	-0.042	-0.107	0.244	-0.106	0.181	0.0685	-0.022	0.687	0.00559	1.25	-0.109	0.531	0.0631	0.078	0.0108	0.985	-0.291	-0.0975	-0.0772	-0.149	0.216	0.0652	-0.251	1.04	-0.262	-0.221	0.0998	-0.227	-0.223	-0.13
KV315_HUMAN	IGKV3-15	-0.0163	-0.242	1.11	0.114	-0.212	0.865	1.24	0.0568	0.0694	-0.0952	0.303	0.319	0.337	-0.288	0.0646	0.0601	-0.0414	0.592	0.11	-0.0187	0.728	1.26	0.597	0.647	0.907	0.095	0.565	0.337	-0.683	0.262
KV401_HUMAN	IGKV4-1	0.0495	-0.29	0.117	-0.125	0.029	-0.159	0.2	-0.387	0.0222	0.335	0.133	0.0347	-0.419	0.198	0.315	0.134	-0.0412	0.11	-0.189	-0.293	0.525	0.366	-0.263	-0.122	0.0775	-0.21	-0.00848	-0.0923	-0.398	0.129
L1CAM_HUMAN	L1CAM	0.0162	0.073	-0.0902	0.114	-0.000525	0.41	-0.23	-0.159	-0.071	0.0604	-0.0617	-0.111	0.24	0.0295	-0.0555	0.259	0.0375	0.0183	0.111	-0.231	-0.226	-0.059	0.0439	-0.087	-0.185	0.331	0.0618	-0.016	0.274	-0.0776
LAIR1_HUMAN	LAIR1	-0.00741	0.649	0.156	0.156	0.289	-0.0689	0.111	-0.0206	-0.198	-0.393	-0.159	-0.0737	-0.287	0.0345	-0.287	0.459	0.291	0.556	0.156	-0.115	-0.0419	0.737	0.153	-0.492	0.103	0.013	0.423	-0.00666	-0.12	-0.0514
LAIR2_HUMAN	LAIR2	-0.14	0.243	-0.198	0.343	0.0892	0.0247	0.288	0.123	-0.0574	-0.326	0.207	-0.103	0.154	0.537	0.0382	0.0491	0.0232	-0.341	-0.0844	0.115	0.672	0.158	0.412	0.218	0.753	0.304	0.701	-0.105	-0.132	-0.0931
LAMA2_HUMAN	LAMA2	0.0539	-0.00785	0.145	-0.189	-0.0283	-0.0432	0.0982	-0.1	0.115	-0.0452	-0.132	0.164	-0.0223	0.0701	-0.023	-0.0117	0.0386	0.11	-0.0747	-0.0163	-0.187	0.181	0.173	-0.167	0.00751	-0.0164	0.0428	0.0555	-0.102	0.124
LAMA4_HUMAN	LAMA4	0.0123	0.00887	0.0666	-0.0703	-0.08	-0.0673	-0.0415	0.147	-0.0326	0.837	-0.0682	-0.0134	0.305	-0.361	0.0916	0.187	-0.382	-0.179	-0.0809	0.23	-0.176	0.0707	0.241	0.695	-0.0233	0.0236	-0.0946	-0.235	-0.251	-0.211
LAMA5_HUMAN	LAMA5	-0.00193	0.175	0.0882	-0.201	0.057	-0.112	-0.013	-0.0874	0.219	0.0523	-0.115	0.0547	-0.156	-0.132	0.0895	-0.164	0.494	0.0206	-0.0333	0.136	0.089	0.00166	0.149	-0.0817	0.166	-0.305	0.0412	-0.0579	-0.00123	0.0214
LAMB1_HUMAN	LAMB1	0.0794	0.0102	0.122	-0.169	-0.0547	-0.0522	0.0932	-0.169	0.0406	-0.155	-0.095	-0.0338	0.0655	0.114	0.102	-0.0241	-0.0173	0.0577	-0.099	-0.084	-0.0882	0.163	0.128	-0.015	0.0244	-0.0905	0.0409	0.00707	-0.203	0.0797
LAMB2_HUMAN	LAMB2	-0.00215	0.153	0.0533	-0.135	0.0283	-0.0943	0.0284	-3.65e-05	0.168	-0.0647	-0.113	0.031	0.122	-0.101	-0.0425	-0.0897	-0.0216	-0.0463	0.0743	0.0676	-0.0304	0.0582	0.198	-0.0559	0.066	-0.0495	-0.114	-0.00135	-0.109	0.038
LAMC1_HUMAN	LAMC1	0.146	0.132	0.206	-0.26	-0.0367	0.177	-0.0736	-0.182	0.145	-0.0694	-0.299	0.294	0.0328	-0.112	0.1	0.0113	0.115	0.157	-0.0744	-0.0409	-0.0857	0.286	0.154	-0.258	-0.0236	-0.0228	0.0337	-0.0365	-0.172	0.166
LAMC3_HUMAN	LAMC3	-0.0945	0.104	0.235	-0.308	0.177	0.107	0.148	-0.0207	0.193	0.213	-0.0158	0.136	0.314	-0.107	-0.153	0.101	-0.0776	0.372	-0.156	-0.0682	-0.0422	0.247	-0.156	-0.0676	0.0285	-0.0555	0.0832	0.219	-0.0656	-0.151
LAMP1_HUMAN	LAMP1	0.0513	0.0204	-0.205	0.0158	-0.0314	-0.208	0.204	0.115	-0.0887	-0.146	0.000132	0.133	0.0367	-0.00541	0.178	-0.0705	0.231	-0.154	-0.141	-0.24	0.175	-0.0827	0.0605	-0.3	-0.114	0.145	0.0723	-0.0757	0.134	-0.183
LAMP2_HUMAN	LAMP2	-0.00654	0.0274	-0.695	0.272	-0.113	-0.605	0.248	0.309	-0.0129	0.173	0.18	-0.551	0.144	0.28	0.416	-0.183	0.236	-0.377	-0.0692	0.21	0.073	-0.36	-0.0283	-0.351	-0.32	0.164	0.0264	-0.0313	0.649	-0.131
LARG1_HUMAN	LARGE1	0.0271	0.336	-0.0874	0.0224	-0.0411	0.351	-0.205	-0.102	-0.0649	-0.38	-0.138	-0.251	0.467	0.0311	-0.0505	0.246	-0.178	0.0892	0.0884	-0.184	-0.17	0.0935	-0.0934	0.157	0.267	-0.0604	-0.0324	0.0636	0.19	0.00252
LASP1_HUMAN	LASP1	-0.205	-0.0895	-0.0495	-0.0291	0.201	0.0969	-0.117	0.35	-0.00483	0.719	-0.0809	0.141	0.0504	0.31	0.444	-0.00849	-0.431	-0.144	0.321	0.0129	0.0714	-0.042	-0.133	0.809	0.036	-0.114	-0.115	-0.077	-0.201	0.0865
LAYN_HUMAN	LAYN	0.0399	0.368	-0.375	0.574	-0.111	-0.0159	0.567	-0.0428	0.324	-0.433	-0.0728	-0.152	0.374	0.631	0.101	-0.0682	0.643	-0.0284	-0.0793	0.0259	-0.0608	-0.0115	-0.0497	-0.117	0.00671	0.519	0.0193	0.273	0.673	-0.0683
LBP_HUMAN	LBP	-0.244	-0.765	-0.0359	0.159	0.395	0.0572	0.596	-0.158	0.168	0.672	0.547	1.1	-0.385	0.185	-0.0328	-0.038	-0.114	-0.522	0.0301	-0.347	0.589	-0.668	0.0278	-0.158	1.26	-0.0997	-0.0638	-0.0283	-0.0144	0.512
LCAT_HUMAN	LCAT	-0.158	-0.466	-0.307	0.176	0.0601	-0.44	0.196	0.197	-0.4	0.207	0.217	-0.241	-0.329	0.332	-0.463	-0.193	0.152	-0.0856	0.386	0.106	-0.127	-0.511	0.12	-0.0311	0.0559	0.017	-0.0436	-0.143	0.438	0.0133
LDHA_HUMAN	LDHA	0.123	-0.0965	-0.0286	0.125	-0.168	-0.369	-0.254	0.385	0.0912	0.343	0.411	0.0183	-0.344	-0.00586	0.0413	-0.0957	-0.45	-0.177	0.0464	0.408	0.233	-0.375	-0.418	0.195	0.08	0.167	0.329	-0.154	-0.118	0.287
LDHB_HUMAN	LDHB	0.187	0.128	0.084	-0.0619	-0.0727	-0.0844	-0.154	0.187	0.123	-0.0633	0.0762	0.159	-0.0627	-0.101	0.16	0.0831	-0.259	0.106	-0.0258	0.207	-0.0505	-0.05	-0.16	0.195	-0.0146	0.0243	0.184	-0.176	-0.0622	0.147
LDLR_HUMAN	LDLR	0.0645	0.022	-0.0192	-0.0643	-0.233	0.0778	0.111	0.0875	0.0416	-0.318	0.31	0.0258	-0.168	0.000435	-0.107	-0.105	-0.0717	-0.00834	-0.0451	-0.0275	0.201	0.109	0.107	-0.127	0.12	0.0604	-0.0636	-0.0664	0.0312	0.177
LECT2_HUMAN	LECT2	-0.421	0.169	0.399	-0.32	0.0708	0.00839	-0.817	-0.112	0.399	0.0452	-0.264	0.175	-0.0583	0.464	0.265	-0.151	-0.656	-0.343	-0.197	0.273	0.247	0.0721	0.306	-0.386	0.593	-0.372	-0.554	-0.114	-0.032	0.26
LEG1_HUMAN	LGALS1	-0.328	-0.327	-0.524	0.149	-0.11	-0.548	0.231	0.237	-0.158	0.0489	0.229	-0.35	0.000907	0.507	-0.0498	-0.211	-0.233	-0.567	0.0529	0.244	0.663	-0.364	-0.0412	-0.241	0.222	-0.0942	0.0462	0.0136	0.15	-0.113
LEG3_HUMAN	LGALS3	0.0381	0.195	0.13	-0.241	-0.368	0.0881	-0.0128	-0.119	0.127	-0.00967	-0.0288	0.164	-0.375	-0.169	-0.133	-0.0307	0.099	-0.221	0.0507	0.0618	0.23	0.163	-0.0207	-0.097	0.156	-0.156	-0.125	-0.127	-0.0902	0.0222
LEP_HUMAN	LEP	-0.227	0.142	0.553	-1.61	0.0306	-0.274	-1.28	-1.36	0.241	0.759	0.362	0.756	0.565	-0.0683	-0.292	1.06	-0.109	0.215	-1.78	-0.594	-0.557	0.712	-0.249	0.565	0.0791	-1.36	-1.05	-0.0793	-1.1	0.435
LFA3_HUMAN	CD58	-0.222	-0.252	-0.332	0.114	-0.0261	-0.127	0.306	0.161	-0.0624	0.109	-0.219	-0.101	-0.312	0.196	-0.221	0.0111	-0.131	-0.274	-0.0207	0.327	0.321	0.128	0.043	-0.213	0.0341	-0.0192	0.0656	0.109	0.237	-0.096
LFG2_HUMAN	FAIM2	-0.18	0.181	-0.169	0.598	0.0865	-0.102	-0.146	0.237	0.0985	-0.296	0.154	-0.425	0.531	0.43	0.0425	0.084	-0.174	-0.308	0.369	0.168	-0.385	-0.151	-0.0608	1.13	-0.332	0.223	0.00268	-0.0447	0.233	-0.0935
LFNG_HUMAN	LFNG	0.116	-0.0527	0.256	-0.167	0.0184	-0.0415	0.00813	-0.00977	-0.0132	0.195	0.142	-0.0834	-0.0513	-0.182	-0.0498	-0.0795	0.0405	0.128	0.242	0.0632	-0.077	0.127	-0.0205	-0.193	0.136	0.0107	-0.0365	-0.0255	0.0817	0.133
LG3BP_HUMAN	LGALS3BP	0.0604	0.00168	0.103	-0.152	-0.138	-0.113	0.155	0.00104	0.152	-0.0891	-0.128	0.325	-0.0185	-0.325	0.0754	-0.0861	-0.121	-0.019	-0.213	0.0836	0.114	0.153	0.2	-0.0229	0.0227	-0.15	0.0129	-0.0706	-0.402	0.0812
LGI1_HUMAN	LGI1	0.122	0.293	0.352	-0.423	-0.179	-0.0018	-0.00325	-0.343	0.0851	-0.376	-0.35	0.198	-0.0697	-0.365	0.252	0.153	0.0413	0.297	-0.0829	-0.325	0.141	0.326	0.00494	-0.316	0.134	-0.338	0.0992	-0.0794	-0.303	0.19
LGMN_HUMAN	LGMN	0.0956	0.178	0.558	-0.521	-0.166	0.0404	0.00426	-0.622	0.0333	-0.168	-0.101	0.499	0.191	-0.521	0.0853	0.0211	0.0887	-0.0504	-0.27	-0.401	-0.574	0.388	-0.153	-0.0085	0.0606	-0.0546	-0.188	0.0434	-0.574	0.0859
LGUL_HUMAN	GLO1	-0.0264	-0.237	-0.229	0.167	0.0622	-0.373	-0.225	0.72	-0.264	0.996	-0.139	-0.123	-0.0695	0.462	0.252	0.356	-0.143	-0.213	0.189	0.138	0.52	-0.24	-0.189	0.698	-0.301	0.00852	0.0525	-0.0992	-0.246	-0.163
LHPP_HUMAN	LHPP	-0.0155	0.109	-0.314	-0.0214	-0.146	-0.234	-0.1	0.0969	-0.231	0.237	-8.45e-05	-0.0139	-0.00553	0.00856	-0.0303	-0.0606	0.151	-0.0303	-0.101	-0.202	-0.258	0.0762	-0.139	0.0647	-0.297	-0.141	-0.212	-0.0895	-0.122	-0.0758
LICH_HUMAN	LIPA	-0.19	0.198	-0.355	-0.113	0.106	-0.486	0.458	0.113	-0.181	0.204	0.0407	0.216	0.133	-0.267	0.337	0.135	0.346	-0.0973	-0.44	-0.152	-0.323	0.325	0.17	0.0749	-0.166	-0.268	0.136	-0.245	-0.166	-0.292
LIGO1_HUMAN	LINGO1	0.224	0.206	-0.43	0.084	-0.0941	0.0626	-0.377	-0.195	0.000753	-0.0032	0.149	0.0681	0.252	-0.0741	0.211	0.133	0.305	-0.113	-0.174	-0.464	-0.175	-0.26	0.0449	-0.155	-0.57	0.524	0.288	-0.128	0.27	-0.184
LIGO2_HUMAN	LINGO2	-0.0533	-0.164	-0.235	0.0611	-0.0354	0.0271	-0.349	0.0674	0.0486	0.0386	0.0193	0.098	0.106	-0.227	-0.00683	0.116	0.218	-0.0949	-0.0259	-0.333	-0.105	-0.249	-0.0389	0.0186	-0.291	0.296	0.0585	-0.217	0.0482	-0.153
LIGO3_HUMAN	LINGO3	0.104	-0.0939	-0.023	-0.0698	0.0161	0.16	0.126	-0.00823	0.171	0.0754	0.087	0.145	-0.0602	-0.0819	0.00248	-0.0451	0.269	-0.0482	0.0891	-0.106	-0.0718	-0.101	-0.000762	-0.104	0.117	0.156	0.00175	-0.0874	0.202	0.0111
LIPE_HUMAN	LIPG	-0.0847	0.195	0.107	0.232	-0.0208	-0.292	0.205	0.0326	-0.297	0.00327	-0.153	0.0594	-0.477	0.104	0.0086	0.285	0.184	0.123	-0.0304	-0.115	-0.105	0.0254	-0.181	0.192	0.181	-0.371	-0.0384	-0.157	0.0141	-0.0814
LIPL_HUMAN	LPL	0.0103	0.0351	0.349	-0.281	0.00448	-0.0539	0.152	-0.0236	-0.0503	-0.0322	0.0982	0.0217	-0.0218	-0.199	-0.16	0.116	0.08	0.232	0.172	0.162	0.172	0.0551	-0.0693	0.043	-0.205	-0.0966	0.0748	0.0437	-0.525	-0.196
LIRA2_HUMAN	LILRA2	-0.369	-0.152	0.0496	0.102	-0.00165	-0.0956	0.167	-0.0584	0.0441	-0.404	-0.199	0.119	0.0296	0.0325	0.23	-0.118	0.0116	0.235	-0.115	-0.405	0.0249	0.12	0.321	0.0205	-0.169	-0.244	-0.261	-0.145	0.0397	0.181
LIRA3_HUMAN	LILRA3	0.806	-0.251	-0.16	0.474	0.934	-0.0389	0.614	-0.831	0.18	-0.792	-0.178	1.25	-1.44	-0.394	-1.3	-0.462	-0.194	0.241	0.397	0.537	1.22	-0.172	0.815	-0.291	0.653	-0.338	0.339	0.164	-0.323	-0.263
LIRA4_HUMAN	LILRA4	0.455	0.301	0.0816	-0.107	0.238	-0.025	-0.105	-0.146	0.284	-0.194	-0.062	-0.356	0.0169	-0.251	-0.0963	-0.385	0.016	0.332	0.386	-0.0221	0.45	0.187	0.113	0.15	0.361	-0.195	0.38	-0.106	-0.186	0.0273
LIRB1_HUMAN	LILRB1	0.0657	0.268	0.229	-0.192	0.041	-0.0315	0.129	-0.178	-0.0836	0.0325	-0.0818	0.305	-0.246	-0.193	-0.199	-0.0911	-0.0353	0.191	0.0348	0.0138	0.296	-0.0255	0.0654	0.019	0.211	-0.241	0.234	0.265	-0.0662	-0.208
LIRB4_HUMAN	LILRB4	-0.0931	0.158	0.105	0.0892	-0.0462	0.314	0.0805	0.0446	-0.307	-0.279	0.745	-0.0239	-0.158	-0.0284	0.00556	0.0163	-0.114	-0.0484	-0.12	-0.13	-0.298	0.231	0.0743	-0.193	-0.349	-0.0785	0.161	0.232	-0.0258	0.108
LIRB5_HUMAN	LILRB5	-0.0584	0.679	-0.462	0.286	-0.254	0.103	0.256	0.0313	-0.212	-0.0888	0.455	0.322	-0.166	-0.359	0.136	-0.0555	-0.225	0.366	-0.0518	-0.0387	0.463	0.118	0.194	0.166	0.507	-0.0334	-0.0469	0.054	-0.625	-0.0662
LIS1_HUMAN	PAFAH1B1	0.00126	-0.148	-0.0401	0.205	-0.0846	0.0646	-0.11	0.285	-0.151	0.554	-0.0481	-0.251	0.102	0.176	-0.0325	-0.0229	-0.158	0.209	0.222	0.244	0.062	-0.178	-0.269	0.17	-0.0714	-0.0192	-0.142	0.111	0.0725	0.052
LKHA4_HUMAN	LTA4H	-0.0636	-0.244	-0.152	0.086	0.316	-0.15	-0.00579	0.429	-0.092	1.01	0.185	0.488	-0.409	0.0711	0.42	0.124	-0.136	-0.138	-0.174	0.179	0.348	-0.0117	0.296	0.178	1.13	-0.2	0.035	-0.0803	-0.174	-0.138
LMAN1_HUMAN	LMAN1	0.133	0.264	0.187	-0.0608	-0.054	-0.000496	0.0771	-0.00606	-0.0679	-0.106	0.0513	-0.171	-0.0192	0.0112	-0.125	-0.204	-0.0148	0.281	0.125	0.141	-0.063	0.0263	0.152	-0.102	0.179	-0.0755	0.111	0.191	-0.192	0.235
LMAN2_HUMAN	LMAN2	0.0988	-0.0471	-0.0581	0.0358	-0.169	-0.162	-0.0828	0.142	-0.0805	0.112	0.0424	-0.219	0.174	0.117	-0.284	-0.0384	0.194	-0.0119	0.0594	0.22	-0.25	0.00899	-0.00325	0.282	-0.145	0.106	-0.0564	-0.0392	0.0229	0.0755
LOXL3_HUMAN	LOXL3	-0.0211	0.2	0.315	-0.0989	-0.117	0.0904	0.0196	-0.102	0.0356	-0.187	-0.235	0.273	0.0302	-0.0113	0.0096	-0.132	-0.105	0.224	-0.0654	0.111	0.0328	0.324	-0.17	-0.126	-0.12	0.0673	0.114	-0.0436	-0.124	0.186
LRC4B_HUMAN	LRRC4B	-0.159	-0.0971	-0.185	0.305	-0.0167	-0.0901	0.0533	0.176	-0.0488	0.358	0.0548	-0.143	0.127	0.161	0.0887	-0.0267	0.334	-0.117	0.0618	-0.183	-0.241	-0.197	-0.0621	0.0806	-0.194	0.131	0.048	0.0508	0.257	-0.108
LRC4C_HUMAN	LRRC4C	-0.101	-0.272	-0.209	-0.0256	0.335	-0.149	-0.165	0.275	-0.236	0.583	0.2	-0.0488	0.024	0.151	-0.0537	0.161	0.121	-0.408	0.0117	-0.051	0.372	0.0876	-0.0656	0.222	-0.183	0.0597	-0.00629	-0.0535	0.171	-0.072
LRFN1_HUMAN	LRFN1	-0.0164	0.00511	0.342	0.0475	-0.211	-0.145	0.286	0.142	-0.312	-0.118	0.348	0.0306	-0.0785	0.134	-0.0819	0.0821	-0.198	-0.205	0.133	-0.068	0.217	0.573	-0.0384	-0.251	0.251	-0.0605	0.109	0.175	-0.0154	-0.216
LRFN2_HUMAN	LRFN2	0.263	0.159	-0.378	0.0141	0.117	0.0515	-0.203	0.0126	-0.0661	-0.117	0.0162	0.0779	0.174	0.145	0.00361	-0.175	-0.127	-0.0412	0.187	-0.118	-0.149	-0.0161	-0.201	-0.0304	0.011	0.215	-0.00542	-0.0755	0.191	-0.0318
LRFN5_HUMAN	LRFN5	0.0249	-0.0458	-0.238	0.369	-0.0579	-0.151	-0.215	0.0235	0.129	0.323	0.202	-0.105	0.343	0.218	-0.00923	-0.122	0.0902	-0.262	-0.0291	-0.261	0.0457	0.0138	0.0585	-0.0822	-0.321	0.334	0.312	-0.24	0.284	-0.0304
LRIG1_HUMAN	LRIG1	0.0463	-0.109	-0.127	-0.162	0.0156	-0.123	0.0733	-0.123	-0.14	0.0137	0.0685	0.08	0.0729	0.209	-0.0271	-0.00415	0.13	-0.117	-0.0764	-0.233	0.193	0.0295	-0.00886	0.00393	-0.0138	0.117	0.158	-0.00886	-0.087	-0.0871
LRIG2_HUMAN	LRIG2	-0.0439	0.0475	-0.108	0.0288	-0.0857	-0.0493	-0.00757	0.064	-0.144	-0.168	0.225	-0.0441	0.0345	0.0592	0.0602	0.0505	0.109	-0.153	-0.0312	-0.115	0.128	-0.253	-0.0177	0.0413	0.00679	0.0247	-0.0285	0.0537	0.0966	-0.172
LRP1_HUMAN	LRP1	0.0757	-0.0243	-0.0788	-0.00636	-0.151	-0.0983	0.0685	-0.0909	-0.000704	-0.00404	-0.00452	-0.142	-0.0245	0.11	0.0337	0.00598	0.0274	0.0552	0.0951	-0.0664	0.0369	-0.122	0.03	-0.117	0.0157	0.000113	0.00743	-0.0571	0.129	-0.0982
LRP11_HUMAN	LRP11	-0.0069	0.0261	-0.163	0.36	-0.0832	0.0251	-0.224	0.0313	0.0407	-0.088	0.0775	-0.128	0.059	0.167	-0.139	0.00502	-0.146	-0.153	0.168	-0.147	-0.271	-0.0649	-0.00816	0.0217	-0.307	0.199	0.174	0.0282	0.267	-0.0592
LRP1B_HUMAN	LRP1B	0.167	0.132	0.0251	-0.0384	-0.142	0.207	0.0588	-0.0773	0.0977	-0.104	-0.112	-0.137	0.0987	0.0183	0.177	0.0658	0.14	0.141	-0.0749	-0.188	-0.111	-0.0202	-0.0232	-0.114	-0.155	0.293	0.115	-0.0232	0.164	-0.118
LRP4_HUMAN	LRP4	0.114	-0.106	0.00823	0.0472	0.124	0.141	-0.172	-0.0433	-0.146	0.187	-0.189	-0.11	0.312	-0.0878	0.112	-0.106	0.392	-0.0135	0.186	-0.0504	-0.168	0.0386	0.0307	-0.291	-0.177	0.243	0.158	-0.0698	0.266	-0.196
LRP8_HUMAN	LRP8	0.129	0.0928	-0.164	0.181	-0.103	0.0651	-0.105	0.032	0.0032	-0.126	0.327	-0.168	0.185	0.0977	0.0746	-0.145	-0.0327	-0.205	0.117	-0.0549	-0.193	-0.113	-0.0697	-0.0648	-0.331	0.236	0.163	-0.0261	0.048	0.123
LRRC4_HUMAN	LRRC4	0.152	-0.063	0.0229	0.0504	-0.0149	0.0914	-0.213	-0.111	0.0622	0.0936	-0.0791	0.0702	-0.00236	0.00686	-0.0857	-0.00353	0.369	0.162	-0.0404	-0.22	-0.0604	-0.104	0.121	0.0931	-0.0671	0.201	0.162	0.0339	0.0983	-0.0536
LRRN1_HUMAN	LRRN1	-0.104	-0.00674	-0.115	0.0167	0.0375	0.113	0.0165	0.037	0.00294	-0.0142	-0.0286	-0.11	-0.0129	0.0535	-0.172	0.0794	-0.0268	-0.0807	-0.0596	0.0328	-0.0718	-0.0814	-0.0339	-0.00986	-0.00391	0.103	-0.00542	-0.0395	0.124	-0.0342
LRRT2_HUMAN	LRRTM2	-0.166	-0.0475	-0.476	0.398	-0.0224	-0.177	0.0199	0.28	-0.0816	0.773	0.139	-0.0957	0.469	0.139	0.0389	0.136	-0.0691	-0.433	0.0943	-0.201	-0.29	-0.00108	0.173	0.0964	-0.42	0.501	0.0605	-0.0701	0.182	-0.0245
LRTM1_HUMAN	LRTM1	0.332	-0.149	-0.0418	0.24	-0.268	-0.638	0.047	0.168	-0.245	1.33	0.841	0.186	-0.491	-0.0559	-0.0143	-0.305	0.549	-0.402	0.109	-0.165	0.627	0.0659	-0.0393	-0.368	0.341	-0.345	-0.476	0.137	0.026	0.544
LRTM2_HUMAN	LRTM2	-0.00166	0.257	-0.0964	-0.00807	-0.00925	0.0514	-0.225	0.174	-0.317	0.361	-0.0126	0.0468	0.0815	-0.0429	-0.0642	0.46	0.0574	-0.0261	0.0922	-0.17	-0.0996	-0.139	0.0555	-0.0233	-0.0257	0.454	0.0159	-0.0503	0.177	0.285
LSAMP_HUMAN	LSAMP	0.0946	0.165	0.179	-0.144	0.000947	0.236	-0.103	-0.189	0.143	-0.291	-0.16	-0.153	0.2	-0.0879	0.171	0.0492	0.137	0.132	-0.161	0.0978	-0.42	0.17	0.036	0.0172	-0.236	0.0634	-0.0556	-0.00858	-0.0139	0.117
LSR_HUMAN	LSR	-0.00554	0.121	0.261	-0.129	0.111	-0.0396	0.0261	-0.00843	0.0189	-0.213	-0.0465	-0.0312	0.209	0.0376	-0.138	-0.0793	-0.0766	0.152	-0.207	0.0751	-0.00612	0.1	0.0776	0.0137	-0.00233	-0.0245	-0.0934	-0.0811	-0.149	0.176
LTBP1_HUMAN	LTBP1	-0.26	0.127	-0.0186	0.0755	-0.211	0.101	0.247	-0.16	-0.0137	0.0787	0.108	0.16	0.195	-0.202	-0.147	-0.241	-0.0601	-0.103	0.0124	0.263	-0.0306	0.0487	0.175	-0.275	-0.272	0.637	0.0935	0.0153	-0.217	-0.0132
LTBP2_HUMAN	LTBP2	-0.226	-0.0411	-0.0345	-0.172	-0.00336	-0.226	0.094	0.299	0.4	0.0376	-0.189	0.0562	-0.0864	0.0394	-0.155	0.0162	-0.194	0.367	-0.132	0.329	0.461	0.162	0.122	0.0271	0.125	-0.221	0.0474	-0.118	-0.0928	-0.014
LTBP4_HUMAN	LTBP4	-0.0071	0.296	-0.0534	-0.0752	-0.068	-0.105	-0.0107	0.0357	0.315	-0.0541	-0.288	0.104	0.045	0.0013	0.0297	-0.15	-0.0554	0.259	0.136	0.14	0.187	0.28	0.351	-0.155	-0.0293	0.0446	-0.0333	0.0158	-0.0712	0.0165
LTOR3_HUMAN	LAMTOR3	0.0432	-0.382	-0.507	0.0876	0.0337	-0.388	0.342	0.309	-0.385	0.459	0.014	-0.967	-0.0143	-0.0298	0.302	-0.244	-0.455	-0.181	0.72	0.00396	0.0711	-0.454	-0.587	-0.186	-0.462	0.148	0.141	0.169	0.375	0.0155
LTOR5_HUMAN	LAMTOR5	-0.0246	-0.304	-0.467	0.211	-0.0362	-0.122	0.0376	0.342	-0.301	0.0141	-0.0896	-0.505	-0.375	-0.336	0.138	0.0594	0.301	0.249	0.12	0.0825	-0.36	-0.392	0.0954	0.0793	-0.423	0.385	-0.0888	0.0548	0.0799	0.0353
LUM_HUMAN	LUM	-0.26	0.204	0.126	-0.327	0.188	-0.136	0.419	-0.102	0.313	-0.566	-0.315	0.386	-0.864	0.401	0.0813	-0.107	0.0357	0.0909	-0.0902	-0.0455	0.746	-0.419	0.165	-0.0122	0.579	-0.312	-0.135	0.0796	-0.535	0.183
LUZP2_HUMAN	LUZP2	0.0496	-0.0237	-0.0767	-0.169	0.213	0.0554	-0.0471	-0.0564	-0.0326	-0.314	-0.0952	-0.0274	-0.000596	-0.156	-0.257	0.196	0.109	0.1	0.043	0.0968	0.0561	0.172	0.108	-0.0668	-0.0542	-0.0826	0.138	0.126	-0.0973	0.185
LVX54_HUMAN	IGLV10-54	-0.831	-0.326	1.1	-0.0807	-0.0383	1.51	0.527	-0.1	0.085	-0.0718	0.667	1.16	0.0987	0.524	-0.353	-0.812	0.143	0.752	-1.17	-0.781	1.76	0.46	-0.882	-0.939	1.05	-0.232	0.215	-0.0578	0.843	-0.923
LXN_HUMAN	LXN	0.45	-0.436	0.218	0.897	1.39	0.0963	-0.0658	1.46	0.0994	1.89	0.403	1.33	0.00296	0.0625	-0.757	2.36	0.00696	0.0692	-0.499	-0.105	0.445	0.00488	-0.129	3.33	0.239	-1.28	0.11	-0.185	-0.0899	0.194
LY6E_HUMAN	LY6E	0.0704	-0.0212	0.0643	0.547	-0.25	-0.119	-0.0448	0.201	-0.111	0.0187	-0.0269	-0.345	-0.122	0.405	0.0859	0.0824	-0.187	-0.0316	0.215	0.0738	-0.0297	-0.197	-0.0577	-0.134	-0.323	0.397	0.363	0.172	0.21	0.294
LY6H_HUMAN	LY6H	0.0194	0.0521	-0.477	0.582	0.0452	-0.15	-0.129	0.311	0.0219	-0.0586	-0.0858	-0.461	0.345	0.295	-0.102	0.161	0.107	-0.192	0.158	0.491	-0.237	-0.102	0.392	-0.203	-0.593	0.357	0.0427	0.278	0.503	0.159
LY75_HUMAN	LY75	0.038	0.0492	0.0894	0.193	-0.121	-0.122	0.199	-0.00313	-0.171	-0.322	0.257	-0.0271	0.0862	-0.188	-0.00321	-0.255	0.149	-0.0792	0.0238	-0.449	0.154	0.331	0.01	-0.185	0.31	-0.142	-0.0201	-0.0209	-0.0873	0.0708
LY86_HUMAN	LY86	0.179	-0.00025	0.183	-0.263	0.325	-0.0768	-0.0972	0.0802	0.0616	-0.388	0.0346	0.31	-0.257	-0.202	0.00316	-0.0223	0.227	0.445	-0.222	-0.133	-0.0919	0.492	-0.0884	-0.115	0.173	0.272	-0.00111	-0.202	-0.288	0.143
LYAG_HUMAN	GAA	0.0585	-0.186	0.0282	-0.00438	0.0683	-0.153	-0.488	0.0346	0.109	0.144	0.154	0.0617	-0.441	-0.132	-0.0156	-0.125	-0.116	-0.00593	0.0323	0.0124	-0.189	0.155	0.00869	0.0515	-0.00251	-0.128	0.138	0.121	-0.181	-0.135
LYAM1_HUMAN	SELL	-0.185	-0.084	0.22	0.54	-0.306	-0.248	0.134	4.56e-05	-0.168	0.0203	-0.138	0.172	-0.276	0.111	-0.507	0.137	-0.0846	-0.454	0.222	0.45	0.291	0.082	-0.128	0.00712	0.485	-0.404	-0.359	0.125	0.142	-0.0501
LYOX_HUMAN	LOX	-0.0773	-0.0886	-0.0726	0.0491	-0.0235	0.128	0.357	-0.0096	0.0306	0.152	-0.228	0.377	-0.0573	-0.013	0.0748	-0.0666	0.0331	0.185	-0.143	0.032	0.259	-0.0599	0.127	0.334	-0.0814	-0.102	0.00111	-0.168	-0.0899	0.103
LYSC_HUMAN	LYZ	0.144	0.344	0.133	-0.21	0.351	-0.21	0.197	-0.0846	0.38	-0.326	-0.139	0.315	-0.366	0.184	-0.583	-0.0742	0.234	-0.00473	-0.505	0.212	0.58	0.139	-0.0868	-0.125	0.321	-0.0121	-0.0517	-0.0395	-0.089	-0.256
LYVE1_HUMAN	LYVE1	-0.328	0.331	0.183	0.231	-0.37	0.0767	0.031	-0.26	-0.0195	0.0266	-0.00265	-0.189	-0.206	0.232	-0.143	0.0891	-0.0792	-0.00265	-0.314	0.297	0.0731	0.329	-0.0651	-0.297	0.201	-0.188	-0.0082	0.151	-0.217	0.19
MA1A1_HUMAN	MAN1A1	-0.0395	0.0428	-0.0307	0.137	-0.0404	-0.067	-0.133	0.0576	-0.00238	-0.066	0.0971	-0.0943	0.141	0.0241	-0.17	0.00379	0.00966	-0.00754	0.02	0.0339	-0.187	-0.0695	0.0238	-0.0251	-0.0776	0.114	0.0059	-0.0616	0.00922	0.111
MA1A2_HUMAN	MAN1A2	-0.0198	-0.173	0.000925	-0.0418	0.134	0.0321	0.0324	0.0198	0.0399	0.0368	0.115	-0.17	0.0363	0.0846	0.092	0.192	0.0558	-0.00537	0.163	0.164	-0.0455	-0.152	0.0244	-0.222	0.0933	0.152	0.0561	-0.0487	0.0409	-0.00458
MA1B1_HUMAN	MAN1B1	0.0534	-0.0237	0.0567	0.136	-0.224	-0.137	0.0182	-0.0898	-0.0712	-0.0629	0.0321	-0.239	0.165	0.0899	-0.0775	-0.0923	0.0871	-0.0552	0.149	0.128	-0.0263	-0.0849	0.0543	-0.0995	-0.0598	0.136	-0.00494	-0.00109	0.246	0.0684
MA1C1_HUMAN	MAN1C1	0.0413	-0.00282	-0.141	0.147	-0.112	-0.4	0.132	0.309	-0.219	0.317	-0.00163	-0.0857	-0.0893	0.404	-0.0136	0.0657	-0.159	-0.175	0.119	0.00226	0.455	-0.106	-0.0612	0.0827	0.125	0.068	0.129	-0.294	0.02	0.0371
MA2A1_HUMAN	MAN2A1	-0.117	0.0144	-0.196	0.132	-0.0658	-0.125	0.0262	0.0672	0.0449	0.0259	0.00847	-0.223	0.203	0.0672	-0.0501	-0.0537	-0.00161	-0.15	0.0279	0.126	-0.0648	-0.178	-0.0956	0.0598	-0.0264	0.0893	-0.103	-0.000616	0.15	-0.0097
MA2A2_HUMAN	MAN2A2	-0.141	-0.179	-0.161	0.19	0.0141	-0.146	-0.0315	0.0417	0.0194	0.112	-0.099	-0.206	0.18	0.0594	0.00041	-0.13	-0.133	-0.0349	0.199	0.0193	0.226	-0.252	0.00926	0.0152	-0.181	0.121	-0.00357	0.0169	0.117	-0.102
MA2B1_HUMAN	MAN2B1	-0.0646	-0.0922	0.109	-0.251	-0.0194	-0.191	0.025	0.2	-0.00899	0.307	-0.00286	0.138	-0.0891	0.0712	-0.0908	0.0293	0.237	0.0378	-0.213	-0.252	0.254	0.0833	-0.138	-0.0222	0.00803	0.0703	0.0152	-0.255	0.0398	-0.151
MA2B2_HUMAN	MAN2B2	0.0489	-0.0658	0.37	-0.153	-0.0709	0.0182	0.0507	0.0729	-0.172	0.473	-0.194	0.145	0.2	-0.355	0.13	-0.0106	0.257	0.0325	-0.0304	0.00426	0.109	-0.106	-0.141	0.411	-0.103	0.101	0.327	0.00309	-0.153	-0.0708
MAG_HUMAN	MAG	0.146	0.237	-0.14	-0.232	-0.248	0.157	-0.0306	-0.0519	0.0621	-0.215	-0.185	0.0513	-0.00522	-0.164	-0.103	0.075	0.389	0.0916	-0.361	0.268	-0.0267	-0.122	0.106	0.0661	0.0445	-0.13	-0.0293	0.0905	-0.303	0.166
MANBA_HUMAN	MANBA	-0.0143	0.0685	0.0438	-0.115	-0.172	-0.201	0.0578	-0.049	-0.0985	0.211	-0.0379	-0.182	-0.162	0.0916	0.016	0.274	0.0288	0.0109	0.0627	0.101	-0.00514	-0.0677	0.00316	-0.106	0.000824	-0.016	-0.0822	0.0773	0.301	-0.113
MANEA_HUMAN	MANEA	-0.556	0.231	0.572	0.395	0.202	0.454	0.428	0.114	0.171	0.101	-0.491	0.087	0.146	0.215	0.478	-0.133	-0.274	-0.22	-0.332	0.224	-0.324	-0.183	0.054	0.253	-0.0205	-0.0606	-0.0121	-0.412	0.563	0.111
MANEL_HUMAN	MANEAL	-0.0557	0.0868	-0.135	0.201	0.0367	0.0096	-0.0894	0.105	-0.0762	-0.0337	-0.00511	-0.0964	-0.0445	0.119	0.126	0.0077	0.205	-0.0729	0.109	-0.107	-0.218	-0.0696	-0.0766	0.216	-0.305	0.157	-0.0573	0.00506	0.0899	-0.0322
MANS1_HUMAN	MANSC1	0.166	0.207	0.131	-0.0773	0.1	0.286	-0.0276	-0.0561	0.014	-0.0517	0.000918	-0.285	0.203	0.000939	-0.12	0.0655	-0.00119	0.13	-0.0214	0.0455	-0.214	-0.0636	-0.021	-0.0943	-0.192	-0.00684	-0.166	0.0667	0.0432	0.115
MAOX_HUMAN	ME1	0.316	0.258	-0.115	0.237	-0.532	-0.152	-0.0358	-0.0557	0.205	-0.093	0.103	-0.39	0.148	0.238	0.0177	0.0685	-0.0158	-0.352	0.0075	0.138	0.0692	-0.166	-0.0916	-0.0835	-0.316	-0.114	0.171	-0.0426	0.375	0.078
MARCO_HUMAN	MARCO	-0.17	0.375	0.515	0.04	-0.25	0.468	-0.0434	-0.239	-0.201	0.257	-0.536	0.133	0.0672	-0.6	-0.161	0.515	-0.134	0.767	-0.0814	-0.258	0.119	0.81	-0.515	-0.229	0.355	-0.266	0.144	0.232	-0.311	0.085
MARCS_HUMAN	MARCKS	0.0119	0.0807	-0.0432	0.0295	-0.37	-0.0806	0.0669	0.0353	0.0123	-0.507	0.00948	-0.182	0.166	0.0394	-0.102	-0.0113	-0.294	0.0604	0.017	0.304	-0.171	0.0507	-0.127	-0.239	-0.111	-0.261	-0.142	0.0782	0.128	0.107
MASP1_HUMAN	MASP1	-0.0146	-0.0806	0.185	-0.456	0.101	-0.137	0.0519	-0.217	0.0374	0.131	-0.0682	0.115	0.0384	-0.173	-0.058	-0.228	0.0739	0.157	0.0366	-0.177	0.331	0.134	0.149	-0.0355	0.202	-0.195	-0.0163	-0.117	-0.0713	-0.0463
MASP2_HUMAN	MASP2	0.325	0.216	0.622	-1.33	0.577	0.386	-0.234	-0.514	0.554	-0.193	0.158	1.45	-0.734	-0.455	-0.316	-0.029	-0.707	0.186	-0.28	0.42	1.47	0.869	0.289	-0.2	0.44	-1.22	-0.793	0.0641	-0.589	-0.409
MATN2_HUMAN	MATN2	-0.107	-0.0861	0.101	-0.101	-0.191	-0.175	0.384	-0.162	-0.00561	-0.134	0.052	-0.0458	-0.04	-0.0315	0.0182	0.0524	-0.145	0.221	-0.0371	-0.0144	0.128	-0.0164	0.146	-0.124	0.0819	-0.0593	-0.0237	0.165	-0.196	0.173
MATN3_HUMAN	MATN3	-0.267	0.0312	0.178	0.0243	-0.00588	-0.21	0.262	-0.319	-0.364	0.199	0.203	-0.124	-0.0911	0.105	-0.111	-0.424	0.136	-0.303	-0.171	0.102	0.06	-0.0493	-0.223	-0.217	0.146	0.203	0.0765	-0.0488	0.041	-0.126
MBL2_HUMAN	MBL2	-0.15	0.153	-0.929	-0.182	1.43	0.635	0.995	0.256	-0.374	-0.686	-0.0328	0.93	-0.27	0.123	-1.04	0.205	-0.517	1.05	-0.115	0.357	1.54	0.553	0.83	0.196	-0.119	-0.969	-0.576	1	-0.969	-0.547
MBP_HUMAN	MBP	0.147	-0.000909	0.27	-0.168	0.0826	0.154	0.0657	-0.149	0.23	-0.315	-0.217	0.0476	0.217	-0.152	0.136	-0.313	0.0686	-0.0663	-0.237	0.16	-0.141	0.329	0.034	-0.0402	-0.00554	-0.0526	-0.214	0.000823	-0.118	0.228
MDGA1_HUMAN	MDGA1	-0.000516	-0.0809	0.209	-0.0728	-0.0786	0.268	0.0334	-0.0499	0.0989	0.0819	-0.0503	-0.0324	-0.011	-0.0695	0.06	-0.0604	0.416	0.244	0.177	-0.0903	-0.224	-0.189	0.0286	0.292	-0.158	-0.0872	0.00186	-0.0298	0.09	-0.0681
MDGA2_HUMAN	MDGA2	0.0736	0.052	-0.321	0.163	0.0971	0.0932	-0.111	-0.0121	0.0375	-0.0081	0.0886	-0.102	0.251	-0.0128	-0.0782	0.172	0.0162	-0.0655	0.0382	-0.0937	-0.0867	0.0268	-0.0786	-0.0745	-0.312	0.301	0.0123	0.000181	0.137	0.00401
MDHC_HUMAN	MDH1	0.222	0.102	-0.0517	-0.0168	-0.0724	0.122	-0.47	-0.0637	0.0587	-0.0762	-0.156	0.0026	0.106	-0.334	0.238	0.0584	-0.0631	0.0435	-0.0242	-0.0885	-0.47	-0.0875	-0.254	-0.102	-0.35	0.177	0.0868	0.0586	0.1	0.0294
MDHM_HUMAN	MDH2	0.127	-0.0264	-0.116	-0.173	-0.0234	0.121	-0.22	0.025	0.0404	0.191	-0.0748	-0.0108	0.0641	-0.264	0.256	0.003	0.0828	0.0207	-0.0606	-0.308	-0.319	-0.0342	-0.306	-0.0237	-0.22	0.152	0.0392	0.0477	-0.0556	-0.11
MEGF8_HUMAN	MEGF8	0.211	-0.0197	-0.148	-0.0212	-0.206	0.257	0.0131	-0.197	0.13	-0.0658	-0.0902	-0.247	0.0867	0.0622	0.219	-0.0368	0.11	0.142	0.0581	-0.0467	-0.106	-0.123	0.107	-0.295	-0.146	0.233	-0.0275	-0.0481	0.333	-0.206
MENT_HUMAN	MENT	0.0201	0.162	0.322	-0.181	-0.296	0.149	-0.0571	-0.171	0.174	-0.171	0.0833	-0.3	0.0733	-0.104	-0.0429	0.0476	0.234	0.213	0.148	0.416	0.0766	-0.194	-0.113	0.566	-0.319	-0.0388	-0.141	-0.158	-0.369	0.011
MER34_HUMAN	ERVMER34-1	0.0119	-0.295	0.274	0.0649	-0.194	-0.0496	0.154	0.352	-0.058	0.424	0.235	0.0164	0.0124	0.326	0.174	0.012	-0.0324	-0.365	0.0454	-0.269	0.0498	0.156	0.124	0.295	-0.14	-0.093	-0.0282	-0.255	0.00913	-0.248
MERTK_HUMAN	MERTK	-0.108	0.199	0.0904	0.0448	0.224	0.0814	0.197	0.125	-0.164	0.233	-0.116	-0.00329	0.268	0.049	-0.0168	0.118	0.132	0.0169	-0.0485	-0.228	-0.115	-0.0448	-0.0107	-0.0673	-0.119	0.209	0.065	-0.00417	0.152	-0.1
MESD_HUMAN	MESD	-0.215	-0.0273	0.0573	0.0537	-0.0654	0.00382	0.274	-0.052	-0.144	0.00642	0.0695	-0.0174	0.121	0.0631	-0.162	-0.0203	-0.171	0.0265	-0.0901	0.0707	0.155	0.0153	-0.0612	-0.207	-0.072	0.027	-0.284	0.0055	0.0807	0.0568
MET_HUMAN	MET	0.0194	0.157	-0.00661	-0.0953	-0.00326	0.113	-0.00178	-0.0469	-0.0523	0.239	0.158	0.034	0.151	-0.0711	-0.111	0.177	0.0041	-0.15	0.28	-0.145	-0.0146	0.00265	-0.021	0.375	-0.144	0.197	0.103	0.142	0.131	-0.196
METK2_HUMAN	MAT2A	-0.117	0.131	0.142	0.0323	-0.0433	-0.067	-0.17	0.187	0.217	0.443	-0.0811	-0.38	0.0156	0.0864	0.024	0.178	0.0556	-0.0383	0.0795	0.178	0.288	0.0936	-0.0566	0.384	0.135	-0.128	0.104	-0.03	-0.0412	-0.0817
METRL_HUMAN	METRNL	-0.00247	0.005	0.161	-0.345	0.0291	0.0687	0.0383	-0.141	0.199	-0.118	-0.0773	0.113	-0.0489	-0.215	-0.206	0.108	0.00573	0.0396	-0.0253	0.157	0.228	0.132	-0.0794	-0.109	0.139	-0.107	0.0655	-0.0298	-0.193	-0.00857
METRN_HUMAN	METRN	0.076	-0.0575	0.0702	-0.134	0.0201	-0.0479	0.0482	0.00547	-0.000993	0.242	0.164	0.0568	-0.133	0.0568	-0.105	-0.0625	-0.125	0.0808	0.224	0.113	-0.243	-0.137	-0.0133	-0.14	0.158	0.166	0.0288	0.0248	-0.125	0.00592
MFAP4_HUMAN	MFAP4	-0.176	0.0691	-0.0987	-0.254	-0.402	-0.292	0.0807	0.00507	0.085	-0.426	-0.389	-0.23	0.0675	0.102	0.0415	-0.0614	-0.025	0.15	0.0257	-0.135	-0.216	-0.0659	0.163	-0.0438	-0.356	-0.0406	0.106	-0.0928	0.178	-0.0226
MFGM_HUMAN	MFGE8	-0.0497	-0.158	-0.37	0.103	-0.0191	-0.535	-0.238	0.319	0.315	0.151	0.226	-0.2	0.21	0.108	-0.0327	-0.162	-0.352	-0.236	-0.0102	0.388	0.179	-0.113	0.00793	-0.448	-0.285	0.0663	0.377	-0.0193	0.326	-0.0993
MGAT1_HUMAN	MGAT1	-0.0602	0.166	0.0906	0.118	-0.0851	-0.337	0.249	0.359	-0.165	-0.153	0.0408	-0.0849	-0.155	0.428	-0.0621	0.00686	-0.423	-0.0723	0.0701	0.172	0.228	-0.14	-0.149	-0.215	0.319	0.0458	0.0899	0.0749	0.0697	-0.0401
MGAT2_HUMAN	MGAT2	-0.00411	-0.0448	-0.0504	0.0234	-0.0994	-0.321	0.0712	0.0392	-0.0203	-0.0293	0.0939	-0.356	0.0072	0.124	-0.0882	-0.0317	0.039	-0.0175	0.228	-0.0006	-0.0751	-0.185	-0.0121	-0.155	0.0338	0.144	-0.00483	0.0362	0.229	0.0164
MGAT3_HUMAN	MGAT3	0.188	0.182	0.466	-0.115	-0.117	0.219	0.116	0.129	-0.158	-0.0327	0.157	-0.359	-0.0763	0.775	-0.191	7.03e-05	-0.0876	0.252	0.159	0.139	-0.0844	-0.0981	0.304	0.383	0.0246	-0.0234	-0.2	-0.0261	0.0671	-0.0424
MGDP1_HUMAN	MDP1	0.00942	-0.125	-0.167	-0.0124	0.306	-0.146	-0.0143	0.315	-0.237	0.631	-0.138	-0.17	-0.00474	-0.456	-0.0472	-0.0767	0.355	-0.447	0.306	0.379	0.163	0.144	0.385	0.457	0.233	-0.14	-0.0502	-0.153	-0.0947	-0.0617
MGP_HUMAN	MGP	-0.318	0.00185	-0.055	0.126	0.387	-0.323	0.0919	0.482	0.318	-0.0347	0.0226	-0.248	-0.56	0.211	-0.0471	0.00813	-0.301	0.00813	-0.139	0.658	0.643	-0.346	0.0877	0.0932	0.384	-0.071	0.126	-0.202	-0.0588	0.135
MGT4A_HUMAN	MGAT4A	-0.146	-0.0857	-0.148	0.244	-0.187	-0.043	-0.129	0.243	-0.0268	-0.164	0.0837	-0.487	-0.167	0.0452	-0.149	0.0278	-0.294	0.0475	0.114	0.163	-0.171	0.000237	0.0404	0.145	-0.000945	0.0447	-0.0382	-0.0692	0.273	-0.119
MGT4B_HUMAN	MGAT4B	-0.0258	0.0295	0.0174	0.102	-0.0566	0.219	-0.07	0.0309	-0.107	-0.111	0.118	-0.218	-0.0162	0.143	-0.0935	-0.114	-0.0502	-0.0365	0.151	0.124	0.0154	-0.177	0.0605	0.00338	-0.131	0.107	-0.0501	0.0013	0.0616	0.112
MGT5A_HUMAN	MGAT5	-0.0369	-0.17	-0.0281	0.127	-0.062	-0.152	-0.0118	-0.063	-0.0881	-0.0818	0.0561	-0.299	0.0275	0.0998	0.0811	-0.0388	0.057	-0.104	0.144	0.0891	-0.00255	-0.231	-0.0321	-0.124	0.0575	0.0832	0.0303	0.0304	-0.02	0.176
MIA_HUMAN	MIA	-0.183	0.182	-0.597	0.0744	-0.272	-0.401	0.727	0.0411	0.0309	-0.058	-0.0976	0.19	-1.01	0.613	-0.26	0.397	0.127	-0.387	0.00687	-0.206	0.49	-0.0731	-0.257	0.0861	-0.0615	-0.084	0.229	0.358	-0.811	0.48
MIA3_HUMAN		0.00198	0.141	-0.0167	0.131	-0.164	-0.09	-0.0839	0.0217	-0.142	0.128	-0.0634	-0.00614	0.00472	-0.0431	-0.0137	-0.04	0.0695	0.281	0.0805	-0.0952	-0.196	0.0519	0.103	-0.0215	0.0398	0.157	0.0143	-0.0677	0.00128	-0.119
MIF_HUMAN	MIF	0.343	-0.649	-0.388	-0.212	0.0444	0.0509	0.387	0.0493	-0.407	0.0818	0.302	0.0533	0.429	-0.197	0.604	0.142	0.594	-0.773	-0.796	0.205	-0.902	0.192	-0.17	0.196	0.308	-0.236	-0.0175	0.236	0.0477	0.056
MIME_HUMAN	OGN	0.0875	0.174	0.206	-0.254	-0.0868	-0.788	0.0273	-0.295	0.2	-0.315	-0.224	0.161	-0.196	-0.287	0.0315	-0.053	-0.239	0.444	0.0324	0.237	0.353	0.168	-0.272	-0.329	0.0357	-0.0226	-0.0258	-0.289	-0.179	0.278
MINP1_HUMAN	MINPP1	0.0654	-0.0863	-0.00625	0.127	0.0316	-0.144	0.116	-0.0889	0.0294	-0.265	0.154	-0.112	-0.134	0.0552	-0.149	-0.101	0.00755	-0.147	0.048	0.0311	0.152	-0.0791	0.0783	-0.229	0.156	0.0878	-0.0293	-0.0553	-0.0132	-0.00345
MK01_HUMAN	MAPK1	-0.117	-0.126	-0.274	0.00186	0.0461	-0.231	0.355	0.232	-0.416	0.326	-0.362	0.382	-0.197	-0.0814	-0.0998	-0.062	0.311	0.106	-0.147	-0.036	-0.124	-0.605	-0.401	0.262	0.167	0.0581	-0.0104	0.387	-0.328	-0.542
MLEC_HUMAN	MLEC	-0.0841	-6.45e-05	-0.215	0.183	-0.0625	-0.171	0.0776	0.0813	-0.0849	-0.19	0.0514	-0.139	-0.0516	0.133	-0.0481	-0.16	0.182	0.00415	-0.00269	0.224	-0.106	0.026	0.143	-0.169	0.0183	-0.0134	-0.139	0.187	0.0806	-0.058
MLP3B_HUMAN	MAP1LC3B	0.0483	-0.0883	-0.116	-0.0761	-0.132	0.0778	-0.105	-0.0507	-0.0945	-0.0497	0.136	-0.0185	0.0527	-0.0462	-0.207	-0.0052	-0.0241	-0.156	0.066	0.187	0.222	-0.0433	-0.0238	0.0268	0.175	-0.0155	-0.0422	-0.0234	-0.0426	-0.0459
MLRS_HUMAN	MYLPF	0.247	0.124	0.262	-0.199	0.216	0.22	-0.171	-0.00661	0.167	0.418	-0.0341	-0.0448	-0.275	-0.259	0.446	-0.14	-0.189	-0.219	-0.0129	0.259	0.0699	-0.0783	0.118	0.212	0.224	-0.595	-0.143	-0.323	-0.137	0.174
MMP14_HUMAN	MMP14	-0.419	-0.105	0.188	-0.107	-0.127	-0.25	0.195	0.108	0.0295	0.171	-0.189	-0.336	-0.0942	0.0711	-0.0931	-0.0576	-0.271	-0.092	0.181	0.333	0.187	-0.414	-0.202	0.0233	0.271	0.0119	-0.0657	0.12	-0.0214	0.332
MMP15_HUMAN	MMP15	0.115	-0.0996	0.126	-0.0569	0.228	0.0327	0.218	0.0419	-0.0954	0.198	-0.0178	0.162	0.0848	-0.109	0.233	-0.238	-0.126	-0.154	0.0488	0.0207	-0.131	-0.0416	-0.112	0.358	0.14	-0.0994	0.0838	-0.0552	0.0405	-0.00413
MMP17_HUMAN	MMP17	-0.201	0.0308	0.134	0.0697	0.0565	0.0918	-0.109	0.067	-0.0254	0.192	0.00735	-0.175	0.0425	-0.0182	-0.128	0.147	-0.0111	-0.165	-0.027	0.154	-0.00743	-0.0829	-0.171	0.18	0.104	0.142	0.125	-0.0965	-0.00208	-0.103
MMP2_HUMAN	MMP2	0.00237	0.162	0.0727	-0.321	-0.0586	-0.246	0.2	-0.125	0.0397	0.109	0.00201	0.236	-0.0621	0.0595	0.0463	-0.228	-0.127	0.268	-0.291	-0.088	0.146	0.202	-0.0563	-0.217	0.354	-0.207	-0.00769	0.0866	-0.21	0.108
MMP24_HUMAN	MMP24	-0.0308	-0.13	0.226	0.184	-0.109	-0.00314	-0.0665	0.239	-0.206	0.252	0.0868	-0.146	-0.0621	-0.105	-0.0319	0.0524	0.00337	0.185	0.509	0.00232	0.0923	-0.00183	-0.0347	0.0692	0.261	-0.163	-0.00259	-0.0448	0.329	-0.0431
MMRN2_HUMAN	MMRN2	0.011	-0.0323	-0.255	0.0707	0.168	-0.211	-0.113	0.219	0.181	-0.266	0.261	-0.123	-0.235	0.0875	0.125	-0.163	-0.248	-0.0146	0.0903	0.124	0.116	-0.334	0.0982	-0.0937	0.327	-0.0173	-0.186	0.169	-0.119	0.25
MOES_HUMAN	MSN	-0.133	0.00893	-0.297	0.113	0.175	-0.373	0.0447	0.156	-0.0747	0.25	0.0657	-0.00668	0.00312	0.239	0.192	-0.0775	-0.0972	-0.525	-0.0991	0.216	0.0676	-0.128	0.275	0.314	-0.00907	-0.219	-0.0595	0.114	-0.0326	-0.108
MOG_HUMAN	MOG	0.022	0.0911	0.0836	-0.0753	-0.0308	-0.0337	-0.32	-0.171	0.262	-0.33	-0.154	0.0964	0.266	-0.114	0.086	-0.207	0.0819	0.129	-0.34	0.0663	-0.276	0.172	0.0323	-0.287	-0.138	-0.00206	0.093	0.139	-0.128	0.192
MOXD1_HUMAN	MOXD1	-0.202	-0.117	-0.498	0.218	0.0916	-0.247	0.205	0.187	0.0201	-0.449	0.223	-0.0496	0.237	-0.192	0.12	-0.0791	0.133	-0.44	-0.013	-0.166	0.385	0.00669	0.1	0.169	-0.0791	0.0186	-0.0632	-0.274	0.298	-0.32
MPI_HUMAN	MPI	-0.0578	-0.0592	-0.183	-0.00919	0.00537	-0.0511	-0.168	0.17	0.0596	0.0875	-0.0531	-0.112	0.292	0.284	-0.0294	0.0176	0.0414	0.0166	0.126	-0.0814	-0.37	-0.184	-0.135	0.0198	-0.241	0.163	-0.00656	0.0654	0.258	0.0304
MPRI_HUMAN	IGF2R	-0.00277	0.0416	-0.0606	-0.0997	-0.143	0.143	0.0636	-0.111	0.0168	-0.188	-0.0283	-0.0493	0.121	-0.0636	-0.161	0.00346	0.0189	-0.0555	0.0221	0.0575	0.023	0.00525	0.00475	-0.202	-0.141	0.0243	0.00798	0.0816	0.156	0.101
MRC1_HUMAN	MRC1	-0.191	0.172	0.238	0.203	-0.0968	0.112	0.0817	-0.061	-0.0273	-0.413	-0.244	-0.255	0.0482	0.0391	-0.0439	-0.122	0.000112	0.00901	0.285	0.218	-0.241	0.113	-0.154	-0.147	0.198	-0.017	-0.119	0.0761	0.0525	0.223
MRC2_HUMAN	MRC2	-0.00613	0.0769	-0.162	0.0528	-0.048	-0.156	0.106	-0.0599	0.0205	0.0541	0.141	-0.0136	0.0235	-0.0873	0.000712	0.00661	0.052	0.051	-0.208	-0.106	-0.000834	0.114	0.0115	-0.136	-0.0272	-0.00464	0.0889	0.0156	-0.0434	-0.104
MSLN_HUMAN	MSLN	-0.1	0.0056	-0.0194	0.506	0.15	0.0343	0.139	0.0339	-0.056	-0.177	0.351	-0.199	0.168	-0.038	0.106	0.547	0.228	-0.345	-0.164	0.381	0.0107	0.413	0.123	0.228	0.0443	-0.106	-0.0578	0.22	-0.133	-0.122
MTAP_HUMAN	MTAP	-0.12	-0.225	-0.142	-0.112	0.095	-0.223	-0.349	0.708	-0.193	0.948	0.0344	-0.118	0.187	0.486	0.538	0.363	-0.0194	-0.767	0.0246	0.143	0.428	0.0283	-0.11	0.694	-0.137	-0.241	-0.439	0.0554	0.0877	-0.127
MTPN_HUMAN	MTPN	-0.0779	-0.598	-0.0472	0.127	0.408	-0.349	0.0105	0.819	-0.343	1.5	0.534	0.334	-0.0684	0.256	0.317	0.413	0.113	-0.561	-0.253	-0.188	0.303	-0.0433	-0.156	0.993	0.273	-0.199	0.217	-0.375	-0.0259	-0.115
MUC18_HUMAN	MCAM	-0.0956	-0.0841	0.176	0.00371	-0.241	0.0583	0.0656	0.172	-0.0813	-0.067	-0.178	-0.429	-0.0335	0.283	0.00478	-0.264	0.101	0.0863	0.147	0.0855	-0.203	-0.219	0.0528	-0.0134	0.083	-0.212	-0.263	0.0806	-0.08	0.0714
MUC24_HUMAN	CD164	-0.00979	-0.17	-0.324	-0.153	0.556	-0.117	-0.0774	1.24	-0.197	2.29	-0.365	0.264	0.222	-0.796	-0.135	1.22	-0.318	-0.253	-0.0379	0.954	0.479	0.439	-0.925	0.951	0.48	-0.0638	0.298	-0.294	-0.668	0.63
MXRA8_HUMAN	MXRA8	0.029	-0.00455	0.015	-0.0834	-0.103	-0.125	0.0165	0.0539	0.116	-0.145	0.0157	-0.0182	-0.155	0.0777	0.0115	-0.132	0.0253	0.13	0.0202	-0.0497	0.102	-0.069	0.0282	-0.0452	0.107	-0.149	-0.0402	0.0196	0.109	0.0742
MYDGF_HUMAN	MYDGF	-0.097	0.288	0.0733	-0.028	0.072	-0.105	-0.204	-0.275	-0.161	-0.428	0.123	-0.204	0.155	-0.133	-0.0775	-0.0929	0.0333	0.124	0.299	0.13	-0.302	0.0566	0.0204	-0.204	0.0155	-0.0512	-0.107	-0.0276	0.188	0.372
MYG_HUMAN	MB	-0.354	-0.233	2.1	0.1	-0.147	-0.251	0.456	-0.247	0.0532	1.65	0.187	0.103	0.0334	-0.0947	1.32	0.967	-0.785	-0.0621	-0.136	0.81	2.32	0.00389	-0.0509	-0.18	0.208	-0.239	2.25	0.0134	0.754	0.714
MYH1_HUMAN	MYH1	0.134	0.0156	0.2	-0.176	0.144	-0.0891	0.0741	0.00948	0.117	0.414	-0.0015	0.165	-0.188	-0.252	0.047	0.12	-0.0835	0.0184	-0.129	0.158	0.252	0.258	0.132	0.252	0.275	-0.365	-0.0133	-0.0726	-0.127	0.125
MYH2_HUMAN	MYH2	-0.127	-0.302	0.0712	-0.764	-0.146	-0.363	-0.244	-0.396	-0.102	0.408	-0.897	-0.00573	-1.09	-0.941	-0.786	1.04	-1.08	-0.572	-0.926	-0.875	-0.3	-0.0683	-0.12	0.887	-0.0549	-0.928	-0.329	-0.599	-0.508	-0.299
MYH4_HUMAN	MYH4	0.252	-0.0608	0.235	-0.285	0.172	-0.136	0.0699	-0.108	0.146	0.252	0.0906	0.193	-0.293	-0.231	0.212	-0.102	-0.0718	-0.0237	-0.173	0.00834	0.333	0.222	0.119	0.141	0.285	-0.376	0.022	-0.106	-0.127	0.111
MYH6_HUMAN	MYH6	0.191	-0.0583	0.2	-0.233	0.111	-0.245	-0.00735	-0.0174	0.171	0.254	0.334	-0.0994	-0.356	-0.151	-0.0325	0.102	-0.115	-0.273	-0.089	0.152	0.241	0.256	0.1	0.404	0.126	-0.406	-0.0756	-0.153	-0.106	0.0725
MYH9_HUMAN	MYH9	-0.0874	-0.13	0.126	0.0268	0.4	-0.0527	0.198	0.374	-0.194	1.04	0.177	0.432	-0.264	0.686	0.493	0.229	-0.189	0.0705	-0.0789	-0.135	-0.0527	0.0108	0.371	0.824	0.563	-0.0979	-0.171	-0.0518	-0.0152	-0.128
MYL1_HUMAN	MYL1	-0.00403	-0.000878	-0.0415	-0.317	0.102	-0.213	-0.0806	0.248	-0.161	0.909	0.0923	0.129	-0.304	-0.298	0.354	0.0386	0.138	-0.454	-0.178	0.231	0.01	0.321	0.168	0.237	0.282	-0.58	-0.00471	-0.298	-0.235	0.0144
MYL6_HUMAN	MYL6	-0.0898	-0.0406	-0.0315	-0.146	0.394	-0.0978	-0.0984	0.319	0.119	0.644	-0.282	-0.252	-0.329	0.325	-0.0191	-0.0883	-0.214	0.126	-0.202	0.265	-0.0984	-0.129	0.14	0.231	0.313	-0.188	-0.036	0.121	-0.341	-0.253
MYOC_HUMAN	MYOC	0.451	0.126	0.331	-0.356	-0.2	-0.272	1.18	0.715	-0.137	-0.351	-0.402	0.811	-0.141	-0.0358	0.244	-0.461	0.659	-0.0589	-0.287	0.64	0.994	0.0891	0.0797	-0.275	0.435	-0.462	0.0268	0.0279	-0.325	0.397
MYP0_HUMAN	MPZ	-0.162	0.339	-0.254	-0.154	-0.0548	-0.0589	0.464	0.17	-0.0407	-0.104	-0.0551	0.288	-0.59	0.0602	-0.244	0.382	-0.0671	0.0879	0.263	-0.0142	0.261	-0.0256	-0.088	0.355	-0.124	0.248	0.251	0.205	-0.396	0.151
N2DL2_HUMAN		-0.031	-0.207	-0.298	0.00986	-0.0121	0.331	-0.0195	0.194	-0.0626	0.428	0.322	-0.3	0.178	0.469	-0.187	-0.238	-0.0416	-0.114	-0.11	-0.238	-0.336	0.00584	-0.0687	0.194	-0.3	0.349	0.314	0.0695	0.0843	0.017
NAC2_HUMAN	SLC8A2	-0.0767	-0.281	-0.33	0.283	0.0179	-0.0849	-0.136	0.411	-0.412	0.643	0.395	-0.905	0.328	-0.0441	-0.113	0.133	-0.878	-0.0972	0.0706	0.249	-0.231	-0.49	-0.854	0.353	0.236	0.108	-0.0338	0.1	0.237	0.139
NAGAB_HUMAN	NAGA	-0.0723	0.0958	0.196	-0.248	-0.0915	-0.301	-0.0679	0.0852	-0.0744	0.417	0.0419	0.349	0.0157	-0.116	0.197	0.0106	0.21	0.0514	-0.226	-0.373	-0.0925	0.137	0.0261	-0.171	-0.234	0.0191	0.187	-0.027	0.135	-0.0817
NAGPA_HUMAN	NAGPA	0.00341	0.00343	0.087	-0.0767	-0.0435	0.171	-0.117	-0.0685	0.219	-0.0726	0.0108	0.0789	0.00808	-0.14	0.0766	0.0201	0.131	0.189	-0.0458	-0.125	0.0687	0.251	-0.0225	-0.0618	-0.0255	-0.156	-0.0778	-0.0913	-0.11	0.0608
NAR3_HUMAN	ART3	0.0102	0.0904	-0.68	0.265	0.0102	-0.104	0.197	-0.075	-0.371	0.0254	0.0332	-0.473	0.303	0.122	0.394	0.017	0.336	-0.293	0.198	-0.122	-0.149	-0.297	0.142	-0.0375	-0.349	0.268	0.0433	-0.0923	0.146	0.211
NBL1_HUMAN	NBL1	0.148	0.442	0.531	-0.544	0.218	0.598	-0.193	-0.423	0.316	-0.376	-0.493	0.626	0.0394	-0.673	-0.15	0.264	0.14	0.484	-0.411	-0.359	-0.258	0.665	0.0566	-0.157	-0.21	0.119	-0.0548	0.152	-0.572	0.312
NCAM1_HUMAN	NCAM1	0.0423	-0.00117	0.00853	-0.0492	-0.00718	0.101	0.00611	0.0357	0.00134	-0.241	-0.0704	-0.0818	0.139	-0.0261	0.136	-0.0532	0.129	0.0555	-0.0882	-0.0398	-0.275	0.0218	-0.0818	-0.058	-0.201	0.0602	-0.121	0.0363	-0.00185	0.0203
NCAM2_HUMAN	NCAM2	0.112	0.0579	-0.0451	0.0924	-0.0211	-0.0085	0.0453	0.0202	-0.2	-0.503	-0.198	-0.109	0.174	0.0891	0.136	-0.331	0.148	-0.0329	-0.321	0.0132	-0.326	0.00925	-0.116	-0.457	-0.15	0.0375	-0.12	0.121	-0.0257	0.0746
NCAN_HUMAN	NCAN	0.128	0.216	-0.111	0.0871	-0.0752	0.376	-0.161	-0.27	-0.117	-0.099	0.259	0.234	-0.0659	-0.122	-0.113	0.0339	0.19	0.1	-0.0316	-0.146	-0.264	-0.0197	0.0402	-0.0469	-0.358	0.375	0.145	0.01	0.124	-0.0137
NCHL1_HUMAN	CHL1	0.0147	0.17	-0.186	0.0954	0.00608	0.464	-0.253	-0.203	0.0497	-0.472	-0.0869	0.126	0.443	-0.102	-0.109	0.234	-0.154	0.00303	-0.000474	-0.272	-0.496	0.0161	-0.0769	-0.264	-0.386	0.294	0.0344	0.0388	0.202	0.0858
NCKX2_HUMAN	SLC24A2	0.148	0.0783	0.371	-0.405	0.0287	0.434	-0.163	-0.435	0.00293	-0.00886	-0.306	0.324	0.109	-0.766	-0.0784	-0.0636	0.459	0.395	-0.138	0.0545	-0.305	0.248	0.149	-0.0438	-0.267	-0.106	-0.0774	0.0663	-0.407	0.109
NDK3_HUMAN	NME3	-0.228	-0.077	0.148	-0.104	-0.118	-0.0439	0.0439	-0.0138	0.25	0.0712	0.07	-0.135	-0.241	0.0559	0.0479	0.253	0.129	-0.0067	-0.26	-0.103	-0.238	-0.148	-0.13	0.0946	0.0828	0.0286	-0.0873	0.0618	0.00947	0.136
NDKB_HUMAN	NME2	-0.00178	-0.17	-0.0186	0.206	0.245	-0.0262	-0.304	1.05	-0.0727	1.71	0.0395	0.207	-0.0981	0.296	0.399	1.15	-0.311	-0.265	-0.0472	0.0567	-0.00992	-0.126	-0.204	1.5	0.253	0.201	0.273	-0.0403	0.323	-0.0142
NDNF_HUMAN	NDNF	0.159	-0.23	0.0331	0.32	-0.23	-0.0244	0.355	-0.157	0.153	0.0441	-0.339	0.0368	0.237	0.0107	-0.23	0.0356	0.303	-0.337	0.258	-0.108	0.0325	0.623	-0.00354	-0.26	-0.357	0.0215	0.257	0.195	-0.0061	-0.303
NDRG2_HUMAN	NDRG2	0.124	0.0214	0.178	-0.0624	-0.15	-0.131	-0.0188	0.0942	-0.11	-0.206	0.023	-0.279	-0.0371	0.0543	0.111	-0.0846	-0.0144	0.0523	0.345	0.0579	-0.0528	-0.088	0.123	-0.182	-0.0135	-0.134	0.00158	0.0416	0.137	0.134
NDRG4_HUMAN	NDRG4	0.0109	-0.0889	-0.141	0.357	0.136	-0.366	-0.0552	0.284	-0.337	0.176	0.0224	-0.582	0.16	-0.081	0.186	-0.173	0.154	-0.0516	0.438	-0.0471	0.0196	-0.264	0.0117	-0.127	0.149	-0.117	-0.243	0.0958	0.347	0.0439
NDST1_HUMAN	NDST1	0.0561	-0.0643	0.00534	-0.0184	-0.0528	-0.0749	-0.103	0.311	0.00528	-0.0465	0.11	-0.162	0.000765	0.0179	0.057	-0.0695	0.166	-0.105	0.0811	0.00109	0.0334	-0.0543	-0.13	-0.165	0.0504	-0.0504	0.0128	0.00674	0.024	0.126
NDUB1_HUMAN	NDUFB1	-0.23	-0.0887	-0.112	0.248	-0.0399	0.0982	-0.02	0.078	-0.0788	-0.341	0.126	-0.519	0.152	-0.0156	-0.21	0.129	-0.1	-0.0371	0.127	0.225	-0.3	-0.261	0.0504	-0.236	0.0414	0.31	0.00807	0.131	0.238	-0.105
NEC1_HUMAN	PCSK1	-0.0462	0.167	-0.125	0.36	0.0898	0.367	-0.0864	-0.0971	0.189	-0.285	0.0432	0.147	0.66	0.138	-0.0608	0.0607	-0.304	-0.0548	0.0905	-0.159	-0.0545	-0.176	-0.324	-0.186	-0.229	0.511	-0.0594	-0.315	0.27	0.0525
NEC2_HUMAN	PCSK2	0.0766	-0.0191	-0.0348	0.241	0.0925	0.127	-0.327	-0.117	-0.155	0.227	0.0438	0.0324	0.43	-0.194	-0.0382	-0.0838	-0.0371	0.0485	0.0837	-0.15	-0.239	-0.114	-0.0145	0.117	-0.37	0.34	0.0828	-0.13	0.188	-0.068
NECT1_HUMAN	NECTIN1	-0.0414	0.0536	-0.273	0.12	-0.056	0.225	0.000667	-0.0633	0.0147	-0.109	0.0598	0.0313	0.161	0.0013	-0.111	0.0471	0.258	-0.004	-0.176	-0.0982	-0.0562	-0.0408	0.0503	-0.183	-0.2	0.141	0.0363	-0.0374	0.0669	-0.0653
NECT2_HUMAN	NECTIN2	0.141	0.123	0.0765	-0.207	-0.0628	0.102	-0.0789	-0.154	0.168	-0.0908	-0.0808	0.0518	-0.057	-0.0668	0.0188	0.0475	-0.214	0.259	0.0735	0.00206	0.264	0.234	0.0703	-0.16	0.293	-0.0797	-0.0629	-0.00232	-0.218	0.0288
NEDD8_HUMAN	NEDD8	-0.0441	-0.125	-0.136	0.297	0.0104	0.117	-0.0142	0.395	-0.0522	0.218	0.00358	-0.294	0.214	0.249	0.136	-0.189	-0.164	-0.0891	0.144	0.209	-0.0505	-0.11	-0.044	0.124	-0.0779	0.337	0.0754	0.0066	0.097	-0.15
NEGR1_HUMAN	NEGR1	-0.0104	0.068	0.0438	-0.0206	-0.0293	0.255	-0.125	-0.0691	0.0912	-0.0235	0.0173	-0.00548	0.199	-0.0374	0.0801	-0.0596	0.239	0.0845	0.0307	-0.203	-0.265	-0.0695	0.0435	-0.115	-0.33	0.155	0.0177	0.00542	0.15	0.0215
NELL1_HUMAN	NELL1	-0.0297	0.116	-0.36	0.364	-0.0604	0.212	-0.201	-0.165	0.0512	-0.618	0.268	-0.218	0.335	-0.0249	-0.0718	0.225	0.0905	-0.303	-0.0276	0.00502	-0.231	-0.0585	0.021	-0.133	-0.52	0.338	-0.17	0.0219	0.317	-0.00086
NELL2_HUMAN	NELL2	0.123	0.303	-0.305	0.11	-0.0128	0.224	-0.349	-0.0889	-0.0187	-0.484	-0.014	-0.231	0.351	-0.14	-0.124	0.262	0.00181	0.146	0.027	-0.119	-0.52	-0.0107	-0.0585	-0.145	-0.521	0.381	0.0248	0.0224	0.155	0.0804
NENF_HUMAN	NENF	-0.126	0.0428	-0.133	0.0774	-0.0652	-0.199	0.102	0.0351	-0.147	-0.201	0.115	-0.272	-0.0968	0.0991	-0.0538	-0.182	0.153	-0.0673	0.0353	0.0892	-0.00987	-0.115	0.0835	-0.155	0.106	0.0354	-0.139	0.0539	0.0673	0.0296
NEO1_HUMAN	NEO1	-0.0225	0.0737	-0.00576	0.117	-0.036	0.0205	-0.0951	0.0793	0.00892	-0.175	0.0216	-0.165	0.0943	0.159	0.0239	-0.0518	0.151	-0.0618	0.114	-0.0202	-0.227	-0.134	0.0817	-0.0891	-0.164	0.122	0.0245	0.00187	0.192	-0.014
NETO1_HUMAN	NETO1	-0.064	-0.0575	-0.316	0.131	0.0459	0.0699	0.0192	0.177	-0.0888	0.61	0.233	0.0931	0.121	0.0488	-0.127	0.421	-0.172	-0.0796	-0.0293	-0.36	0.302	-0.106	-0.326	-0.0802	0.0574	0.103	0.0137	-0.206	0.0922	0.0334
NETO2_HUMAN	NETO2	-0.0216	0.239	-0.171	-0.023	-0.142	0.34	-0.535	-0.276	-0.359	0.182	0.151	-0.326	0.339	-0.0348	-0.00139	0.131	-0.361	0.137	0.101	0.162	-0.409	-0.032	0.0458	-0.177	-0.341	0.44	-0.17	-0.133	0.194	0.309
NEU1_HUMAN	OXT	0.148	0.235	0.409	-0.409	-0.0144	0.0744	0.049	-0.414	0.104	-0.214	0.145	0.199	0.168	-0.0865	-0.0444	0.0311	-0.353	-0.433	-0.0416	0.0983	-0.0763	0.503	-0.167	-0.185	-0.253	0.0171	-0.2	0.115	-0.502	0.173
NEU2_HUMAN	AVP	0.638	-0.0624	-0.247	0.288	0.0539	-0.11	-0.0407	0.101	0.3	0.477	-0.173	-0.512	0.179	-0.0693	-0.484	0.489	-0.746	0.0571	0.0509	0.182	-0.159	0.129	-0.286	0.846	-0.0165	0.00529	-0.138	-0.0123	-0.282	0.221
NEUG_HUMAN	NRGN	0.389	0.238	-0.288	0.295	-0.0297	0.585	-0.28	-0.113	-0.078	-0.171	-0.0379	0.295	0.0385	0.166	-0.123	0.486	-0.417	0.141	-0.0922	-0.121	-0.22	0.183	0.212	-0.0319	-0.466	0.512	0.183	-0.0228	0.0707	0.189
NEUM_HUMAN	GAP43	0.0541	-0.1	-0.449	0.341	-0.144	0.136	0.00245	0.227	0.0557	0.054	0.0661	-0.199	0.445	0.459	-0.00536	0.0366	-0.389	-0.0699	0.198	0.355	0.0646	-0.122	-0.0721	-0.123	-0.0148	0.514	-0.0208	-0.13	0.452	-0.076
NEUR1_HUMAN	NEU1	0.0973	-0.0426	0.331	-0.282	0.0247	0.469	0.289	-0.478	0.073	-0.236	0.158	0.414	-0.0164	-0.305	0.0933	-0.269	0.0598	-0.134	-0.225	-0.236	0.25	0.248	0.119	-0.221	0.0776	-0.252	-0.00424	-0.297	-0.462	0.215
NEUS_HUMAN	SERPINI1	0.104	0.0239	-0.0541	0.189	-0.023	0.296	-0.273	-0.167	-0.0154	0.174	-0.0788	0.229	0.281	-0.144	0.189	0.15	-0.0868	-0.142	-0.0683	-0.241	-0.284	-0.0971	0.117	-0.11	-0.373	0.398	0.116	0.048	0.112	-0.161
NEUT_HUMAN	NTS	-0.197	0.00538	-0.0024	-0.0983	0.225	0.122	-0.182	0.13	-0.0516	0.853	0.356	-0.117	0.0273	0.649	-0.0646	-0.0964	0.16	-0.448	0.125	0.232	-0.171	-0.0204	-0.064	-0.402	0.21	-0.116	-0.315	0.0223	0.139	-0.205
NFASC_HUMAN	NFASC	-0.00652	0.0845	-0.114	0.119	-0.136	0.0917	-0.0947	-0.00807	-0.0267	-0.224	0.00777	-0.149	0.178	0.0472	0.0988	-0.0586	0.213	-0.0187	0.0472	-0.0762	-0.222	-0.0257	0.0129	-0.0748	-0.29	0.237	0.0526	0.0145	0.0949	0.00229
NGAL_HUMAN	LCN2	0.115	-0.19	-0.747	0.313	0.423	-0.0138	0.581	0.115	-0.192	0.394	0.16	-0.177	-0.639	0.0401	-0.453	0.164	-0.244	-0.302	0.313	0.389	0.542	-0.212	0.0737	-0.0743	0.648	-0.029	-0.358	-0.0522	0.252	-0.154
NHLC3_HUMAN	NHLRC3	0.27	0.32	0.411	-0.0544	0.16	0.321	0.38	0.273	-0.218	0.321	0.157	0.108	0.0514	0.107	-0.0341	0.061	0.298	0.0172	0.139	-0.345	0.0709	-0.0362	-0.0902	-0.101	0.134	0.352	0.24	0.107	0.0386	0.00884
NHRF1_HUMAN	SLC9A3R1	0.177	-0.165	0.457	-0.238	-0.0398	-0.00874	0.349	-0.054	0.0349	-0.0115	-0.0897	0.00493	0.0371	-0.313	0.299	-0.247	0.17	0.245	-0.0212	-0.143	0.0964	0.137	0.34	0.0956	0.17	-0.315	-0.0431	0.137	-0.373	0.336
NICA_HUMAN	NCSTN	0.0134	-0.037	0.0822	-0.155	-0.1	-0.461	0.178	0.146	0.144	0.302	0.194	-0.043	0.0284	0.0875	0.189	-0.0454	0.243	-0.448	-0.0409	-0.101	0.196	-0.325	0.0134	-0.105	-0.203	0.0504	-0.043	-0.149	0.308	-0.308
NID1_HUMAN	NID1	-0.156	0.0211	0.0494	0.0898	-0.259	-0.121	0.209	-0.192	-0.106	0.197	0.0914	-0.0889	-0.153	-0.108	0.289	0.133	-0.246	0.0502	-0.12	0.00647	0.0891	0.0402	0.0236	0.0253	0.312	-0.224	-0.0923	-0.0318	-0.243	0.218
NID2_HUMAN	NID2	0.103	0.179	0.0596	-0.311	-0.0836	-0.127	0.141	-0.178	-0.026	-0.127	0.00948	0.391	-0.166	0.018	0.155	-0.17	-0.294	0.0495	-0.133	-0.125	0.257	0.244	0.0262	0.0172	0.128	-0.392	-0.0827	0.044	-0.259	0.154
NIF3L_HUMAN	NIF3L1	0.0828	-0.0823	0.156	-0.215	-0.122	0.135	-0.343	-0.0546	0.0492	0.322	0.167	-0.143	-0.0486	-0.154	-0.0541	0.175	-0.205	0.0571	0.111	0.237	-0.362	0.0266	-0.168	0.313	-0.0884	-0.0555	-0.0972	0.133	-0.0111	0.0803
NLGN1_HUMAN	NLGN1	0.0861	0.0247	-0.136	0.167	-0.102	-0.0102	0.00697	0.0739	-0.0594	0.242	-0.0394	-0.2	0.0804	0.132	0.0632	-0.116	0.271	-0.0961	0.173	-0.17	-0.079	-0.111	0.00745	0.179	-0.115	0.132	-0.00872	-0.112	0.287	-0.00353
NLGN2_HUMAN	NLGN2	0.0853	0.0462	-0.172	0.0699	-0.0248	0.0771	-0.0667	-0.196	0.0207	-0.235	-0.0406	-0.0521	0.0921	-0.0798	0.0911	-0.08	0.0117	0.191	0.143	-0.239	-0.164	-0.137	0.054	-0.204	-0.267	0.0725	0.0522	0.00623	0.202	-0.0558
NLGN3_HUMAN	NLGN3	0.0549	-4.43e-05	-0.138	0.194	-0.128	-0.106	0.0966	0.0033	-0.0881	0.0681	0.207	-0.00544	0.222	0.0281	0.0663	-0.131	0.143	0.153	0.267	-0.241	-0.0259	-0.0652	0.192	-0.238	-0.212	0.129	0.235	-0.026	0.366	-0.112
NLGNX_HUMAN	NLGN4X	0.133	-0.116	-0.208	0.153	-0.00646	-0.22	0.154	-0.0937	-0.177	0.382	0.101	-0.419	0.121	0.289	0.0396	-0.104	0.286	-0.0175	0.383	-0.261	-0.16	-0.332	0.118	-0.0558	-0.157	0.269	0.206	-0.016	0.629	-0.38
NNRD_HUMAN	NAXD	0.0222	-0.0747	0.0286	-0.0208	-0.0476	0.151	-0.277	0.198	-0.0649	0.367	-0.144	0.199	-0.044	0.0915	0.196	0.252	-0.135	0.238	0.0819	0.272	0.341	0.0504	-0.138	0.383	0.153	-0.117	-0.184	-0.241	-0.128	0.0409
NNRE_HUMAN	NAXE	0.0217	0.145	-0.0463	-0.0233	-0.0959	0.134	-0.226	0.106	-0.0223	-0.179	0.0976	-0.0814	0.257	0.0221	-0.138	0.0578	-0.063	-0.0545	0.0366	0.199	-0.222	0.0404	-0.105	-0.135	-0.0948	0.0349	-0.0502	0.0813	0.208	0.134
NOE1_HUMAN	OLFM1	0.0854	-0.00924	-0.104	0.0396	-0.0627	0.233	0.0253	-0.0623	-0.0542	0.307	-0.0158	0.0277	0.17	-0.0371	-0.0721	0.278	0.0225	-0.198	0.0672	-0.157	-0.17	-0.0264	0.0114	-0.0909	-0.256	0.427	0.0736	-0.0524	0.0872	0.0304
NOE2_HUMAN	OLFM2	0.0611	0.0818	-0.368	0.0433	-0.271	-0.0482	0.0439	0.0169	-0.14	-0.1	0.16	-0.187	0.17	-0.0639	-0.191	-0.0223	-0.0993	-0.21	0.0387	0.123	0.0976	0.0225	0.00843	-0.0476	0.118	0.0194	-0.127	0.0545	0.214	-0.148
NOMO2_HUMAN	NOMO2	-0.0516	-0.0102	0.0954	-0.162	0.093	-0.134	-0.167	0.0541	0.127	0.439	-0.0541	0.0405	-0.116	-0.157	0.0166	0.142	0.312	0.151	-0.111	-0.101	-0.0394	0.0791	-0.0585	0.0395	-0.0474	0.0188	0.0993	0.166	-0.313	-0.0408
NOV_HUMAN		0.137	0.0488	0.149	-0.549	-0.183	-0.347	0.111	-0.621	0.277	-0.221	-0.0277	0.0502	-0.267	-0.366	0.272	0.116	0.34	0.371	-0.118	-0.349	-0.0439	0.721	0.0619	-0.396	-0.26	-0.28	0.0584	0.0679	-0.528	-0.139
NPC2_HUMAN	NPC2	0.00997	0.125	-0.0997	0.0948	-0.0502	-0.526	0.0173	0.102	-0.048	-0.495	-0.073	-0.462	0.155	0.324	0.0404	-0.209	0.0805	-0.308	-0.0146	0.141	-0.442	-0.0757	0.0367	-0.406	0.0601	0.0874	-0.298	0.12	0.151	0.0199
NPDC1_HUMAN	NPDC1	-0.126	0.284	-0.273	0.243	0.00498	0.0654	-0.178	0.137	-0.105	-0.013	0.0454	-0.0498	0.286	-0.128	-0.317	0.294	-0.105	0.083	-0.0317	0.074	-0.294	-0.157	-0.0349	0.0178	-0.242	0.201	0.145	0.0959	0.0595	0.0654
NPNT_HUMAN	NPNT	-0.0537	-0.0315	-0.206	-0.112	0.12	-0.0589	0.28	-0.014	0.12	-0.3	-0.126	-0.154	-0.177	-0.259	0.0588	-0.0876	-0.38	-0.107	-0.277	0.0839	0.0756	0.329	0.0403	-0.185	-0.1	-0.0647	-0.0515	0.0149	-0.0277	0.13
NPTN_HUMAN	NPTN	-0.0334	0.0267	0.000771	-0.0349	-0.0425	0.221	-0.226	-0.222	0.0425	-0.119	-0.11	-0.0166	0.203	-0.0229	-0.169	0.0115	0.144	-0.00531	0.054	-0.0133	-0.205	0.076	-0.0211	-0.199	-0.17	0.246	0.0192	0.00116	0.122	-0.0651
NPTX1_HUMAN	NPTX1	0.135	0.126	-0.214	0.139	-0.0638	0.0918	-0.427	-0.162	-0.176	0.0374	0.143	-0.359	0.281	0.0339	-0.0681	-0.00743	0.247	-0.0769	0.105	-0.242	-0.337	-0.231	0.019	-0.104	-0.398	0.381	0.106	0.00683	0.197	-0.115
NPTX2_HUMAN	NPTX2	0.294	0.193	-0.403	0.302	0.0482	0.284	-0.395	-0.448	-0.132	-0.374	0.142	-0.0841	0.55	-0.334	-0.151	0.404	-0.0118	-0.112	0.0351	-0.287	-0.533	-0.117	-0.0727	-0.0791	-0.828	0.619	0.21	-0.131	0.237	-0.027
NPTXR_HUMAN	NPTXR	0.137	0.143	-0.408	0.467	0.0742	0.112	-0.322	-0.0599	-0.0851	-0.111	0.28	-0.206	0.5	0.0328	-0.208	0.151	-0.0773	-0.186	0.179	-0.121	-0.357	-0.163	0.0141	-0.143	-0.625	0.594	0.205	0.051	0.354	0.00683
NPW_HUMAN	NPW	-0.0666	0.0346	-0.33	-0.0988	-0.0131	-0.512	0.34	0.201	0.473	-0.0848	-0.629	-0.311	0.0867	-0.19	0.266	-0.213	0.15	0.299	-0.409	0.196	-0.256	-0.336	0.234	-0.232	-0.467	-0.112	0.197	0.393	-0.523	-0.345
NPY_HUMAN	NPY	0.144	0.32	-0.018	0.362	-0.0148	0.535	-0.525	0.102	0.0296	-0.368	-0.0346	0.372	-0.163	-0.452	0.219	0.26	-0.0983	0.71	-0.0939	-0.0786	-0.528	0.336	-0.0536	0.365	-0.36	0.556	0.00217	-0.0341	0.0251	0.0756
NQO2_HUMAN	NQO2	-0.285	-0.323	0.189	-0.232	0.202	-0.104	-0.405	0.0564	-0.963	0.728	0.402	-0.158	-0.452	-0.134	-0.866	-0.0122	-0.32	0.135	0.445	0.604	0.461	-0.073	-0.843	0.492	0.528	0.2	0.185	-0.0893	-0.579	-0.0396
NR3L1_HUMAN	NCR3LG1	-0.527	-0.643	-0.617	-0.219	-0.971	-0.316	0.318	0.0941	-0.392	1.39	-0.00824	0.143	-0.655	-0.164	-0.277	0.204	-0.474	0.126	0.431	0.469	-0.516	0.127	0.318	-0.58	0.131	-0.137	-0.136	-0.0393	0.241	0.00469
NRCAM_HUMAN	NRCAM	-0.000291	0.0761	-0.192	0.0842	-0.129	0.266	-0.394	-0.213	0.0834	-0.332	-0.0874	-0.166	0.275	0.0954	-0.122	-0.0181	0.0324	0.0729	0.0639	-0.14	-0.407	-0.15	-0.0282	-0.21	-0.392	0.253	0.00496	-0.00907	0.0999	0.113
NRN1_HUMAN	NRN1	0.0166	0.0184	-0.477	0.58	0.0492	-0.346	0.125	0.29	-0.281	-0.26	0.181	-0.578	0.262	0.353	0.0106	-0.145	-0.0553	-0.348	0.336	0.35	-0.456	-0.535	0.0245	-0.357	-0.147	0.37	-0.00686	0.163	0.314	0.0144
NRP1_HUMAN	NRP1	-0.0142	0.221	0.13	-0.0916	-0.0376	0.036	0.0228	-0.146	-0.00119	-0.32	-0.183	0.217	0.0277	-0.0619	-0.13	0.167	-0.0216	0.00446	-0.111	0.0393	-0.0502	0.107	0.0696	-0.122	-0.00983	0.0414	-0.0199	0.161	-0.253	0.12
NRP2_HUMAN	NRP2	0.0455	0.197	0.0179	-0.0628	-0.14	0.00417	-0.033	-0.112	0.0281	-0.164	0.134	-0.00143	-0.0457	0.0697	-0.104	-0.0837	0.0558	0.099	-0.0794	0.0383	0.197	0.0918	-0.0134	-0.168	-0.217	0.0332	0.0411	0.0532	-0.096	0.0958
NRX1A_HUMAN	NRXN1	0.0259	0.0952	-0.128	0.184	-0.124	0.113	-0.236	-0.0323	-0.104	0.0289	0.0665	-0.0971	0.0749	0.0298	-0.0569	0.0441	0.138	0.0917	0.175	-0.318	-0.218	-0.183	0.011	-0.0115	-0.215	0.267	0.0816	-0.0163	0.253	-0.0813
NRX1B_HUMAN	NRXN1	0.0994	-0.0364	-0.562	0.315	-0.383	-0.0305	-0.114	0.068	0.0799	-0.197	-0.267	-0.0494	0.393	0.0975	0.172	0.158	-0.173	-0.124	0.329	-0.405	-0.246	-0.191	0.228	0.147	-0.608	0.329	0.0872	-0.378	0.272	-0.219
NRX2A_HUMAN	NRXN2	-0.0679	0.0856	-0.123	0.0948	-0.0817	-0.0524	-0.183	0.123	-0.206	0.355	0.0589	-0.253	0.0156	0.106	-0.161	0.0724	0.077	0.0844	0.147	-0.202	-0.248	-0.143	-0.011	0.164	-0.169	0.211	0.029	-0.0685	0.243	-0.0671
NRX2B_HUMAN	NRXN2	-0.309	0.0216	0.000188	0.246	-0.215	-0.039	0.00392	0.0207	-0.316	-0.589	0.0884	-0.42	-0.0651	0.439	-0.014	0.0518	0.0163	0.157	0.513	0.0518	-0.375	-0.274	0.175	-0.108	-0.266	0.444	-0.048	-0.00307	0.546	0.0481
NRX3A_HUMAN	NRXN3	0.0518	0.0186	-0.207	0.115	-0.0122	0.138	-0.118	-0.0702	-0.036	-0.00134	0.0652	-0.0698	0.189	-0.0121	-0.0179	0.0743	0.0453	-0.119	0.0444	-0.24	-0.24	-0.109	-0.0265	0.0279	-0.248	0.205	0.0597	-0.0329	0.121	-0.0483
NRX3B_HUMAN	NRXN3	0.00254	-0.258	0.0538	0.162	-0.0583	-0.279	0.269	-0.0537	-0.345	0.0665	0.277	-0.259	-0.417	0.24	0.0243	-0.359	0.156	-0.154	0.312	-0.0278	0.0258	-0.354	0.0561	-0.0286	0.355	-0.142	-0.132	0.0609	0.3	-0.0481
NSF_HUMAN	NSF	-0.0104	-0.0251	-0.344	0.342	-0.0969	-0.0511	-0.00682	0.267	0.0435	0.26	0.0506	-0.161	0.0451	0.157	-0.309	-0.0981	-0.186	-0.0849	0.157	0.377	0.11	0.198	-0.18	0.16	0.352	-0.181	-0.0623	-0.0749	0.141	-0.0548
NSF1C_HUMAN	NSFL1C	-0.191	-0.354	-0.17	0.00319	0.0413	-0.0861	-0.237	0.534	-0.35	1.13	0.179	-0.189	0.182	-0.078	0.115	0.522	-0.165	-0.402	-0.149	0.254	0.101	-0.133	-0.0507	0.885	0.122	-0.158	0.222	-0.101	-0.052	0.042
NSG1_HUMAN	NSG1	0.117	0.0945	0.69	-0.277	0.233	0.201	0.236	-0.383	0.21	-0.262	0.0691	-0.221	-0.0425	-0.114	0.0531	-0.509	0.133	0.549	0.202	0.0219	-0.389	-0.189	-0.043	-0.0542	-0.0475	-0.102	0.0393	0.173	-0.272	0.239
NSG2_HUMAN	NSG2	-0.479	-0.0777	0.305	-0.199	0.191	0.506	0.286	0.0847	-0.338	0.479	-0.412	0.0614	-0.495	-0.611	-0.495	1.3	-0.918	-0.374	-0.503	-0.47	-0.457	-0.437	-0.0639	1.33	-0.449	0.0289	0.0809	-0.177	0.0585	-0.157
NTF2_HUMAN	NUTF2	0.207	0.38	0.628	-0.726	0.0708	0.601	-0.484	-0.299	0.247	-0.126	-0.102	0.436	0.448	-0.572	-0.239	0.417	-0.121	0.459	-0.193	-0.111	-0.528	0.539	-0.305	0.181	-0.367	-0.138	0.238	0.0325	-0.668	0.161
NTNG1_HUMAN	NTNG1	0.0834	0.0733	-0.331	0.0543	-0.159	-0.165	-0.108	-0.0826	-0.0988	0.126	0.202	-0.183	0.222	0.15	0.0614	0.0967	0.16	-0.171	-0.0425	-0.234	-0.276	-0.062	0.0182	-0.209	-0.21	0.304	0.206	0.0207	0.0905	-0.0487
NTNG2_HUMAN	NTNG2	0.152	0.0358	-0.66	0.331	-0.0499	0.048	0.00334	0.108	0.0496	0.216	0.044	-0.122	0.0788	-0.136	0.103	0.34	-0.0418	-0.204	0.0924	-0.447	-0.24	-0.19	0.00553	-0.088	-0.236	0.273	-0.00368	-0.0309	0.312	-0.213
NTRI_HUMAN	NTM	-0.00394	0.116	0.131	0.0018	-0.0942	0.261	-0.126	-0.16	0.0253	-0.174	-0.0942	-0.314	0.22	0.0479	-0.0848	-0.163	0.115	0.187	0.101	0.0727	-0.387	0.0317	0.0263	-0.147	-0.298	0.109	-0.0913	0.0337	0.172	0.093
NTRK2_HUMAN	NTRK2	0.183	0.161	0.154	-0.135	-0.0434	0.328	-0.212	-0.315	0.18	-0.56	-0.256	0.0552	0.157	-0.0557	-0.0676	0.0406	0.0837	0.337	-0.265	-0.117	-0.289	-1.7e-05	-0.0845	-0.26	-0.461	0.237	0.0703	0.139	0.243	-0.102
NTRK3_HUMAN	NTRK3	-0.00892	0.0964	0.188	-0.252	-0.0215	0.415	-0.194	-0.334	0.0861	-0.519	-0.225	0.156	0.0962	-0.305	-0.111	0.145	-0.0565	0.132	-0.0251	-0.236	-0.344	0.171	-0.187	-0.248	-0.471	0.125	0.0451	-0.17	-0.0793	0.111
NUCB1_HUMAN	NUCB1	0.0788	0.0973	0.39	-0.152	-0.00853	-0.0649	0.0363	-0.0984	-0.0255	-0.00183	0.567	0.00941	0.0318	-0.00596	-0.0232	0.000698	-0.173	0.0859	0.0509	-0.0713	0.0503	0.308	0.0214	-0.11	-0.000776	0.0387	-0.0954	0.0166	-0.00727	-0.0559
NUCB2_HUMAN	NUCB2	-0.135	0.124	-0.00155	-0.307	0.108	-0.126	-0.0297	0.0788	-0.0123	-0.0187	0.142	-0.0722	0.409	0.141	-0.131	0.0894	0.0912	0.14	0.0949	-0.159	0.257	-0.144	-0.108	-0.222	-0.0488	0.172	0.0716	-0.0304	0.00629	0.153
NUDC_HUMAN	NUDC	-0.205	0.0035	-0.283	0.0911	-0.056	0.139	0.167	0.169	-0.352	0.311	-0.121	-0.581	-0.228	-0.00205	-0.354	0.456	-0.295	-0.51	-0.0296	-0.0764	-0.461	-0.119	-0.0557	0.135	0.12	0.0265	-0.284	0.143	0.295	-0.0137
NUDT3_HUMAN	NUDT3	0.0965	0.14	0.0524	-0.0876	-0.0351	0.393	-0.00353	-0.12	0.156	-0.0527	-0.211	0.0501	0.184	-0.048	-0.0041	0.0526	-0.072	0.0428	0.0541	0.138	-0.0659	0.251	0.208	0.0723	-0.17	0.027	0.132	-0.112	0.104	0.154
NUDT5_HUMAN	NUDT5	0.00815	0.0576	-0.0826	-0.0941	-0.0146	-0.077	-0.167	0.517	0.0541	0.41	-0.206	-0.00872	0.238	0.03	0.113	0.24	0.000835	0.159	-0.0338	-0.207	0.029	-0.174	-0.00533	0.0241	-0.0857	0.133	-0.0323	0.0741	0.231	-0.171
NUDT9_HUMAN	NUDT9	-0.0956	-0.137	0.151	-0.221	0.0275	0.0643	0.475	-0.355	0.0131	-0.635	-0.542	-0.00752	0.285	0.153	-0.0769	-0.153	-0.148	0.0717	-0.161	-0.221	0.322	0.0269	-0.113	-0.0989	0.0411	0.0142	-0.0446	-0.0229	-0.276	0.0371
NXPH1_HUMAN	NXPH1	0.0015	0.0667	0.298	0.0801	-0.0532	-0.191	-0.25	-0.0633	-0.0763	-0.101	0.0257	-0.037	0.122	-0.148	-0.159	0.0878	-0.217	0.0446	-0.0043	0.144	-0.321	-0.146	0.115	-0.117	-0.121	0.123	0.0475	0.00451	0.083	0.148
NXPH3_HUMAN	NXPH3	0.0687	-0.0624	-0.122	0.0611	0.0499	-0.103	0.0393	0.0815	-0.153	-0.185	0.102	-0.209	-0.158	-0.0903	0.0839	0.00969	0.064	0.263	0.255	-0.223	-0.211	-0.299	0.212	-0.0202	0.0025	0.196	0.275	0.0221	0.195	0.0347
NXPH4_HUMAN	NXPH4	-0.0556	-0.164	0.047	0.137	-0.131	-0.179	-0.211	0.342	0.146	-0.138	0.149	-0.38	-0.181	-0.0671	-0.411	-0.273	-0.286	0.278	0.188	0.21	0.11	-0.331	0.00556	-0.0396	0.115	-0.171	0.0659	-0.0342	0.00268	0.0642
OAF_HUMAN	OAF	-0.0584	0.0141	-0.148	0.215	0.0787	-0.119	0.233	-0.0916	0.126	-0.314	0.129	-0.0641	-0.0152	0.137	-0.249	0.00146	-0.0627	-0.241	0.0925	-0.0187	0.252	-0.0865	0.0531	-0.325	0.0838	0.17	0.00486	0.0365	0.167	0.223
OBP2A_HUMAN	OBP2A	-1.06	1.36	1.96	1.24	-0.808	-0.287	-0.00742	1.72	-0.87	1.14	1.19	0.826	-0.755	1.04	-1.05	1.85	-0.526	1.43	-0.93	-0.461	0.648	-0.922	-0.873	1.16	-0.0659	2.75	1.47	-0.228	-1.6	-0.748
OFUT2_HUMAN	POFUT2	-0.335	-0.0493	0.0547	-0.365	0.106	0.371	-0.199	0.0899	-0.219	0.0117	-0.0678	-0.252	-0.0541	0.18	0.377	-0.0605	0.43	-0.277	0.0627	-0.0501	0.408	-0.00879	0.0652	0.115	0.409	0.062	0.394	-0.47	-0.296	-0.211
OGFD3_HUMAN	OGFOD3	-0.179	0.027	-0.161	-0.0415	0.127	0.0302	0.0321	0.195	-0.0905	0.333	0.0233	-0.00998	-0.0109	-0.124	0.0195	-0.0114	0.237	0.161	0.0352	-0.183	0.185	0.28	-0.0798	-0.137	-0.0294	0.0732	0.153	-0.0613	-0.00403	-0.0717
OLFL1_HUMAN	OLFML1	0.0534	-0.158	0.167	-0.00939	-0.214	-0.101	0.259	0.0572	0.273	0.00952	0.104	0.0247	0.0153	0.251	0.121	0.0111	-0.0269	-0.275	-0.0535	0.00954	0.24	0.305	0.068	-0.0963	0.054	-0.0301	0.11	-0.0801	-0.168	0.0784
OLFL3_HUMAN	OLFML3	0.191	0.0307	0.103	-0.24	-0.203	-0.104	0.0519	-0.242	0.123	-0.169	0.0496	-0.0434	0.0373	-0.232	-0.0502	-0.0159	-0.175	0.238	0.147	-0.011	-0.282	0.284	0.237	-0.191	-0.0111	-0.0103	0.0494	-0.0588	-0.0818	0.211
OLM2A_HUMAN	OLFML2A	0.00825	-0.00122	0.0892	-0.0749	0.00596	-0.218	-0.189	-0.0261	0.387	-0.452	-0.348	0.0927	0.0881	-0.0308	-0.0891	0.131	0.211	0.106	-0.0877	-0.0276	-0.045	0.311	-0.00224	-0.204	0.122	-0.175	0.0424	-0.000148	0.151	-0.0401
OLM2B_HUMAN	OLFML2B	-0.0417	0.118	-0.131	-0.401	-0.176	-0.362	-0.0227	0.0018	0.15	-0.14	-0.0936	0.177	0.223	0.0151	-0.0417	0.0377	0.155	0.237	-0.33	-0.387	-0.164	0.284	0.292	-0.176	0.122	-0.0172	0.133	-0.0713	-0.188	-0.0373
OLR1_HUMAN	OLR1	0.896	-0.157	-0.288	0.455	0.221	-0.023	-0.101	-0.0202	0.516	0.101	0.407	-0.273	0.0302	0.407	-0.0632	0.235	-0.0508	-0.165	0.252	-0.292	-0.119	0.148	-0.00901	0.76	-0.255	-0.0634	0.153	-0.0574	-0.0723	0.109
OMD_HUMAN	OMD	-0.0184	0.00993	-0.159	-0.0766	-0.309	-0.571	0.253	0.0528	0.0324	0.0012	-0.25	0.0176	-0.0221	-0.0424	-0.023	-0.174	0.0523	0.145	0.0782	0.161	0.147	0.145	0.309	-0.0934	-0.247	0.0783	0.128	-0.15	0.102	-0.153
OMGP_HUMAN	OMG	0.213	0.18	0.0059	0.0705	0.00929	-0.132	0.111	-0.204	0.205	-0.32	-0.0417	-0.0472	0.0973	0.155	0.246	0.00766	0.431	-0.144	-0.254	-0.209	-0.174	0.0361	0.00615	-0.274	-0.364	0.255	0.0105	0.164	0.0385	0.0228
OPALI_HUMAN	OPALIN	-0.305	-0.149	-0.206	0.0735	-0.0554	0.133	-0.122	0.134	0.136	-0.243	-0.177	-0.0763	0.375	0.193	-0.239	0.0509	0.0109	-0.096	0.126	0.27	0.0833	-0.0242	-0.0808	0.389	-0.231	0.106	0.0213	-0.0258	-0.0348	-0.0192
OPCM_HUMAN	OPCML	-0.0595	0.205	-0.111	0.14	-0.0111	0.238	-0.187	-0.0811	0.161	-0.34	-0.0772	-0.0939	0.349	0.022	-0.184	-0.0569	0.017	-0.00572	0.0331	-0.0303	-0.379	-0.0802	0.0638	-0.322	-0.316	0.169	0.00583	0.0361	0.141	0.018
ORN_HUMAN	REXO2	-0.118	0.14	-0.294	0.153	-0.112	-0.226	0.00551	0.287	-0.296	0.695	0.206	0.233	0.226	0.119	-0.112	0.252	0.149	-0.311	-0.039	-0.227	-0.323	0.096	-0.177	0.0694	-0.0556	0.128	-0.123	-0.0756	-0.152	0.262
OS9_HUMAN	OS9	0.0837	-0.221	0.238	-0.0399	0.0979	-0.0337	-0.431	0.363	-0.18	0.941	0.199	0.17	-0.114	-0.131	-0.467	0.437	0.322	0.0788	0.166	-0.074	-0.386	-0.21	-0.183	1.3	-0.111	0.119	0.0663	-0.251	-0.0658	-0.065
OSCAR_HUMAN	OSCAR	0.135	0.234	-0.135	0.0659	-0.0689	-0.341	0.0256	0.161	-0.0409	-0.279	0.215	-0.159	-0.114	0.292	-0.321	-0.266	0.365	0.454	-0.0372	-0.157	-0.0683	0.0415	0.11	0.125	0.273	-0.634	-0.123	0.171	0.147	0.185
OSTCN_HUMAN	BGLAP	-0.261	0.123	0.274	0.0893	-0.0469	-0.478	0.26	-0.225	0.0104	-0.754	-0.359	-0.593	-0.101	0.0667	0.231	-0.419	0.22	0.106	0.524	0.0364	0.285	-0.253	0.368	-0.00157	-0.00518	0.0703	-0.331	0.117	-0.303	-0.479
OSTM1_HUMAN	OSTM1	0.132	0.201	0.0559	-0.00209	0.0112	0.241	0.0641	-0.26	0.138	-0.356	0.0586	-0.211	0.316	0.0347	-0.2	0.133	-0.0915	0.0806	0.343	0.149	-0.125	0.0782	-0.175	-0.143	-0.348	0.0352	0.0279	0.0426	0.0259	0.0326
OSTN_HUMAN	OSTN	0.826	0.0279	-0.2	-0.772	-0.0804	-0.154	-0.0564	0.436	0.0134	1.22	0.371	NA	-0.0696	-0.0506	0.739	0.0312	-0.422	0.21	-0.79	-0.36	0.556	0.0409	NA	0.426	NA	-0.539	-0.201	NA	NA	-0.129
OSTP_HUMAN	SPP1	-0.0199	0.203	0.0909	0.0438	0.00231	0.12	-0.141	-0.145	0.0849	-0.368	-0.0744	0.0918	0.274	0.013	0.117	-0.291	0.197	0.017	-0.483	-0.0319	-0.161	-0.00432	0.221	0.0562	-0.334	-0.184	-0.13	-0.0163	-0.00939	0.0433
OTUB1_HUMAN	OTUB1	0.0345	-0.00617	-0.258	-0.141	-0.132	-0.407	0.111	0.52	-0.0409	0.723	-0.434	0.307	0.241	0.0277	0.355	0.17	-0.0625	0.109	-0.386	-0.0119	0.347	0.0569	-0.0414	0.599	0.0193	-0.229	-0.168	-0.085	-0.0966	0.107
OXR1_HUMAN	OXR1	-0.16	-0.194	-0.215	0.241	0.246	0.0553	-0.144	1	-0.139	1.16	0.372	-0.0257	0.533	-0.458	-0.0706	0.281	-0.175	0.116	0.154	0.0182	-0.189	0.0185	0.135	0.72	-0.298	0.21	0.104	0.00352	0.2	0.007
P3IP1_HUMAN	PIK3IP1	-0.182	-0.0606	0.251	0.0155	-0.0897	0.119	-0.00622	0.0371	0.0947	-0.363	-0.0435	-0.125	-0.117	0.122	0.129	-0.167	0.103	-0.0127	0.125	0.14	-0.0314	-0.0208	0.214	-0.315	-0.19	0.163	0.015	-0.056	-0.189	0.123
PA1B2_HUMAN	PAFAH1B2	-0.305	-0.107	0.369	0.0513	0.12	-0.584	-0.707	0.678	-0.524	1.05	-0.222	0.591	-0.274	0.281	0.322	0.15	-0.722	-0.0264	0.13	-0.189	0.0852	-0.521	0.13	0.962	0.343	-0.262	-0.332	-0.164	0.0272	-0.164
PA1B3_HUMAN	PAFAH1B3	0.0163	-0.322	0.239	0.113	0.527	0.0171	-0.0272	1.07	-0.103	1.81	0.00506	0.643	-0.242	-0.246	0.175	1.35	-0.115	-0.101	-0.0452	-0.0121	0.104	0.0271	-0.0529	1.78	0.243	0.0188	0.512	-0.111	-0.222	-0.0614
PACA_HUMAN	ADCYAP1	-0.142	-0.0161	-0.382	-0.213	0.396	-0.0696	-0.0606	0.158	-0.648	0.0293	-0.578	0.0307	0.14	0.253	-0.125	0.0879	-0.00124	0.407	0.231	0.0608	0.0106	-0.0935	-0.0968	-0.116	0.233	0.0276	-0.227	-0.186	0.303	0.146
PAG15_HUMAN	PLA2G15	0.0597	0.0755	-0.076	-0.0308	-0.136	-0.11	0.0431	0.0542	-0.132	0.105	0.141	-0.0311	0.128	-0.0425	0.109	-0.0199	0.042	-0.164	0.00195	-0.109	-0.0897	-0.0338	-0.000554	-0.184	-0.0406	0.0132	0.0414	0.0838	0.156	-0.171
PAI1_HUMAN	SERPINE1	-0.249	0.125	-0.272	-0.104	0.201	-0.568	0.0595	0.242	0.266	-0.113	-0.213	0.253	-0.397	-0.149	-0.18	0.503	0.0261	-0.134	-0.376	0.514	0.501	-0.193	0.0638	0.0151	0.487	-0.303	-0.0552	-0.432	0.355	-0.0511
PALM_HUMAN	PALM	-0.114	0.00816	-0.199	0.35	-0.249	0.0993	-0.378	0.0683	-0.0415	-0.256	0.0287	-0.0608	0.131	-0.0808	-0.0233	0.0755	-0.227	-0.386	0.2	0.105	-0.00432	-0.0377	0.00828	-0.335	-0.18	0.236	-0.03	-0.0076	0.0192	0.113
PAMR1_HUMAN	PAMR1	-0.118	0.0376	0.381	-0.178	0.0013	-0.14	-0.00815	-0.0117	0.0419	0.203	-0.0111	0.257	0.00587	-0.0444	0.0533	0.185	-0.159	-0.0191	-0.0911	0.0434	0.306	0.261	-0.0195	-0.338	0.11	-0.152	0.0153	0.0669	-0.18	0.211
PAPP2_HUMAN	PAPPA2	0.0163	-0.142	-0.191	0.0676	-0.158	-0.03	0.0212	0.0196	-0.115	0.302	-0.00283	-0.324	0.0662	0.0853	0.0173	0.0153	0.0822	-0.121	0.247	-0.0577	0.107	-0.0799	-0.0311	0.0434	0.311	-0.219	-0.0528	-0.17	0.108	-0.0957
PARK7_HUMAN	PARK7	0.0186	-0.0491	-0.0638	0.114	0.0994	-0.00516	-0.0521	0.333	-0.0503	0.567	-0.114	-0.273	0.0676	0.05	0.0061	0.192	-0.243	-0.00859	0.162	0.124	-0.142	-0.114	-0.179	0.456	-0.131	0.0104	-0.0373	-0.0149	0.136	-0.0348
PBIP1_HUMAN	PBXIP1	-0.181	0.0657	-0.169	0.197	-0.00793	-0.288	0.263	0.067	0.00386	-0.118	0.0617	-0.167	0.0839	0.0783	-0.214	-0.172	-0.204	-0.111	-0.0165	0.153	0.345	0.138	0.0675	-0.00679	0.139	-0.0954	0.0242	0.0111	-0.0705	-0.0123
PC4L1_HUMAN	PCP4L1	0.118	0.438	-0.144	0.15	-0.511	0.424	-0.203	-0.128	-0.0521	-0.282	-0.21	0.022	0.707	-0.278	-0.048	0.0971	0.232	0.00921	0.219	0.463	-0.275	-0.0271	-0.0783	-0.127	-0.762	0.123	0.127	0.0748	-0.0748	0.309
PCBP1_HUMAN	PCBP1	-0.543	-0.203	0.529	-0.508	0.604	0.204	-0.0468	0.157	-0.0401	0.643	0.0465	0.0402	-0.423	0.292	0.194	0.282	-0.496	-0.29	0.0943	-0.465	0.193	-0.0056	-0.4	0.841	0.452	-0.189	0.144	-0.0775	-0.106	-0.0581
PCD10_HUMAN	PCDH10	0.039	0.087	0.00172	-0.0354	-0.0287	0.184	-0.131	-0.121	0.138	-0.346	-0.0413	0.105	0.257	-0.0277	-0.184	0.0361	-0.234	-0.0347	0.0328	-0.0382	-0.184	0.0149	-0.115	-0.266	-0.244	0.132	0.0293	-0.0794	0.0378	0.0711
PCD12_HUMAN	PCDH12	0.123	0.187	0.0434	0.000835	-0.0148	-0.0708	0.0376	-0.309	-0.00719	0.156	-0.0708	0.0271	-0.167	-0.0372	-0.225	0.089	-0.0329	0.234	-0.113	0.076	-0.073	0.282	0.0154	-0.137	-0.0908	-0.111	-0.159	0.124	-0.0993	0.186
PCD16_HUMAN	DCHS1	0.0313	0.049	0.156	-0.109	-0.129	0.379	-0.0759	-0.108	0.00892	0.0379	-0.146	0.17	-0.134	0.279	0.278	-0.219	0.0945	0.0221	0.233	-0.172	0.192	0.102	0.000533	0.807	0.118	-0.0184	-0.0944	-0.111	-0.117	-0.0387
PCD17_HUMAN	PCDH17	0.0874	0.0458	-0.342	-0.022	-0.148	-0.0255	-0.109	-0.00459	0.0229	0.0121	0.0426	-0.145	0.00824	0.039	0.102	0.0619	0.264	0.0619	-0.0344	-0.143	-0.107	-0.161	-0.0486	0.0608	-0.419	0.153	0.0638	0.0361	0.144	0.0114
PCD19_HUMAN	PCDH19	-0.00332	0.15	-0.448	0.415	-0.0228	-0.0136	-0.179	0.116	-0.0428	-0.0433	0.304	-0.381	0.201	0.257	-0.13	-0.0687	-0.00157	-0.163	0.12	0.143	0.0291	-0.152	0.0778	-0.104	-0.145	0.331	0.0144	-0.0467	0.331	0.0111
PCDA6_HUMAN	PCDHA6	-0.00429	-0.0934	-0.0235	0.0187	0.0776	0.0163	-0.0408	0.0272	0.143	0.38	0.289	-0.153	0.064	0.251	0.0191	-0.0869	0.209	0.105	0.27	0.102	-0.0973	-0.0917	0.0314	0.245	-0.108	-0.0478	0.0509	0.0258	0.183	0.0517
PCDA7_HUMAN	PCDHA7	0.242	0.185	0.1	-0.208	0.118	0.349	0.42	0.0515	0.257	-0.261	0.0217	-0.513	0.167	-0.0772	0.362	-0.115	0.0247	0.321	0.0412	-0.0556	-0.0187	-0.376	0.355	0.124	-0.215	0.193	-0.224	-0.189	0.0438	0.0516
PCDAA_HUMAN	PCDHA10	0.0349	-0.44	-0.125	0.0406	-0.286	-0.806	0.158	0.313	0.261	0.87	0.194	-0.127	-0.115	0.672	-0.299	0.14	-0.101	-0.28	0.0483	-0.0967	-0.0383	-0.264	-0.446	0.413	-0.0816	0.143	0.26	-0.0221	-0.586	-0.325
PCDB5_HUMAN	PCDHB5	0.011	-0.249	0.43	-0.251	0.263	0.475	-0.16	-0.0518	0.277	0.111	0.194	0.218	-0.217	0.0702	-0.243	0.0148	-0.205	-0.0125	0.25	0.139	0.568	0.617	-0.0402	0.0317	0.0198	-0.312	0.172	0.00144	0.0536	-0.0544
PCDB9_HUMAN	PCDHB9	0.189	-0.0156	0.133	-0.0205	0.0966	-0.0551	-0.00404	-0.0563	0.147	-0.137	0.209	-0.173	-0.0835	0.00657	-0.00245	0.0466	0.0349	0.0406	0.206	-0.0429	-0.175	0.0496	-0.0751	-0.0463	-0.136	-0.0805	0.021	0.0211	0.125	-0.0733
PCDBF_HUMAN	PCDHB15	0.0812	-0.346	-0.0274	-0.046	0.0932	-0.0142	-0.105	0.54	-0.12	0.968	0.363	-0.333	0.0468	0.509	-0.399	0.0183	-0.153	-0.297	0.0782	0.117	0.0767	0.129	-0.667	0.43	-0.482	0.0922	0.124	-0.165	-0.00684	-0.226
PCDC2_HUMAN	PCDHAC2	0.0209	0.019	0.0321	0.0532	-0.0207	0.164	-0.271	0.0155	-0.0812	-0.0625	0.0828	-0.239	0.00588	0.0372	-0.0415	-0.13	-0.0569	0.155	0.216	0.076	-0.112	-0.0957	-0.0079	-0.112	0.0408	0.169	-0.0927	0.12	0.189	0.0701
PCDG6_HUMAN	PCDHGA6	-0.11	-0.157	0.136	-0.132	0.278	-0.362	0.369	0.103	-0.106	0.0505	-0.47	0.12	-0.00725	-0.493	-0.19	-0.29	0.425	0.239	0.0808	-0.38	0.139	-0.113	0.327	0.0783	-0.0638	0.163	-0.156	-0.232	-1.2	0.11
PCDGC_HUMAN	PCDHGA12	0.105	0.126	0.258	-0.162	0.152	0.0298	0.0393	0.0546	-0.0216	-0.18	-0.0217	-0.13	-0.014	-0.148	-0.0407	0.0437	-0.0385	-0.017	0.214	0.0433	0.239	0.0724	0.114	0.11	-0.0221	0.00953	-0.0238	-0.103	-0.0321	-0.0147
PCDGE_HUMAN	PCDHGB2	0.251	0.0839	-0.231	0.338	0.35	-0.0955	0.243	-0.061	0.0174	-0.239	0.188	-0.222	0.331	0.159	-0.0893	0.0822	-0.117	-0.301	0.274	0.15	-0.387	-0.189	-0.337	0.227	-0.249	0.259	-0.195	0.0453	-0.0928	0.0533
PCDGH_HUMAN	PCDHGB5	0.152	0.0185	0.328	-0.561	-0.169	-0.105	-0.13	-0.273	0.505	-0.596	-0.00522	-0.136	0.0673	-0.221	-0.0318	0.492	0.089	-0.17	0.17	-0.107	0.359	0.121	-0.075	-0.0323	-0.17	0.167	-0.138	-0.477	-0.288	-0.283
PCDGJ_HUMAN	PCDHGB7	0.045	-0.078	0.211	0.148	0.046	-0.0994	0.144	-0.228	0.122	-0.29	0.148	0.12	-0.313	0.0101	-0.119	-0.0141	-0.181	0.00978	0.289	-0.0216	0.12	0.0343	-0.0374	-0.0573	0.238	-0.0893	-0.0627	-0.152	-0.163	-0.357
PCDGK_HUMAN	PCDHGC3	0.0526	-0.0484	0.261	-0.0613	-0.0239	0.017	-0.0613	-0.0868	-0.0658	0.0943	0.13	-0.0542	0.0239	0.172	-0.0367	-0.12	0.0498	0.119	0.257	0.157	0.223	-0.0146	-0.0113	-0.0171	0.144	-0.0263	-0.144	0.0508	0.02	0.0075
PCDGL_HUMAN	PCDHGC4	-0.0129	-0.122	0.0497	0.0672	-0.106	0.0864	-0.0196	0.0762	-0.245	0.0372	-0.0129	0.0388	-0.0143	0.00916	0.194	-0.103	-0.109	0.138	0.154	0.0871	-0.237	-0.0566	-0.055	0.0233	-0.0429	0.134	-0.205	-0.117	-0.0188	0.151
PCDGM_HUMAN	PCDHGC5	0.0726	0.0429	-0.296	0.138	-0.0459	0.00436	-0.221	-0.0248	-0.275	-0.0767	0.14	0.078	0.323	0.0678	-0.261	-0.00996	0.0328	0.0532	0.0599	-0.0397	-0.115	-0.267	0.0133	0.0182	-0.302	0.406	0.0455	-0.0334	0.0889	-0.0272
PCDH1_HUMAN	PCDH1	0.0371	0.0839	-0.192	0.139	-0.0405	0.119	-0.129	0.0496	-0.056	-0.129	0.148	-0.187	0.0928	0.113	-0.0618	-0.0517	-0.0621	-0.00907	0.195	0.0447	-0.201	-0.169	-0.00892	-0.0588	-0.0956	0.166	-0.0361	0.11	0.224	0.08
PCDH7_HUMAN	PCDH7	-0.0381	0.113	-0.266	0.172	0.0237	0.134	-0.144	-0.0385	0.107	-0.261	0.083	0.0309	0.174	-0.148	-0.0403	0.101	-0.0405	0.0281	0.0724	-0.297	-0.129	-0.0368	-0.0314	-0.208	-0.338	0.186	0.0593	0.0166	0.168	-0.0427
PCDH8_HUMAN	PCDH8	0.0946	0.0459	-0.339	0.275	0.207	0.0506	-0.145	0.209	0.116	-0.176	0.0117	-0.213	0.455	0.227	-0.055	-0.084	-0.0515	-0.0745	0.0241	-0.126	-0.395	-0.0748	-0.115	-0.0493	-0.508	0.37	0.0563	0.0906	0.0925	-0.00444
PCDH9_HUMAN	PCDH9	0.0513	-0.0885	-0.385	0.137	-0.0619	-0.166	-0.0209	0.0499	-0.0518	-0.0523	0.0827	-0.188	0.0417	0.107	-0.0301	0.0191	0.128	-0.0768	0.018	-0.256	0.00862	-0.214	-0.00633	-0.142	-0.271	0.223	0.106	-0.0146	0.153	-0.109
PCOC1_HUMAN	PCOLCE	0.0497	0.2	0.125	-0.0787	-0.0659	0.015	0.209	-0.127	0.17	-0.246	-0.0795	0.0107	-0.0383	0.175	0.0128	-0.114	-0.0526	0.218	-0.0965	0.232	0.222	0.297	-0.0186	-0.13	0.183	-0.0581	0.00497	0.0246	-0.125	0.228
PCP_HUMAN	PRCP	0.0239	0.0441	0.287	-0.333	-0.133	-0.195	0.0944	-0.344	-0.0153	-0.0166	-0.15	0.0901	-0.072	-0.00577	0.15	-0.00268	0.217	0.00479	-0.0211	-0.381	-0.0682	0.0914	0.235	-0.25	-0.0857	0.0388	0.0397	-0.0905	0.138	0.012
PCP4_HUMAN	PCP4	-0.0173	0.206	0.252	-0.0773	-0.0648	-0.0333	0.073	-0.0307	-0.0584	-0.0134	0.0832	-0.187	0.0446	0.0121	-0.147	0.0535	0.0263	0.151	0.135	0.231	-0.129	-0.158	-0.0198	-0.0298	-0.0682	0.0571	-0.0791	0.182	0.267	0.043
PCSK1_HUMAN	PCSK1N	-0.00901	0.00385	0.326	0.143	0.0673	-0.378	-0.198	0.129	-0.191	0.0789	-0.129	-0.00402	0.16	-0.276	-0.165	-0.00412	-0.0654	0.332	0.0819	-0.036	-0.0964	-0.12	0.0351	0.331	0.0223	-0.14	0.0372	0.0406	-0.117	0.0503
PCSK6_HUMAN	PCSK6	-0.148	0.238	-0.00121	-0.00303	-0.0584	0.117	-0.16	0.274	0.058	-0.0394	0.229	0.219	0.109	0.0526	0.0125	-0.0357	-0.0864	0.127	-0.145	-0.116	-0.153	0.216	0.0127	-0.119	0.0888	-0.0489	0.00567	0.0608	-0.132	0.0674
PCSK9_HUMAN	PCSK9	-0.0913	-0.159	0.166	0.0115	0.131	0.0348	0.272	0.156	-0.0239	0.349	0.26	0.0907	-0.383	0.225	0.0404	-0.0802	-0.208	-0.0382	-0.0702	-0.125	-0.0278	-0.0846	0.105	0.552	0.243	-0.116	-0.0064	0.0667	-0.135	-0.139
PCYOX_HUMAN	PCYOX1	-0.128	0.298	-0.278	0.151	0.459	-0.212	-0.176	-0.184	-0.179	-0.0613	0.437	-0.391	-0.0573	0.118	-0.158	0.414	-0.0768	-0.241	0.131	0.569	-0.199	-0.274	0.00566	0.011	0.0901	-0.129	0.653	-0.064	0.475	0.00187
PD1L2_HUMAN	PDCD1LG2	-0.191	-0.337	-0.0446	-0.00263	0.0552	-0.00595	0.278	0.00909	-0.0567	0.453	0.0498	0.417	-0.391	0.105	0.00371	0.188	-0.305	-0.308	0.0985	-0.318	0.266	0.519	0.111	0.272	0.271	-0.342	-0.118	0.00436	-0.626	-0.0713
PDC6I_HUMAN	PDCD6IP	0.122	-0.0134	0.136	-0.534	0.162	0.115	-0.245	-0.106	0.0699	0.618	-0.176	0.381	0.367	-0.147	0.0407	0.0636	-0.234	0.235	-0.211	-0.155	-0.231	0.21	-0.015	0.214	0.0538	-0.112	-0.261	0.108	-0.573	-0.0518
PDCD5_HUMAN	PDCD5	0.00157	-0.0459	-0.153	0.348	0.000435	-0.0177	-0.406	0.482	-0.276	0.298	-0.33	-0.606	0.169	-0.451	-0.499	-0.216	0.219	0.0722	0.527	0.0826	-1.39	-0.1	-0.147	-0.145	0.281	0.106	-0.212	-0.109	0.409	-0.0971
PDGFA_HUMAN	PDGFA	-0.0276	-0.0475	0.0948	-0.00295	0.0774	-0.215	0.0636	0.18	-0.0393	-0.18	0.0536	-0.195	-0.109	0.0488	-0.0424	-0.00348	-0.0558	0.172	0.142	0.126	-0.177	-0.104	-0.0946	0.114	0.0681	0.0259	-0.0147	0.0982	-0.14	0.0558
PDGFB_HUMAN	PDGFB	-0.0409	-0.139	0.0774	0.0932	0.0862	0.073	-0.0549	0.277	0.104	0.682	-0.124	-0.0517	0.13	-0.0714	-0.0244	0.499	-0.00615	-0.0139	0.0982	0.285	-0.0859	0.107	0.0984	0.745	0.0209	-0.00255	0.0405	-0.102	-0.0734	-0.0123
PDGFD_HUMAN	PDGFD	-0.0447	-0.0129	0.00379	-0.178	-0.172	-0.178	0.0523	0.141	0.27	0.366	-0.247	0.0399	0.0445	-0.15	0.118	0.114	0.207	-0.198	-0.154	0.0876	0.178	0.0563	-0.0688	-0.0536	0.178	-0.00886	-0.0568	0.204	-0.159	0.238
PDIA1_HUMAN	P4HB	-0.0069	0.0961	0.0853	-0.0417	-0.197	0.0473	0.0702	0.0295	0.0269	0.00302	-0.058	0.0902	-0.0774	0.0961	-0.0342	0.0558	-0.0911	0.0449	0.000222	-0.0829	-0.146	-0.00948	0.0161	0.00897	0.157	-0.016	-0.0767	0.0332	-0.0354	-0.031
PDIA3_HUMAN	PDIA3	-0.0862	0.228	0.0681	-0.0315	-0.0612	-0.0347	-0.0326	0.0523	-0.00653	-0.0191	-0.108	-0.113	0.0941	-0.00458	0.089	-0.024	0.112	0.0708	0.036	-0.0865	-0.18	0.00515	0.0666	-0.143	0.0314	0.01	-0.0533	0.0802	0.0928	0.0971
PDIA4_HUMAN	PDIA4	-0.0139	0.139	0.0382	-0.00395	-0.103	-0.0745	-0.0374	-0.181	-0.0815	-0.196	-0.00222	-0.0624	0.043	-0.059	-0.156	-0.18	0.0777	0.0674	0.0402	0.0604	-0.2	-0.0871	0.0764	0.0276	0.0144	0.12	-0.042	0.141	0.0544	-0.0142
PDIA6_HUMAN	PDIA6	-0.19	0.0502	-0.0816	0.0648	0.0427	-0.147	-0.0543	0.0903	-0.00551	0.189	-0.0269	-0.139	-0.149	0.032	-0.185	0.24	-0.15	-0.0706	0.0377	0.0769	-0.216	-0.142	-0.0318	0.0811	-0.0586	0.0874	-0.0174	0.105	0.0756	0.153
PDXL2_HUMAN	PODXL2	-0.0804	-0.0708	-0.0114	0.0776	-0.019	0.106	-0.0867	0.0981	-0.0703	0.644	0.15	-0.127	0.168	0.165	-0.169	0.15	0.0714	0.408	0.262	0.112	-0.196	-0.156	0.0288	0.59	-0.0527	-0.0592	-0.199	-0.042	0.0841	-0.0257
PDYN_HUMAN	PDYN	0.178	0.177	0.0169	0.237	0.0572	-0.289	-0.292	-0.0518	0.128	-0.166	0.262	-0.145	0.381	-0.136	-0.226	0.0757	-0.173	-0.167	0.179	0.307	-0.352	0.0956	-0.0773	0.0257	-0.277	0.363	0.0593	0.000722	-0.0405	0.225
PEA15_HUMAN	PEA15	-0.0332	-0.024	-0.13	0.109	-0.0231	-0.129	0.00809	0.527	0.00332	1.36	0.197	0.341	-0.172	0.528	0.126	0.206	-0.125	-0.302	0.357	0.442	-0.0723	0.0419	-0.117	1.37	-0.0622	-0.123	0.0869	0.0389	-0.0563	0.00735
PEBP1_HUMAN	PEBP1	0.174	0.0837	-0.221	0.109	-0.105	-0.0156	0.0235	0.0922	0.0352	-0.085	-0.0852	-0.228	0.119	0.0823	0.205	-0.142	0.12	0.0959	0.198	0.135	-0.332	-0.0625	-0.109	-0.147	-0.0633	0.082	-0.0641	0.0235	0.266	0.0346
PEBP4_HUMAN	PEBP4	0.0948	0.135	-0.247	-0.283	-0.0377	0.445	0.137	-0.715	-0.394	-0.24	0.0141	0.283	0.157	-0.598	0.305	-0.936	0.102	0.593	-0.0324	-0.249	-0.624	-0.00357	0.0696	-0.396	0.546	-0.292	-0.338	0.196	-0.511	0.474
PECA1_HUMAN	PECAM1	-0.154	0.0131	-0.178	-0.0623	0.0615	-0.236	-0.079	0.177	0.0293	0.59	-0.0371	-0.102	-0.102	0.689	0.0096	-0.204	0.209	-0.0696	0.149	0.123	0.0358	-0.305	-0.138	-0.195	0.0849	0.0923	-0.0848	0.0617	0.27	0.218
PEDF_HUMAN	SERPINF1	0.0591	0.263	0.457	-0.416	-0.136	0.282	-0.156	-0.446	0.214	-0.462	-0.0453	0.434	0.204	-0.546	-0.0312	0.0793	0.259	0.139	-0.495	-0.0476	-0.136	0.563	-0.0287	-0.469	-0.0432	-0.104	-0.144	0.0726	-0.354	0.31
PENK_HUMAN	PENK	0.162	0.078	-0.0136	-0.119	-0.31	0.054	-0.327	-0.201	-0.0997	-0.0629	-0.0102	0.0336	0.362	-0.023	-0.344	0.0814	-0.058	-0.0906	-0.0559	0.168	0.209	0.152	-0.133	-0.108	-0.27	0.0213	-0.221	-0.148	0.151	0.00141
PEPA3_HUMAN	PGA3	0.092	-0.18	0.44	0.403	-0.488	-0.0427	1.44	-0.0504	-0.0588	-0.332	-0.648	1.35	0.244	0.651	-0.184	-0.8	0.15	0.0473	-0.202	-0.298	-0.804	-0.529	0.994	-0.813	1.22	0.332	0.267	0.0851	-0.491	0.388
PEPD_HUMAN	PEPD	-0.107	-0.498	-0.267	-0.132	0.267	0.00434	0.092	0.0976	0.0164	0.231	0.11	0.222	-0.595	-0.192	0.0381	-0.134	0.239	-0.434	0.00929	0.0936	0.289	-0.054	-0.0312	0.254	0.381	-0.406	-0.159	0.00693	-0.494	-0.233
PF4V_HUMAN	PF4V1	-0.104	-0.689	-0.0468	-0.408	0.524	-0.214	0.0243	-0.145	0.571	2.11	0.097	0.926	-1.1	-0.93	-0.0787	0.185	0.181	-0.443	0.807	0.647	0.399	-0.366	-0.474	0.302	0.365	-0.181	-0.228	-0.118	1.11	0.176
PGAM1_HUMAN	PGAM1	0.000153	-0.0705	-0.0253	0.0731	0.112	-0.16	-0.0767	0.337	-0.123	0.493	0.0177	-0.144	-0.138	0.218	0.301	-0.0172	0.0273	-0.0741	0.174	0.19	-0.0481	-0.0409	-0.117	0.307	-0.0379	-0.0795	0.127	0.113	0.237	0.00934
PGBM_HUMAN	HSPG2	-0.201	0.288	-0.0879	-0.113	-0.0262	-0.0421	0.0682	0.05	0.154	-0.0271	-0.108	0.13	-0.161	-0.108	-0.107	0.0142	-0.0695	0.154	-0.0896	0.212	0.238	0.113	0.097	0.0129	0.0536	-0.0907	0.0684	-0.00948	-0.26	0.0592
PGCB_HUMAN	BCAN	0.187	0.241	-0.0636	0.135	-0.0427	0.0214	-0.0163	-0.32	-0.014	-0.211	-0.0223	-0.097	0.0489	-0.123	-0.00743	0.0427	0.0596	0.346	-0.013	-0.365	-0.511	-0.0927	-0.102	-0.0485	-0.327	0.184	-0.034	-0.00424	0.198	-0.142
PGFRA_HUMAN	PDGFRA	0.182	0.287	-0.127	0.156	-0.0562	0.157	-0.137	0.0806	0.0435	0.15	-0.0371	-0.0698	-0.17	0.0296	-0.01	0.0699	0.127	-0.0444	0.327	0.00694	-0.183	0.0481	-0.00388	-0.17	-0.205	-0.0781	0.261	0.0549	0.234	-0.0237
PGFRB_HUMAN	PDGFRB	-0.208	-0.0207	-0.33	0.161	-0.135	-0.0278	-0.00665	0.0298	0.167	0.139	-0.113	-0.0768	0.119	-0.226	-0.00816	0.202	0.284	0.211	-0.0249	-0.0606	0.124	-0.017	-0.232	0.706	-0.0921	-0.107	0.0652	-0.204	0.113	0.0404
PGFRL_HUMAN	PDGFRL	0.0309	-0.442	0.379	-0.546	-0.112	-0.171	0.162	-0.109	-0.124	0.047	0.123	0.23	0.13	-0.414	0.00541	0.0344	-0.248	-0.107	-0.213	0.0106	0.281	0.13	0.0635	-0.417	-0.086	0.292	-0.0373	-0.109	-0.478	0.0669
PGK1_HUMAN	PGK1	0.0125	-0.114	-0.13	0.158	0.0861	-0.147	-0.232	0.417	-0.0584	0.763	0.0631	-0.168	-0.0671	0.399	0.331	0.188	-0.268	-0.111	0.0581	0.147	-0.157	-0.123	-0.134	0.589	-0.00212	0.0637	0.161	-0.0119	0.15	-0.0627
PGM1_HUMAN	PGM1	0.232	-0.124	0.00371	-0.165	0.0381	-0.0192	-0.14	0.0869	-0.129	0.0567	0.0158	-0.213	0.0219	0.0992	0.0602	-0.231	-0.158	-0.0973	-0.214	0.163	0.061	-0.0668	-0.109	0.0485	0.0186	0.0869	0.0608	-0.154	0.0126	-0.233
PGM2_HUMAN	PGM2	-0.261	-0.24	-0.0128	0.0726	0.308	0.206	-0.449	1.04	-0.329	1.5	-0.0924	0.36	-0.0474	0.284	0.977	0.602	-0.073	-0.564	-0.263	0.0611	0.109	0.111	0.175	1.27	0.0421	-0.087	-0.0632	-0.0249	-0.262	-0.366
PGP_HUMAN	PGP	0.0492	-0.0804	0.00502	-0.0715	0.251	0.0353	-0.429	0.23	-0.00705	0.485	-0.131	0.314	0.125	-0.337	-0.268	0.14	0.139	0.418	0.211	0.139	-0.0547	0.071	-0.0822	0.435	-0.0669	-0.177	0.0529	-0.0254	-0.257	0.0588
PGRC1_HUMAN	PGRMC1	0.0615	0.123	-0.0153	0.0411	0.0317	-0.0308	0.139	-0.0702	0.174	-0.113	-0.0906	-0.0635	-0.047	0.0331	0.107	-0.0657	0.147	0.119	-0.00454	0.067	-0.0323	0.166	0.0403	-0.00679	-0.0817	0.0114	0.0194	0.0525	-0.114	-0.0383
PGRP2_HUMAN	PGLYRP2	0.373	-0.373	0.129	-0.23	0.358	-0.311	0.535	-0.00636	0.367	-0.365	0.316	0.627	-0.537	0.108	-0.0376	-0.0788	-0.189	-0.453	0.0689	0.28	0.825	-0.256	0.212	0.134	0.774	-0.38	-0.193	0.064	-0.411	-0.0883
PGS1_HUMAN	BGN	0.01	-0.02	0.31	-0.322	0.113	0.0794	-0.248	0.0114	0.309	-0.234	-0.389	-0.0273	0.126	-0.167	0.321	0.0532	0.113	0.307	-0.458	-0.012	-0.00928	0.393	-0.0602	-0.215	-0.136	-0.296	0.182	0.073	-0.109	-0.174
PGS2_HUMAN	DCN	0.189	-0.0379	0.579	-0.19	-0.297	-0.0782	0.0291	0.138	0.101	-0.209	-0.08	0.485	0.00948	-0.449	0.42	0.0228	0.0819	0.294	-0.143	-0.117	-0.197	0.438	0.653	-0.323	0.0474	-0.0499	0.154	0.00675	-0.247	-0.00439
PHLD_HUMAN	GPLD1	-0.0256	-0.262	-0.553	0.435	0.268	0.022	0.646	0.0186	-0.107	0.0884	0.14	0.402	-0.459	0.56	-0.316	-0.201	-0.078	-0.363	0.398	0.521	0.891	0.201	0.109	-0.273	0.72	-0.174	0.269	-0.11	-0.0802	-0.0537
PHP14_HUMAN	PHPT1	-0.199	-0.0474	-0.0287	0.0415	0.283	0.186	-0.293	0.295	-0.0826	0.639	-0.529	0.602	-0.0218	-0.00711	0.523	0.337	-0.165	0.0339	-0.305	-0.0246	0.0836	0.285	-0.232	1.09	-0.155	-0.223	0.114	0.0419	-0.362	0.0697
PI16_HUMAN	PI16	0.00839	-0.0219	-0.0829	-0.14	0.173	-0.272	0.341	-0.214	0.113	-0.245	0.0311	0.0382	0.0396	0.189	0.354	-0.3	-0.0698	-0.309	-0.138	0.236	0.603	-0.117	0.228	-0.153	0.366	-0.0173	0.215	-0.166	0.00142	0.07
PIGR_HUMAN	PIGR	-0.0462	0.259	-0.13	-0.433	0.198	-0.0136	0.037	0.0304	0.642	-0.0696	-0.526	0.302	-0.0568	-0.525	0.0701	-0.252	1.05	0.00978	0.0233	-0.0439	0.284	0.387	-0.0603	-0.0256	-0.00325	-0.505	0.0119	0.13	0.453	-0.328
PILRA_HUMAN	PILRA	0.317	0.301	-0.264	0.0663	-0.0955	-0.347	-0.00526	-0.254	0.298	-0.429	-0.0353	0.318	-0.489	-0.262	0.231	-0.325	0.484	0.548	-0.375	-0.0533	0.261	0.252	0.278	-0.286	0.0114	-0.0197	0.0268	0.117	-0.0911	-0.329
PIMT_HUMAN	PCMT1	1.65e-05	-0.329	-0.365	0.174	0.0245	-0.396	0.0753	0.257	-0.0406	0.279	0.0266	-0.418	0.177	-0.204	-0.197	-0.0344	-0.0111	-0.202	0.454	0.338	-0.294	-0.393	0.157	0.0252	0.063	0.121	0.193	-0.13	-0.0784	-0.00268
PITH1_HUMAN	PITHD1	-0.0532	-0.043	-0.1	0.0646	-0.0429	0.0672	-0.243	0.236	-0.075	0.479	-0.182	-0.151	0.0985	-0.284	-0.12	0.0524	0.0204	0.212	0.139	0.165	-0.57	-0.00649	-0.0246	0.0619	-0.221	0.0235	-0.0931	0.113	0.049	0.08
PKDCC_HUMAN	PKDCC	0.0517	-0.104	-0.409	-0.159	0.148	-0.118	0.472	0.00245	-0.191	0.136	-0.146	-0.0049	0.0799	-0.252	-0.292	0.217	-0.249	0.0387	0.0761	0.316	0.494	0.0544	0.0314	-0.131	0.31	-0.0807	0.00425	-0.0774	-0.103	0.133
PKHB1_HUMAN	PLEKHB1	0.178	-0.242	-0.209	0.191	-0.00918	-0.504	0.0137	0.052	0.0291	-0.457	-0.0259	-0.366	0.0645	-0.00815	-0.236	-0.407	-0.0014	-0.178	0.327	0.172	-0.389	-0.118	0.095	0.169	0.0678	-0.303	-0.301	-0.11	0.0795	-0.134
PLBL2_HUMAN	PLBD2	0.0593	-0.0881	-0.000116	-0.243	0.0183	-0.359	0.466	0.0914	-0.116	0.255	0.121	0.177	0.0539	-0.179	0.285	-0.00949	0.467	-0.0579	-0.0668	-0.325	-0.11	-0.217	0.187	-0.174	-0.0644	0.0348	0.323	-0.07	0.229	-0.192
PLD3_HUMAN	PLD3	0.194	-0.0734	0.00461	-0.153	0.0425	0.00505	-0.188	-0.0407	-0.0115	0.238	0.0504	-0.0109	0.19	-0.102	0.0215	0.11	0.199	-0.0381	-0.00908	-0.538	-0.218	-0.128	-0.0857	-0.00268	-0.391	0.3	0.184	-0.0356	0.176	-0.156
PLD4_HUMAN	PLD4	0.208	0.129	0.3	-0.0683	0.236	-0.353	-0.209	-0.0127	0.15	-0.275	-0.0724	-0.0697	0.236	0.0676	-0.188	-0.0272	0.309	-0.0743	0.0686	-0.33	-0.102	0.233	0.0179	0.339	0.22	0.144	-0.129	-0.278	-0.00393	-0.0605
PLDX1_HUMAN	PLXDC1	-0.227	-0.0448	0.41	-0.234	0.216	0.236	0.231	-0.079	0.376	0.122	-0.304	0.129	0.17	-0.186	-0.0381	0.245	0.218	0.518	0.0164	-0.022	-0.114	0.0442	-0.0186	0.656	0.0104	-0.102	-0.178	0.328	0.0132	-0.00329
PLIN3_HUMAN	PLIN3	0.139	-0.127	-0.186	0.14	0.287	-0.298	0.165	0.459	0.179	0.507	0.0311	-0.192	0.0444	0.209	-0.126	0.0811	0.152	-0.232	-0.341	0.362	0.32	-0.241	0.042	0.387	0.17	-0.279	-0.117	0.0527	0.0214	-0.0482
PLMN_HUMAN	PLG	0.0931	-0.392	0.238	-0.32	0.667	0.576	0.514	-0.666	0.0409	-0.0665	0.563	0.972	-0.58	0.0704	-0.166	-0.716	0.00385	-0.277	-0.0445	0.117	1.13	0.587	0.3	0.0413	0.906	-0.514	0.0544	0.0102	-0.467	-0.113
PLOD1_HUMAN	PLOD1	-0.0075	0.0657	0.167	-0.181	-0.0661	-0.105	0.0378	-0.11	-0.00196	0.242	0.00784	0.0884	0.0232	0.0293	0.322	-0.0625	0.0755	-0.014	-0.0526	-0.16	-0.206	0.0288	0.109	-0.0442	0.0981	-0.0708	-0.0651	0.125	-0.0176	0.00921
PLOD2_HUMAN	PLOD2	-0.00926	-0.0306	0.579	-0.55	0.356	0.207	0.0458	-0.545	0.122	-0.52	-0.0843	0.316	0.177	-0.258	0.644	-0.154	0.0143	0.285	-0.221	-0.456	-0.236	0.487	-0.111	0.0185	0.122	-0.181	-0.314	0.142	-0.38	0.454
PLOD3_HUMAN	PLOD3	0.0208	0.106	0.19	-0.327	-0.0349	-0.0286	0.034	-0.247	0.0719	0.0486	-0.145	0.0595	0.088	-0.356	0.0632	0.0583	0.114	0.089	-0.135	-0.352	-0.272	0.256	0.11	-0.0113	-0.0571	-0.259	-0.183	0.00769	-0.0847	-0.125
PLPP_HUMAN	PDXP	0.0383	-0.167	-0.329	0.105	0.212	-0.041	-0.21	0.352	-0.114	0.528	0.255	-0.00156	-0.157	0.143	-0.181	0.331	-0.276	-0.115	-0.033	0.18	-0.731	0.0249	-0.219	0.29	-0.347	0.114	0.0937	-0.137	-0.0143	0.0145
PLSL_HUMAN	LCP1	-0.00143	-0.161	-0.138	0.186	0.415	-0.028	0.312	-0.0875	0.00439	-0.0598	0.29	0.398	-0.29	0.173	0.0751	0.0432	0.0205	-0.307	-0.0723	0.0407	0.318	0.0982	0.315	0.123	0.563	-0.247	-0.0907	0.0599	-0.172	-0.0396
PLST_HUMAN	PLS3	-0.198	0.0112	0.0087	-0.00303	0.146	-0.21	-0.166	0.317	-0.0333	0.299	-0.0433	0.0903	-0.134	0.418	0.368	0.325	-0.0443	-0.153	-0.132	0.191	0.511	0.215	-0.107	0.128	0.352	-0.143	0.0759	-0.0106	-0.299	-0.0974
PLTP_HUMAN	PLTP	0.0383	0.161	-0.195	-0.051	-0.116	-0.294	0.245	0.024	0.076	-0.147	-0.211	0.209	-0.0365	0.24	-0.0254	0.166	-0.0666	-0.0877	-0.114	0.2	0.214	0.174	0.1	-0.177	0.0883	0.142	0.0727	0.0819	-0.251	-0.07
PLXA1_HUMAN	PLXNA1	0.0225	0.0256	-0.445	0.18	0.0665	0.0214	-0.133	-0.0597	-0.138	-0.0113	-0.0504	0.0165	0.0941	-0.0717	-0.121	0.0855	0.203	-0.0151	-0.0393	-0.358	-0.251	-0.0388	-0.14	-0.104	-0.492	0.347	0.0694	0.045	0.0955	-0.0522
PLXA4_HUMAN	PLXNA4	0.0322	-0.0174	-0.214	0.0086	-0.056	0.105	-0.321	0.0934	-0.073	0.397	-0.14	0.409	-0.183	-0.378	0.0402	0.157	0.00918	-0.12	-0.131	-0.329	0.219	-0.332	0.0663	0.0274	0.0935	0.15	0.0869	-0.0875	-0.0636	-0.00886
PLXB1_HUMAN	PLXNB1	0.0363	0.0184	-0.104	-0.18	-0.106	0.0059	-0.124	-0.0317	-0.0341	0.355	0.13	-0.088	-0.0507	0.0221	-0.0186	0.00266	0.0521	-0.0486	0.217	-0.0332	-0.016	0.0118	0.143	-0.0453	0.0943	-0.089	0.0308	-0.105	0.195	-0.0802
PLXB2_HUMAN	PLXNB2	0.0876	-0.0261	0.14	-0.227	-0.132	0.0346	0.0383	-0.101	0.176	-0.067	-0.0492	-0.226	-0.0578	-0.0471	0.0516	-0.17	0.109	0.212	0.158	-0.0465	0.0454	-0.00592	0.0212	-0.094	0.186	-0.0227	-0.0246	0.044	0.0124	-0.126
PLXB3_HUMAN	PLXNB3	0.13	0.224	-0.0724	-0.0383	0.097	-0.0864	0.157	-0.125	0.0861	0.00739	0.0998	-0.126	0.0572	-0.0387	0.123	-0.0996	0.0209	0.132	-0.0821	-0.175	-0.0793	0.0613	-0.0219	0.00696	-0.183	0.195	0.031	0.023	0.0264	-0.168
PLXD1_HUMAN	PLXND1	0.116	0.0381	-0.199	0.231	0.0027	0.231	0.199	-0.0675	0.0518	-0.111	-0.171	0.0754	-0.0796	0.598	0.0211	-0.0164	-0.05	-0.0291	0.264	-0.17	-0.0457	0.151	-0.209	-0.0187	0.00781	0.207	0.17	-0.139	-0.0692	-0.164
PMGE_HUMAN	BPGM	0.201	-0.224	0.597	0.588	0.847	0.121	-0.0478	1.64	0.264	2.87	0.188	1.69	-0.439	-0.364	-0.414	2.19	-0.382	0.162	-0.351	-0.314	0.225	0.164	-0.127	2.91	0.0993	-0.283	0.557	-0.374	-0.109	-0.259
PMGT1_HUMAN	POMGNT1	-0.024	0.157	0.0245	0.0831	-0.073	-0.0154	-0.0946	0.0876	-0.00607	-0.084	0.0447	-0.15	0.0818	-0.0522	-0.0441	-0.0315	0.0101	0.161	0.0637	0.15	-0.286	0.00162	0.0365	0.00837	-0.021	0.052	-0.104	0.0831	-0.0551	0.0741
PNOC_HUMAN	PNOC	-0.00545	-0.125	0.108	0.0644	0.145	0.225	-0.201	0.0253	-0.0333	0.0983	0.0751	0.056	0.254	-0.173	-0.0621	-0.0991	-0.087	-0.0315	0.143	0.189	-0.0461	-0.0822	-0.136	0.0734	-0.177	0.294	-0.00672	-0.0668	0.117	-0.0489
PNPH_HUMAN	PNP	0.142	-0.271	0.464	0.264	0.553	0.74	0.221	1.48	0.0535	2.27	0.0965	1.21	-0.214	-0.0322	-0.0502	1.82	-0.39	-0.0895	-0.243	-0.438	0.143	-0.0891	-0.00813	2.32	0.196	-0.23	0.184	-0.161	0.159	-0.0261
PODN_HUMAN	PODN	-0.236	-0.166	-0.127	-0.0137	-0.172	-0.323	0.234	0.116	-0.0587	0.193	0.187	-0.309	-0.202	0.173	-0.0531	0.266	-0.0814	-0.248	0.0754	0.188	0.434	0.0182	0.0875	0.0622	0.28	-0.256	0.109	0.0883	-0.152	-0.18
PODXL_HUMAN	PODXL	0.0696	-0.00472	-0.112	0.356	0.0275	-0.206	0.106	0.114	0.133	0.0166	0.0951	-0.449	-0.0934	0.189	-0.0299	0.00791	-0.0153	-0.11	-0.0101	0.0274	0.413	-0.0163	0.0211	-0.201	-0.0395	0.0783	-0.106	-0.0218	0.321	-0.114
PON1_HUMAN	PON1	0.476	-0.848	-0.061	-0.173	0.0764	0.633	0.556	-0.622	-0.262	0.258	-0.147	0.888	-0.534	-0.303	0.112	-0.0665	0.131	-0.66	0.424	0.323	0.904	0.098	0.314	0.139	0.679	-0.396	-0.55	-0.0669	-0.384	-0.389
PON3_HUMAN	PON3	0.306	-0.338	-0.0381	-0.149	-0.0462	0.333	0.333	-0.434	-0.0797	-0.165	0.225	0.481	-0.458	0.0504	-0.104	0.157	0.43	-0.386	0.186	0.477	0.707	0.153	0.103	-0.0198	0.666	-0.309	-0.473	0.00326	-0.363	-0.266
PORIM_HUMAN	TMEM123	-0.0224	0.227	0.104	-0.0488	-0.141	0.232	-0.0142	0.151	0.0262	-0.493	-0.0238	0.241	0.0365	-0.343	-0.058	0.336	0.342	0.248	-0.228	0.186	0.108	0.00823	0.32	-0.208	-0.134	-0.104	-0.11	-0.0469	-0.0549	0.165
POSTN_HUMAN	POSTN	-0.248	-0.359	0.283	0.487	0.39	-0.0825	-0.127	0.334	0.749	-0.108	-0.312	-0.297	0.52	1.01	0.265	-0.455	-0.357	0.0542	-0.618	0.423	0.855	-0.149	0.13	-0.242	0.356	0.0711	-0.453	-0.0624	0.181	-0.254
POTEE_HUMAN	POTEE	0.585	0.816	0.87	-1.07	0.797	0.323	0.312	-0.271	-0.36	-0.0354	0.0217	1.18	-0.0224	-1.42	0.267	0.328	0.541	0.0659	-0.819	-0.8	-0.0611	0.788	-0.164	0.73	0.616	-0.599	-0.282	0.0262	-1.21	0.11
POTEJ_HUMAN	POTEJ	-0.557	-0.528	-0.707	-0.492	0.632	0.113	0.13	-1.1	0.0329	0.244	0.0192	0.621	-0.092	-0.48	0.169	0.157	-0.0669	0.0168	-0.923	-0.411	0.478	0.154	0.254	0.363	0.541	-0.517	-0.76	-0.314	-0.574	-0.0628
PP1A_HUMAN	PPP1CA	0.383	-0.407	0.358	-0.44	0.34	-0.351	-0.249	0.00963	0.0362	0.176	-0.352	-0.196	-0.201	-0.206	0.083	0.56	-0.386	-0.227	-0.318	-0.408	0.0881	-0.252	0.427	0.258	0.292	0.192	-0.301	0.0602	-0.192	0.0833
PP1R7_HUMAN	PPP1R7	-0.0773	0.0447	-0.17	0.0493	-0.00378	0.0498	-0.315	0.159	0.0287	0.394	0.0419	0.181	-0.238	-0.126	0.286	0.0898	-0.25	-0.0814	0.0268	0.0109	0.286	-0.234	0.00256	0.614	-0.0564	-0.267	0.0984	0.0369	-0.0617	-0.0156
PP2BA_HUMAN	PPP3CA	-0.0192	0.0923	-0.321	-0.0593	0.276	0.157	-0.0241	0.0242	-0.00952	-0.305	-0.00824	-0.222	0.121	-0.236	0.0686	-0.0563	0.168	0.11	0.217	0.0122	-0.359	-0.0556	-0.117	-0.0306	-0.2	0.143	0.169	0.0279	0.0751	-0.0171
PPA5_HUMAN	ACP5	0.0989	0.0285	0.166	-0.0776	-0.00291	0.295	0.139	-0.213	-0.0636	-0.134	-0.1	0.0162	0.15	0.0298	-0.0418	-0.108	0.0168	0.186	-0.328	0.0755	0.288	-0.00187	-0.0941	0.176	-0.0267	0.0846	-0.0613	0.161	-0.171	0.0699
PPAC_HUMAN	ACP1	-0.302	-0.4	-0.0747	0.106	0.0166	-0.0838	-0.311	0.546	0.277	1.19	0.0307	0.29	0.0795	-0.584	-0.507	0.372	0.373	-0.466	-0.183	-0.1	0.0278	-0.0631	-0.726	0.718	0.0067	-0.166	0.25	0.0607	-0.0557	0.083
PPAL_HUMAN	ACP2	0.00391	-0.296	-0.376	0.0997	-0.116	-0.388	0.0204	0.269	-0.221	0.581	-0.389	-0.242	0.0154	-0.0114	-0.49	0.159	0.123	0.0765	0.454	-0.0107	0.0025	-0.367	0.0725	0.0784	-0.266	0.248	0.115	-0.149	0.486	-0.376
PPCE_HUMAN	PREP	0.231	-0.0788	-0.205	0.0936	0.00751	0.157	-0.121	0.164	-0.166	0.0299	0.00443	-0.0892	0.282	-0.115	-0.0067	0.0179	0.162	0.0693	0.115	-0.152	-0.0603	-0.0872	-0.0522	-0.0486	-0.0778	0.153	0.0179	-0.157	0.0835	0.034
PPGB_HUMAN	CTSA	-0.00225	-0.00856	0.223	-0.293	-0.044	-0.0055	0.489	-0.0966	0.0875	-0.0378	-0.0281	0.34	0.0112	-0.0753	0.158	-0.0925	0.091	0.113	-0.163	-0.216	-0.0877	0.17	0.173	-0.0593	0.0988	0.0862	0.00967	-0.0651	-0.276	0.0016
PPIA_HUMAN	PPIA	-0.0208	0.00238	0.12	-0.215	0.0627	0.00316	-0.225	0.232	-0.0798	0.505	-0.18	0.334	0.016	-0.0944	0.258	0.137	-0.0111	0.05	-0.258	-0.071	-0.16	0.0677	-0.0172	0.528	0.045	-0.234	-0.0165	-0.0346	-0.138	-0.108
PPIB_HUMAN	PPIB	-0.0973	-0.164	-0.0981	0.0123	0.0618	-0.331	0.0665	0.0872	-0.189	0.338	0.0175	-0.00666	0.18	0.0133	-0.0408	0.0315	-0.116	-0.201	0.0716	-0.115	0.0497	-0.0502	-0.0166	-0.0752	-0.133	0.05	-0.245	0.0983	0.0726	0.147
PPIC_HUMAN	PPIC	-0.0961	-0.181	-0.712	0.184	0.0314	-0.307	0.00121	0.583	-0.0986	0.346	-0.0833	-0.258	0.106	0.0709	-0.512	0.4	0.00653	0.0637	0.215	-0.112	-0.272	-0.162	-0.219	0.276	-0.031	-0.23	0.209	0.322	0.17	-0.659
PPIE_HUMAN	PPIE	-0.212	-0.293	0.0552	0.15	0.164	-0.193	-0.385	0.577	-0.0304	0.837	-0.25	0.104	-0.124	0.386	0.673	0.417	0.16	-0.303	0.42	-0.2	-0.161	0.204	-0.116	0.688	-0.0309	-0.264	0.197	0.118	-0.0426	-0.0828
PPM1L_HUMAN	PPM1L	-0.0401	0.105	0.28	-0.142	-0.181	0.0614	0.204	0.0821	0.254	-0.0257	0.0698	-0.0785	-0.199	0.0725	0.0595	-0.0622	-0.11	0.0419	0.21	-0.0429	-0.0495	0.0107	0.161	0.0829	-0.0312	-0.0229	0.137	-0.0616	0.21	-0.0213
PPN_HUMAN	PAPLN	0.0157	-0.16	-0.255	0.185	-0.0747	-0.154	0.415	0.00946	0.0653	-0.0944	0.0755	-0.178	-0.15	0.459	-0.0947	-0.305	0.122	-0.323	-0.0136	0.187	0.102	0.0824	0.214	-0.191	0.318	0.00257	0.121	-0.0859	-0.26	-0.03
PPP5_HUMAN	PPP5C	-0.0158	0.157	-0.00871	0.0383	0.0162	0.178	-0.301	0.00245	0.205	-0.172	0.114	-0.364	0.265	-0.00756	-0.14	0.0187	-0.184	-0.101	0.0271	0.128	-0.46	-0.0244	-0.21	0.0101	-0.205	0.0445	-0.096	-0.234	0.218	-0.052
PPT1_HUMAN	PPT1	0.212	0.186	0.5	-0.476	-0.0285	0.0973	0.174	-0.139	0.183	-0.363	-0.119	0.517	0.0308	-0.284	0.206	-0.0968	0.336	0.524	-0.171	-0.176	0.0233	0.403	-0.212	-0.0653	-0.00898	-0.0323	0.0696	0.159	-0.427	0.183
PRAP1_HUMAN	PRAP1	-0.0394	-0.244	0.649	-0.544	0.121	-0.183	0.0704	0.0411	0.411	-0.12	-0.383	0.617	0.106	-0.477	0.302	-0.0168	-0.117	0.478	-0.183	0.453	0.728	0.78	0.122	0.0471	0.344	-0.333	-0.168	-0.105	-0.502	0.163
PRDX1_HUMAN	PRDX1	0.00118	-0.15	-0.0864	0.149	0.173	-0.187	-0.149	0.462	-0.182	1.14	0.0451	-0.34	2.32e-05	0.264	0.364	0.222	-0.0935	0.0618	0.359	-0.066	0.0532	-0.0969	-0.186	0.968	-0.201	0.0031	0.136	-0.028	0.115	-0.0554
PRDX2_HUMAN	PRDX2	0.376	-0.622	0.753	0.655	1.19	-0.0916	-0.276	1.93	-0.42	3.08	0.485	1.45	-0.136	-0.39	-0.00311	2.55	0.0352	0.392	-0.0683	-0.138	-0.0475	0.116	-0.325	3.11	-0.383	-0.043	0.779	0.0625	0.261	-0.199
PRDX3_HUMAN	PRDX3	-0.105	-0.0438	-0.0347	0.271	0.0695	-0.037	-0.0592	0.207	0.0327	0.366	-0.144	0.103	-0.126	0.018	0.316	-0.161	-0.00875	0.0921	0.168	0.0106	-0.197	-0.163	-0.0984	0.343	-0.0734	0.0548	0.0286	0.014	0.182	-0.0579
PRDX5_HUMAN	PRDX5	-0.0639	-0.104	0.352	0.269	0.0856	-0.084	-0.37	0.597	0.267	0.702	-0.245	0.163	-0.352	0.148	0.801	0.232	-0.227	-0.24	-0.442	0.0525	0.66	0.214	-0.0936	0.381	0.393	-0.206	0.242	-0.15	-0.205	-0.0751
PRDX6_HUMAN	PRDX6	0.0749	-0.265	0.15	0.374	0.368	-0.128	-0.208	1.61	-0.252	2.72	0.0495	0.471	-0.372	0.409	0.208	1.55	-0.616	-0.362	0.341	0.123	0.344	-0.103	-0.134	2.04	-0.117	-0.0759	0.613	0.0532	0.365	-0.219
PRELP_HUMAN	PRELP	-0.21	-0.012	0.223	-0.333	-0.129	-0.367	0.243	0.031	0.144	-0.184	-0.372	0.184	-0.263	-0.48	0.00737	0.128	0.0287	0.431	-0.107	-0.0217	0.21	0.308	0.0055	-0.248	0.0292	-0.192	0.0759	0.175	-0.431	-0.0124
PRG4_HUMAN	PRG4	-0.358	-0.559	0.482	-0.515	-0.457	-0.399	0.601	0.0618	-0.224	0.386	-0.114	-0.319	-0.692	0.991	-0.0191	0.21	-0.195	0.0883	-0.0075	0.471	0.68	0.0814	0.455	-0.146	0.867	0.00642	-0.232	-0.331	-0.406	0.18
PRIO_HUMAN	PRNP	-0.0568	-0.133	-0.234	0.302	0.0931	-0.082	0.0675	0.289	-0.0392	-0.157	-0.091	-0.213	0.206	0.192	-0.0238	-0.107	-0.0276	0.00538	0.18	0.171	-0.046	-0.103	-0.0284	-0.247	-0.102	0.294	0.0432	0.081	0.216	0.214
PRL_HUMAN	PRL	-0.00387	0.00302	1.3	-0.669	-0.0284	0.0421	-0.0615	-0.0706	0.244	0.00285	-0.41	-0.25	0.648	-0.127	0.232	0.733	-0.062	0.597	-0.447	-0.339	-0.0714	0.369	-0.548	-0.277	-0.185	0.522	-0.262	0.212	-0.602	0.567
PROC_HUMAN	PROC	0.019	-0.0081	0.466	-0.609	0.423	0.155	-0.0782	-0.22	0.153	-0.469	-0.113	0.796	0.338	-0.299	-0.195	0.0528	-0.0118	0.515	-0.246	0.00367	-0.317	0.408	0.111	-0.0897	0.0822	-0.0342	-0.0975	0.112	-0.321	0.076
PROF1_HUMAN	PFN1	-0.234	-0.0533	-0.257	-0.00835	0.234	-0.0812	-0.0694	0.181	-0.143	0.245	0.0434	0.0557	-0.00703	0.214	0.0587	-0.112	-0.106	-0.249	-0.209	0.241	0.0109	0.00471	0.121	0.289	0.16	-0.211	-0.152	0.119	-0.05	-0.0289
PROF2_HUMAN	PFN2	0.0769	-0.0477	-0.1	-0.0887	0.0546	0.221	-0.0797	-0.0463	0.0621	-0.398	-0.108	-0.135	0.147	-0.221	0.0842	-0.137	0.103	0.164	0.126	0.126	-0.431	-0.000341	-0.0586	-0.175	-0.0444	0.0395	0.0447	0.136	0.0686	0.0799
PROS_HUMAN	PROS1	0.0257	0.172	0.197	-0.302	-0.0505	-0.139	0.112	-0.143	0.174	-0.377	-0.157	-0.284	-0.163	0.0695	0.193	0.0965	0.0343	0.0887	0.0347	0.0296	0.36	0.214	-0.0285	-0.245	0.335	-0.115	-0.05	0.015	-0.204	0.129
PROZ_HUMAN	PROZ	0.0553	-0.444	0.306	-0.16	0.21	0.0834	0.35	-0.846	-0.248	0.193	-0.0275	0.365	-0.875	0.308	-0.363	0.00526	-0.351	-0.263	0.479	0.282	0.656	0.404	-0.144	0.256	0.591	-0.712	0.302	-0.601	-0.435	-0.447
PRPS1_HUMAN	PRPS1	-0.0378	-0.649	-0.408	0.161	0.718	-0.554	-0.504	1.6	-0.47	2.23	-0.304	0.481	-0.787	-0.366	-0.488	1.92	-0.642	-0.901	-0.541	0.0659	0.342	0.311	0.0196	1.74	0.55	-0.332	0.437	-0.0634	-0.518	-0.0599
PRRT1_HUMAN	PRRT1	-0.081	0.0658	-0.409	0.422	-0.181	0.0989	-0.167	0.277	-0.0135	0.186	0.0472	-0.00861	-0.118	0.162	-0.301	-0.11	-0.0105	0.121	0.268	0.0962	-0.168	-0.203	-0.131	-0.164	0.0165	0.248	0.00972	0.0357	0.289	0.12
PRRT2_HUMAN	PRRT2	0.011	-0.0461	-0.126	-0.0688	0.0256	0.385	-0.0315	-0.1	0.06	0.246	-0.197	0.231	-0.0955	-0.108	-0.0416	-0.13	-0.105	-0.246	0.258	0.0546	-0.177	0.159	-0.15	0.017	-0.193	0.163	0.1	-0.198	0.0921	0.0157
PRRT3_HUMAN	PRRT3	-0.0485	0.0533	-0.0263	0.112	-0.0607	0.138	-0.0465	0.0283	0.000974	-0.134	-0.0415	-0.155	0.16	0.0862	-0.093	0.0495	-0.0921	-0.105	0.0709	0.019	-0.0407	-0.0327	-0.00662	-0.0108	-0.103	0.109	-0.00143	-0.0184	0.123	0.0656
PRS23_HUMAN	PRSS23	-0.165	-0.221	-0.228	0.434	0.32	-0.282	-0.41	0.539	0.0534	0.224	0.0141	-0.0929	-0.267	0.686	-0.13	-0.202	-0.109	-0.00715	0.131	0.307	0.264	-0.152	0.105	-0.325	0.282	0.167	-0.307	0.148	0.466	-0.0577
PRS27_HUMAN	PRSS27	-0.00691	-0.0235	0.0233	-0.0506	0.0448	-0.104	0.0678	0.0435	-0.0472	-0.277	0.115	-0.0173	0.165	0.0315	0.147	-0.176	0.171	0.137	0.169	-0.0303	-0.00698	-0.134	0.0479	0.108	-0.0382	-0.0516	0.0509	0.0446	0.161	0.0168
PRSS8_HUMAN	PRSS8	-0.0338	0.311	0.164	0.103	0.0654	0.411	0.0258	-0.195	0.107	-0.619	-0.125	-0.126	-0.2	-0.0703	0.242	-0.438	0.0184	0.558	0.131	-0.0144	-0.168	0.363	-0.0124	-0.218	0.0733	-0.105	-0.337	0.218	-0.0888	0.152
PRVA_HUMAN	PVALB	-0.333	-0.0757	0.337	-0.199	0.153	0.24	0.656	0.00515	0.0945	0.285	0.0463	-0.358	-0.663	-0.377	-0.39	-0.0209	-0.121	0.446	0.277	-0.124	1.24	0.228	-0.129	0.187	0.141	-0.441	0.149	-0.226	-0.0876	-0.216
PSA_HUMAN	NPEPPS	0.0277	-0.071	-0.185	0.0697	-0.11	0.0266	-0.11	0.104	-0.059	0.1	0.155	-0.22	0.0344	0.0763	-0.0204	-0.055	-0.105	-0.0124	0.257	-0.0766	-0.0717	-0.115	-0.128	0.123	-0.0944	0.0974	0.0709	-0.000395	0.146	-0.0749
PSA1_HUMAN	PSMA1	0.136	-0.266	-0.0421	0.354	0.275	-0.324	-0.19	1.06	-0.11	1.78	0.226	0.475	-0.257	0.186	0.308	1.26	-0.0438	-0.201	-0.201	-0.419	0.295	-0.0583	-0.327	1.81	0.0357	-0.0968	0.138	-0.105	0.105	-0.148
PSA2_HUMAN	PSMA2	-0.155	-0.211	-0.023	0.0428	0.167	-0.386	-0.0933	0.764	-0.246	1.32	0.215	0.0511	-0.257	-0.116	0.37	1.02	-0.411	0.00317	0.0232	0.0174	0.138	-0.131	-0.211	1.22	-0.136	0.0168	0.34	-0.349	0.251	-0.384
PSA3_HUMAN	PSMA3	0.191	-0.254	-0.0192	0.278	0.326	-0.297	-0.222	0.982	-0.267	1.79	0.203	0.458	-0.281	0.138	0.29	1.14	-0.154	-0.226	-0.249	-0.316	0.122	-0.327	-0.252	1.56	-0.236	0.0583	0.184	-0.149	0.303	-0.233
PSA4_HUMAN	PSMA4	-0.0778	-0.152	0.0391	0.181	0.154	-0.359	-0.0946	0.91	-0.0528	1.6	0.397	0.537	-0.297	0.111	0.139	0.468	-0.422	-0.663	-0.155	-0.00975	0.306	-0.114	-0.0857	1.21	0.107	-0.0189	0.348	-0.0764	0.0189	-0.301
PSA5_HUMAN	PSMA5	-0.122	-0.0884	0.115	0.063	0.0679	-0.268	-0.272	0.705	-0.131	1.47	0.155	0.329	-0.874	-0.035	0.0668	0.876	0.282	-0.188	-0.15	-0.344	-0.126	-0.0416	-0.0983	1.34	-0.262	0.0317	0.0235	0.091	0.249	-0.000871
PSA6_HUMAN	PSMA6	0.0904	-0.258	-0.11	0.14	0.332	-0.0553	-0.101	0.912	-0.161	1.72	0.226	0.589	-0.486	-0.12	0.271	0.933	-0.234	0.101	-0.304	-0.503	0.2	-0.332	-0.287	1.57	0.169	-0.0662	0.316	-0.254	-0.00558	-0.287
PSA7_HUMAN	PSMA7	0.137	-0.353	0.0437	0.398	0.374	-0.169	-0.109	0.859	-0.148	1.5	0.35	0.228	-0.435	0.236	-0.0975	0.865	0.193	-0.316	-0.112	-0.454	0.407	-0.199	-0.171	1.39	-0.0223	0.0732	0.111	-0.0097	0.27	-0.182
PSB1_HUMAN	PSMB1	-0.147	-0.278	0.371	0.488	0.123	-0.309	-0.0605	1.25	-0.137	1.85	0.264	0.124	-0.153	-0.141	0.657	0.809	0.43	-0.323	0.475	-0.467	0.411	-0.222	0.0581	1.73	-0.0689	-0.393	0.045	-0.24	0.232	0.0863
PSB2_HUMAN	PSMB2	-0.0261	-0.138	0.115	0.429	0.252	-0.0277	0.353	0.812	0.091	2.01	0.136	0.554	-0.161	-0.687	0.577	0.749	0.00965	-0.0781	0.0881	0.184	0.104	-0.00714	-0.208	1.47	0.336	0.0124	0.0989	0.0293	0.00146	-0.332
PSB4_HUMAN	PSMB4	-0.0606	-0.568	-0.178	0.351	0.135	-0.479	-0.276	1.02	-0.409	1.66	0.475	0.314	-0.582	0.217	0.406	0.812	-0.576	-0.516	-0.0602	-0.43	0.0328	-0.359	-0.453	1.57	-0.371	0.0444	0.193	0.0104	0.343	-0.406
PSB5_HUMAN	PSMB5	0.119	0.16	-0.0194	0.492	0.266	-0.355	-0.0722	1.15	-0.152	1.89	0.316	0.689	-0.326	0.0725	0.183	0.782	-0.166	-0.562	-0.177	-0.219	-0.101	0.0221	-0.0278	1.57	-0.525	0.0931	0.526	0.0576	0.0441	0.0118
PSB6_HUMAN	PSMB6	0.18	-0.121	0.12	0.2	0.379	-0.241	-0.12	0.956	-0.00566	1.74	0.0508	0.356	-0.545	-0.0175	0.224	0.982	-0.0162	-0.0276	-0.0693	-0.761	0.167	-0.0685	-0.35	1.57	-0.362	0.00933	0.206	0.0262	0.132	-0.141
PSMD9_HUMAN	PSMD9	-0.0206	0.225	0.0489	-0.408	0.322	-0.139	-0.166	0.214	0.165	0.921	-0.234	0.141	-0.774	0.246	-0.387	1.15	-0.637	-0.421	-0.223	-0.856	0.559	0.27	-0.469	1.54	-0.0811	-0.328	-0.0321	-0.185	-0.282	-0.411
PSME1_HUMAN	PSME1	-0.0646	-0.176	-0.00871	0.0775	0.249	0.201	-0.116	0.727	-0.164	1.33	0.192	0.571	-0.493	-0.257	0.266	0.699	0.0544	-0.0743	-0.851	-0.181	0.156	0.138	-0.0811	1.22	-0.044	-0.173	0.196	-0.12	-0.0269	-0.185
PSME2_HUMAN	PSME2	-0.108	-0.0634	-0.172	0.196	0.439	0.316	0.18	0.92	-0.00069	1.01	0.103	0.632	-0.297	0.17	0.158	0.716	-0.467	-0.205	-0.143	-0.0119	-0.145	-0.144	-0.431	1.74	0.297	-0.15	0.235	-0.105	-0.124	-0.021
PT117_HUMAN	PET117	-0.169	-0.11	0.032	0.226	-0.0993	-0.31	-0.0243	0.249	-0.505	0.36	-0.0212	-0.939	-0.303	0.208	-0.278	-0.0488	-0.299	-0.022	0.0741	0.191	0.141	-0.389	0.0292	0.177	0.0947	0.146	-0.158	-0.111	0.237	0.0211
PTGDS_HUMAN	PTGDS	0.143	0.253	0.319	-0.205	-0.181	0.171	-0.0412	-0.31	0.263	-0.723	-0.224	0.105	0.154	-0.106	-0.0875	-0.194	0.0723	0.269	-0.194	0.382	-0.0352	0.255	-0.0725	-0.446	-0.378	0.171	0.0273	-0.116	0.00667	0.323
PTGR1_HUMAN	PTGR1	-0.395	0.52	0.0862	0.206	-0.156	-0.146	0.264	-0.0377	0.00794	0.263	-0.0441	0.704	-0.0539	0.309	-0.105	0.175	-0.197	-0.458	-0.0285	-0.144	0.525	-0.18	0.0566	0.189	0.257	-0.0515	0.136	-0.246	0.128	-0.0941
PTHR_HUMAN	PTHLH	0.0491	0.0101	-0.278	0.232	0.375	0.179	-0.291	-0.465	0.0603	-1	-0.259	-0.12	0.838	-0.00319	-0.376	0.165	-0.126	-0.364	0.118	-0.344	-1.06	-0.0801	-0.0178	-0.486	-1.02	0.417	0.0606	-0.126	0.152	0.124
PTK7_HUMAN	PTK7	-0.0203	0.0213	0.258	-0.0634	-0.022	0.177	-0.021	-0.227	0.0478	0.00819	-0.0473	0.177	0.137	-0.105	0.0705	-0.0345	0.0224	0.0521	-0.133	0.2	0.0993	0.198	0.0311	-0.276	-0.018	-0.00927	-0.00351	0.0125	-0.063	0.0867
PTN_HUMAN	PTN	0.339	-0.0208	0.0366	0.0864	-0.0686	-0.0131	0.0362	-0.605	-0.195	-0.32	-0.0331	-0.18	0.278	-0.0855	-0.505	-0.0572	0.14	0.272	0.456	-0.0533	0.148	0.0023	0.143	-0.679	-0.378	0.277	0.272	-0.161	-0.0169	0.0485
PTPA_HUMAN	PTPA	0.109	-0.284	-0.163	-0.319	0.0464	-0.054	0.0786	0.429	0.0829	0.839	0.303	0.707	-0.193	-0.121	0.16	0.658	0.199	0.345	-0.307	NA	0.504	-0.0591	-0.106	0.899	0.00118	-0.203	0.0731	-0.393	-0.313	-0.0306
PTPR2_HUMAN	PTPRN2	-0.0424	-0.0458	-0.149	0.152	-0.00938	0.138	-0.361	0.0937	-0.00222	0.062	0.241	-0.0578	0.261	-0.0285	-0.292	0.0335	-0.02	0.00489	0.00513	-0.00773	-0.322	-0.082	-0.0859	-0.0984	-0.397	0.304	-0.0242	-0.0563	0.261	0.0171
PTPRD_HUMAN	PTPRD	-0.0186	0.0213	-0.0706	0.037	-0.173	0.0556	0.0351	0.0199	-0.00545	-0.194	0.0502	-0.156	0.0411	0.125	-0.00269	-0.0122	0.103	-0.114	-0.0594	0.0958	-0.0352	-0.0976	0.000569	-0.12	-0.0734	0.115	-0.126	0.0505	0.0649	0.00689
PTPRF_HUMAN	PTPRF	-0.0175	-0.0281	-0.149	0.211	-0.0843	0.0616	-0.012	0.0888	-0.01	-0.0633	0.103	-0.0603	0.0858	0.000993	-0.00545	0.0637	-0.0164	-0.133	0.00084	-0.0196	-0.114	-0.144	-0.0036	-0.0897	-0.147	0.179	-0.034	0.0571	0.072	0.0478
PTPRG_HUMAN	PTPRG	-0.0124	-0.0221	-0.321	0.411	-0.00269	-0.127	0.0564	0.184	-0.0371	0.104	0.15	-0.385	0.12	0.315	-0.148	-0.0728	0.104	-0.182	0.22	0.016	-0.031	-0.146	-0.0363	-0.207	-0.328	0.376	0.0797	0.0265	0.311	0.015
PTPRJ_HUMAN	PTPRJ	0.102	-0.0594	0.0054	-0.0346	0.0734	0.171	-0.0234	-0.218	0.1	-0.239	-0.00138	0.204	-0.0147	-0.0847	-0.113	0.1	0.0641	0.0851	-0.188	0.0468	0.0273	0.167	-0.0838	-0.0848	-0.0456	0.0103	-0.015	-0.0623	-0.121	0.143
PTPRK_HUMAN	PTPRK	0.0903	0.101	-0.00274	0.0415	-0.0261	0.106	-0.0861	-0.0617	0.0188	-0.0792	0.137	-0.0808	0.056	0.0769	0.0474	-0.0951	0.141	0.00857	-0.0676	-0.141	-0.0483	0.00463	-0.0184	-0.141	-0.18	0.128	0.0581	0.0138	0.152	-0.104
PTPRM_HUMAN	PTPRM	-0.0992	0.0488	-0.0325	-0.028	0.0473	0.0789	0.0155	0.392	-0.153	0.259	0.0336	-0.098	-0.172	0.188	-0.0586	0.0793	0.154	-0.0894	-0.0783	-0.0722	0.2	-0.159	0.0115	0.0238	-0.0517	-0.0159	0.0832	-0.044	0.247	0.0512
PTPRN_HUMAN	PTPRN	0.0395	0.0422	-0.436	0.573	0.0964	-0.146	-0.248	0.263	-0.259	-0.176	0.219	-0.552	0.466	0.225	-0.224	0.0296	-0.0704	-0.129	0.299	0.154	-0.402	-0.167	-0.0308	-0.162	-0.299	0.504	0.00274	0.0683	0.394	0.0798
PTPRR_HUMAN	PTPRR	-0.0597	0.0294	0.233	-0.0373	-0.074	0.393	-0.434	0.0337	-0.138	0.28	-0.188	0.057	0.194	-0.273	-0.304	0.136	-0.0948	0.318	0.173	-0.142	-0.528	-0.233	-0.112	0.365	-0.522	0.316	0.0619	-0.0507	0.102	-0.0468
PTPRS_HUMAN	PTPRS	-0.0168	0.0308	0.00753	0.0435	-0.0388	0.145	-0.0378	-0.012	0.0136	-0.0628	-0.0694	-0.0887	0.00995	0.115	-0.000833	-0.0122	0.0499	0.026	0.0501	-0.0166	-0.0267	-0.034	-0.0284	-0.0833	-0.015	0.0354	-0.122	0.0116	0.0738	-0.00609
PTPRT_HUMAN	PTPRT	0.1	0.109	-0.296	0.193	-0.0405	0.0847	-0.175	-0.00141	-0.0892	-0.134	0.0819	-0.0572	-0.00808	0.0843	0.0807	0.118	0.112	-0.0442	-0.0781	-0.386	-0.101	-0.23	-0.126	-0.115	-0.399	0.282	0.108	-0.0647	0.186	-0.188
PTPRU_HUMAN	PTPRU	-0.028	-0.0361	0.0226	-0.116	0.144	0.346	0.00222	-0.175	-0.0648	0.0791	0.123	0.0763	0.0601	-0.27	-0.141	-0.00411	-0.0678	0.159	-0.149	-0.129	0.0231	0.284	-0.0104	0.127	0.143	-0.273	0.0071	-0.00619	-0.227	-0.0791
PTPRZ_HUMAN	PTPRZ1	0.0185	0.137	0.113	0.0222	-0.111	-0.00228	-0.0128	-0.116	-0.0267	0.00752	-0.0504	-0.147	0.0976	0.155	0.108	-0.108	0.0928	0.0521	0.134	0.0242	-0.144	-0.0312	0.0856	-0.0988	-0.0911	0.0817	-0.0173	0.0337	0.183	0.0811
PUR9_HUMAN	ATIC	0.0977	-0.338	-0.167	-0.233	0.669	0.0622	-0.577	0.962	-0.411	1.2	0.017	0.78	-0.207	0.0415	0.238	0.924	-0.329	-0.51	-0.101	-0.156	-0.0296	0.952	0.0528	0.992	0.271	-1.3	0.225	-0.143	-0.875	0.197
PURA_HUMAN	PURA	0.101	-0.602	-0.175	0.206	0.605	0.0148	-0.339	1.28	-0.352	2.48	-0.12	0.872	-0.301	1.19	0.964	1.12	-0.27	-0.0332	-0.156	-0.4	0.284	0.0175	-0.185	2.44	0.256	-0.121	0.456	-0.24	0.166	-0.176
PVR_HUMAN	PVR	0.0319	0.139	0.0732	-0.00516	0.0329	0.176	-0.0639	-0.14	0.0934	-0.208	-0.081	-0.214	0.0892	0.208	0.0241	-0.0428	-0.0797	0.0897	-0.0213	-0.0432	-0.0941	-0.257	0.101	-0.258	-0.0392	0.0693	0.0317	-0.177	0.221	-0.0481
PXDC2_HUMAN	PLXDC2	0.0558	0.0934	0.00784	-0.0653	-0.0491	0.0989	0.0547	-0.16	0.0923	-0.0924	-0.205	-0.139	0.0535	0.211	0.00808	-0.206	-0.202	-0.1	0.0249	0.15	0.128	-0.15	-0.0824	-0.0188	-0.141	-0.0552	-0.26	0.0705	-0.108	0.0864
PXDN_HUMAN	PXDN	-0.0185	-0.0235	0.398	-0.355	0.0969	0.0142	0.0801	-0.332	0.106	-0.207	-0.192	0.089	0.1	-0.246	0.00339	-0.215	-0.31	0.279	-0.131	0.000705	-0.267	0.269	-0.00544	-0.2	0.111	0.088	-0.0669	0.0433	-0.394	0.157
PYGM_HUMAN	PYGM	-0.0416	-0.144	0.217	-0.485	0.00458	0.168	-0.00973	-0.24	0.11	0.23	-0.226	-0.332	-0.337	0.204	0.461	-0.0403	-0.191	-0.253	-0.236	-0.249	-0.0452	0.0933	-0.0266	0.401	0.138	-0.387	0.318	-0.11	-0.193	-0.0676
PZP_HUMAN	PZP	-0.182	0.0982	0.437	-0.207	0.513	1.92	-0.119	-0.0575	-0.0242	1.44	-0.273	-0.652	-0.583	1.6	0.203	-0.108	0.799	0.0685	-0.354	0.75	-0.421	2.22	0.424	0.86	-0.0906	-0.317	-0.417	-0.0408	-0.444	0.957
QCR9_HUMAN	UQCR10	-0.129	-0.129	0.334	-0.325	0.147	0.113	0.0369	0.0223	-0.0705	0.218	-0.124	0.0311	-0.159	-0.149	-0.292	0.0382	0.0371	0.554	0.0555	-0.236	-0.205	-0.00758	0.392	0.172	-0.0948	-0.147	-0.179	0.0243	-0.00801	0.024
QOR_HUMAN	CRYZ	-0.0718	-0.042	0.201	-0.439	0.0822	0.437	-0.307	0.00993	-0.232	0.418	0.101	-0.203	0.194	-0.0197	0.366	-0.223	-0.236	-0.254	-0.136	0.55	0.0289	0.0883	-0.389	0.0542	0.144	-0.0537	0.258	-0.31	-0.11	0.0619
QPCT_HUMAN	QPCT	-0.078	-0.168	-0.313	0.295	-0.0346	-0.105	-0.157	0.182	-0.291	0.169	-0.0478	0.0161	0.306	0.0867	-0.274	-0.0887	0.109	-0.0316	0.127	-0.199	-0.0689	0.16	-0.0252	-0.038	-0.245	0.444	0.184	0.116	-0.127	0.1
QPCTL_HUMAN	QPCTL	-0.102	0.0801	-0.0689	-0.0863	-0.194	-0.074	-0.0233	0.161	-0.31	-0.071	-0.0397	0.0163	0.198	0.0728	0.0914	0.125	0.0169	-0.459	-0.0121	-0.105	0.069	0.114	-0.1	-0.0587	0.00507	0.131	-0.0128	0.00363	-0.082	-0.364
QSOX1_HUMAN	QSOX1	0.0376	0.128	0.232	-0.169	-0.113	-0.0328	0.014	-0.196	0.149	-0.152	-0.127	0.218	0.111	-0.0441	-0.0216	0.113	0.0128	0.0487	-0.228	-0.011	-0.072	0.172	0.0468	-0.0121	0.134	-0.0423	-0.174	0.0835	-0.118	-0.00403
QSOX2_HUMAN	QSOX2	-0.0697	-0.0102	0.0737	-0.0312	-0.12	-0.206	0.0661	0.13	-0.34	0.182	0.0526	-0.295	-0.243	0.00639	-0.0714	-0.222	-0.16	0.224	0.338	0.0722	-0.332	-0.253	-0.00304	-0.0174	0.102	0.00324	-0.161	0.231	0.238	0.39
R4RL1_HUMAN	RTN4RL1	0.0789	-0.0741	-0.429	0.274	-0.121	0.0167	-0.0581	0.0213	-0.116	0.112	0.201	-0.17	0.397	-0.000194	-0.0273	0.159	0.122	-0.321	-0.0107	-0.144	-0.132	-0.125	-0.101	0.0375	-0.353	0.41	0.157	0.0172	0.229	-0.146
R4RL2_HUMAN	RTN4RL2	0.0687	0.0971	-0.323	0.144	0.0501	0.234	-0.216	-0.196	0.144	-0.415	-0.147	0.122	0.326	-0.334	0.152	0.159	0.213	-0.0591	-0.174	-0.309	-0.178	0.0204	-0.116	-0.212	-0.563	0.439	0.187	-0.0662	0.0587	-0.147
RAB10_HUMAN	RAB10	0.333	0.113	0.0387	0.23	0.245	-0.0903	-0.259	0.175	0.211	0.552	-0.027	-0.152	0.069	0.319	-0.0817	0.147	-0.295	0.0446	0.0982	-0.0805	-0.0503	-0.297	-0.17	0.353	0.0409	0.171	-0.0109	0.051	0.076	0.132
RAB14_HUMAN	RAB14	-0.15	-0.111	-0.0539	-0.0107	0.246	0.105	0.175	0.145	-0.0253	0.625	-0.208	0.385	-0.0705	-0.403	-0.0954	0.135	-0.139	0.236	-0.238	-0.26	-0.435	-0.0182	0.0881	0.468	-0.164	-0.156	0.0834	7.01e-05	-0.131	-0.114
RAB1A_HUMAN	RAB1A	-0.0157	-0.0898	0.127	-0.0751	-0.0117	-0.181	-0.217	0.227	-0.136	0.642	-0.271	-0.101	0.155	0.0762	0.231	0.11	0.0663	0.0961	0.353	-0.093	-0.23	-0.0385	-0.0427	0.306	0.0643	0.0873	-0.167	0.0382	0.194	-0.0118
RAB4A_HUMAN	RAB4A	-0.148	-0.488	-0.229	0.0726	-0.918	0.00704	0.195	-0.357	0.0181	-0.306	0.0724	-0.948	-0.262	-0.0477	0.33	-0.153	0.00994	-0.433	0.236	0.0981	0.42	-0.225	0.207	0.211	0.0814	-0.0957	0.125	-0.0816	0.213	-0.314
RAB4B_HUMAN	RAB4B	-0.137	-0.14	0.00177	0.163	-0.0326	-0.322	0.0171	0.112	-0.068	0.225	0.24	-0.0167	0.00224	-0.026	0.0797	-0.11	-0.0975	-0.277	0.113	0.0352	-0.0906	-0.319	0.0525	0.181	-0.167	0.135	-0.0373	-0.0161	0.134	-0.116
RAB6A_HUMAN	RAB6A	0.071	-0.0656	-0.252	0.061	-0.00325	-0.355	0.306	0.259	-0.00707	0.392	0.279	-0.00356	0.039	-0.173	0.00192	-0.164	-0.418	-0.0576	0.238	0.145	-0.0106	-0.524	-0.077	0.212	-0.118	0.215	-0.0678	-0.0724	0.0793	0.0642
RABP1_HUMAN	CRABP1	-0.582	-0.0714	-0.204	-0.143	-0.0293	-0.221	0.137	0.336	0.709	0.936	-0.186	0.00377	-0.461	0.244	1.82	0.111	-0.36	-0.00363	0.533	-0.101	1.09	0.444	-0.188	1.12	0.292	-0.00717	0.304	-0.334	-0.0646	-0.152
RAC1_HUMAN	RAC1	-0.115	-0.083	0.0687	-0.217	-0.277	0.125	-0.0717	-0.0868	0.142	0.182	-0.0553	0.248	-0.0511	-0.188	0.252	-0.154	-0.0766	0.326	0.0894	-0.0693	-0.118	-0.237	0.0388	0.0599	0.262	0.0835	-0.229	0.0244	-0.0116	0.0815
RADI_HUMAN	RDX	-0.0526	-0.0125	-0.154	-0.0477	0.0084	-0.213	0.138	0.0435	0.0161	0.452	-0.106	0.0341	-0.197	-0.111	0.287	0.0319	0.398	-0.195	-0.143	0.0662	0.196	-0.103	-0.0304	0.361	0.0451	-0.174	-0.0491	0.0271	-0.188	0.0199
RAN_HUMAN	RAN	0.0241	-0.313	-0.0478	0.383	0.571	-0.0838	-0.214	1.15	-0.109	2.12	-0.178	0.606	-0.541	0.337	-0.00203	1.36	-0.402	-0.0527	-0.094	-0.0754	0.319	0.131	-0.0132	1.83	0.386	-0.217	0.343	-0.221	-0.302	0.00583
RARR2_HUMAN	RARRES2	-0.0594	0.0448	0.154	-0.0517	-0.358	-0.216	0.102	-0.0505	0.0328	0.0353	-0.222	-0.0102	-0.113	-0.111	0.0739	-0.0279	-0.38	0.198	0.219	0.103	-0.0572	0.241	-0.159	-0.183	0.0242	0.0613	-0.00906	0.169	-0.385	0.0279
RBSK_HUMAN	RBKS	0.133	-0.272	-0.051	0.125	-0.036	-0.215	-0.0224	0.16	0.225	0.0757	-0.193	0.0709	0.00442	-0.339	0.0291	-0.0114	0.13	0.147	-0.0066	-0.514	0.126	0.0726	0.0735	0.368	-0.126	-0.177	-0.0569	-0.0892	-0.423	0.0854
RCN1_HUMAN	RCN1	-0.0404	0.0609	-0.0573	0.189	-0.308	-0.319	0.189	0.0173	-0.31	0.0334	-0.0125	-0.456	-0.043	0.165	-0.0981	-0.0821	-0.227	0.0282	0.295	0.166	0.0629	-0.0602	-0.00355	-0.183	0.155	0.155	-0.196	0.0231	0.301	0.0177
RCN2_HUMAN	RCN2	-0.0917	0.0299	-0.218	0.299	-0.0179	-0.268	-0.0115	0.262	-0.175	0.43	-0.0047	0.117	-0.154	0.187	-0.416	0.00556	-0.0998	0.206	0.104	0.127	-0.0798	-0.0128	-0.0277	-0.0749	0.032	-0.238	0.0988	0.101	0.288	-0.155
RD23A_HUMAN	RAD23A	1.73	-0.591	0.147	-0.00645	0.2	-0.245	-0.158	0.946	-0.17	2.13	2.93	0.801	-1.01	-0.535	-0.23	1.45	-0.628	-0.941	-0.229	-0.17	3.71	-0.0201	-0.555	1.86	0.121	-0.0025	-0.156	-0.532	0.105	-0.652
RD23B_HUMAN	RAD23B	-0.174	-0.184	-0.264	0.409	-0.024	-0.0142	0.151	0.557	-0.188	0.481	0.0527	-0.173	-0.246	0.501	-0.24	0.259	-0.293	-0.252	0.181	0.289	0.108	-0.244	-0.23	0.468	-0.0097	0.25	0.0955	-0.106	0.32	-0.0753
RECK_HUMAN	RECK	0.0317	0.195	-0.0488	-0.121	-0.00143	-0.00748	0.197	-0.0225	-0.0713	0.0667	-0.0143	0.28	-0.0809	0.22	-0.0273	0.15	-0.0628	0.00433	-0.0514	0.0602	0.182	0.0288	0.0135	-0.0802	0.0778	-0.175	0.0171	0.166	-0.0311	-0.0228
RELL1_HUMAN	RELL1	-0.0253	0.357	0.631	-0.593	0.0143	0.424	-0.155	-0.275	0.302	-0.275	-0.112	0.457	0.533	-0.493	-0.0992	0.248	0.408	0.0787	-0.0343	0.049	0.0343	0.511	0.0631	-0.25	-0.122	-0.16	-0.0895	-0.0455	-0.249	0.452
RELN_HUMAN	RELN	-0.0479	-0.164	0.0419	0.0395	-0.312	-0.0612	0.0536	0.0605	-0.258	0.308	0.128	-0.241	-0.185	0.0544	0.0704	-0.0805	0.211	0.148	0.296	-0.419	-0.22	-0.512	0.134	-0.0228	-0.0961	0.0482	0.0794	0.00625	0.338	-0.213
RENR_HUMAN	ATP6AP2	-0.137	-0.2	-0.229	0.442	0.041	-0.111	-0.123	0.0346	-0.59	0.212	0.315	-0.433	0.0636	0.256	-0.0271	0.181	-0.0957	-0.103	0.388	-0.131	0.215	-0.456	-0.00548	-0.242	-0.0114	0.369	0.00428	0.138	0.305	-0.241
RET3_HUMAN	RBP3	0.816	0.383	-0.401	0.0752	-0.468	-0.783	-0.139	-0.368	-0.261	0.531	1.03	0.134	-0.213	-0.092	-0.16	-0.301	-0.0302	0.437	0.115	-0.551	0.627	0.0191	0.271	-0.692	0.331	-0.367	-0.147	0.106	0.683	-0.0345
RET4_HUMAN	RBP4	0.178	-0.0315	-0.0528	-0.231	0.532	0.505	0.381	-0.0957	0.149	-0.214	0.353	0.967	-0.363	-0.252	0.0429	-0.0235	-0.237	0.071	0.0279	0.317	0.866	0.449	-0.101	-0.00848	0.809	-0.0742	-0.178	0.147	-0.23	-0.144
RFNG_HUMAN	RFNG	0.0373	0.131	-0.187	0.0521	-0.207	-0.233	-0.299	-0.161	-0.0361	-0.732	0.084	-0.0428	-0.0348	-0.675	-0.000706	-0.282	0.00107	-0.0608	0.0397	0.24	-0.321	0.134	0.00566	-0.5	-0.0122	0.0482	-0.00879	-0.0696	0.0614	0.046
RGMA_HUMAN	RGMA	0.167	0.0204	-0.0937	0.305	-0.18	-0.071	-0.16	0.182	-0.11	0.0291	0.167	-0.0781	0.247	-0.036	0.0042	-0.00826	-0.0834	0.0321	0.22	-0.0726	0.179	0.0445	-0.0565	-0.17	-0.217	0.139	-0.0621	-0.0439	0.000891	0.526
RGMB_HUMAN	RGMB	0.00669	-0.129	-0.0569	0.0396	0.0334	0.124	-0.0536	0.0346	0.00898	0.304	0.0406	-0.231	0.218	-0.132	-0.219	-0.000221	-0.0281	0.0191	0.047	0.0518	-0.102	0.028	-0.121	0.221	-0.279	0.0932	-0.0316	-0.093	0.0421	-0.0531
RGN_HUMAN	RGN	0.00251	0.183	0.0897	-0.00266	0.0431	0.0619	-0.105	-0.149	0.0379	0.00237	-0.0561	0.00131	0.0869	-0.115	0.14	-0.0128	0.00272	0.387	-0.0774	0.049	-0.0392	0.05	-0.225	-0.0848	0.0152	0.0945	-0.0292	0.0208	0.0155	-0.0243
RGS10_HUMAN	RGS10	0.078	-0.0863	0.0216	0.0347	-0.238	-0.0189	-0.0167	0.0709	-0.146	0.408	0.197	-0.0152	-0.0074	0.0191	0.00366	0.0791	-0.225	-0.455	0.129	0.176	-0.185	0.304	0.125	0.235	-0.0507	-0.00358	-0.164	0.202	-0.0532	0.0124
RHG36_HUMAN	ARHGAP36	-0.0928	-0.2	0.155	-0.198	-0.163	0.0625	-0.25	-0.246	-0.0423	-0.00449	0.0802	-0.0639	0.132	0.314	0.114	-0.156	-0.12	-0.000868	-0.128	0.304	0.149	-0.169	-0.0778	0.14	0.1	0.109	0.159	-0.135	-0.276	0.00735
RINI_HUMAN	RNH1	-0.266	-0.0352	0.0229	0.0641	0.313	-0.154	-0.201	-0.132	0.0853	1.2	0.168	0.252	0.0937	0.16	0.214	0.129	-0.702	-0.375	-0.138	0.393	0.342	-0.348	-7.89e-05	0.872	-0.126	-0.13	-0.185	0.033	-0.22	-0.307
RISC_HUMAN	SCPEP1	0.0476	0.237	0.109	-0.686	-0.424	0.534	0.0468	-0.506	0.197	-0.315	-0.386	0.148	-0.284	-0.578	-0.0603	0.19	0.151	0.19	-0.548	-0.416	0.0987	0.48	-0.214	-0.233	-0.0563	0.279	-0.0143	-0.462	-0.642	0.172
RL40_HUMAN	UBA52	-0.0373	-0.276	-0.0624	0.189	-0.0929	0.00457	0.0707	0.2	0.133	0.305	-0.183	-0.0195	0.149	0.162	-0.0272	-0.212	-0.123	-0.103	-0.376	0.189	-0.0231	-0.161	-0.0575	0.0761	-0.453	0.149	0.136	-0.286	0.0117	0.0418
RM33_HUMAN	MRPL33	-0.154	0.392	-0.232	0.0425	-0.226	0.0357	0.0944	0.251	0.155	0.125	-0.18	0.0631	-0.343	-0.369	0.0532	0.0712	0.0233	0.125	-0.0698	0.0768	-0.347	0.0278	0.0797	0.0462	0.179	0.11	-0.191	0.179	-0.39	0.139
RMD1_HUMAN	RMDN1	0.0893	0.128	0.227	-0.133	-0.0849	-0.00736	0.315	0.0415	-0.056	-0.129	0.179	-0.0412	-0.0179	0.0184	-0.527	-0.461	-0.231	-0.00751	0.002	0.0592	0.0227	-0.257	0.0717	0.337	-0.119	0.122	-0.082	-0.153	-0.295	0.172
RMD3_HUMAN	RMDN3	0.133	-0.0287	-0.0764	0.251	-0.241	-0.353	0.0244	-0.218	0.00593	0.326	-0.0497	0.124	0.00926	0.114	-0.169	0.104	-0.0319	-0.254	-0.215	-0.108	0.15	-0.298	0.0241	0.276	0.0387	-0.0434	-0.122	0.0231	0.0513	-0.0407
RNAS1_HUMAN	RNASE1	-0.12	-0.0268	0.231	-0.302	-0.15	0.167	-0.114	-0.228	0.0787	-0.152	-0.182	-0.207	0.146	0.0149	-0.711	-0.0461	-0.483	-0.312	-0.827	0.439	-0.0991	0.212	-0.162	-0.0809	0.0171	-0.0549	0.357	-0.176	-0.451	-0.12
RNAS2_HUMAN	RNASE2	0.00874	-0.0422	-0.136	-0.18	0.247	0.112	0.0663	0.342	-0.000691	0.811	0.325	0.317	-0.574	0.0496	-0.195	0.0975	-0.0484	-0.397	-0.25	0.0127	0.19	0.575	-0.259	0.612	0.0518	-0.531	-0.101	-0.329	-0.553	-0.0754
RNAS4_HUMAN	RNASE4	0.00932	0.0135	0.244	-0.144	-0.12	0.0651	0.219	-0.155	0.153	-0.473	-0.0114	-0.0174	-0.13	0.0908	0.252	-0.071	0.0782	0.491	-0.131	-0.0744	0.222	0.182	-0.207	-0.146	-0.0246	-0.0587	0.117	-0.028	-0.298	0.187
RNAS6_HUMAN	RNASE6	0.134	0.388	0.0186	0.0491	-0.148	-0.153	0.0127	-0.145	0.0587	-0.688	-0.234	0.16	-0.0405	2.33e-05	0.0754	0.0201	0.144	0.1	-0.399	-0.0984	-0.0375	0.407	0.0863	-0.183	0.116	-0.0579	-0.349	-0.0405	-0.0743	0.151
RNF11_HUMAN	RNF11	0.111	0.318	-0.407	0.267	-0.1	0.0512	-0.0825	0.00989	-0.849	-0.349	0.38	-0.684	0.242	-0.0252	0.0787	0.0469	-0.317	-0.3	0.3	-0.0257	-0.389	-0.513	-0.134	0.0974	0.166	0.262	-0.0754	-0.0303	0.312	-0.159
RNF13_HUMAN	RNF13	0.0544	0.111	0.0817	-0.133	0.0763	-0.197	-0.0533	0.201	0.348	0.0721	0.0979	0.36	0.17	-0.251	0.12	0.122	0.00821	-0.159	-0.284	-0.0583	0.099	-0.0212	0.0253	0.566	-0.19	-0.216	-0.19	-0.0916	-0.0348	-0.0292
RNT2_HUMAN	RNASET2	0.0554	0.23	0.245	-0.134	-0.0775	-0.37	-0.0406	-0.206	0.0957	-0.27	0.00244	-0.0404	0.0657	-0.194	0.0921	0.0283	0.409	-0.0634	-0.31	-0.221	0.154	0.159	-0.0418	-0.269	0.045	0.272	-0.0784	0.071	0.00711	-0.267
ROA2_HUMAN	HNRNPA2B1	-0.401	-0.337	-0.433	0.122	0.553	-0.492	-0.263	0.617	-1.15	0.474	0.139	0.277	-0.291	0.613	0.409	-0.467	-0.722	-0.178	-0.387	-0.305	0.0401	0.217	0.021	0.759	0.497	0.0305	-0.46	-0.0266	-0.234	-0.288
ROBO1_HUMAN	ROBO1	-0.112	0.0607	-0.0144	-0.0389	-0.101	0.0929	-0.0865	-0.0992	-0.0368	0.197	0.0507	-0.212	-0.0229	0.0488	-0.0299	-0.056	-0.0311	0.104	0.196	0.00806	-0.109	-0.114	0.0512	-0.137	-0.192	0.131	0.0692	-0.064	0.178	0.0262
ROBO2_HUMAN	ROBO2	0.0497	0.00728	-0.101	0.113	-0.141	0.163	-0.179	-0.00636	-0.0544	0.0843	-0.133	-0.0104	0.0123	-0.12	-0.00749	0.0354	0.1	0.188	0.0654	-0.194	-0.12	0.0748	0.0269	-0.0875	-0.196	0.214	-0.0111	-0.0609	0.0925	0.0908
ROBO4_HUMAN	ROBO4	-0.0305	-0.211	0.386	-0.178	0.0233	0.196	0.346	-0.147	0.00727	0.275	0.178	-0.0203	0.152	-0.00575	0.0802	-0.225	-0.18	-0.344	0.186	0.0727	0.546	0.0282	0.274	0.0575	0.383	-0.133	-0.0621	0.272	-0.118	-0.11
ROR1_HUMAN	ROR1	0.168	0.0664	0.33	-0.222	0.104	0.00576	0.117	-0.372	0.112	-0.305	-0.0983	-0.217	-0.175	-0.125	0.142	-0.0889	-0.0943	0.262	-0.0903	0.0807	0.241	0.0348	-0.207	-0.155	0.104	0.0481	-0.0539	0.112	-0.105	-0.0268
RP3A_HUMAN	RPH3A	-0.0612	-0.0759	-0.528	0.0503	-0.0162	0.137	0.0694	0.066	-0.16	-0.235	0.00674	-0.00378	0.483	0.22	-0.372	-0.0991	0.176	-0.216	0.341	0.0962	-0.279	0.0585	0.0267	-0.133	-0.0699	0.298	0.0431	0.273	0.335	0.0835
RPIA_HUMAN	RPIA	0.198	-0.529	0.369	0.284	0.677	0.11	-0.136	1.14	0.098	2.8	-0.572	0.886	-0.301	-0.877	-0.486	2.29	-0.224	-0.116	0.151	-0.449	0.205	0.0535	-0.386	2.76	0.0864	-0.427	0.545	-0.171	-0.0335	-0.368
RPN2_HUMAN	RPN2	-0.241	-0.0686	0.155	-0.158	0.176	0.0998	0.064	0.0178	-0.129	0.325	-0.241	-0.235	-0.0548	-0.359	-0.233	-0.21	0.173	-0.0368	0.204	0.0264	-0.0978	0.175	0.139	0.217	-0.023	-0.0337	-0.391	0.0268	-0.114	-0.0293
RTBDN_HUMAN	RTBDN	-0.24	-0.437	0.00536	0.194	0.0301	0.00937	0.14	-0.238	0.00993	0.252	-0.0716	-0.312	-0.226	0.205	0.251	0.0763	-0.144	-0.0919	0.167	0.469	0.563	0.0798	0.215	0.279	0.159	-0.125	-0.192	-0.191	0.0995	0.12
RTN1_HUMAN	RTN1	0.174	-0.156	0.141	-0.0169	-0.0885	0.198	-0.0377	0.0193	0.165	-0.208	-0.154	-0.125	0.0593	-0.0499	-0.0155	0.0869	-0.239	0.146	0.139	-0.133	-0.085	-0.132	0.172	0.00389	-0.123	0.222	-0.127	0.139	0.0716	0.0997
RTN4R_HUMAN	RTN4R	0.0756	-0.0106	-0.044	0.254	-0.0906	0.0899	0.0183	-0.224	0.0997	-0.0817	0.201	-0.149	0.0671	0.151	0.167	0.0735	0.23	-0.0715	0.125	-0.103	-0.171	-0.195	-0.0661	-0.0637	-0.158	0.198	0.0204	0.0149	0.292	-0.145
S100B_HUMAN	S100B	-0.155	-0.124	-0.387	0.229	-0.0627	-0.248	-0.036	0.467	-0.0129	0.964	0.198	0.0405	0.096	0.209	0.195	0.0936	0.237	-0.256	0.018	-0.424	0.222	-0.0733	0.016	0.671	-0.145	-0.155	-0.00796	0.0106	0.224	-0.198
S10A4_HUMAN	S100A4	-0.195	-0.331	-0.163	0.331	0.548	-0.184	-0.148	0.377	-0.341	2.78	0.326	0.509	-0.491	0.724	-0.146	1.25	-0.981	-0.553	-0.444	-0.409	0.142	-0.471	-0.189	2.36	0.123	-0.695	0.2	-0.356	-0.47	-0.514
S10A6_HUMAN	S100A6	0.038	-0.268	0.00828	0.0261	0.264	-0.286	0.401	0.548	-0.254	1.83	-0.119	0.0874	-0.145	1.26	0.489	0.531	-0.506	-0.478	-0.152	-0.123	0.901	-0.114	-0.229	1.57	0.0596	-0.375	0.15	-0.255	0.0448	-0.158
S10A9_HUMAN	S100A9	-0.444	-0.186	0.683	0.133	0.61	-0.141	-0.000899	0.742	-0.244	1.66	0.528	1.65	-0.566	-0.297	-0.215	0.399	-0.245	0.261	-0.712	-0.22	0.706	0.535	0.425	1.5	0.639	-0.688	-0.13	-0.105	-0.264	-0.225
S10AB_HUMAN	S100A11	-0.179	-0.173	-0.588	0.345	0.475	-0.419	0.0284	0.573	-0.192	0.513	0.129	0.0572	-0.158	0.725	0.599	-0.259	-0.133	-0.571	-0.163	0.0944	0.693	-0.242	0.216	0.649	0.604	-0.0533	-0.226	0.048	0.192	-0.226
S12A2_HUMAN	SLC12A2	-0.0947	-0.102	0.0113	-0.178	-0.0641	-0.0245	0.0308	0.11	-0.00165	0.347	-0.0805	0.0647	-0.185	0.204	0.0868	0.032	0.0767	-0.063	-0.0365	-0.153	0.0352	0.054	-0.0817	0.274	-0.0299	0.00928	0.0123	0.14	-0.268	-0.0209
S12A5_HUMAN	SLC12A5	-0.298	0.165	-0.251	0.0961	-0.323	0.19	-0.0866	0.0103	0.0537	-0.241	0.0515	-0.552	0.291	0.106	-0.00335	-0.223	0.0257	0.0994	0.199	0.00834	-0.394	-0.28	-0.0432	-0.0872	-0.186	0.0713	-0.0712	0.054	0.00853	0.304
S1PR1_HUMAN	S1PR1	0.0573	0.0321	-0.0117	0.061	0.152	-0.215	-0.426	0.385	-0.0108	0.994	-0.147	-0.039	0.189	-0.101	-0.382	0.533	-0.23	0.0352	0.115	0.0134	-0.291	-0.205	-0.374	1.25	-0.022	-0.403	0.103	-0.436	-0.344	-0.46
S38AA_HUMAN	SLC38A10	0.0313	0.0531	0.102	0.0937	-0.104	0.0513	0.151	0.0326	-0.0877	0.0103	0.00778	0.0192	0.0331	0.15	-0.119	-0.0362	-0.0967	0.0287	-0.0178	0.0162	-0.0217	-0.0171	0.0195	0.0864	-0.0263	0.0744	-0.0937	-0.131	-0.125	0.133
S39A6_HUMAN	SLC39A6	-0.233	-0.111	-0.09	0.0433	-0.0117	-0.00925	-0.0979	0.0204	0.174	-0.0154	0.169	-0.107	-0.0107	0.0922	0.0635	0.0167	-0.2	-0.0241	0.0783	0.0313	-0.00698	0.0167	-0.104	-0.172	-0.07	0.122	-0.0188	0.0296	0.206	-0.0064
S39AA_HUMAN	SLC39A10	0.125	0.182	-0.145	0.246	0.0527	0.362	-0.329	-0.0011	0.0175	-0.379	-0.11	-0.0488	0.316	-0.104	-0.101	0.371	-0.205	-0.0194	0.133	-0.0444	-0.216	-0.053	-0.0438	-0.179	-0.349	0.435	0.064	0.178	-0.0467	0.111
S39AC_HUMAN	SLC39A12	0.229	0.212	0.593	-0.525	-0.124	-0.093	-0.417	-0.318	0.619	-0.0208	-0.205	0.601	0.349	-0.66	0.305	0.232	0.0412	0.713	-0.256	-0.0939	-0.342	0.38	-0.0434	-0.0793	-0.353	0.156	-0.555	0.329	-0.464	0.194
SAA1_HUMAN	SAA1	-0.303	0.348	-0.00517	-0.265	-0.273	0.124	0.0149	-0.268	0.264	0.341	-0.054	-0.138	-0.213	-0.162	0.369	0.228	-0.159	-0.0517	-0.332	-0.145	-0.163	0.105	0.158	0.247	-0.0839	0.0884	0.00539	-0.374	0.214	0.294
SAA4_HUMAN	SAA4	0.22	-0.0564	-0.473	-0.206	0.576	0.269	-0.202	-0.334	0.298	-0.0821	0.626	0.451	-0.396	0.249	-0.111	0.242	-0.438	-0.0036	-0.327	0.293	0.343	-0.0952	0.387	-0.405	0.513	-0.355	-0.159	0.175	-0.531	0.578
SAHH_HUMAN	AHCY	-0.0585	-0.225	0.339	0.178	0.549	-0.0472	-0.214	1.64	-0.162	1.93	0.317	0.383	-0.459	0.555	0.71	1.42	-0.185	-0.199	0.225	-0.108	0.418	-0.156	-0.183	2.07	0.0491	-0.179	0.451	-0.0218	0.0982	-0.0924
SAMP_HUMAN	APCS	-0.23	-1.03	0.0128	-0.0215	0.203	0.546	1.5	-0.34	-0.0578	0.45	0.374	1.33	-1.37	-0.0216	-0.615	-0.46	-0.944	-1.17	-0.0993	0.819	2.62	0.361	0.203	0.184	1.01	-0.726	-0.14	-0.418	-0.482	-0.179
SAP_HUMAN	PSAP	0.0472	0.169	0.0697	-0.084	-0.0371	-0.125	0.128	-0.218	0.021	-0.192	0.246	-0.124	0.112	0.164	0.0761	-0.149	0.12	-0.0735	0.0319	-0.0877	-0.26	0.0503	-0.0058	-0.186	-0.276	0.166	-0.023	0.141	-0.0468	0.0765
SAP3_HUMAN	GM2A	0.173	0.00575	-0.0731	0.274	-0.0465	-0.294	0.0226	-0.046	0.204	-0.139	0.0803	-0.272	0.196	0.258	-0.0286	-0.046	-0.164	-0.00018	0.372	0.325	0.0527	-0.113	0.0124	-0.214	0.00533	0.161	-0.00837	0.0891	0.444	-0.0768
SARAF_HUMAN	SARAF	0.0897	-0.0674	0.151	0.086	-0.0792	0.112	-0.05	-0.0323	0.0915	-0.123	0.0367	-0.0402	0.011	-0.114	0.0445	0.101	0.196	0.0478	-0.0082	0.104	-0.135	-0.0593	-0.00437	-0.173	-0.234	0.0407	0.0474	0.0334	0.0706	-0.11
SBP1_HUMAN	SELENBP1	0.0502	-0.215	-0.0197	-0.0694	-0.0255	0.0339	-0.101	0.552	0.00571	0.92	0.0739	-0.149	0.15	-0.181	-0.0212	0.534	0.189	-0.161	0.166	0.152	0.39	0.241	-0.0525	0.576	-0.175	-0.0582	0.19	-0.0902	-0.0465	-0.12
SBSN_HUMAN	SBSN	-0.136	0.0698	0.198	-0.606	0.613	-0.117	-0.224	-0.0539	0.272	-0.157	-0.21	0.432	0.059	-0.46	0.169	-0.214	0.0835	-0.128	0.22	-0.00316	0.278	-0.29	0.203	-0.396	-0.293	0.365	0.209	-0.461	0.442	-0.525
SCF_HUMAN	KITLG	0.0548	0.0423	-0.0852	-0.0126	-0.022	0.179	-0.0128	-0.256	0.213	-0.235	-0.355	-0.0245	-0.0363	-0.356	-0.324	0.473	-0.168	0.0603	-0.279	-0.0883	-0.504	-0.00424	-0.00918	0.123	-0.344	0.159	-0.255	0.0716	0.0421	0.0775
SCG1_HUMAN	CHGB	-0.00244	0.195	0.391	-0.144	-0.144	0.185	-0.14	-0.305	-0.204	-0.0915	0.0754	-0.586	0.0371	0.125	-0.0133	-0.404	0.00753	0.156	0.328	0.0114	-0.505	-0.231	0.16	-0.0132	-0.0865	-0.06	-0.389	0.0903	0.175	0.397
SCG2_HUMAN	SCG2	-0.0227	-0.0172	-0.122	0.79	0.376	-0.137	-0.174	0.335	-0.00491	-0.105	0.266	-0.444	0.381	0.438	-0.0904	-0.0142	-0.198	0.0597	0.522	0.236	-0.421	-0.2	0.125	-0.038	-0.0812	0.619	0.081	0.231	0.55	-0.00494
SCG3_HUMAN	SCG3	-0.0256	-0.0431	-0.161	0.632	-0.0197	0.122	-0.0245	0.0558	-0.273	0.145	0.0126	-0.454	0.351	0.451	0.134	-0.182	-0.0749	-0.104	0.515	0.159	-0.323	-0.114	0.252	-0.103	0.0175	0.479	0.00394	-0.0558	0.246	0.138
SCN1B_HUMAN	SCN1B	0.075	0.143	0.0397	0.0309	0.108	0.319	0.0468	-0.177	0.16	-0.367	-0.196	-0.115	0.398	0.0401	0.251	-0.198	0.0231	0.192	0.102	-0.135	-0.23	-0.295	0.0261	-0.362	-0.231	0.134	-0.0383	0.0162	0.106	-0.254
SCN2B_HUMAN	SCN2B	-0.0593	-0.00428	-0.00677	0.0408	-0.225	0.167	-0.142	-0.0804	-0.251	0.11	-0.0231	-0.272	0.0396	-0.221	0.0603	0.151	0.176	0.0116	0.162	-0.0264	-0.334	0.262	0.0855	-0.075	-0.215	-0.0605	0.00235	0.069	-0.16	0.0795
SCN3B_HUMAN	SCN3B	-0.0847	0.151	-0.158	0.438	-0.0358	0.269	-0.374	0.0233	0.0644	0.199	0.1	-0.0658	0.667	0.16	-0.0296	0.302	-0.21	-0.105	0.0762	-0.061	-0.0194	0.259	-0.0195	-0.0492	-0.249	0.558	0.168	-0.154	0.382	-0.174
SCN4B_HUMAN	SCN4B	0.0584	0.24	-0.196	0.214	-0.0631	-0.204	0.112	0.0993	-0.336	0.162	0.142	-0.391	-0.133	0.264	-0.0302	-0.128	0.213	-0.23	0.176	0.169	-0.0709	-0.0567	0.396	-0.212	0.0233	0.00597	-0.293	0.176	0.218	-0.261
SCRG1_HUMAN	SCRG1	-0.0433	0.107	0.0155	0.542	0.14	-0.41	-0.645	0.066	0.132	-0.764	0.19	-0.837	-0.113	0.452	-0.308	-0.0175	-0.368	0.0754	0.365	0.418	0.251	-0.566	0.515	-0.498	0.252	-0.146	0.272	-0.183	0.724	-0.0398
SCRN1_HUMAN	SCRN1	-0.109	0.219	0.16	-0.153	-0.0249	0.137	0.0793	0.215	0.109	-0.0728	-0.0789	0.0923	0.0212	-0.114	0.223	0.551	-0.218	-0.0524	-0.137	-0.0507	0.0319	0.106	0.0212	0.656	-0.0783	-0.0875	0.00146	-0.014	-0.042	-0.151
SCTM1_HUMAN	SECTM1	-0.0812	0.252	0.222	0.0458	0.1	0.0725	0.163	-0.101	0.0691	-0.0929	0.0536	-0.0236	0.141	-0.0399	-0.00936	-0.226	-0.0953	0.106	-0.176	-0.186	0.105	-0.232	-0.0725	-0.0197	0.0897	-0.0852	-0.218	-0.158	0.0836	0.165
SDC2_HUMAN	SDC2	0.304	0.0617	-0.402	0.169	-0.717	-0.341	0.00333	0.129	-0.193	-0.104	-0.161	-0.439	0.24	0.111	0.158	-0.0477	0.192	0.244	0.51	0.0598	-0.268	0.0701	0.509	-0.0704	0.465	-0.247	-0.168	-0.0768	0.312	-0.0861
SDC3_HUMAN	SDC3	-0.0572	-0.0863	0.363	-0.117	0.109	0.118	0.274	-0.116	0.158	-0.135	-0.153	0.13	0.128	-0.0991	0.0868	-0.0623	0.258	0.0932	-0.031	-0.166	0.578	0.191	-0.000491	-0.039	-0.0205	-0.00964	0.132	-0.209	-0.245	0.0776
SDC4_HUMAN	SDC4	-0.393	0.0982	0.0188	-0.176	-0.038	0.0566	0.0954	0.0918	0.14	-0.0342	-0.182	0.19	-0.0117	-0.346	0.206	0.0317	0.091	0.0158	0.00369	-0.114	0.275	0.238	0.173	-0.0552	-0.123	-0.278	0.202	-0.0601	-0.000678	-0.197
SDCB1_HUMAN	SDCBP	0.346	0.201	0.387	-0.405	0.011	0.142	-0.529	-0.404	0.558	-0.0208	-0.0986	0.296	0.616	-0.511	0.352	0.198	-0.19	0.55	-0.21	-0.0667	-0.167	0.109	0.238	-0.458	-0.198	0.00549	-0.185	0.347	-0.512	0.0365
SDF1_HUMAN	CXCL12	0.124	-0.668	-0.197	0.181	-0.161	-0.758	0.373	0.236	0.0178	-0.163	0.494	-0.0768	-0.201	-0.0944	-0.0994	0.208	-0.557	-0.341	0.269	0.182	0.712	0.124	-0.0361	-0.331	0.491	-0.0982	-0.038	-0.199	-0.139	0.145
SE6L1_HUMAN	SEZ6L	0.0655	0.0612	-0.016	0.0947	0.0273	0.204	-0.193	0.0321	0.0706	-0.182	-0.14	-0.202	0.318	-0.123	-0.0496	0.0525	-0.0549	0.145	0.147	-0.12	-0.422	-0.0826	-0.0499	-0.0467	-0.327	0.156	0.0578	-0.000246	0.0131	0.0935
SE6L2_HUMAN	SEZ6L2	0.141	0.0587	-0.00316	0.0813	-0.158	0.157	-0.0579	-0.131	-0.00964	-0.265	0.0121	-0.068	0.1	-0.0789	-0.169	0.145	0.00838	0.0888	-0.0754	-0.122	-0.247	0.012	0.0277	0.0665	-0.0603	0.121	-0.0345	0.0328	0.0602	0.000955
SELM_HUMAN	SELENOM	-0.136	0.208	0.271	-0.119	0.0988	-0.00961	0.0961	-0.171	-0.0544	-0.29	-0.0597	-0.156	-0.22	0.0478	0.103	-0.0807	-0.0385	0.266	0.216	0.019	-0.477	0.0774	0.00922	0.0514	0.0707	-0.104	-0.142	-0.0122	0.158	0.246
SEM3A_HUMAN	SEMA3A	0.0927	0.0443	-0.165	-0.0266	0.19	-0.0626	-0.345	0.116	-0.111	0.358	-0.00603	0.275	0.0631	-0.102	0.0839	-0.0285	0.2	-0.0234	-0.287	-0.382	-0.215	-0.0896	-0.0997	0.603	-0.52	0.046	0.135	-0.193	-0.0471	-0.33
SEM3B_HUMAN	SEMA3B	-0.115	-0.0441	0.00421	-0.142	0.0485	-0.0883	0.193	-0.063	-0.0611	0.136	0.216	-0.0494	0.0623	-0.00249	0.0689	0.0583	0.126	-0.12	-0.136	-0.0477	0.149	0.189	0.112	-0.0272	-0.093	-0.00354	0.216	-0.165	0.0856	-0.128
SEM3C_HUMAN	SEMA3C	0.194	0.145	-0.0524	-0.217	0.000729	-0.132	0.221	-0.237	0.068	-0.0198	0.0583	0.159	0.19	-0.132	0.219	-0.0937	0.468	0.0737	-0.122	-0.293	0.207	-0.0822	0.0884	-0.205	-0.513	0.141	0.207	-0.011	0.11	-0.113
SEM3D_HUMAN	SEMA3D	0.0963	0.0476	0.0601	0.153	-0.105	-0.381	-0.139	-0.0691	0.101	0.0746	0.161	-0.108	0.437	-0.125	0.228	-0.0277	0.277	-0.0363	-0.182	-0.211	0.00577	0.0813	0.289	-0.0878	-0.314	0.312	0.234	-0.165	0.11	-0.0439
SEM3E_HUMAN	SEMA3E	0.242	-0.219	-0.674	0.135	0.377	-0.307	-0.222	-0.315	-0.135	-0.02	-0.0336	0.175	0.175	0.0786	0.213	-0.0412	0.593	-0.1	-0.359	-0.839	-0.371	-0.327	0.12	-0.273	-0.782	0.67	0.54	-0.0115	0.399	-0.346
SEM3F_HUMAN	SEMA3F	0.0824	0.0682	-0.0392	-0.184	0.166	0.16	0.124	-0.318	0.00845	-0.286	0.013	0.0221	0.0434	-0.141	0.174	-0.106	0.151	-0.0302	-0.132	-0.0357	0.419	-0.00481	-0.0924	-0.0932	0.0654	-0.148	-0.0889	-0.0525	-0.189	0.039
SEM3G_HUMAN	SEMA3G	-0.183	0.0294	-0.168	0.0866	0.0174	-0.177	-0.0505	0.211	0.174	0.209	-0.0309	-0.281	0.211	0.00726	0.157	-0.0559	-0.0663	-0.17	-0.0799	0.0774	-0.163	-0.0648	-0.446	-0.0958	0.0393	0.129	0.0298	0.0275	0.254	0.0696
SEM4A_HUMAN	SEMA4A	0.0329	-0.0546	0.311	0.0127	0.101	0.132	0.00687	-0.149	-0.00268	-0.384	0.0218	0.0584	0.0533	0.0148	-0.0143	-0.0504	0.403	-0.0697	-0.101	-0.21	0.0113	0.00655	-0.0186	-0.112	-0.228	0.0946	0.184	-0.0729	0.196	-0.0969
SEM4B_HUMAN	SEMA4B	0.00404	0.0156	-0.0519	0.173	-0.0754	0.0186	0.141	0.163	-0.0258	0.244	0.111	-0.0498	0.226	0.304	0.0115	-0.163	-0.00999	-0.018	0.227	-0.0626	0.127	-0.0114	0.0165	-0.067	-0.00295	0.0188	0.0212	-0.0205	0.339	-0.0407
SEM4C_HUMAN	SEMA4C	-0.0588	0.0875	0.0384	-0.0557	-0.0193	-0.0868	0.0399	-0.018	-0.152	0.237	0.127	0.0397	-0.157	0.0476	-0.0095	-0.0119	0.284	0.167	0.122	-0.148	-0.108	0.0617	-0.0151	0.0872	-0.0589	-0.0604	-0.00484	0.00327	0.12	-0.0429
SEM4D_HUMAN	SEMA4D	0.0447	0.0739	-0.187	0.371	-0.106	0.0254	-0.0453	-0.0663	-0.18	0.051	0.295	-0.208	0.147	0.228	-0.191	-0.0452	0.257	0.16	-0.0811	0.16	0.0945	-0.223	0.0155	-0.0373	-0.00198	0.12	0.173	0.00253	0.327	-0.0547
SEM6A_HUMAN	SEMA6A	0.119	0.125	-0.128	-0.093	-0.176	0.0592	0.0405	-0.179	0.00294	-0.0957	0.11	-0.0168	0.0291	-0.0101	0.165	-0.0693	0.295	0.0684	-0.101	-0.148	0.108	-0.0259	0.0921	-0.149	-0.0674	0.167	-0.0266	-0.0086	0.202	-0.0783
SEM6B_HUMAN	SEMA6B	0.00374	0.0737	0.161	-0.0887	-0.104	0.207	-0.167	-0.25	-0.0371	0.0222	0.108	-0.113	0.0182	-0.121	0.102	-0.00394	0.289	0.0128	0.0217	-0.185	-0.223	-0.156	0.0604	0.0552	0.0366	0.00574	0.109	-0.037	-0.0937	-0.0628
SEM6C_HUMAN	SEMA6C	-0.0826	0.0261	0.179	-0.00812	0.00697	0.0585	0.0372	0.159	-0.155	0.557	-0.106	0.0356	-0.358	0.0197	-0.0934	0.0731	0.271	0.287	-0.0568	-0.261	0.146	-0.29	-0.0236	0.263	0.0163	-0.053	-0.169	-0.105	0.0919	0.266
SEM6D_HUMAN	SEMA6D	0.114	0.15	0.0551	0.0306	-0.112	-0.0913	-0.02	-0.0823	0.0681	0.138	0.0477	-0.112	0.121	0.126	-0.0141	-0.0645	0.188	-0.0524	-0.0161	-0.116	0.0279	-0.0414	-0.0367	-0.0876	-0.149	0.223	0.067	0.0218	0.0895	-0.051
SEM7A_HUMAN	SEMA7A	0.00146	-0.119	-0.215	0.167	0.092	0.0397	-0.00696	-0.204	0.0826	-0.047	0.00951	-0.062	0.0737	0.12	0.234	-0.0707	0.233	-0.146	-0.0253	-0.376	-0.0925	-0.191	0.078	-0.201	-0.313	0.158	0.119	0.0336	0.192	-0.178
SEP15_HUMAN	SELENOF	-0.149	-0.162	-0.218	0.132	-0.0288	-0.688	0.0428	0.319	-0.118	0.612	0.172	-0.723	-0.22	0.333	0.053	0.214	0.00926	-0.226	0.192	0.141	-0.107	-0.415	0.262	0.219	0.445	-0.0956	-0.33	0.534	-0.0633	0.0248
SEPP1_HUMAN	SELENOP	-0.0126	0.015	0.00763	-0.116	0.237	0.0741	0.176	-0.281	0.0411	-0.553	-0.0745	0.526	-0.255	0.0469	-0.0459	-0.317	-0.0955	0.214	0.0358	0.101	0.39	0.134	0.00592	-0.617	0.234	-0.0567	-0.16	0.0474	-0.188	0.116
SERC_HUMAN	PSAT1	0.123	-0.0236	-0.136	-0.0971	0.105	-0.136	0.00805	0.0106	-0.0221	0.13	0.141	-0.0543	0.0906	-0.0981	0.0787	0.128	-0.0244	-0.257	0.198	-0.00808	0.122	0.0575	-0.0713	0.182	-0.196	0.0277	0.0703	-0.0632	-0.122	-0.0626
SEZ6_HUMAN	SEZ6	0.048	0.0472	0.152	-0.124	-0.0842	0.174	-0.0021	-0.0874	0.0211	-0.0421	0.0248	-0.0268	-0.0266	-0.0798	-0.0515	0.0663	0.0343	0.252	0.0463	-0.0592	-0.134	0.0487	-0.0355	0.187	0.0204	-0.0761	-0.0583	-0.0582	0.0313	0.0897
SFRP2_HUMAN	SFRP2	0.0664	-0.0811	0.107	-0.0157	0.0655	-0.345	0.409	-0.0614	0.0742	-0.112	0.228	-0.302	0.168	-0.174	0.236	-0.137	-0.0688	0.22	0.201	-0.22	-0.189	-0.0891	0.255	0.163	0.307	0.0365	-0.189	0.0235	-0.123	-0.0265
SFRP3_HUMAN	FRZB	0.00688	-0.203	0.475	-0.13	-0.122	-0.0768	0.0643	-0.249	0.116	-0.414	-0.00945	-0.245	-0.446	0.0571	0.0265	0.274	0.08	0.433	-0.137	0.119	0.0938	0.38	-0.128	-0.194	-0.386	-0.0212	0.114	0.0465	-0.243	0.148
SFRP4_HUMAN	SFRP4	-0.763	0.114	-0.424	-0.435	-0.141	0.115	0.669	-0.0889	0.357	-0.152	0.423	0.706	-0.5	-0.296	-0.451	-0.0776	-0.69	0.512	-0.228	0.485	0.567	0.186	-0.261	-0.132	0.312	0.0576	0.0674	0.155	-0.73	0.505
SFTPD_HUMAN	SFTPD	-0.328	0.145	-0.109	0.0124	0.00757	-0.402	0.108	0.174	0.0488	-0.0769	-0.474	0.173	0.318	-0.66	0.142	-0.0502	0.29	0.383	-0.342	-0.0225	0.0942	-0.276	0.121	0.0413	-0.53	-0.54	-0.162	0.162	-0.0155	-0.384
SG196_HUMAN	POMK	-0.0558	0.295	0.00904	0.0971	-0.391	0.062	-0.46	0.134	0.612	-0.106	-0.211	-0.0835	0.0973	-0.523	-0.145	-0.582	0.267	0.218	0.157	-0.243	-0.47	-0.195	-0.0256	-0.315	-0.859	0.391	0.0456	-0.0876	0.253	0.168
SGCE_HUMAN	SGCE	-0.00454	0.0742	0.0286	-0.015	-0.0587	-0.295	0.102	0.181	-0.187	-0.0544	-0.0841	-0.298	-0.013	0.0116	-0.076	-0.116	0.0251	0.0967	0.158	0.0784	-0.216	-0.319	-0.0298	-0.136	0.065	0.0348	-0.108	0.161	0.0592	0.00137
SH3L1_HUMAN	SH3BGRL	-0.138	0.105	-0.126	0.0859	0.0129	-0.203	-0.0229	0.245	0.0007	0.411	0.0688	-0.263	-0.017	0.3	0.141	-0.106	-0.149	-0.323	0.0981	0.247	-0.117	0.0297	0.0557	0.39	-0.272	-0.0973	0.0138	-0.103	-0.108	0.0364
SH3L3_HUMAN	SH3BGRL3	0.00875	-0.0783	-0.0343	-0.236	0.0417	0.0358	-0.166	0.155	-0.0615	0.527	-0.188	0.124	0.0433	-0.0972	0.226	0.175	-0.164	0.0225	-0.207	0.0677	0.0121	0.18	-0.0393	0.375	0.0261	-0.243	-0.139	-0.112	-0.205	0.0641
SHBG_HUMAN	SHBG	1.06	0.0972	0.0147	-0.0952	-0.266	0.291	0.633	-0.472	-0.198	1.57	0.776	-0.801	-0.248	1.15	-0.432	-0.366	1.34	-0.0225	0.109	0.00126	0.907	1.09	-0.564	-0.113	0.804	-0.2	0.446	1.1	-0.522	0.0423
SHH_HUMAN	SHH	-0.00611	0.124	0.119	0.0989	-0.121	-0.132	0.337	-0.215	-0.0396	-0.626	-0.025	-0.147	-0.791	0.252	-0.264	-0.155	0.0513	-0.296	0.308	0.423	0.497	-0.134	-0.118	0.271	0.022	-0.357	0.122	0.232	-0.0709	0.153
SHPS1_HUMAN	SIRPA	-0.0837	0.0287	0.553	-0.125	-0.103	0.266	-1.24	-0.299	-0.0581	0.0367	0.228	0.427	0.0294	0.261	-0.0893	-0.153	-0.0632	0.15	-1.11	0.322	-0.0683	-0.0935	-0.192	-0.283	-0.624	0.136	-0.109	0.45	-1.05	0.507
SHSA5_HUMAN	SHISA5	0.137	0.432	0.0299	-0.011	-0.31	0.194	-0.151	-0.0361	-0.114	-0.436	-0.176	-0.628	0.118	-0.197	0.0819	-0.0651	0.168	0.0961	-0.0493	0.189	0.103	0.229	0.14	-0.242	0.271	-0.214	-0.197	0.173	-0.228	0.169
SHSA6_HUMAN	SHISA6	-0.0425	0.0324	0.362	-0.217	-0.0828	0.183	0.0158	0.0143	-0.256	0.227	-0.0553	-0.26	0.035	-0.0529	-0.138	-0.0743	0.326	0.242	0.193	0.128	-0.291	-0.0532	0.000147	0.348	0.108	-0.0533	-0.0556	0.0148	0.0633	0.279
SHSA8_HUMAN	SHISA8	-0.0146	0.00631	0.59	-0.36	0.0697	0.452	-0.198	-0.585	0.229	-0.343	-0.298	-0.456	0.0377	-0.353	-0.0593	-0.472	0.117	0.634	0.577	0.152	-0.564	-0.3	0.391	0.52	-0.0997	-0.313	0.068	-0.00985	0.343	0.0669
SIA10_HUMAN	ST3GAL6	0.153	-0.0885	0.1	-0.156	0.0492	0.159	0.187	0.0334	-0.119	0.0298	0.04	-0.0764	-0.319	0.265	-0.391	-0.118	-0.00304	0.0263	0.0392	0.203	0.539	0.109	0.0231	-0.22	-0.0754	-0.208	0.0133	-0.107	-0.106	0.00256
SIA7A_HUMAN	ST6GALNAC1	0.0906	-0.00497	0.127	-0.0975	-0.00953	0.145	-0.206	-0.000982	-0.00782	-0.0485	0.0286	-0.177	0.0352	0.0971	0.113	-0.0423	0.259	0.144	-0.0763	0.11	-0.229	-0.073	-0.107	0.14	0.04	0.0615	-0.127	0.0276	-0.153	0.249
SIA7E_HUMAN	ST6GALNAC5	0.0982	-0.182	-0.141	-0.0355	-0.0772	0.0688	-0.484	0.0332	0.0443	0.0114	-0.00249	0.0336	0.26	-0.215	-0.0279	0.216	-0.0485	0.0824	-0.00606	-0.244	-0.327	0.0104	-0.0939	-0.2	-0.416	0.32	-0.0282	0.146	0.0121	0.191
SIA8C_HUMAN	ST8SIA3	-0.0273	-0.0838	-0.178	0.0489	0.159	0.0879	0.0197	0.134	-0.0921	0.362	-0.0953	0.0688	0.302	-0.0625	-0.108	-0.0231	0.142	-0.117	0.165	-0.0943	-0.198	-0.165	0.0674	-0.0944	-0.151	0.255	0.038	0.0565	0.169	-0.215
SIA8D_HUMAN	ST8SIA4	0.149	0.0928	0.473	-0.036	-0.0444	0.211	-0.146	-0.022	0.163	-0.255	0.205	-0.119	0.293	-0.0693	0.198	-0.0869	0.212	0.267	-0.251	-0.0409	-0.116	0.431	0.138	0.721	-0.022	-0.327	-0.0448	0.0675	-0.298	0.015
SIA8E_HUMAN	ST8SIA5	0.259	0.0187	0.245	-0.104	-0.167	0.254	-0.0333	-0.204	-0.0755	-0.253	0.0726	-0.279	-0.00464	0.14	0.0934	-0.484	0.0859	-0.12	0.243	-0.0138	-0.233	-0.278	0.0563	-0.256	0.162	0.108	-0.134	0.0624	0.0708	-0.0268
SIAE_HUMAN	SIAE	0.0345	0.0873	0.211	-0.378	-0.128	-0.15	0.0716	-0.263	-0.0189	0.215	-0.184	0.255	-0.0864	-0.319	0.132	0.0327	0.292	0.15	-0.154	-0.446	0.103	-0.0411	0.178	-0.284	-0.424	-0.0769	0.202	0.0882	0.0565	-0.17
SIAT1_HUMAN	ST6GAL1	-0.0104	-0.289	-0.116	0.0469	0.0883	-0.166	0.13	0.141	0.0145	-0.0372	-0.205	0.132	-0.204	-0.191	-0.0482	0.291	-0.097	-0.128	-0.222	0.148	0.411	0.0434	0.271	-0.0524	-0.103	0.168	-0.0161	-0.169	0.0279	-0.0519
SIAT2_HUMAN	ST6GAL2	-0.0403	-0.0247	-0.0115	-0.00027	-0.0341	0.0452	-0.00363	0.0375	-0.128	0.211	-0.0117	-0.235	0.057	-0.00844	-0.0877	0.156	0.0603	-0.0038	0.0132	0.0909	0.0222	-0.0757	0.0153	0.204	-0.117	0.134	-0.0396	-0.13	0.00537	0.0065
SIG14_HUMAN	SIGLEC14	0.0427	0.475	0.195	0.0603	-1.23	0.534	-0.439	-0.562	-0.175	-1.01	0.213	-0.0499	-1.75	0.0697	0.179	-0.126	-0.129	0.335	0.173	-0.312	0.0654	0.282	0.246	-0.667	0.452	-0.753	-0.505	0.327	0.105	-0.487
SIGL9_HUMAN	SIGLEC9	-0.109	0.859	-0.00544	-0.194	0.135	0.118	0.0626	0.0896	0.0699	0.0609	-0.404	0.0367	-0.276	0.11	0.0445	0.0689	0.453	0.0317	-0.306	0.0962	-0.124	0.247	0.117	-0.18	-0.172	-0.305	-0.269	0.398	0.34	-0.115
SIL1_HUMAN	SIL1	0.337	0.0704	0.219	-0.2	0.00846	-0.136	0.044	-0.201	0.131	-0.151	-0.0609	0.117	0.419	-0.212	0.335	0.162	0.0472	0.214	-0.0854	-0.13	-0.0531	0.29	0.0098	-0.187	0.0102	0.184	-0.0325	-0.0798	-0.35	0.312
SIRB1_HUMAN	SIRPB1	1.04	-0.233	0.287	0.437	-0.116	0.89	-0.262	0.361	-0.227	-0.0355	-0.303	0.15	0.298	-0.438	-0.0577	0.706	-0.262	0.305	0.0915	0.0857	-0.225	0.817	0.438	0.432	0.231	0.471	-0.0941	-0.206	-0.424	0.0941
SIRB2_HUMAN	SIRPB2	-0.00321	-0.276	0.461	-0.33	0.0903	0.119	-0.18	0.0128	-0.347	0.00527	-0.364	0.23	-0.446	0.0205	-0.0562	0.175	0.404	0.0576	0.00907	0.143	0.156	0.0445	-0.0077	0.0143	0.213	0.141	-0.0363	-0.0799	-0.437	-0.188
SIRPG_HUMAN	SIRPG	0.0435	-0.23	0.159	-0.255	0.0454	0.145	-0.35	-0.348	0.0949	-0.335	-0.312	-0.0593	0.127	-0.098	0.265	0.0202	0.402	-0.0889	-0.115	-0.0166	-0.477	-0.0321	0.000836	-0.0925	-0.59	0.137	-0.0632	-0.114	-0.00352	0.0843
SKP1_HUMAN	SKP1	-0.0436	0.199	-0.223	-0.026	-0.0172	-0.0191	-0.0588	0.265	0.2	0.204	0.169	-0.304	0.146	-0.0147	0.0764	0.0192	-0.113	-0.0909	0.148	0.196	-0.0754	-0.266	0.0768	0.282	-0.13	0.0643	0.269	-0.0613	-0.0289	-0.0101
SLAF5_HUMAN	CD84	0.113	0.0337	-0.081	-0.0379	0.0661	0.0699	0.00699	-0.292	0.199	0.0699	0.0276	0.108	-0.0822	0.0259	-0.0882	0.23	-0.0892	-0.0209	-0.379	-0.0741	-0.0597	0.0911	-0.0478	-0.0382	-0.146	-0.341	0.199	0.0227	-0.0901	0.169
SLIK1_HUMAN	SLITRK1	-0.11	0.0315	-0.326	0.164	-0.0024	0.312	-0.441	-0.14	0.0659	-0.6	-0.176	0.357	0.287	-0.0934	-0.257	0.0318	-0.119	0.0378	-0.0146	-0.166	-0.673	-0.0976	-0.114	-0.283	-0.666	0.38	0.026	0.0484	0.172	0.00761
SLIK2_HUMAN	SLITRK2	0.29	0.0152	0.0606	0.0833	-0.0141	-0.11	-0.129	-0.0644	-0.313	0.196	0.118	-0.147	0.299	-0.0799	0.0472	0.0287	0.137	-0.202	-0.0783	-0.23	-0.163	-0.403	-0.213	0.167	-0.389	0.199	0.0726	-0.0641	0.15	-0.168
SLIK3_HUMAN	SLITRK3	0.00531	-0.127	-0.406	0.216	0.11	-0.242	-0.0843	0.305	-0.121	0.6	0.112	0.0239	-0.0891	-0.0438	0.0871	0.295	0.369	-0.204	-0.0978	-0.371	-0.169	-0.267	0.00909	0.384	-0.325	0.304	0.211	0.0463	0.291	-0.462
SLIK4_HUMAN	SLITRK4	0.0343	-0.032	-0.58	0.614	-0.151	-0.404	-0.309	0.39	-0.213	0.272	0.216	-0.623	0.201	0.215	0.0299	-0.012	0.187	-0.239	0.392	-0.346	-0.302	-0.483	-0.202	0.00551	-0.444	0.645	0.243	0.149	0.521	-0.408
SLIK5_HUMAN	SLITRK5	-0.0297	0.0743	-0.322	0.225	-0.0694	0.0703	-0.183	0.169	-0.148	0.0518	-0.0704	-0.121	0.301	0.00211	-0.107	0.19	0.131	-0.127	0.0451	-0.0667	-0.155	-0.0743	-0.0375	-0.0887	-0.406	0.372	0.0787	0.0235	0.191	-0.049
SLIK6_HUMAN	SLITRK6	-0.257	0.321	0.101	-0.0641	0.352	-0.321	-0.0257	0.861	-0.412	1.22	0.127	0.146	-0.357	-0.0726	-0.324	0.76	0.498	0.158	0.0331	-0.0948	0.0828	0.249	-0.283	1.19	0.297	-0.268	-0.171	-0.124	0.603	0.0479
SMS_HUMAN	SST	0.0379	0.0466	-0.219	0.673	0.206	0.0851	-0.378	0.102	-0.1	-0.372	-0.245	-0.109	0.553	-0.246	-0.404	0.0235	-0.213	-0.139	0.216	0.144	0.27	-0.196	-0.22	0.0394	-0.66	0.438	-0.131	0.021	0.216	0.0417
SNED1_HUMAN	SNED1	0.0583	0.0907	0.0944	-0.0582	-0.146	0.00391	0.259	-0.0641	0.155	-0.348	0.0434	0.0136	-0.197	-0.051	0.0903	-0.142	-0.0445	0.168	-0.154	0.328	0.673	0.156	0.103	0.00592	0.154	-0.114	0.0196	-0.0642	-0.161	0.131
SNP25_HUMAN	SNAP25	0.0512	0.0297	0.103	0.0708	0.0539	0.135	0.159	-0.125	0.154	-0.227	0.172	-0.18	0.0742	-0.0529	-0.084	-0.321	0.065	-0.15	0.116	0.0735	-0.0428	0.0535	0.0414	0.138	-0.245	-0.0214	0.0448	-0.22	-0.168	-0.114
SNX12_HUMAN	SNX12	-0.0652	-0.0156	0.0727	0.178	0.282	0.188	-0.157	0.00362	0.00618	-0.013	-0.136	0.258	-0.0725	-0.134	0.0761	-0.14	-0.2	-0.00716	-0.185	0.258	0.441	-0.141	-0.201	0.321	-0.0613	-0.245	-0.415	-0.0705	-0.0819	0.139
SNX3_HUMAN	SNX3	-0.0748	-0.0802	0.114	0.184	0.0679	-0.0415	0.0364	0.258	-0.00302	0.267	0.126	0.218	0.0355	0.149	-0.23	-0.0214	-0.025	0.0122	-0.0609	-0.0809	-0.0554	-0.126	0.186	0.264	0.00473	0.157	-0.105	-0.125	0.21	0.0133
SODC_HUMAN	SOD1	0.0324	0.028	0.316	-0.229	0.181	0.263	-0.0589	-0.368	0.176	-0.456	-0.386	0.27	0.123	-0.00367	-0.164	-0.223	0.132	-0.0364	-0.0879	0.278	-0.6	0.197	-0.106	-0.356	-0.136	0.229	0.0259	-0.0455	-0.0322	0.312
SODE_HUMAN	SOD3	0.0365	0.533	0.501	-0.551	-0.0487	0.175	0.0255	-0.42	0.225	-0.011	-0.0834	0.215	-0.229	-0.0133	0.535	-0.202	0.273	0.366	-0.601	-0.167	0.127	0.579	-0.0414	-0.303	-0.125	-0.0581	-0.0788	0.274	-0.544	0.121
SODM_HUMAN	SOD2	-0.226	-0.0317	-0.381	0.357	-0.168	-0.369	0.147	0.391	-0.265	0.117	0.226	-0.438	0.327	-0.11	-0.168	-0.0824	0.0731	0.0287	0.224	0.0454	0.47	-0.312	-0.277	0.106	-0.000215	0.202	-0.0874	-0.0137	0.141	-0.243
SORC1_HUMAN	SORCS1	0.201	0.163	-0.302	0.132	-0.158	0.121	0.000171	-0.0446	0.117	-0.155	-0.0407	-0.00713	0.236	0.0432	-0.0246	-0.0365	0.206	0.133	-0.0735	-0.347	-0.103	-0.136	-0.0452	-0.162	-0.42	0.4	0.27	-0.104	0.239	-0.115
SORC2_HUMAN	SORCS2	0.167	0.233	-0.0436	-0.173	0.0393	0.296	-0.096	-0.281	0.325	-0.618	-0.47	0.263	0.217	-0.552	0.07	-0.0462	0.0167	0.0754	-0.2	0.0586	-0.55	0.0806	0.0376	-0.227	-0.433	0.034	0.0771	-0.0991	-0.192	0.383
SORC3_HUMAN	SORCS3	0.0511	-0.0286	-0.322	0.254	-0.0755	-0.0492	-0.139	0.0131	0.0408	0.126	0.021	-0.166	0.247	0.187	-0.0488	-0.0188	-0.0562	0.0639	0.22	-0.185	-0.275	-0.153	0.0367	-0.0283	-0.366	0.391	0.329	-0.036	0.257	-0.0637
SORL_HUMAN	SORL1	-0.11	-0.0868	-0.275	0.205	-0.112	-0.255	0.0303	0.0819	-0.013	0.227	0.101	-0.264	-0.0764	0.249	0.0488	0.0908	-0.0477	0.00897	0.049	-0.373	0.15	0.0127	0.0756	-0.098	0.0584	-0.123	0.276	-0.105	0.227	-0.337
SORT_HUMAN	SORT1	0.14	0.0305	-0.145	0.0177	-0.0291	-0.221	0.0407	-0.0629	-0.000988	0.00605	0.0567	-0.134	-0.116	0.0232	0.0445	0.1	0.166	-0.0385	-0.0884	-0.26	0.0155	-0.0555	0.0228	0.0582	-0.315	0.0281	-0.00433	-0.0535	0.123	-0.246
SPB6_HUMAN	SERPINB6	-0.184	0.153	-0.0825	-0.0767	-0.132	0.0303	0.105	0.0127	-0.079	0.051	0.00574	-0.276	-0.0955	0.258	0.175	-0.00489	-0.0655	-0.317	0.044	0.0239	0.199	0.0279	0.114	0.0348	-0.0896	-0.208	-0.0797	0.00718	0.0308	-0.0661
SPB9_HUMAN	SERPINB9	-0.101	-0.303	-0.44	-0.169	-0.0255	-0.0982	0.202	0.233	0.00667	0.211	0.12	0.138	-0.15	0.124	0.0122	-0.0251	0.0683	-0.193	0.0571	-0.268	0.125	-0.0373	-0.0197	0.206	0.182	-0.0126	-0.249	0.163	-0.292	-0.0622
SPESP_HUMAN	SPESP1	0.0131	-0.447	-0.119	0.0851	-0.258	-0.159	0.491	0.414	-0.0189	-0.199	-0.0719	0.224	-0.348	0.443	-0.172	0.303	-0.252	-0.326	0.288	-0.117	0.165	0.00791	0.417	0.0161	0.464	0.226	0.191	-0.149	0.323	-0.34
SPIT1_HUMAN	SPINT1	-0.197	0.118	0.104	-0.172	-0.152	0.191	0.112	0.0259	-0.217	-0.0151	0.178	-0.193	-0.395	0.0112	0.111	-0.161	0.0234	-0.108	0.294	-0.0483	-0.125	-0.308	-0.0141	0.0381	0.0574	-0.318	-0.0647	0.111	0.302	0.0966
SPIT2_HUMAN	SPINT2	0.168	0.264	0.234	-0.0513	0.271	0.383	0.225	0.126	0.323	-0.51	-0.0481	-0.312	0.306	-0.179	-0.128	-0.0625	-0.00749	0.365	0.206	0.241	-0.0455	-0.0055	-0.168	-0.195	-0.316	0.323	0.11	-0.14	-0.215	0.141
SPON1_HUMAN	SPON1	0.00219	0.0542	0.00846	0.00747	0.00638	-0.226	-0.0645	-0.0444	-0.151	0.102	0.0067	-0.121	0.106	0.0293	-0.0349	0.0892	-0.022	-0.0623	0.00435	-0.06	-0.0981	-0.0722	-0.0384	-0.226	0.0389	-0.0109	0.0167	0.000491	0.0257	0.0527
SPON2_HUMAN	SPON2	-0.128	0.147	-0.192	-0.00464	-0.246	-0.417	0.195	0.0623	-0.181	0.158	0.000854	-0.207	-0.0831	0.155	-0.0478	-0.18	-0.0119	0.315	-0.252	0.261	0.184	0.0173	0.211	-0.352	0.117	-0.177	-0.275	0.198	0.308	0.101
SPP24_HUMAN	SPP2	0.162	-0.241	0.603	-0.322	0.0939	0.101	-0.164	0.0117	0.314	0.273	-0.0635	-0.0401	-0.143	0.144	0.0361	0.16	0.211	0.271	-0.517	-0.00104	0.463	0.281	-0.0572	0.165	0.457	-0.256	-0.00853	-0.066	-0.205	-0.682
SPRC_HUMAN	SPARC	0.0806	0.131	0.783	-0.485	0.0501	0.186	-0.189	-0.389	-0.000158	0.0789	-0.362	0.335	0.183	-0.394	0.257	0.00267	-0.0136	0.46	-0.0444	-0.42	-0.227	0.485	-0.102	-0.0678	-0.039	-0.295	-0.119	-0.0079	-0.477	0.265
SPRL1_HUMAN	SPARCL1	0.0857	0.0322	0.175	0.0215	-0.0224	0.00931	-0.143	-0.143	-0.000152	-0.291	-0.246	0.182	0.105	-0.145	0.0282	-0.0297	0.129	0.0121	-0.0478	0.0269	-0.254	-0.0501	0.149	0.05	-0.232	0.125	-0.077	-0.0953	-0.0296	0.0115
SPRN_HUMAN	SPRN	-0.00339	0.141	0.323	-0.117	-0.117	0.429	-0.128	-0.196	0.249	-0.429	-0.0935	0.206	0.0195	-0.366	-0.109	0.152	0.0717	0.327	0.0139	-0.266	-0.419	0.386	0.0435	0.244	-0.281	-0.056	0.14	-0.104	-0.228	0.228
SPTA1_HUMAN	SPTA1	-0.224	-0.369	-0.0103	0.0973	0.802	0.034	-0.192	0.9	-0.247	2.47	0.289	0.453	-0.571	-0.412	0.064	1.92	0.53	-0.457	-0.227	0.0957	0.276	-0.0118	-0.00252	2.13	0.069	-0.491	0.175	-0.514	-0.346	0.106
SPTB1_HUMAN	SPTB	0.485	-0.122	0.559	0.577	1.37	0.341	0.408	1.18	0.387	3.03	0.0649	1.55	-0.0211	-0.18	-0.124	2.79	-0.0498	0.304	-0.455	-0.225	0.227	0.128	-0.405	3.18	0.0504	-0.393	0.646	-0.313	-0.172	-0.155
SQSTM_HUMAN	SQSTM1	-0.157	-0.153	-0.332	0.152	-0.172	-0.157	0.00733	0.153	-0.0914	-0.349	-0.112	-0.266	-0.208	0.148	-0.0687	0.0706	-0.0281	-0.11	0.159	0.345	-0.215	-0.294	0.0723	0.0228	0.178	0.0258	0.0448	0.059	0.177	0.0448
SRCRL_HUMAN	SSC5D	-0.0107	0.287	0.00638	-0.231	-0.33	-0.0174	0.268	-0.0607	0.167	-0.258	-0.162	-0.326	0.0216	0.0636	-0.222	-0.0288	0.0698	0.176	0.15	0.266	0.0401	0.351	0.029	-0.0993	0.135	-0.198	0.174	-0.144	-0.0786	0.0698
SRGN_HUMAN	SRGN	0.29	0.226	-0.0115	-0.309	0.301	0.00737	0.0164	-0.31	-0.188	0.129	-0.0105	0.69	-0.23	-0.319	0.137	0.0337	-0.00968	0.447	-0.262	-0.186	0.0946	0.438	0.392	-0.286	0.115	-0.159	0.12	-0.235	-0.115	-0.113
SRPX_HUMAN	SRPX	0.469	0.669	-0.0981	-0.382	-0.0433	0.109	-0.0123	-0.276	-0.0981	-0.0211	0.0753	0.849	0.134	-0.0742	-0.0255	0.139	-0.176	0.198	0.188	-0.191	0.323	0.542	-0.0399	0.641	-0.21	-0.0185	-0.0901	0.312	-0.185	-0.167
STC1_HUMAN	STC1	0.294	-0.0684	0.0145	-0.165	-0.044	-0.0534	0.132	-0.128	0.176	-0.319	0.0372	-0.222	-0.0384	0.0977	0.0997	-0.269	-0.19	-0.181	0.147	-0.0187	0.0574	0.0107	-0.0757	-0.317	0.208	-0.0115	0.00539	0.171	0.12	0.117
STC2_HUMAN	STC2	0.16	0.154	0.109	-0.0486	-0.272	-0.13	0.0263	-0.251	-0.0186	-0.551	0.0336	-0.257	-0.141	-0.0213	-0.141	-0.203	0.124	0.0112	0.227	0.218	-0.37	0.00446	0.0421	-0.344	0.0797	-0.113	-0.243	0.301	0.0936	0.107
STIP1_HUMAN	STIP1	0.0681	-0.165	0.144	0.407	0.661	0.0945	-0.148	1.19	-0.285	2.23	0.156	0.184	-0.433	0.715	0.217	1.34	-0.37	0.152	-0.143	-0.0886	0.27	-0.0287	-0.116	1.9	0.36	-0.0957	0.202	-0.0419	0.133	-0.136
STMN1_HUMAN	STMN1	0.0699	0.126	-0.276	0.1	0.00609	0.0551	-0.131	0.111	0.0728	-0.0598	-0.167	-0.249	0.225	0.107	-0.0536	0.0166	-0.277	-0.0284	0.00452	0.169	-0.199	-0.17	-0.0915	0.116	-0.258	0.17	-0.0906	-0.0243	0.096	0.0221
STMN2_HUMAN	STMN2	0.515	-0.0964	-0.0498	0.2	0.241	-0.121	0.136	-0.0399	0.259	0.129	-0.137	-0.199	0.553	0.0905	-0.261	-0.26	-0.111	0.0252	0.37	0.00996	-0.174	-0.344	-0.0311	0.0515	-0.18	0.202	-0.112	0.0236	0.261	-0.104
STMN3_HUMAN	STMN3	0.0609	0.0978	-0.192	0.426	-0.135	-0.0314	-0.118	0.0634	-0.00931	-0.0826	0.023	-0.385	0.294	0.136	-0.0911	-0.0691	-0.176	-0.098	0.358	0.183	-0.145	-0.176	0.103	-0.0707	-0.228	0.332	0.0453	0.066	0.274	0.0817
STX12_HUMAN	STX12	-0.00492	0.054	0.0555	0.226	-0.0961	-0.143	-0.0145	0.226	0.123	-0.00305	0.0527	-0.187	0.138	0.124	-0.0833	-0.0976	-0.0834	-0.0355	0.359	-0.0269	-0.255	-0.0586	-0.0699	-0.0175	-0.156	0.135	-0.0534	0.121	-0.00387	0.218
STX1A_HUMAN	STX1A	-0.176	0.00441	0.0524	0.0189	-0.105	0.407	0.325	-0.44	0.0225	0.286	-0.188	0.407	-0.00641	-0.0475	-0.743	-0.0346	-0.118	0.112	0.0319	-0.0346	0.0339	0.0854	-0.0464	0.0318	0.341	-0.339	0.357	-0.193	-0.0113	-0.117
STX1B_HUMAN	STX1B	0.0725	0.23	-0.046	0.0165	0.06	0.132	0.0361	-0.207	-0.19	-0.449	0.0318	-0.386	0.107	0.227	-0.11	-0.25	0.0884	0.0655	0.192	-0.0456	-0.203	-0.149	-0.083	0.686	-0.169	-0.149	0.0175	-0.13	0.027	-0.192
STX7_HUMAN	STX7	-0.189	0.103	-0.233	0.316	0.0376	-0.0208	-0.123	0.155	-0.0998	-0.0752	-0.0212	-0.521	0.198	0.12	0.0802	-0.281	0.0705	-0.117	0.279	0.0654	-0.27	-0.337	-0.1	-0.272	-0.207	0.375	0.00734	0.123	0.318	0.0966
SULF2_HUMAN	SULF2	0.0352	0.162	0.0282	-0.108	-0.116	0.0833	0.0574	-0.11	-0.0752	-0.423	-0.121	-0.207	0.12	-0.00147	-0.265	-0.137	-0.243	-0.0916	0.00691	0.0694	0.29	0.0147	0.0815	-0.108	-0.0649	-0.00536	-0.0894	0.029	-0.0168	0.119
SUMF1_HUMAN	SUMF1	-0.218	-0.015	0.0741	-0.16	0.0413	0.137	0.376	-0.201	0.255	-0.552	0.122	0.135	0.153	-0.25	0.134	-0.0742	0.0255	-0.41	0.108	-0.0178	-0.00116	-0.149	0.0498	-0.105	-0.144	-0.23	0.0835	-0.111	-0.0243	0.328
SUMF2_HUMAN	SUMF2	-0.119	-0.233	0.143	0.144	0.0742	-0.0882	-0.0698	-0.0955	-0.0808	-0.0597	0.176	-0.281	0.242	-0.0107	-0.083	0.00669	-0.0646	-0.0202	0.0934	-0.0831	-0.0413	-0.033	0.155	0.0377	0.00244	0.0565	-0.105	-0.106	0.238	0.0941
SUMO2_HUMAN	SUMO2	-0.189	0.0332	-0.851	0.141	-0.0925	-0.016	-0.281	0.63	-0.473	0.762	0.178	0.278	-0.225	0.0401	-0.126	0.451	-0.593	-0.478	-0.0164	0.174	-0.15	0.0258	-0.195	0.667	-0.229	0.0319	0.000241	0.0885	0.163	-0.603
SUSD5_HUMAN	SUSD5	-0.0267	0.426	-0.121	0.0953	-0.0266	0.106	-0.0475	-0.0052	0.196	-0.324	0.0173	-0.395	0.379	0.036	-0.159	-0.131	-0.129	-0.128	0.186	0.241	-0.216	-0.542	0.188	-0.0519	-0.147	0.225	0.145	-0.0149	0.027	0.0192
SV2A_HUMAN	SV2A	0.101	0.0134	0.0231	-0.148	-0.16	-0.0703	-0.312	0.196	-0.1	0.567	-0.164	0.0389	0.323	-0.275	-0.0853	0.297	-0.00911	-0.0173	0.21	-0.127	-0.425	-0.0523	-0.155	0.318	-0.273	0.213	0.0685	-0.00196	-0.0621	0.0692
SVIP_HUMAN	SVIP	0.016	0.174	0.0939	0.1	-0.125	0.12	-0.0522	0.0449	0.144	-0.347	-0.22	0.0337	0.0875	-0.146	0.107	-0.152	-0.0601	0.128	-0.0154	-0.00679	-0.436	-0.0252	-0.0649	-0.0401	-0.333	0.0309	0.0916	0.0523	0.0602	0.0939
SYAC_HUMAN	AARS	0.0792	0.0288	-0.0468	-0.00766	-0.0646	0.0619	-0.197	0.121	0.0565	0.233	0.263	-0.178	0.247	0.182	-0.0926	0.106	0.217	0.161	0.388	0.106	-0.0806	-0.0143	-0.0933	0.446	-0.0997	-0.0526	0.208	0.0573	-0.183	-0.0159
SYN1_HUMAN	SYN1	0.181	0.0832	-0.051	0.0186	-0.0276	0.426	-0.21	-0.173	0.0805	-0.602	-0.249	0.0525	0.412	-0.455	-0.242	0.0838	-0.15	0.177	0.0159	0.124	-0.373	0.0607	-0.2	-0.235	-0.598	0.341	0.112	-0.162	-0.0958	0.0727
SYT11_HUMAN	SYT11	0.131	0.153	0.128	-0.265	-0.0334	0.309	-0.0827	-0.0168	-0.0168	0.142	0.0497	0.234	0.269	-0.285	0.0306	-0.0743	-0.0271	0.0843	-0.155	-0.011	0.0934	-0.141	-0.277	-0.00386	0.227	-0.12	0.0306	-0.0226	-0.0844	0.0314
SYT4_HUMAN	SYT4	0.0946	-0.691	0.203	-0.27	0.112	-0.0195	-0.459	-0.146	-0.178	0.269	0.0773	0.658	-0.165	-0.143	-0.126	0.0194	0.347	-0.445	0.135	-0.159	0.192	0.256	-0.00905	0.315	0.338	-0.317	-0.028	-0.215	-0.213	-0.0687
SYT7_HUMAN	SYT7	-0.825	0.336	0.348	-0.229	0.273	0.0772	0.262	-0.08	-0.172	0.345	-0.129	-0.453	0.0531	-0.113	-0.0222	0.0647	0.513	0.418	0.00328	-0.318	0.483	0.242	0.0602	0.516	0.0905	-0.147	-0.0247	-0.403	-0.198	-0.0681
SYUA_HUMAN	SNCA	-0.0598	-0.228	-0.064	0.304	0.462	-0.249	-0.213	0.63	-0.121	1.57	-0.0593	0.405	0.321	-0.0267	-0.301	0.508	-0.593	0.11	0.293	0.223	0.187	-0.429	-0.276	1.17	-0.175	0.21	0.187	-0.221	0.242	-0.0359
SYUB_HUMAN	SNCB	0.0469	0.0848	0.074	0.0893	0.364	-0.172	-0.229	0.17	0.109	-0.364	-0.0944	-0.323	-0.0132	0.0445	0.0969	-0.0733	-0.427	-0.068	0.161	0.288	0.487	-0.0573	0.116	-0.0551	0.204	-0.0223	-0.118	-0.0423	-0.326	0.0365
SYUG_HUMAN	SNCG	0.132	0.2	-0.297	0.244	0.0978	-0.055	-0.139	0.269	0.164	-0.0404	-0.126	-0.253	0.016	0.0331	-0.121	0.476	-0.25	-0.268	0.136	-0.0167	0.0199	-0.268	-0.0816	0.304	-0.297	0.266	0.155	0.0749	0.258	-0.0784
SYWC_HUMAN	WARS	-0.231	-0.212	-0.107	0.136	0.25	0.0205	0.369	0.397	-0.0706	0.497	-0.105	0.293	-0.204	0.145	0.269	0.291	-0.222	-0.189	-0.252	0.0793	0.357	-0.0457	0.157	0.724	0.198	-0.317	-0.0773	-0.0555	0.0375	-0.0641
T132A_HUMAN	TMEM132A	-0.14	0.0312	-0.171	0.135	-0.0719	0.126	-0.261	-0.0912	-0.159	0.0971	0.087	0.00026	0.249	-0.209	-0.182	0.134	-0.0757	0.0418	0.0595	0.0496	-0.286	-0.119	0.0448	0.118	-0.166	0.0503	0.0116	-0.0612	0.0952	-0.0264
T132B_HUMAN	TMEM132B	0.0185	-0.0789	-0.323	0.209	0.21	0.175	-0.351	0.409	-0.139	0.829	-0.0366	0.263	0.601	-0.236	-0.101	0.456	-0.00372	0.0938	-0.0216	-0.426	-0.485	-0.00747	0.0537	0.04	-0.532	0.427	0.236	-0.0213	0.305	-3.75e-06
T132C_HUMAN	TMEM132C	-0.00661	0.157	-0.0695	0.223	-0.0871	0.00134	0.0526	-0.0969	0.0743	-0.159	0.174	-0.0143	0.0212	0.248	0.0208	0.0188	0.147	-0.118	0.121	-0.0736	-0.106	-0.197	-0.143	-0.149	-0.0218	0.0376	0.0251	0.0253	0.116	0.0639
T132D_HUMAN	TMEM132D	0.0654	0.0876	-0.398	0.301	0.0185	0.217	-0.251	-0.00876	0.0521	-0.26	0.081	-0.143	0.376	-0.0217	-0.245	0.283	-0.158	-0.152	0.0724	-0.0576	-0.367	0.00877	-0.0538	-0.175	-0.344	0.429	0.0534	0.0485	0.225	-0.0264
T132E_HUMAN	TMEM132E	-0.111	0.0851	-0.0549	0.0373	-0.272	0.027	-0.066	0.141	-0.118	0.0112	-0.017	-0.218	0.0888	0.126	0.0761	-0.247	-0.0117	0.103	0.114	0.199	-0.191	-0.0964	-0.175	0.0854	0.0839	-0.0389	0.0182	-0.0552	-0.0225	0.204
T178A_HUMAN	TMEM178A	-0.293	-0.0358	0.051	-0.0363	-0.351	0.21	0.00611	0.128	0.0277	0.194	-0.000542	-0.125	-0.155	-0.376	-0.072	-0.0803	0.144	0.342	0.0392	0.277	-0.284	-0.2	0.0139	0.196	0.25	-0.0852	-0.0325	-0.0442	0.0863	0.147
TAGL_HUMAN	TAGLN	-0.498	-0.0508	-0.418	0.375	0.477	-0.299	0.165	0.568	0.108	-0.0988	-0.158	-0.246	0.044	0.584	0.224	-0.0331	-0.171	-0.429	0.0633	0.675	0.862	-0.0837	0.144	0.604	-0.0882	-0.247	0.271	-0.163	0.107	-0.135
TAGL2_HUMAN	TAGLN2	-0.000864	-0.0373	-0.255	-0.013	0.251	-0.226	-0.0678	0.328	-0.141	0.874	-0.445	0.361	-0.0857	0.308	0.04	0.218	-0.282	0.13	-0.305	0.187	0.053	-0.227	-0.0252	0.779	0.18	-0.278	0.0381	0.0162	-0.213	0.00761
TAGL3_HUMAN	TAGLN3	0.132	0.0645	-0.311	-0.00174	-0.244	0.186	-0.309	-0.305	0.127	-0.633	-0.182	-0.0296	0.2	-0.365	-0.272	-0.165	-0.0278	0.247	-0.0148	0.212	-0.193	-0.0559	-0.0348	-0.41	-0.386	0.114	0.0531	0.0202	0.143	0.0582
TALDO_HUMAN	TALDO1	-0.0702	0.0474	0.0713	-0.261	0.0221	0.121	-0.235	0.0323	0.116	0.33	-0.15	0.0985	0.0725	-0.341	0.0532	0.16	-0.032	0.206	-0.232	-0.0189	-0.382	0.112	-0.16	0.282	-0.148	-0.171	-0.0394	-0.0452	-0.251	-0.0535
TARSH_HUMAN	ABI3BP	0.0441	0.00923	0.106	0.0765	-0.238	-0.0138	0.142	-0.0599	0.111	-0.43	-0.105	-0.0559	-0.22	0.35	-0.107	0.237	-0.0974	-0.0313	0.0687	0.207	0.303	0.303	0.0274	-0.247	0.289	-0.0646	-0.00231	-0.152	0.0326	0.139
TBA1A_HUMAN	TUBA1A	-0.0264	-0.147	-0.172	0.261	0.278	-0.00689	-0.077	0.75	0.0958	1.15	-0.214	0.429	-0.242	0.928	0.834	0.183	-0.236	-0.0532	-0.0475	-0.22	0.497	-0.0996	-0.124	1.08	0.475	-0.142	0.272	0.0102	0.00721	-0.209
TBB5_HUMAN	TUBB	-0.000506	-0.194	0.0369	-0.0436	0.11	0.118	-0.188	0.545	-0.112	0.999	-0.137	0.0114	-0.29	0.858	0.45	-0.0352	-0.218	-0.247	-0.128	-0.342	0.772	0.0996	0.2	0.839	0.536	-0.238	0.000561	0.00979	-0.35	-0.148
TBCA_HUMAN	TBCA	0.0346	0.0861	0.0959	-0.000963	0.0248	0.142	-0.174	0.257	-0.054	0.652	-0.346	-0.123	0.00618	-0.0856	0.143	0.193	-0.0995	0.22	0.134	0.317	-0.181	-0.0209	-0.15	0.514	-0.0698	-0.0589	-0.0798	0.00535	0.00788	-0.0345
TBCB_HUMAN	TBCB	-0.168	-0.0288	0.0422	0.00381	0.181	-0.116	-0.216	0.154	-0.0996	0.0501	0.0325	-0.255	0.14	0.119	0.0354	-0.163	-0.103	-0.128	0.135	0.0277	-0.0361	-0.0986	-0.0864	-0.098	0.0922	-0.0473	0.0101	0.0477	0.154	-0.0107
TCO2_HUMAN	TCN2	-0.286	-0.23	-0.342	0.198	0.467	-0.225	0.434	0.191	-0.171	-0.175	0.727	-0.0484	-0.0215	-0.307	-0.118	-0.0853	-0.00681	0.0361	-0.104	0.602	0.504	0.15	0.38	-0.0326	0.53	-0.0543	0.146	-0.191	-0.312	-0.365
TCTP_HUMAN	TPT1	0.115	0.0466	0.182	-0.102	0.0778	0.0955	-0.0825	0.263	-0.00694	0.349	-0.0945	0.0904	0.00754	0.182	0.228	-0.000775	-0.198	0.0844	0.0161	-0.0663	0.224	-0.0225	-0.101	0.197	-0.0207	-0.139	-0.0157	0.0564	0.00264	-0.08
TECT3_HUMAN	TCTN3	-0.126	-0.00565	0.00811	0.0695	-0.00976	-0.0631	-0.00884	-0.0384	-0.0285	0.483	0.0886	-0.229	-0.297	0.0831	-0.0429	0.0371	-0.102	0.111	0.156	-0.144	0.0746	-0.087	-0.00134	-0.0104	-0.0353	0.271	0.112	-0.0866	0.17	0.166
TEFF2_HUMAN	TMEFF2	0.167	-0.137	-0.64	0.0494	0.0769	-0.184	0.261	0.181	-0.105	0.191	0.243	-0.298	-0.169	0.41	-0.178	0.449	-0.0207	0.0636	0.0339	0.493	-0.121	-0.1	-0.00163	-0.0884	-0.173	0.422	0.00479	-0.0701	0.395	0.0567
TEN1_HUMAN	TENM1	0.0188	-0.0124	0.0466	0.0396	-0.0542	0.226	-0.107	-0.0129	-0.0937	0.0881	0.0338	-0.188	-0.0615	-0.0853	0.012	-0.0353	0.134	0.136	0.2	-0.0517	-0.0605	-0.124	-0.13	0.148	0.0759	0.0624	-0.0249	-0.0996	0.0877	-0.109
TEN2_HUMAN	TENM2	0.0969	0.0752	-0.141	0.00708	0.049	0.109	-0.0252	-0.107	-0.0328	-0.166	0.00962	0.0734	0.136	-0.0524	0.0302	0.0647	0.0851	-0.136	-0.0106	-0.273	-0.153	0.0447	-0.0659	-0.0794	-0.331	0.195	0.0123	0.00281	0.0555	-0.122
TENA_HUMAN	TNC	0.011	0.122	0.166	-0.138	-0.0479	0.165	-0.129	-0.0103	-0.000506	-0.268	0.0463	-0.0873	0.241	0.2	-0.26	0.072	0.0151	0.136	-0.132	-0.28	0.284	0.0119	0.118	-0.103	0.279	-0.204	-0.182	-0.00469	-0.152	0.0426
TENR_HUMAN	TNR	0.0598	0.111	0.167	-0.013	-0.12	0.169	-0.0331	-0.0223	-0.0423	0.214	-0.0908	-0.0558	0.0811	0.2	0.0196	-0.0391	0.0269	-0.0372	0.258	-0.113	0.103	-0.0838	0.221	0.0657	0.244	-0.127	-0.02	-0.0498	0.00711	-0.0714
TENX_HUMAN	TNXB	0.0638	-0.236	-0.0183	-0.0985	-0.249	0.0659	0.0114	0.0152	-0.0907	0.077	-0.0247	0.0327	0.163	-0.221	-0.0947	0.0336	-0.28	-0.176	0.0348	0.1	0.343	0.0433	0.166	-0.269	0.0319	-0.0296	-0.158	-0.0441	-0.0312	0.0249
TERA_HUMAN	VCP	0.00446	-0.184	0.102	0.171	0.511	0.078	-0.147	1.02	-0.161	2.16	-0.179	0.892	-0.545	0.577	0.599	1.39	-0.464	-0.295	-0.498	-0.414	-0.179	-0.168	-0.105	2.16	0.0977	-0.236	0.0631	0.109	0.0944	-0.213
TETN_HUMAN	CLEC3B	0.0139	0.0442	0.14	-0.195	-0.0834	-0.0621	0.0932	-0.144	0.162	-0.49	-0.19	-0.251	-0.074	-0.084	0.074	-0.114	-0.188	0.248	0.0253	0.299	0.107	0.0975	0.0566	-0.365	0.061	0.148	-0.146	0.12	-0.264	0.172
TF_HUMAN	F3	0.273	0.0596	-0.105	-0.0523	-0.0258	0.0327	0.0458	0.315	0.00245	-0.206	-0.209	0.0767	0.0142	0.204	0.182	0.194	0.315	0.1	-0.29	-0.302	0.00691	0.0468	-0.031	0.294	0.0201	-0.177	-0.108	-0.0108	0.000216	0.0191
TFPI1_HUMAN	TFPI	-0.103	-0.0686	0.25	-0.124	0.0303	-0.431	0.131	0.155	0.0416	0.0538	-0.00212	-0.176	-0.291	-0.089	0.0167	0.0132	-0.2	0.209	-0.00657	0.257	0.423	0.274	-0.0148	-0.0464	0.13	-0.126	-0.225	0.0992	-0.0698	0.189
TFR1_HUMAN	TFRC	-0.128	-0.0894	-0.279	-0.222	0.145	-0.207	0.256	-0.197	0.41	-0.243	-0.392	-0.112	0.231	0.288	-0.207	0.339	0.214	0.0353	0.0617	-0.321	0.29	-0.111	0.0872	0.573	-0.0183	0.0926	-0.0991	0.0631	-0.106	-0.294
TGBR3_HUMAN	TGFBR3	-0.109	0.00335	-0.00892	0.0996	-0.0678	-0.298	0.173	0.0707	-0.00263	-0.108	-0.0477	-0.197	-0.11	0.167	0.0247	0.0982	0.0971	-0.00211	0.0359	-0.0245	0.158	-0.0468	0.0271	-0.132	0.0455	0.0926	-0.0476	0.0794	-0.0198	-0.07
TGFB2_HUMAN	TGFB2	-0.134	-0.0256	0.541	-0.515	0.0869	-0.0627	0.157	-0.479	0.0567	-0.0959	-0.279	0.676	0.15	-0.456	0.129	0.171	-0.0587	0.138	-0.204	-0.119	0.0465	0.537	0.0595	-0.495	-0.342	-0.181	0.00328	0.148	-0.122	0.0995
TGON2_HUMAN	TGOLN2	-0.0689	-0.0448	-0.394	0.55	0.0857	-0.0689	0.0982	0.201	-0.0247	-0.0213	0.0828	-0.287	0.377	0.442	0.161	-0.126	-0.112	-0.149	0.22	0.537	-0.111	-0.22	0.182	-0.256	-0.299	0.583	0.128	-0.0514	0.347	0.281
THBG_HUMAN	SERPINA7	0.0337	-0.537	-0.0464	-0.313	0.35	0.335	0.465	-0.321	0.0302	0.463	0.253	0.441	-0.683	0.0436	-0.343	-0.0681	0.5	-0.514	-0.00485	0.239	0.728	0.445	0.341	0.137	0.529	-0.577	-0.35	-0.0615	-0.441	-0.07
THIC_HUMAN	ACAT2	0.0391	-0.827	0.213	0.157	0.449	-0.112	-0.221	0.785	-0.191	1.5	0.00836	0.372	-0.0741	0.0803	0.387	1.05	-0.552	-0.353	-0.234	0.0913	0.324	0.0548	-0.781	1.87	-0.00247	-1.03	0.0482	-0.0365	-0.421	-0.28
THIO_HUMAN	TXN	-0.312	-0.0992	-0.414	0.309	-0.221	-0.295	-0.298	0.407	-0.267	0.709	0.0142	-0.34	0.186	0.269	-0.287	-0.0129	-0.186	-0.0779	0.302	0.284	-0.259	-0.337	-0.135	0.193	-0.21	0.246	0.0725	0.171	0.501	0.129
THRB_HUMAN	F2	0.0369	-0.293	0.294	-0.291	0.396	0.337	0.337	-0.476	0.225	-0.611	0.552	0.594	-0.664	-0.0399	-0.327	-0.253	-0.00339	-0.345	0.0686	0.0954	0.574	0.269	0.263	-0.0628	0.701	-0.581	0.197	-0.162	-0.538	-0.126
THTM_HUMAN	MPST	-0.00427	0.0441	-0.0909	0.124	0.35	0.161	-0.178	0.706	-0.0634	1.37	-0.19	0.433	-0.254	-0.311	-0.0717	0.994	-0.25	-0.126	0.162	0.153	-0.00166	0.0716	-0.0677	1.51	0.132	-0.112	0.252	-0.243	-0.145	-0.00369
THY1_HUMAN	THY1	-0.0069	0.143	-0.12	-0.0694	0.0791	0.36	-0.113	-0.375	0.267	-0.425	-0.467	-0.0115	0.426	0.0646	0.159	0.0116	0.114	0.0241	-0.0833	-0.21	0.0024	0.0549	-0.267	-0.343	-0.657	0.358	-0.116	-0.0567	-0.00859	0.0847
TICN1_HUMAN	SPOCK1	0.0461	0.268	0.431	-0.142	-0.0173	0.302	-0.0989	-0.249	0.0765	-0.251	-0.12	-0.0391	0.202	-0.428	0.251	-0.113	0.274	0.33	0.138	-0.0797	-0.491	0.192	0.0658	-0.0504	-0.202	-0.0504	-0.0241	0.193	0.0779	0.0457
TICN2_HUMAN	SPOCK2	-0.105	0.0204	0.294	-0.0498	-0.0544	0.237	-0.248	-0.108	-0.27	0.297	-0.038	-0.313	0.16	-0.0561	-0.0348	-0.0429	-0.122	0.362	0.321	0.0489	0.0476	-0.342	0.0764	-0.103	0.254	-0.102	-0.12	0.0302	0.27	0.0309
TICN3_HUMAN	SPOCK3	0.156	0.0512	-0.0242	0.0249	0.019	-0.0097	-0.128	-0.136	-0.0376	-0.208	-0.026	-0.0879	0.108	-0.124	0.00994	-0.0408	0.353	0.101	0.157	0.0194	-0.149	0.152	0.088	0.155	-0.0847	-0.0978	0.0389	0.073	-0.0493	0.00665
TIE1_HUMAN	TIE1	-0.0138	0.199	-0.183	-0.0932	0.0103	-0.101	-0.0361	0.497	-0.112	0.41	0.211	-0.201	-0.0936	0.336	0.182	0.00566	0.21	-0.142	-0.161	0.138	0.141	0.282	-0.154	0.123	0.284	-0.219	0.0911	-0.00218	-0.0183	-0.0386
TIG1_HUMAN	RARRES1	-0.0805	-0.191	0.288	-0.846	-0.284	0.0539	-0.425	-0.138	0.161	0.523	-0.133	0.982	0.118	-0.633	0.626	-0.228	0.0541	-0.0817	-0.0948	-0.097	-0.209	0.375	0.0144	-0.382	0.821	-0.326	0.0939	-0.0298	-0.375	0.275
TIMP1_HUMAN	TIMP1	0.0293	0.106	0.0234	-0.165	0.000179	-0.327	0.334	0.16	0.114	-0.34	0.153	0.0801	-0.248	0.173	-0.0868	-0.147	-0.101	-0.0109	-0.0828	0.346	0.226	0.0853	0.104	-0.439	0.45	-0.144	-0.0331	0.136	0.0328	-0.0563
TIMP2_HUMAN	TIMP2	-0.0211	0.155	0.268	-0.237	-0.0525	-0.0145	0.0724	-0.165	0.226	-0.35	-0.22	0.352	0.00303	-0.0514	0.039	-0.126	0.04	0.238	-0.225	-0.171	0.0474	0.5	0.0135	-0.246	-0.00668	-0.216	-0.00638	0.106	-0.31	0.121
TIMP4_HUMAN	TIMP4	-0.316	-0.363	0.0938	-0.034	0.234	0.425	0.595	0.21	-0.135	0.478	0.242	0.444	-0.215	0.15	-0.0749	-0.359	0.022	-0.0834	0.564	0.0899	1.37	-0.224	0.28	-0.121	0.605	-0.154	-0.123	0.0602	0.106	-0.154
TINAL_HUMAN	TINAGL1	-0.264	0.0534	-0.0888	0.209	-0.135	0.047	-0.225	-0.0735	0.186	0.01	0.223	-0.0786	-0.0939	0.218	-0.113	-0.0882	-0.2	0.0716	0.233	-0.125	0.168	0.0935	0.0367	0.43	0.0603	-0.0696	0.0455	-0.132	-0.0184	-0.0476
TIP_HUMAN	ITFG1	0.124	0.11	-0.0497	-0.208	-0.0153	0.155	-0.0311	-0.115	0.123	-0.185	-0.0781	0.0867	0.126	-0.196	0.0774	-0.0258	0.0013	0.0865	0.0155	-0.56	-0.0944	-0.071	0.0797	0.00529	-0.166	0.0771	-0.241	0.0989	-0.00238	0.0913
TKNK_HUMAN	TAC3	-0.351	0.178	-0.507	0.111	0.0826	0.109	-0.316	-0.206	-0.12	0.428	-0.221	0.000243	0.611	-0.467	-0.111	-0.198	-0.288	-0.0685	0.341	0.0641	0.466	0.0414	0.154	-0.662	0.2	0.0679	-0.0683	-0.0286	-0.465	-0.00397
TKT_HUMAN	TKT	-0.0553	-0.0535	0.173	0.107	0.0988	-0.0571	-0.126	0.552	-0.127	0.755	-0.0175	0.345	-0.177	0.574	0.513	0.0749	-0.0899	0.0203	-0.19	-0.0222	0.422	0.0338	-0.102	0.782	0.123	-0.141	-0.0182	-0.0261	0.121	-0.0774
TLN1_HUMAN	TLN1	-0.133	-0.238	-0.104	0.0327	0.281	-0.00285	-0.00653	0.256	-0.18	1.29	0.0306	0.736	-0.228	0.0992	0.334	0.166	-0.0742	-0.362	-0.28	-0.197	0.103	-0.117	0.0838	0.903	0.29	-0.123	0.0677	-0.0211	-0.125	-0.105
TM108_HUMAN	TMEM108	0.168	-0.0111	0.0338	0.141	0.134	0.107	0.0371	-0.303	-0.118	-0.205	0.25	-0.199	-0.148	0.14	-0.129	0.0791	-0.0882	-0.0999	0.208	0.0563	-0.344	0.143	0.021	0.00813	-0.136	0.186	0.0148	-0.0509	-0.175	0.165
TM248_HUMAN	TMEM248	-0.0789	0.202	-0.0747	0.175	0.00455	0.264	-0.261	0.0599	-0.0785	-0.16	-0.239	0.0172	0.023	-0.178	0.0999	-0.0451	0.24	0.204	0.0902	-0.2	-0.34	0.0378	-0.0912	-0.0295	-0.0326	0.149	-0.0939	0.181	0.162	0.251
TM59L_HUMAN	TMEM59L	0.213	0.138	-0.252	0.0407	-0.273	0.194	-0.451	0.0522	-0.307	-0.179	0.386	-0.39	0.0524	0.0886	-0.115	-0.0716	-0.518	0.154	0.122	0.0514	0.258	0.154	-0.445	-0.2	-0.0416	-0.0805	0.25	0.176	-0.626	-0.223
TM9S3_HUMAN	TM9SF3	-0.133	0.0424	-0.146	0.077	0.077	0.196	-0.164	0.0338	-0.0713	0.0414	-0.186	-0.211	-0.0073	0.0338	-0.0853	-0.0938	0.0133	0.177	-0.133	0.142	-0.113	0.024	-0.0707	-0.256	-0.226	0.0911	0.0395	0.0638	0.0278	0.0115
TMED3_HUMAN	TMED3	0.133	0.177	0.128	-0.243	-0.357	0.252	-0.286	-0.205	0.00373	-0.0823	0.00194	-0.0379	0.0043	-0.303	-0.121	0.212	-0.134	0.17	-0.0698	0.223	-0.546	-0.0234	-0.18	-0.247	-0.167	-0.0949	-0.246	0.118	-0.258	0.105
TMED4_HUMAN	TMED4	-0.0814	-0.0139	0.287	0.0286	0.0291	-0.147	0.0998	-0.124	0.257	-0.128	-0.169	0.152	-0.159	0.0152	0.139	0.0268	-0.0458	-0.102	0.0545	0.0803	0.172	-0.107	-0.0299	-0.104	-0.166	0.155	0.0718	0.187	0.0634	0.108
TMED7_HUMAN	TMED7	-0.178	-0.0528	-0.186	0.241	-0.16	-0.155	0.037	0.259	-0.0883	0.391	0.151	-0.403	0.00475	0.276	-0.22	0.149	0.0477	-0.217	0.124	0.258	-0.0687	-0.42	-0.0317	0.211	-0.173	0.134	-0.302	0.0942	0.315	-0.0653
TMED9_HUMAN	TMED9	-0.121	-0.155	-0.141	0.117	-0.07	-0.153	-0.231	0.372	0.0587	1.18	0.603	-0.648	-0.151	-0.00977	0.0414	0.189	0.0938	0.0999	-0.0368	0.249	-0.375	-0.0558	0.105	-0.166	-0.0484	0.159	-0.397	0.376	0.216	0.477
TMEM5_HUMAN		0.0498	0.172	0.422	-0.0939	0.126	0.00326	0.359	-0.0786	-0.192	0.0632	-0.2	0.42	-0.00303	-0.0966	0.119	-0.366	0.22	0.395	-0.091	-0.101	-0.203	-0.532	0.00933	0.0676	-0.0256	0.0933	0.047	0.193	0.011	-0.302
TMG1_HUMAN	PRRG1	-0.489	0.352	0.0708	0.367	-0.175	-0.201	-0.127	0.338	-0.123	0.621	0.179	-0.504	0.238	0.133	0.14	-0.019	-0.177	-0.56	0.066	0.608	0.369	-0.139	-0.324	-0.00561	-0.682	-0.035	0.246	-0.334	0.338	0.727
TMM25_HUMAN	TMEM25	0.00291	-0.2	0.257	-0.0768	-0.035	0.162	0.43	-0.116	0.193	-0.122	0.0387	0.535	-0.274	-0.107	0.203	0.0109	0.089	0.183	-0.0965	-0.129	0.37	0.551	-0.0211	0.138	0.289	-0.233	0.0205	-0.0677	-0.215	-0.241
TMPS5_HUMAN	TMPRSS5	-0.281	-0.0782	-0.357	-0.323	0.0146	0.05	0.333	0.186	0.151	0.397	0.0326	-0.00133	-0.385	-0.13	0.148	0.0696	0.223	0.143	-0.162	-0.426	0.0146	0.358	-0.114	0.0583	-0.288	0.174	0.323	-0.135	-0.433	-0.00525
TNF12_HUMAN	TNFSF12	0.0439	-0.023	0.0385	0.0967	-0.0323	-0.329	-0.00422	0.0155	-0.031	0.226	-0.147	0.025	-0.00677	0.116	0.0865	-0.233	0.0996	-0.0182	0.121	-0.0648	-0.29	-0.194	-0.0731	-0.000217	-0.296	3.22e-05	0.00128	0.0305	-0.0196	0.0469
TNF13_HUMAN	TNFSF13	0.149	0.222	0.128	0.00671	-0.112	-0.0713	-0.0414	0.114	0.322	-0.324	0.191	-0.0289	-0.12	-0.0937	-0.0573	0.0342	0.184	0.257	-0.0403	0.0169	-0.0741	0.328	0.0777	-0.166	-0.0841	0.0726	-0.00507	-0.0921	-0.0885	0.298
TNNC2_HUMAN	TNNC2	-0.0121	-0.0419	0.109	-0.248	0.206	-0.145	0.154	-0.0459	-0.00689	0.379	0.16	0.244	-0.138	-0.346	0.196	0.0506	-0.457	0.0258	-0.0994	-0.0173	0.285	0.139	0.192	0.362	0.298	-0.422	-0.0887	-0.0111	-0.274	0.0999
TNNI2_HUMAN	TNNI2	0.287	0.154	0.17	-0.371	0.128	-0.0122	-0.0294	-0.00136	0.251	-0.0915	-0.429	0.223	-0.115	-0.0508	0.19	0.015	-0.0306	0.0743	-0.201	0.15	0.311	0.353	0.192	0.292	0.433	-0.324	0.11	0.0163	-0.0811	0.306
TNR21_HUMAN	TNFRSF21	0.0248	0.272	0.0183	0.191	-0.0808	0.251	-0.131	-0.17	0.0335	-0.249	-0.185	0.127	0.326	-0.181	-0.0971	0.0805	-0.0515	0.177	-0.00952	-0.014	-0.195	0.018	-0.0282	0.459	-0.378	0.329	-0.0299	-0.0677	0.00241	-0.0174
TOLIP_HUMAN	TOLLIP	-0.0354	-0.259	-0.298	0.0821	-0.134	0.279	0.0243	0.177	0.123	0.182	0.179	0.0284	-0.053	-0.0397	0.151	-0.34	0.0574	0.0387	0.099	-0.235	0.277	0.0718	0.0201	0.55	0.295	0.00225	0.0519	-0.128	-0.121	-0.154
TOM1_HUMAN	TOM1	-0.245	-4.44e-05	0.322	0.302	0.0182	-0.109	-0.195	-0.528	0.185	-0.272	-0.306	-0.334	-0.587	-0.0986	0.182	-0.212	0.333	0.304	-0.0134	0.0331	0.103	-0.16	0.204	0.0628	-0.376	-0.0526	0.206	0.0652	0.0713	-0.185
TPBG_HUMAN	TPBG	-0.0883	0.179	-0.158	0.0245	0.0085	0.415	-0.00384	-0.0887	0.207	0.295	-0.127	0.0677	0.215	0.0117	-0.0584	0.374	0.0995	0.131	-0.218	-0.238	0.0461	0.00523	-0.114	0.424	-0.343	0.0317	0.0822	-0.161	0.0434	0.0139
TPD52_HUMAN	TPD52	-0.149	-0.235	-0.706	0.0804	0.0777	-0.253	0.232	0.0988	-0.247	-0.293	0.241	-0.0013	-0.289	0.235	-0.201	-0.185	-0.0852	-0.311	0.0401	0.323	0.0604	-0.199	0.124	-0.461	0.0149	0.0833	-0.178	-0.0257	0.287	-0.357
TPIS_HUMAN	TPI1	0.0426	-0.12	-0.129	0.184	-0.146	0.0252	-0.468	0.0612	-0.0652	0.107	-0.0311	-0.0659	0.144	-0.0603	0.146	-0.0115	-0.0506	-0.0578	-0.0018	-0.45	-0.471	-0.0976	-0.357	0.0145	-0.323	0.0655	0.0705	-0.0377	0.0919	-0.19
TPM1_HUMAN	TPM1	0.0306	-0.131	0.083	-0.0246	0.27	0.064	0.101	0.166	0.0188	0.657	-0.124	0.181	-0.252	0.177	0.168	0.195	-0.276	-0.243	-0.108	-0.106	0.28	-0.000329	-0.00321	0.599	0.233	-0.388	-0.0918	-0.188	-0.162	-0.169
TPM2_HUMAN	TPM2	0.0603	0.054	-0.0438	-0.249	0.0799	-0.0868	-0.0852	0.099	0.0494	0.645	-0.308	-0.448	-0.329	0.249	0.575	0.414	-0.47	-0.077	0.19	0.0149	0.433	-0.848	-0.0707	0.412	0.268	-0.0405	-0.192	-0.0156	-0.028	-0.361
TPM3_HUMAN	TPM3	0.226	-0.202	0.269	0.757	0.911	-0.168	0.15	-0.249	-0.0664	0.332	0.183	0.402	-0.224	-0.104	-0.152	0.623	-0.443	-0.467	-0.65	-0.352	0.254	-0.166	-0.161	1.13	0.28	-0.421	0.0404	-0.327	-0.31	-0.758
TPM4_HUMAN	TPM4	-0.0865	-0.351	0.058	0.096	0.389	-0.235	-0.297	0.521	0.0295	1.35	0.0528	0.292	0.0165	1.05	0.389	-0.336	-0.416	-0.517	0.206	-0.495	0.0837	-0.309	0.137	1.24	0.238	-0.554	-0.0616	-0.178	-0.224	-0.241
TPP1_HUMAN	TPP1	0.0606	0.0957	0.313	-0.25	0.0413	-0.0595	0.134	-0.237	0.026	-0.117	-0.0891	0.279	0.109	-0.241	0.245	0.0321	0.359	0.131	-0.15	-0.168	-0.0124	0.237	0.0295	-0.2	-0.0302	-0.0974	0.202	-0.0671	-0.0412	0.12
TPPP3_HUMAN	TPPP3	0.0123	-0.0133	0.434	-0.225	-4.6e-05	-0.0329	-0.161	0.203	0.183	-0.207	-0.293	0.347	0.0813	-0.0256	0.186	0.0654	-0.0415	0.192	-0.378	-0.00858	0.211	0.27	-0.00363	-0.247	-0.0949	0.0525	-0.0208	-0.0705	-0.269	0.117
TPST1_HUMAN	TPST1	-0.13	-0.000213	0.0556	0.0158	0.0304	-0.295	-0.0225	0.0622	0.0373	-0.33	-0.00726	-0.288	-0.0223	-0.11	-0.0145	-0.225	-0.0873	0.0703	0.132	0.0617	0.0364	-0.134	0.068	-0.202	0.12	0.0947	-0.0141	0.0907	-0.00367	0.0552
TPST2_HUMAN	TPST2	-0.0235	-0.104	-0.37	0.135	0.165	0.0273	-0.0277	0.108	0.0726	-0.543	0.0381	-0.259	0.403	-0.0552	-0.374	0.115	-0.0727	-0.0505	0.113	0.0834	-0.48	-0.274	0.076	-0.364	-0.182	0.176	-0.102	0.0465	-0.0206	0.00411
TR11B_HUMAN	TNFRSF11B	0.154	-0.358	0.219	0.0576	-0.299	-0.28	-0.117	0.229	0.264	-0.305	0.113	-0.358	-0.0185	0.208	-0.235	-0.0839	-0.181	0.28	0.468	-0.0688	0.181	-0.0787	0.388	-0.241	0.209	-0.215	0.321	0.163	0.159	-0.47
TR19L_HUMAN	RELT	0.01	0.298	0.336	-0.0479	0.0418	0.0858	0.0172	-0.216	-0.134	-0.587	0.171	0.357	0.339	-0.374	-0.117	0.041	-0.226	-0.156	0.225	-0.215	0.136	0.303	0.226	0.191	0.0256	-0.269	-0.0992	-0.327	-0.323	-0.208
TRFE_HUMAN	TF	-0.0687	-0.429	-0.179	0.86	0.312	-0.23	1.36	-0.191	0.533	-0.346	1.21	0.252	-0.39	1.31	-0.397	-0.0797	-0.00233	-0.344	-0.185	0.288	2.36	0.355	-0.0135	-0.0547	1.34	-0.13	-0.184	-0.00412	-0.141	-0.0378
TRFL_HUMAN	LTF	0.758	-1.12	0.27	-1.17	-0.826	-0.00423	0.132	-0.0703	0.302	0.684	-0.127	0.425	0.409	0.341	-0.655	-0.95	1.13	-0.511	-1.04	-0.0714	-0.57	-0.946	0.223	0.626	0.677	-0.99	-0.814	-0.297	0.629	-0.831
TRFM_HUMAN	MELTF	-0.0581	0.0707	0.0614	-0.171	0.193	0.0187	-0.169	0.143	-0.0267	0.908	-0.0816	0.273	-0.192	-0.116	0.093	0.0453	0.0955	0.465	-0.165	-0.198	-0.0167	0.0723	0.00405	0.603	-0.161	0.218	-0.0253	0.155	-0.134	-0.0472
TRH_HUMAN	TRH	0.601	0.00423	-0.0149	0.017	-0.0136	-0.0387	0.483	-0.117	-0.15	0.155	0.207	0.168	0.0235	-0.0998	-0.0509	-0.122	-0.307	0.451	-0.102	0.215	0.726	0.19	-0.0328	0.19	0.194	-0.196	-0.178	-0.0556	0.124	0.155
TRHDE_HUMAN	TRHDE	0.0349	-0.0711	-0.194	-0.0269	0.04	0.248	-0.0147	-0.102	-0.078	0.191	0.0405	-0.382	-0.1	0.0834	0.0644	-0.0604	0.207	0.087	0.214	-0.156	0.0307	-0.243	0.0275	-0.0967	-0.174	0.221	0.0532	-0.123	0.419	-0.151
TRIL_HUMAN	TRIL	-0.156	-0.0148	0.0932	-0.488	0.0859	0.121	-0.0273	0.0372	-0.174	0.0466	0.223	-0.282	0.118	-0.131	0.0493	-0.181	0.047	-0.103	0.0446	0.108	-0.266	0.101	0.019	-0.188	-0.188	-0.401	-0.138	0.0661	-0.367	0.144
TRXR1_HUMAN	TXNRD1	0.0767	0.0887	0.0503	0.0506	-0.163	0.0998	-0.203	-0.049	-0.149	0.279	0.105	-0.0536	0.0558	-0.21	-0.0104	0.188	-0.139	-0.159	-0.104	-0.22	0.229	-0.0372	-0.25	0.108	-0.106	0.0501	0.0172	0.096	0.0988	-0.0454
TRXR2_HUMAN	TXNRD2	0.27	0.0821	0.343	-0.419	0.042	0.179	0.324	-0.249	0.0379	-0.213	0.175	-0.394	-0.349	-0.212	-0.374	0.0542	0.0493	0.0921	0.0626	0.408	0.0269	-0.229	-0.0738	-0.098	0.2	-0.0344	-0.0294	-0.209	0.104	0.211
TRY1_HUMAN	PRSS1	-0.0854	-0.427	0.187	-0.433	0.491	-0.0145	0.351	-0.349	0.182	-0.734	-0.413	0.0424	-0.599	-0.191	0.159	-0.363	0.272	-0.00974	0.97	0.000243	0.73	-0.173	0.162	-0.23	0.467	0.0301	-0.271	0.457	-0.72	-0.0811
TRY2_HUMAN	PRSS2	-0.0882	-0.221	0.205	-0.325	0.241	0.216	-0.0592	0.00403	0.0103	0.769	-0.449	0.529	-0.0318	-0.416	-0.112	0.0331	0.191	0.104	0.332	0.0132	0.546	0.0112	0.222	0.303	0.513	-0.152	-0.255	-0.117	-0.308	-0.163
TSK_HUMAN	TSKU	0.0234	-0.317	-0.168	0.329	0.461	-0.0876	-0.413	0.251	-0.0266	0.299	-0.592	-0.191	-0.11	-0.444	0.0953	0.395	-0.103	0.242	-0.0976	-0.273	0.722	0.0943	0.206	0.0495	0.289	-0.106	0.115	-0.16	-0.273	0.129
TSP1_HUMAN	THBS1	-0.196	0.107	0.0371	-0.208	0.135	-0.155	-0.0881	0.0466	0.0927	0.393	0.00338	0.349	-0.159	-0.158	-0.151	0.204	0.0484	0.127	-0.193	0.0144	0.00814	0.172	-0.00954	-0.121	0.182	-0.128	-0.119	-0.0837	-0.199	0.254
TSP2_HUMAN	THBS2	0.0715	0.0463	0.425	-0.36	-0.172	0.0264	-0.0802	-0.123	0.164	-0.218	-0.188	-0.0434	0.32	-0.132	-0.116	0.115	0.328	0.304	-0.262	0.0229	0.018	0.373	0.137	-0.333	-0.0431	-0.097	0.103	-0.0446	-0.016	0.163
TSP3_HUMAN	THBS3	0.145	-0.145	0.104	-0.119	0.0515	-0.126	0.404	-0.428	-0.44	-0.0945	-0.155	0.515	-0.0736	0.0161	0.182	-0.48	-0.0518	0.111	0.07	-0.0771	-0.51	0.16	0.0129	-0.0763	-0.0834	0.101	0.0774	0.07	0.0224	-0.201
TSP4_HUMAN	THBS4	0.119	-0.0658	0.0423	0.0318	0.0315	0.0294	0.103	-0.38	-0.0144	-0.245	-0.0304	0.074	-0.143	0.22	0.024	0.0976	-0.299	-0.0507	-0.168	0.133	0.302	-0.0222	0.191	-0.187	0.156	0.0781	-0.146	-0.0469	-0.257	0.0681
TTHY_HUMAN	TTR	0.171	0.117	-0.184	-0.428	0.0284	-0.0549	0.579	0.0461	-0.23	0.749	-0.141	0.578	-0.00502	-0.441	-0.000268	0.54	0.681	-0.165	-0.411	-0.0497	1.76	0.251	-0.122	0.309	0.0954	-0.241	0.0308	0.0214	-0.566	0.0361
TXD15_HUMAN	TXNDC15	-0.121	0.31	0.398	-0.244	-0.159	-0.0646	0.188	0.267	0.158	-0.218	0.00228	0.392	0.426	-0.558	-0.0798	0.419	0.15	0.153	0.0426	-0.234	0.343	0.453	-0.0354	-0.0845	-0.0039	-0.119	-0.0363	-0.0667	-0.475	0.36
TXD17_HUMAN	TXNDC17	-0.144	0.117	0.0988	-0.222	-0.0486	0.0806	-0.233	0.0151	0.00987	0.307	-0.326	0.0641	0.207	-0.179	-0.0152	0.0671	-0.0359	0.114	-0.177	0.141	-0.293	0.148	-0.0918	0.0798	-0.254	-0.108	-0.09	-0.0726	-0.0799	0.147
TXND5_HUMAN	TXNDC5	-0.14	0.0979	0.088	-0.00704	-0.146	-0.0552	0.0826	0.0988	-0.000678	-0.121	-0.0349	-0.207	-0.0158	0.0474	-0.114	-0.0695	0.0912	0.132	-0.0664	0.0788	-0.132	-0.131	-0.0519	0.0204	0.0768	-0.0398	-0.206	0.0664	0.0447	0.0444
TXNL1_HUMAN	TXNL1	-0.112	-0.0743	0.193	-0.0971	0.181	0.181	0.0186	0.351	0.0681	0.712	-0.248	0.288	-0.0677	0.0405	0.0909	0.239	-0.214	0.298	0.076	-0.0932	-0.257	0.115	-0.192	0.67	-0.02	0.0372	0.0265	0.0617	-0.0474	0.0101
TYB10_HUMAN	TMSB10	-0.0777	0.0468	-0.277	0.455	-0.209	0.034	-0.31	0.22	0.119	-0.164	0.0389	-0.324	-0.0726	0.46	0.107	-0.295	-0.164	-0.355	-0.0362	0.0687	0.157	-0.000799	0.101	-0.101	0.118	0.333	-0.113	-0.0898	0.0747	-0.149
TYB4_HUMAN	TMSB4X	0.00125	0.0884	-0.00192	0.0767	-0.0348	0.128	-0.109	-0.0511	0.0777	-0.374	-0.0653	0.0553	0.129	0.145	0.227	-0.164	-0.0918	-0.052	-0.154	0.104	-0.26	0.143	-0.0485	-0.161	-0.283	0.098	-0.0684	0.0643	-0.134	0.104
TYPH_HUMAN	TYMP	-0.342	-0.326	-0.223	0.26	0.369	-0.00559	-0.232	0.386	-0.0379	1.18	-0.53	0.467	-0.183	-0.388	0.0135	1.51	0.117	-0.00866	-1.14	-0.283	0.119	-0.246	0.0942	0.789	0.613	-0.213	-0.143	0.0226	0.187	-0.319
TYRO3_HUMAN	TYRO3	-0.0197	-0.0392	-0.276	0.17	0.31	-0.106	0.096	0.0122	-0.216	-0.116	-0.112	-0.0233	0.33	-0.104	0.0521	0.0534	0.135	0.192	-0.00831	-0.146	-0.0484	0.132	-0.071	-0.238	-0.0327	0.235	0.0451	0.0236	0.319	-0.0704
UB2D2_HUMAN	UBE2D2	0.0932	-0.399	-0.214	0.0991	-0.0741	-0.333	0.282	0.171	-0.082	0.424	-0.222	0.105	0.29	-0.788	-0.334	0.115	0.314	-0.0609	0.214	0.293	0.387	0.0534	-0.111	0.188	0.583	-0.122	-0.259	-0.0812	-0.0824	-0.393
UB2D3_HUMAN	UBE2D3	0.11	-0.213	-0.112	-0.0991	0.206	0.0768	-0.178	0.0652	0.0114	0.291	-0.163	0.0189	0.21	-0.0973	0.16	0.0244	0.00378	-0.0556	0.042	0.144	-0.3	-0.118	-0.0215	0.391	-0.0186	-0.0238	-0.00512	-0.0381	-0.0375	-0.0127
UB2V1_HUMAN	UBE2V1	-0.117	0.134	-0.104	0.203	0.0155	-0.0197	-0.104	0.428	0.0565	0.467	0.208	0.21	-0.0747	0.0833	-0.0159	0.418	-0.0172	-0.118	0.106	-0.115	-0.127	-0.0225	-0.179	0.337	-0.0325	0.126	0.0313	0.0403	0.237	-0.065
UB2V2_HUMAN	UBE2V2	0.0393	-0.304	0.0649	-0.277	0.288	0.161	-0.164	0.00783	0.131	-0.44	-0.322	-0.0632	0.0785	-0.0801	0.167	-0.231	-0.0585	0.0837	0.236	0.373	0.288	-0.168	-0.35	-0.157	0.702	0.0195	-0.0937	-0.146	0.0567	0.0494
UBA1_HUMAN	UBA1	0.0275	-0.196	0.161	-0.0775	0.371	0.1	-0.0922	0.697	-0.2	1.46	-0.198	0.62	-0.244	0.348	0.53	0.812	0.0056	-0.0353	-0.291	-0.52	0.356	0.111	-0.0808	1.45	0.0714	-0.343	0.124	-0.0799	-0.222	-0.152
UBE2N_HUMAN	UBE2N	-0.108	-0.265	-0.0328	0.401	0.144	-0.0871	0.0358	0.74	-0.0154	1.48	0.254	0.198	0.323	0.249	0.208	0.55	-0.242	-0.519	0.213	-0.198	-0.0221	-0.206	-0.122	1.34	-0.199	0.081	0.336	-0.0468	0.051	-0.148
UBL3_HUMAN	UBL3	0.216	0.124	0.146	-0.0901	0.195	0.0808	-0.0263	0.00614	0.025	-0.619	-0.297	-0.285	0.274	-0.148	0.197	-0.333	-0.0542	-0.0214	0.144	0.0442	-0.51	-0.226	-0.122	-0.305	-0.357	0.166	-0.0128	-0.292	0.0205	-0.012
UBP5_HUMAN	USP5	-0.135	0.0443	0.0566	0.0747	0.449	0.0188	-0.284	0.854	0.0517	1.72	0.181	0.259	-0.353	0.42	0.156	1	-0.178	-0.0981	0.138	-0.149	0.229	0.0718	-0.208	1.75	0.00116	-0.187	0.184	-0.105	-0.228	-0.0977
UCHL1_HUMAN	UCHL1	0.358	-0.0792	0.131	-0.171	0.164	-0.0205	0.0172	-0.288	0.234	-0.07	-0.136	-0.0823	0.209	0.363	0.647	-0.137	0.0295	-0.0595	-0.014	-0.203	0.153	0.261	-0.157	0.137	-0.306	0.101	0.155	-0.0414	0.143	-0.035
UFC1_HUMAN	UFC1	0.0478	0.0829	-0.208	-0.0427	0.24	0.0277	0.0185	0.23	-0.105	0.558	0.32	-0.214	-0.278	0.114	-0.0264	-0.0286	-0.194	-0.236	0.192	-0.033	0.0989	-0.0447	-0.153	0.366	0.276	-0.383	0.0181	-0.0708	0.019	-0.0869
UFD1_HUMAN	UFD1	-0.0692	-0.332	0.101	0.0652	0.00582	0.0698	0.236	-0.198	-0.0197	-0.272	0.159	0.0405	-0.151	-0.206	-0.0774	-0.175	-0.198	0.0271	0.185	0.237	0.114	0.0244	-0.00131	0.605	0.0093	-0.114	0.158	-0.223	-0.173	-0.0409
UFO_HUMAN	AXL	0.0917	0.0783	-0.03	0.0281	-0.486	0.0364	0.0824	-0.225	-0.0754	0.000153	0.0263	0.144	0.138	0.0427	-0.0328	-0.204	-0.0852	0.112	-0.0315	-0.258	0.0505	0.0852	0.0221	-0.188	0.192	-0.133	-0.0303	-0.149	-0.0701	-0.00323
UGGG1_HUMAN	UGGT1	-0.0242	0.0312	0.0473	-0.00926	0.135	-0.0875	-0.119	0.0502	0.0638	0.411	0.0253	0.178	-0.166	-0.0419	0.115	0.123	-0.0792	0.0568	0.0328	-0.192	0.3	0.211	0.142	0.419	0.00616	0.0649	0.117	-0.14	-0.137	0.136
UGPA_HUMAN	UGP2	0.0308	-0.378	0.116	0.139	0.219	-0.0538	-0.0185	0.793	-0.13	1.44	0.0738	0.105	-0.562	0.141	0.137	1.27	-0.128	-0.463	-0.305	-0.231	0.249	-0.346	-0.303	1.54	0.0964	-0.329	0.141	-0.201	-0.185	-0.396
UK114_HUMAN		0.164	0.272	0.171	-0.264	-0.0221	0.158	-0.0211	-0.151	0.0222	-0.113	-0.0111	-0.15	0.296	-0.308	0.0989	0.0263	0.013	-0.169	0.124	-0.116	-0.274	0.188	-0.0526	-0.128	-0.234	0.0555	0.00304	0.0504	-0.121	0.0366
UNC5A_HUMAN	UNC5A	-0.0379	0.136	-0.0482	0.152	0.101	0.325	-0.024	0.0995	0.00306	-0.149	-0.119	-0.0357	0.0449	0.094	-0.158	-0.107	0.0464	-0.0178	-0.0522	0.196	-0.0198	0.0618	0.085	-0.13	0.0351	0.169	0.0393	-0.0552	0.0355	-0.0101
UNC5B_HUMAN	UNC5B	0.0188	0.0538	0.0252	-0.00211	0.0529	0.261	-0.15	-0.0835	-0.151	-0.089	-0.0828	-0.24	0.0609	0.0801	-0.0611	0.0389	-0.0478	0.267	0.0811	-0.0139	-0.163	-0.11	0.0102	-0.288	-0.116	0.168	-0.0984	0.0648	0.0949	0.0124
UNC5C_HUMAN	UNC5C	-0.0733	0.109	0.0643	0.091	-0.211	-0.0929	-0.179	-0.0768	-0.183	-0.111	0.0717	0.108	-0.0899	0.136	-0.0792	-0.00566	-0.15	-0.00586	0.0215	0.244	-0.104	0.159	0.0377	-0.192	-0.102	-0.0808	-0.133	0.0733	0.193	0.014
UNC5D_HUMAN	UNC5D	0.0707	0.295	-0.246	0.221	-0.101	0.17	-0.247	-0.0812	0.0328	0.0698	-0.0529	-0.297	0.208	-0.278	-0.256	-0.0266	-0.363	-0.258	0.0329	-0.137	-0.406	-0.0945	0.016	0.106	-0.272	0.274	-0.0318	0.0613	0.0176	0.139
UPAR_HUMAN	PLAUR	-0.104	-0.0371	-0.331	0.0581	0.2	-0.08	-0.144	0.601	0.0412	0.935	0.3	-0.513	-0.133	0.334	0.05	0.189	-0.0686	-0.401	0.351	0.0723	-0.107	0.0147	-0.068	-0.166	0.0436	0.4	0.234	-0.093	0.279	-0.182
UST_HUMAN	UST	-0.0405	0.00079	0.0148	-0.287	0.213	0.159	-0.237	0.0533	0.0551	-0.101	0.0611	0.0624	-0.113	0.0482	-0.0118	-0.137	0.298	-0.0787	0.231	-0.214	-0.0998	-0.206	0.0677	-0.0223	0.316	0.00673	-0.0903	-0.138	0.0437	0.115
UTER_HUMAN	SCGB1A1	0.0528	0.0886	0.358	0.0141	-0.259	0.425	0.601	-0.213	0.759	-0.438	-0.379	-0.107	-0.616	0.325	0.651	-0.43	-0.454	-0.0826	0.368	1	0.582	-0.164	0.00694	0.183	0.352	-0.629	-0.00213	-0.144	-0.588	0.213
VAMP2_HUMAN	VAMP2	-0.0368	0.00603	-0.0791	0.288	-0.0273	0.102	-0.0178	0.195	-0.0603	0.0436	-0.0274	0.00958	-0.0781	0.0843	-0.118	-0.0844	-0.0354	0.044	0.0873	0.115	0.257	-6.08e-05	-0.0816	0.0492	0.116	0.148	-0.00229	-0.0105	0.17	-0.147
VAPA_HUMAN	VAPA	0.0325	-0.0993	-0.0942	0.0703	-0.0204	0.0696	-0.117	0.105	-0.129	0.168	-0.097	0.179	0.0981	0.111	-0.214	0.0075	0.0855	0.0879	0.0715	-0.246	0.0798	-0.154	-0.128	-0.161	-0.0128	0.0805	-0.0379	0.17	0.495	-0.0518
VAS1_HUMAN	ATP6AP1	-0.101	-0.0115	0.00911	0.276	0.00559	0.00449	-0.178	0.0764	-0.322	0.112	0.0889	-0.273	0.129	0.21	0.00661	-0.0079	-0.0529	0.275	0.339	-0.172	-0.183	-0.249	-0.00501	-0.163	0.00923	0.318	0.0754	0.0989	0.279	-0.0768
VASN_HUMAN	VASN	-0.154	-0.0901	-0.0175	-0.146	0.0161	-0.0327	0.195	0.0388	0.0554	-0.153	-0.0686	0.0839	0.0368	0.00331	-0.295	0.0611	0.0755	-0.00886	-0.175	0.0833	0.118	-0.00598	0.0423	0.268	0.0539	-0.178	-0.101	-0.193	-0.231	0.000481
VAT1_HUMAN	VAT1	0.00885	-0.237	-0.316	0.164	0.0482	-0.0639	-0.0947	0.311	-0.116	0.756	-0.187	0.0434	-0.0233	0.769	0.503	-0.0217	-0.0618	-0.0647	-0.113	-0.02	0.338	0.0835	-0.318	0.525	0.227	0.247	0.00491	-0.136	-0.0396	0.0763
VCAM1_HUMAN	VCAM1	-0.15	0.0644	0.0706	-0.235	-0.116	-0.183	0.208	0.106	0.0519	-0.359	-0.00339	-0.279	0.00607	0.0951	-0.205	-0.125	-0.179	0.0386	-0.0087	0.337	0.109	0.386	-0.095	-0.162	0.141	-0.271	-0.164	-0.151	-0.0216	0.0478
VEGFA_HUMAN	VEGFA	0.225	-0.0425	0.667	-0.136	0.000241	0.0133	-0.249	-0.124	0.227	-0.105	-0.301	0.15	0.483	-0.136	0.32	-0.0576	0.25	0.214	0.137	-0.168	-0.103	-0.262	0.23	-0.239	0.17	-0.0666	-0.118	0.00532	0.0915	0.129
VEGFC_HUMAN	VEGFC	0.0702	-0.0444	0.202	0.112	-0.407	0.335	0.299	0.0507	0.263	-0.273	-0.0884	-0.23	0.397	0.029	-0.0607	-0.0923	0.117	0.0733	-0.21	0.0131	-0.00107	-0.201	0.0984	-0.245	-0.226	0.25	0.102	0.179	0.163	-0.0107
VGF_HUMAN	VGF	-0.045	0.005	-0.144	0.347	0.373	0.24	-0.0439	-0.0418	0.0708	-0.276	-0.00859	-0.162	0.352	-0.0776	-0.00313	-0.119	-0.125	0.145	0.282	0.0193	-0.255	-0.00694	0.0295	-0.0884	-0.321	0.555	0.054	0.0213	0.16	0.0375
VGFR3_HUMAN	FLT4	0.147	0.00746	-0.548	0.177	0.166	0.146	0.0696	0.00696	-0.092	0.299	0.17	-0.0585	-0.412	0.407	-0.144	-0.0931	0.0529	-0.284	0.132	-0.233	0.702	0.0487	-0.11	-0.0968	0.389	-0.331	-0.176	0.0121	-0.212	-0.106
VIME_HUMAN	VIM	-0.711	-0.0201	0.254	-0.138	0.362	-0.602	-0.143	0.535	0.185	1.19	-0.208	-0.0743	-0.387	1.62	2.12	-0.0277	-0.0166	-0.107	-0.167	-0.154	1.23	-0.0719	-0.0354	1.46	0.279	-0.287	0.569	-0.49	0.117	-0.329
VINC_HUMAN	VCL	-0.261	-0.104	-0.0765	-0.0485	0.407	-0.119	0.0836	0.369	0.131	0.617	-0.0846	0.232	-0.0728	0.378	0.419	0.0552	-0.247	-0.275	-0.156	0.354	0.409	-0.105	0.213	0.543	-0.0162	-0.253	0.134	-0.101	0.0287	-0.0588
VISL1_HUMAN	VSNL1	0.299	0.0422	-0.397	0.525	0.211	0.0685	0.283	0.061	0.0263	-0.304	-0.218	0.051	0.199	0.157	0.0544	-0.202	-0.736	0.0914	0.166	-0.219	-0.213	-0.382	-0.145	-0.585	0.156	0.466	-0.183	-0.212	0.545	0.185
VITRN_HUMAN	VIT	-0.0156	0.00155	0.214	-0.46	-0.371	0.362	0.165	0.0141	0.0599	-0.066	-0.677	-0.124	-0.232	-0.31	-0.167	0.077	-0.142	0.185	0.149	0.0312	0.295	0.0813	0.0299	-0.375	0.102	-0.488	-0.124	-0.205	-0.485	0.204
VLDLR_HUMAN	VLDLR	0.185	0.235	-0.368	-0.367	-0.0161	0.144	-0.187	-0.11	0.0572	0.126	0.119	-0.458	-0.233	-0.215	-0.0306	0.277	0.0675	0.15	-0.312	-0.00765	0.0144	0.0608	-0.282	0.569	-0.358	0.0708	-0.00238	-0.223	0.116	-0.138
VMO1_HUMAN	VMO1	-0.231	0.041	-0.196	-0.331	0.0716	0.0901	0.158	0.0829	-0.279	0.0848	-0.168	0.273	-0.365	-0.0774	0.0158	0.000427	-0.383	0.525	-0.404	-0.169	0.196	0.203	0.0434	-0.0759	0.172	0.0463	0.064	-0.163	-0.364	-0.613
VNN1_HUMAN	VNN1	-0.532	-0.0107	-0.0534	0.187	0.651	0.469	-0.33	-0.423	0.454	0.13	0.118	1.11	-1.01	0.179	-0.408	-0.411	-0.0893	-0.287	-0.323	0.377	0.28	1.05	0.65	0.393	0.511	-0.468	-0.0675	-0.631	-0.462	-0.591
VSIG4_HUMAN	VSIG4	-0.0813	0.397	0.608	0.0919	-0.0164	0.232	-0.0583	-0.396	0.174	-0.125	-0.296	-0.122	-0.112	0.0464	0.0337	0.167	0.551	0.278	-0.284	0.0371	-0.175	0.334	-0.214	0.103	0.467	-0.117	-0.303	0.387	-0.371	0.395
VTDB_HUMAN	GC	0.0909	-0.245	0.205	-0.165	0.129	0.494	0.634	-0.717	0.101	-0.223	0.691	0.813	-1.03	0.0537	0.0345	-0.166	0.222	-0.324	0.162	0.0293	0.989	0.792	0.36	-0.161	0.833	-0.485	-0.145	-0.00132	-0.356	-0.0431
VTM2A_HUMAN	VSTM2A	-0.00192	0.00828	-0.413	0.293	-0.0894	0.0518	-0.234	-0.00888	0.0236	-0.516	-0.038	-0.028	0.378	0.0129	-0.179	-0.0667	-0.0633	-0.414	0.24	0.0853	-0.449	-0.0199	0.107	-0.244	-0.45	0.417	0.0818	0.0209	0.0843	0.126
VTM2B_HUMAN	VSTM2B	-0.0191	0.0398	0.0166	-0.0833	0.0532	0.309	-0.163	-0.203	0.158	-0.336	-0.226	0.0163	0.0735	-0.213	-0.0169	-0.145	0.0273	-0.0341	-0.205	0.388	-0.506	0.0386	0.0951	-0.118	-0.384	0.153	-0.0668	0.0273	0.082	0.0155
VTNC_HUMAN	VTN	-0.0771	-0.245	0.4	-0.249	0.574	0.426	0.214	-0.721	0.176	0.318	0.537	1.03	-0.448	-0.351	-0.268	-0.0267	0.0783	-0.179	-0.219	0.17	0.747	0.826	0.336	-0.0454	0.85	-0.582	-0.192	-0.138	-0.598	0.117
VWA1_HUMAN	VWA1	0.0461	0.183	-0.00869	-0.338	0.0462	0.0888	0.0429	-0.0836	0.243	-0.255	-0.0959	0.334	0.0607	-0.192	-0.134	-0.0515	0.066	0.0541	-0.341	-0.0209	-0.0975	0.217	0.148	-0.172	-0.211	5.63e-05	0.0108	-0.101	-0.149	0.121
VWA7_HUMAN	VWA7	-0.0634	0.00692	-0.413	0.217	-0.0298	-0.275	-0.0379	0.244	0.0947	0.207	0.0191	-0.35	0.146	-0.0964	0.0728	0.0327	0.271	-0.194	-0.043	-0.247	-0.27	-0.297	-0.14	-0.164	-0.203	0.0921	0.0256	0.126	0.138	-0.274
VWC2_HUMAN	VWC2	-0.139	0.0649	-0.101	0.308	-0.073	0.0684	-0.18	0.161	-0.0528	-0.118	0.301	-0.456	0.0356	-0.0249	-0.122	0.0188	-0.0983	0.121	0.302	0.201	-0.37	-0.153	-0.0938	-0.215	0.00928	0.216	-0.0981	0.184	0.26	0.0657
VWF_HUMAN	VWF	-0.308	0.245	-0.168	0.0643	0.106	-0.167	0.0948	0.206	-0.0961	0.219	-0.302	0.111	-0.0651	0.0855	-0.244	-0.131	0.0712	0.202	0.0289	0.189	0.149	-0.0556	-0.0343	-0.0044	0.5	-0.0454	-0.178	-0.00358	-0.0792	-0.109
WBP2_HUMAN	WBP2	-0.37	-0.232	-0.243	0.254	-0.0344	-0.312	0.0172	0.343	0.0864	0.295	0.113	-0.617	-0.104	0.418	-0.141	-0.062	0.0483	-0.0931	0.321	-0.0643	0.149	-0.395	-0.0375	0.126	0.186	0.0676	-0.106	0.0786	0.534	-0.223
WDR1_HUMAN	WDR1	-0.238	-0.0628	-0.176	-0.0347	0.291	-0.193	-0.193	0.369	0.0505	0.582	-0.132	0.17	0.121	0.145	0.399	0.123	-0.0158	-0.289	-0.179	0.285	0.39	-0.0692	0.0356	0.534	-0.026	-0.41	0.0648	-0.0566	-0.0496	0.00354
WFDC1_HUMAN	WFDC1	-0.399	-0.479	0.323	-0.07	0.461	0.527	-0.124	0.109	0.0639	0.00976	0.0929	-0.753	-0.294	0.422	-0.388	-0.61	0.305	0.0591	0.765	0.0244	-0.333	-0.358	-0.0217	0.033	0.366	-0.0118	-0.39	-0.137	0.4	0.146
WFKN2_HUMAN	WFIKKN2	-0.25	0.0294	0.455	-0.0133	-0.127	-0.0945	-0.399	0.192	0.071	-0.05	0.197	-0.219	-0.374	0.356	0.205	-0.0834	-0.113	0.0417	-0.015	-0.0753	-0.241	0.0358	0.039	-0.00574	0.259	0.243	0.153	-0.0567	-0.324	0.0637
WIF1_HUMAN	WIF1	0.14	-0.269	-0.349	0.0148	0.277	0.111	-0.0338	0.0267	0.09	0.407	0.021	0.275	-0.219	-0.0337	-0.101	-0.134	0.35	-0.222	0.343	-0.26	-0.207	-0.428	0.0394	-0.0797	-0.169	0.443	0.0496	-0.0806	0.243	-0.0979
WNT4_HUMAN	WNT4	-0.204	-0.0578	-0.042	0.148	0.206	-0.0163	0.246	0.0619	0.0891	-0.000157	-0.0957	0.0463	0.164	0.128	-0.102	0.0214	-0.312	-0.06	-0.0312	-0.05	0.26	-0.0806	0.158	0.209	0.163	-0.0962	0.137	0.0436	-0.126	0.0445
WSCD1_HUMAN	WSCD1	-0.00546	0.0147	0.334	0.037	-0.132	0.0621	0.134	-0.0526	-0.164	-0.0293	0.0827	-0.236	-0.0476	0.0334	-0.174	-0.0571	0.0161	0.024	0.26	-0.00435	-0.105	-0.263	0.151	-0.00361	0.0385	0.0262	-0.0523	0.122	0.298	-0.00902
WSCD2_HUMAN	WSCD2	-0.0414	-0.00686	0.398	0.0476	-0.0623	-0.0394	0.056	0.0282	-0.113	-0.248	-0.246	-0.352	-0.257	-0.132	-0.295	-0.00434	0.0144	0.439	0.229	0.0592	-0.294	-0.275	-0.175	0.278	0.0773	-0.0403	-0.375	-0.00924	-0.157	0.0936
X3CL1_HUMAN	CX3CL1	0.00268	-0.0494	0.0223	-0.106	0.101	0.41	-0.477	0.0492	0.00518	0.134	-0.0757	0.101	0.454	-0.188	-0.0597	0.332	-0.2	-0.0379	0.0235	-0.0515	-0.377	0.175	-0.0417	0.184	-0.427	0.478	0.173	-0.156	0.0119	0.187
XXLT1_HUMAN	XXYLT1	-0.224	-0.178	-0.227	0.234	-0.07	-0.389	-0.0371	0.0957	-0.107	0.109	-0.0224	-0.308	0.0312	0.0301	-0.0561	-0.223	-0.0182	-0.143	0.259	0.0812	-0.0796	-0.259	0.0418	-0.00258	0.0701	-0.0335	0.0249	-0.0111	0.155	-0.145
XYLK_HUMAN	FAM20B	0.00221	0.0414	0.027	-0.212	0.0204	-0.0431	0.0467	0.00674	0.125	-0.013	-0.0498	-0.19	-0.179	-0.0485	-0.0963	-0.124	0.0821	0.143	0.0843	0.0552	-0.299	-0.185	-0.0256	0.0241	-0.0392	-0.00375	-0.127	0.0736	-0.0554	0.0518
XYLT1_HUMAN	XYLT1	0.0918	0.0171	0.156	0.0154	-0.0695	0.155	-0.078	-0.0926	-0.0209	0.172	-0.0574	0.00625	-0.0223	-0.157	0.0109	-0.0304	0.164	0.195	0.199	-0.276	-0.293	0.0181	0.0649	-0.104	-0.0267	0.159	0.0142	-0.121	0.141	-0.194
XYLT2_HUMAN	XYLT2	0.0289	-0.184	0.306	-0.0302	-0.0679	0.0773	0.124	-0.13	-0.268	-0.213	-0.0653	0.0901	-0.0942	0.122	0.131	-0.157	0.0787	0.289	0.0833	-0.0689	-0.119	-0.0298	-0.0374	0.0731	0.263	-0.0715	0.12	0.0626	-0.0389	0.0669
[truncated: 7 more rows]
